# Supplementary material for: Intermittent Hypoxia Mimicking Sleep Apnea Induces Systemic and Tissue Specific Epigenetic Changes and p16-Mediated Cellular Senescence Underlying Vascular Dysfunction
Source: Research Square preprint supplement (doi:10.21203/rs.3.rs-9371471/v1), 2026-04-15
Supplement: Supplementary file 1 [file 3829c06a76d7805b35cd2151.xlsx]

## Sheet: Left cardiac ventricle
Supplementary Table S5: Overrepresented physiological functions related to DMP-associated genes in cardiac left ventricle samples
Category	p-value	Molecules
Liver Hyperplasia/Hyperproliferation	2.78E-117-1E00	A1BG,AADAT,AAMDC,AAMP,AARS2,AASDHPPT,AATK,ABCA5,ABCC1,ABCC5,ABCG2,ABCG8,ABI2,ACACB,ACADL,ACAT1,ACKR3,ACLY,ACOT7,ACOT9,ACP1,ACSL4,ACTL7B,ACTN1,ACTN4,ACTR10,ACTR1A,ACTR2,ACTRT1,ADA,ADAD1,ADAM10,ADAM15,ADAM30,ADAMTS10,ADAMTS20,ADAMTS5,ADAMTS6,ADAMTS9,ADARB2,ADCK1,ADCY2,ADCY8,ADCYAP1,ADGB,ADGRB1,ADGRB3,ADGRD1,ADGRG2,ADGRG4,ADGRL2,ADGRL3,ADIPOR2,ADPGK,ADRA2B,ADRB3,ADTRP,AFF2,AFF3,AGAP1,AGBL1,AGBL4,AGF…
Hepatocellular carcinoma	2.8E-35-1E00	AADAT,AARS2,AASDHPPT,ABCG2,ABCG8,ACACB,ACADL,ACAT1,ACLY,ACOT9,ACSL4,ACTN1,ACTRT1,ADA,ADAM10,ADAM30,ADAMTS10,ADAMTS9,ADARB2,ADCY2,ADGRB1,ADGRG2,ADGRG4,ADGRL3,ADPGK,ADRB3,AIG1,AKAP11,AKAP13,ALPL,AMOT,ANLN,ANO1,ANXA10,APC,AR,ARHGAP10,ARID1B,ARID2,ARMC10,ARMC3,ASAP1,ASB3,ASRGL1,ASS1,ASTN2,ATF2,ATG2A,ATG2B,ATP6V1E1,ATP8A2,ATP9A,ATXN1,AUH,AUTS2,B3GAT2,B4GALNT3,BARD1,BARX2,BAZ1B,BAZ2A,BBOX1,BCAT1,BDH1,B…
Cardiac Arrythmia	9.31E-19-1E00	ABHD17C,ACHE,ACKR3,ADRA2B,ADRB3,AFF3,AGBL4,AKAP6,AKIRIN2,ALPK1,ANK2,ANKRD17,ANXA4,AOPEP,AR,ARHGAP10,ARHGEF40,ARID2,ARL13B,ARMH3,ASS1,ASTN2,ATP1A4,ATP2B1,ATXN1,BAIAP2,BBS7,BICRA,BRWD1,CACNA1F,CACNA2D1,CACNB2,CADPS2,CAMK2D,CASZ1,CATSPERE,CCDC170,CCDC171,CCND1,CDC42EP3,CDCA2,CDH2,CDH20,CDK6,CDKN1A,CEP68,CEP85L,CFAP58,CFI,COL1A2,COL3A1,COLQ,CREM,CRIM1,CTNNA3,CYBB,CYS1,CYTH1,DLC1,DLEC1,DLG1,DMD,DMPK,D…
Cardiac Arteriopathy	3.91E-16-1E00	ABCG8,ABI2,ACLY,ADA,ADARB2,ADGRL3,ADRA2B,ADRB3,AGAP1,AGPAT4,AHDC1,AKAP13,ALDH7A1,ALOX5AP,ANKRD55,ANKS1A,AR,ARID5B,ARMH3,ASIC2,ASTN2,ATP2B1,ATXN1,ATXN2,ATXN3,B4GALNT2,BAG6,BDNF,BDP1,BICC1,BMPR1B,C19orf38,CA14,CA7,CACNA1F,CACNA2D1,CACNB2,CAPS2,CCM2,CD109,CD36,CDC123,CDH9,CDK12,CELSR2,CENPO,CHD2,CHD9,CHRNB4,CNR1,CNTLN,COL5A2,CORO1C,CPT1A,DAB1,DCLK2,DIP2B,DMXL1,DMXL2,DOCK5,DPP4,DTNA,ERBB4,ERI3,ETV1,E…
Congenital Heart Anomaly	3.35E-13-1E00	ACHE,ACKR3,ACVR2B,ADAMTS6,ADARB2,ADGRL2,ADRA2B,ADRB3,ANK2,AP1B1,AP2B1,ASIC2,ATP1A4,BICC1,BMP7,CASZ1,CCBE1,CCM2,CCND1,CCNE2,CDH2,CDK13,CHD7,CITED2,COL11A2,COL1A2,CTNNA3,Cxcl5,CYBB,CYP51A1,DDX3X,DGCR8,DLC1,DSP,DTNA,EPHA3,ETS1,FLT4,FOXP1,FOXP2,GATA6,GLYATL3,GPC3,HMGCR,IFT46,IFT74,INPP4B,INVS,ITPR3,KDM5A,KDR,KIF7,KLF12,KLF13,KLHL29,KYNU,LRP1B,MACROD2,MAML3,MAP3K7,MED13L,MEF2C,MGAT1,MGAT4C,mir-133 (in…
Renal Necrosis/Cell Death	8.71E-12-6.31E-01	AATF,ABCC1,ABCG2,AKAP11,ALKBH8,AMOTL1,API5,AR,ATG7,ATP1A4,ATXN3,BCAP31,BCL2L14,BCL6,BIK,BIRC2,BNIP3L,C4a/C4b,CABLES1,CALB1,CASP7,CASP8,CCDC47,CCNI,CD300LB,CDKN1A,CDON,CITED2,CLU,COL1A2,COX11,CUL4B,CYBB,Cyp2c65/Cyp2c66,DCC,DDX24,DPP4,E2F6,EGFR,EMC2,EMP1,EPHB2,ERBB4,ERN1,EZR,FAT1,FOXO3,FUT8,GAS7,GATAD1,GLIS2,GLS,Gm5524,GPBAR1,GPR39,GRM1,GSK3B,HDAC6,HGF,HIP1,HMGA2,HNF1B,IGF1,INPPL1,IP6K2,IRS1,ITCH,I…
Liver Steatosis	1.05E-10-5.82E-01	ACADL,ACAP3,ACLY,ACSL4,ACVR2B,ADCYAP1,ADIPOR2,ADRB3,Akr1b7,AMT,AR,ARHGAP10,ARNT,ATG7,ATP8B1,ATXN2,B4GALNT1,BCAT1,BCO1,BDNF,BLOC1S1,BPTF,CACNA2D1,CAMTA1,CAND1,CCND1,CCR3,CD36,CDKN1A,CES3,CHCHD3,CLU,CNR1,CNTNAP2,CPT1A,CPT1C,CRELD2,CRTC3,CYSLTR1,DCLK1,DDC,DEPDC5,DNAJC12,DPP4,EGFR,EGLN1,EIF2A,ELOVL6,ERN1,EYA1,F8,FANCC,FGFR2,FOXO3,FSTL1,GABRA3,GABRE,GABRG1,GALNT2,GGT1,GHR,GHRL,GK,GLDC,GOT1,GPBAR1,GPD2…
Cardiac Enlargement	1.13E-09-1E00	ABCA5,ABCC1,ACKR3,ADA,ADAM15,ADGRD1,ADRA2B,ADRB3,AKAP13,AKTIP,ANK2,ASIC2,ATF2,ATP6V1E1,ATXN1,CACNA1F,CACNA2D1,CACNB2,CAMK2D,CAMK2G,CAST,CASZ1,CD36,CDC42EP3,CDH11,CDH2,CDK12,CDK13,CDK9,CDKN1A,CEP85L,CHD7,CIB1,CMKLR1,COL1A2,COL3A1,CPT1A,CREB1,CREM,CTNNA3,CTSD,CYBB,DACT1,DGCR8,DGKD,DHX36,DMD,DMTF1,DPF3,DPP4,DSP,DTNA,DUSP10,EAF2,EFNB2,EGFR,EGLN1,EP300,ERBIN,FBN2,FGF12,FOXM1,FOXO3,FUBP1,FUNDC1,GALNT1,…
Heart Failure	3.45E-09-5.82E-01	ABHD17C,ACHE,ADRA2B,ADRB3,ANK2,AOPEP,AQP2,AR,ARID5B,ASIC2,ATP1A4,ATXN2,BBS9,BDNF,BIRC2,BPTF,BRWD1,CA14,CA7,CACNA1F,CACNA2D1,CACNB2,CAMK2D,CASP8,CASZ1,CCDC171,CCT3,CD36,CDK6,CDKN1A,CDS1,CELSR2,CEP85L,CYP51A1,DDC,DGCR8,DHX36,DPP4,DUSP6,E2F3,E2F6,EFEMP1,EGFR,EGLN1,EP300,EPHA3,ERBIN,EVI5,EVX1-AS,FBXL20,FLT4,FOXN3,FOXP1,GAB1,GABRA3,GABRE,GABRG1,GHR,GRID1,GTF2IRD2,HACE1,HCN4,HMGB1,HMGCR,IGF1,IGSF1,ITPR…
Liver Fibrosis	6.18E-07-1E00	ABCC1,ABCC5,ABCG2,ACSL4,ADRA2B,ADRB3,ALPL,ARHGAP10,ATXN2,BMP7,CASP7,CASP8,CBLB,CCL1,CCND1,CCR6,CD180,CDC42EP3,CDKN1A,CHCHD3,CNR1,COCH,COL1A2,COL3A1,DAGLB,DGKQ,DLG1,DNMT3A,DPP4,DUSP10,EDIL3,EFEMP1,EMP1,ERBB4,ETS1,FBXL20,FGFR2,FLT3,FOXN3,FSTL1,GCLM,GHR,GLIS2,GPBAR1,GRIN2A,HGF,HMGB1,HMGCR,HRH1,IGF1,IGF2,IKBKB,IL11RA,IL23R,IL7R,INPP5A,ITGAV,ITGB3,ITPR2,KIAA1549L,KIF21B,KRT8,LBR,LHX2,LIN28B,LOXL4,LRP6…
Liver Necrosis/Cell Death	3.71E-06-1E00	ACSL4,ADA,APC,API5,AR,ARNT,ATF2,ATG7,ATR,BIRC2,BRCC3,CASP7,CASP8,CCND1,CDKN1A,CFH,CPB2,CTH,DUSP10,EGFR,ERN1,FOXO3,GOT2,GSK3B,HGF,HMGB1,IGF1,IKBKB,IRF2,ITGAV,ITGB2,ITGB3,KLRK1,KRT8,LAMP2,LIF,MAP2K1,MAP3K7,MAP3K8,MAPK14,MAPK3,MEG3,MET,MME,MYCN,NAMPT,NCOA6,NF1,NFKB1,NFKBIA,NGFR,NR1H4,NR2C1,PALLD,PDCD1,PIK3CG,PRKCQ,PROS1,RNF13,SERPINH1,SH3BP5,SIDT2,SLC10A2,SLC25A5,SOCS3,SOD2,STAP1,STAT3,STK3,STK4,TLR…
Cardiac Proliferation	4.51E-06-1E00	ABCG2,AGRN,APC,ARID2,BMPR1A,CASZ1,CCBE1,CCND1,CDK20,CDKN1A,CITED2,CRTC2,DHX36,DIPK2A,DNAJB6,E2F3,EGFR,ERBB4,FGFR2,FOXM1,FOXP1,GATA6,GSK3B,HMGB1,IGF1,ITGB2,LDHA,MAP2K1,MAPK14,MEF2C,mir-133 (includes others),mir-506 (includes others),MYCN,MYH10,NCAM1,NRG1,PTBP1,RACK1,RBL2,Rmst,STAT3,TBX20,TENM4,ZFPM2
Cardiac Congestive Cardiac Failure	9.79E-06-9.79E-06	ADRA2B,ADRB3,AQP2,AR,ASIC2,ATP1A4,BBS9,BIRC2,CA14,CA7,CACNA1F,CACNA2D1,CACNB2,CDKN1A,CELSR2,DDC,DPP4,E2F3,EGLN1,EPHA3,GTF2IRD2,HMGCR,KCNA4,MME,MYCN,MYH10,NR3C1,NR3C2,PDE2A,PDE4D,PDE5A,PDE7A,PDE7B,PPARG,SBF2,SLC12A3,SLC7A11,SOAT1,TFAP2B,THRB,TLL1,XDH,ZFPM2
Cardiac Necrosis/Cell Death	1.64E-05-1E00	ABCB8,ABCG2,APELA,AR,ATG7,BDNF,BIRC2,BNIP3L,CACNB2,CAMK2D,CASP8,CDK9,CDKN1A,CREM,CTH,CYBB,DPP4,DSP,DUSP6,E2F3,EGLN1,FOXO3,FSTL1,FTX,FUNDC1,GHRL,GNB1,GSK3B,HGF,HSPA8,IGF1,IKBKB,IRAK1,IRAK4,IVNS1ABP,KNG1,LAMP2,LIF,MAOA,MAP2K1,MAP3K7,MAPK14,MEF2A,MEF2D,MFN2,mir-133 (includes others),mir-19 (includes others),mir-30 (includes others),MRTFA,NAMPT,NFKBIA,NR3C2,NR4A1,NRG1,NTN1,PDE4D,PKN1,PPP1R10,PRKN,RAS…
Cardiac Dilation	3.02E-05-1E00	ABCA5,ABCC1,ADAM15,ADGRD1,ADRB3,ANK2,ASIC2,ATP6V1E1,ATXN1,CACNA1F,CACNB2,CAMK2D,CAST,CASZ1,CDC42EP3,CDH11,CDH2,CDKN1A,CEP85L,CHD7,COL3A1,CREB1,CTNNA3,DDC,DGCR8,DGKD,DHX36,DMD,DMTF1,DSP,DTNA,EGLN1,EP300,FBN2,FGF12,FOXO3,FUNDC1,GAB1,GATA6,GATAD1,GNAS,GSK3B,HCN4,HMGCR,IKBKB,IRAK4,IRS1,KDM6A,Klk1b1 (includes others),LAMA2,LAMA4,LAMP2,MAPK14,MARCKSL1,MDM4,MEF2A,MGAT1,mir-133 (includes others),mir-19 (…
Liver Inflammation/Hepatitis	3.51E-05-1E00	ABCG2,ADAM10,ADIPOR2,ALPL,ARHGAP10,ATP8B1,BCL6,BDNF,BIRC2,BLOC1S1,C4a/C4b,CASP7,CBLB,CCR3,CES3,CHRNA10,CLEC4G,CNR1,COL3A1,CPT1C,CYSLTR1,DCLK1,DEPDC5,DNAJC12,DPP4,EGFR,ELOVL6,EMP1,EPS15,FANCC,FBXL5,FNTB,GABBR1,GABRA3,GABRE,GABRG1,GHR,GHRL,GOT1,GPBAR1,GRIA3,GRID1,GRIN2A,HECTD3,HERC2,HGF,HLA-A,HMGB1,HMGCR,IGF1,IGF2,IKBKB,IL12B,IL23R,IL7R,IRAK1,IRAK4,ITGB2,Klrb1c (includes others),KRT8,KSR1,LRP6,MAGI…
Renal Damage	3.79E-05-1E00	ACAT1,ADARB2,ADRA2B,ADRB3,APELA,AQP2,AR,ATG7,BBS9,BMP7,C4a/C4b,CA14,CA7,CCND1,CDH12,CDH26,CDKN1A,CDKN3,CFH,CLU,COL3A1,CP,CYBB,Cyp2c65/Cyp2c66,EGLN1,EIF4G3,ERN1,FGR,GABPB1,GGT1,GPBAR1,GPRC5B,HGF,HMGCR,IGF1,IGFBP5,IL12B,KCNMA1,Klrb1c (includes others),Kng2,LRP6,LRRK2,MAPK14,MECP2,MME,MMUT,MTNR1A,NR3C2,NTN1,ODC1,PDE4D,PDE5A,PDE7A,PDE7B,PECR,POU2F1,POU2F2,PPARG,PPP3CC,PREX1,RGMB,RIPK2,SLC12A3,SLC16A7…
Liver Cirrhosis	4.44E-05-1E00	ABCC1,ABCC5,ABCG2,ADA,ADRA2B,ADRB3,ALPL,AR,ARHGAP10,ATXN2,CACNA2D1,CASP7,CASP8,CCR6,CD180,CDC42EP3,CNR1,COCH,COL1A2,COL3A1,DGKQ,DLG1,DNMT3A,EFEMP1,FBXL20,FLT3,GABRA3,GABRE,GABRG1,GCLM,GGT1,GHR,GRIN2A,HDAC9,HGF,HMGCR,HRH1,IL23R,IL7R,INPP5A,KIF21B,KRT8,LBR,LOXL4,MACROH2A1,MANBA,mir-221 (includes others),mir-30 (includes others),MTNR1A,NADSYN1,NDFIP1,NFKB1,NR1H4,NR3C1,NR3C2,NR4A1,OPRM1,PDE4D,PDE5A,P…
Cardiac Fibrosis	7.16E-05-6.31E-01	ACADL,ACLY,AKTIP,AR,BCL6,BMPR1A,CAMK2D,CAMK2G,CDON,CIB1,CREB1,CREM,CRNDE,CYBB,DMD,DPP4,DSP,DTNA,DUSP10,EP300,ERN1,ETS1,FOXM1,GNAS,GSK3B,H19,HDAC6,IL11RA,IRAK4,LAMA4,MAPK14,MBNL1,MEF2D,mir-133 (includes others),mir-30 (includes others),MME,NF1,NFKB1,NFKBIA,NOTCH3,NR3C2,OTUD1,PAK1,PALLD,PDCD1,PELI1,PLA2G4A,PPM1L,RALGAPA1,RASSF1,Rmst,SGCD,SIRPA,SIRT7,SOD2,Sox2ot,SPP1,STAT3,STK11,STK3,STK4,TARS2,TFEB…
Renal Proliferation	7.47E-05-6.31E-01	AATF,ABCC5,ABCG2,AKAP13,AMOT,BAG6,CABLES1,CCNH,CD36,CDKN1A,DLC1,DPF3,DUSP6,EGFR,ENC1,ERBB4,FBN2,FOXO3,HGF,HMGA2,IGF1,IGF2,ITPR1,ITPR2,ITPR3,KCNMA1,KNG1,LARP1,LGALS8,MAGI2,MAPK14,MED28,MGA,NAMPT,NF2,NTN1,OGT,OXTR,PAX2,PBX1,PIK3CD,PLD2,POLG,PPM1A,PRRC2B,PTCH1,RASSF1,ROCK2,SALL4,SOCS3,Sox2ot,STAT3,STMN1,TFDP1,THOC1,TJP1,TLR2,TLR9,TMEFF2,TMEM260,TNS3,TPP2,TRADD,TSC1,TSC2,UNC5A,USP4,USP7,ZNF512B
Cardiac Hypoplasia	9.13E-05-3.92E-01	ANKRD17,CASZ1,CYP51A1,FOXM1,ITGAV,MEF2C,mir-133 (includes others),MYCN,NCOA6,NFATC4,NRG1,PARD3,PBRM1,PKP2,TGFB2,TH,WT1,ZFP36L1,ZFPM2
Renal Hypoplasia	1.49E-04-3.92E-01	ACVR2B,BAG6,BMP7,CRIM1,CTNNBIP1,DACT1,DCC,DLG1,EYA1,FMN1,GREB1L,GRIP1,NPNT,PAX2,PBX1,PPM1A,RARB,SALL4,SLIT3,SRGAP1,SYN3,TGFB2,TSHZ2
Renal Inflammation	2.03E-04-1E00	ACTN4,ADAMTS5,ADAMTS6,ADGRL2,AFF3,ANKRD55,AR,ARMH4,ARSA,ASAP1,ASNS,ATG7,AUNIP,BAIAP2,C4a/C4b,CCDC146,Ccl4,CD2,CD28,CDKN1A,CFH,CFI,CHD2,CLU,COL4A5,CTNNA3,EGFR,EP300,FARS2,FGR,FOXO3,FRMD4A,FUT8,GLIS2,HGF,HIVEP3,HNF1B,HRH1,ICOS,IGF1,IL12B,IL23R,IL7R,INF2,IRAK1,IRAK4,KDR,KLF13,LIF,LNPEP,LRRK2,LYPLA1,MAGI2,MAN2A1,MARK2,mir-133 (includes others),mir-25 (includes others),mir-30 (includes others),mir-365…
Renal Nephritis	2.03E-04-1E00	ACTN4,ADAMTS5,ADAMTS6,ADGRL2,AFF3,ANKRD55,AR,ARMH4,ARSA,ASAP1,ASNS,ATG7,AUNIP,BAIAP2,C4a/C4b,CCDC146,Ccl4,CD2,CD28,CDKN1A,CFH,CFI,CHD2,CLU,COL4A5,CTNNA3,EGFR,EP300,FARS2,FGR,FOXO3,FRMD4A,FUT8,GLIS2,HGF,HIVEP3,HNF1B,HRH1,ICOS,IGF1,IL12B,IL23R,IL7R,INF2,IRAK1,IRAK4,KDR,KLF13,LIF,LNPEP,LRRK2,LYPLA1,MAGI2,MAN2A1,MARK2,mir-133 (includes others),mir-25 (includes others),mir-30 (includes others),mir-365…
Pulmonary Hypertension	3.62E-04-1E00	ABCG2,ADA,ADRA2B,ADRB3,AGBL1,AR,ATP13A3,BMPR1A,BMPR1B,CA14,CA7,CD36,CMKLR1,CPB2,CTSE,EGLN1,F8,FGF12,FMR1,FOSL2,GATA6,GSK3B,IL12B,KDR,KITLG,LRP6,LRPPRC,MESD,MME,MRTFA,MTNR1A,MYH7B,NFKBIA,NOTCH3,NR3C2,PDCD1,PDE2A,PDE4D,PDE5A,PDE7A,PDE7B,PDGFD,PPARG,PROK2,PTPRD,RBMX,ROBO2,RPTOR,SCN1A,SLC7A11,SLCO4A1,SPP1,STAT3,TET2,THY1,VIP,WDR5
Increased Levels of Red Blood Cells	4.45E-04-3.92E-01	ARID4B,BNIP3L,CCND1,CD36,Cd59b,CDK6,CIAPIN1,FANCC,FLI1,FOXO3,GATA6,HGF,IREB2,ITGB3,KITLG,KLF13,LAMA4,LGMN,MDM4,NCOR1,NFKB1,PBX1,PHF6,PICALM,RAPGEF2,SALL4,SIN3B,SLC7A1
Nephrosis	4.49E-04-5.74E-01	ACTN4,ADAMTS9,AHI1,ANLN,AR,ASIC2,ATP1A4,BBS9,BMP7,CA14,CA7,CD28,CDK20,CDKN1A,CEP164,CLCN5,CLU,COL4A5,DCDC2,FAT1,GLIS2,HRH1,INCENP,INF2,INVS,ITGA3,KALRN,LIMA1,MAGI2,MYH9,NIPBL,NPHP3,NR3C1,NR3C2,NUP93,PAX2,PDE4D,PDE5A,PDE7A,PDE7B,PPP3CC,PTPRD,SFMBT2,SIRPA,SLC12A3,SRGAP1,TBC1D8B,TNFSF15,WT1,XPO5,ZNF423
Liver Proliferation	4.76E-04-3.92E-01	ACSL4,ADA,APC,ARNT,BIRC6,BMP7,CAMK2G,CCND1,CDKN1A,CITED2,CNR1,CPB2,DLC1,DLG1,EGFR,FBXL5,FGFR2,FOXM1,GPC3,GSK3B,HGF,HMGB1,HMGCR,IGF1,IGF2,IKBKB,ITGAV,ITGB3,ITPR1,KITLG,MAP3K7,MAPK14,MET,mir-221 (includes others),mir-30 (includes others),MKI67,NCOA6,NCOR1,NFKB1,NFKBIA,NGFR,NR1H4,ODC1,P2RY2,PPARG,PROS1,SERPINH1,SLC39A14,SOCS3,SPP1,STAT3,STK3,TNFRSF1A,TOB1,TRIM24,WT1,XBP1,XDH
Cardiac Infarction	6.26E-04-1E00	ABCG8,ACLY,ADGRL3,ADRA2B,ADRB3,AGPAT4,AHDC1,ANXA4,ARHGAP25,ARRB1,ATP2B1,ATXN2,CA14,CA7,CACNA2D1,CACNB2,CCM2,CCR3,CD109,CD36,CDKN1A,CELSR2,CLU,COL3A1,CYBB,DCLK2,DMXL1,DUSP6,FOXO3,FSTL1,GCLM,GIGYF2,GSK3B,GXYLT2,HGF,HMGCR,HRH1,ILF3,IPO9,ITGAV,ITGB2,ITGB3,KALRN,KCNA4,KIAA1217,KRT8,LCK,LOXL4,MAP4,MAPK14,MAPK3,MBD5,MIA3,mir-133 (includes others),MITF,MME,MRTFA,NBEAL1,NDST2,NGFR,NR3C2,NRXN1,OLR1,OPRM1,P…
Glomerular Injury	7.13E-04-1E00	ACTN4,ADAMTS5,ADAMTS6,ADGRL2,AFF3,ANKRD55,ANLN,APELA,AR,ARMH4,ARSA,ASAP1,ASNS,BAIAP2,BMP7,C4a/C4b,CASP8,Ccl4,CCNI,CD2,CD28,CDH12,CDKN1A,CFH,CFI,CHD2,CLU,COL18A1,COL4A5,CRIM1,CTNNA3,DNAH6,EGFR,EGLN1,EP300,ERN1,EXOC5,FARS2,FAT1,FGR,FRMD4A,FUT8,GHR,GLIS2,Gm5524,GPBAR1,HDAC9,HGF,HIVEP3,HMGA2,HMGCS2,HRH1,HUWE1,ICOS,IL11RA,IL12B,IL23R,IL7R,INF2,INPPL1,INVS,IPO4,IRAK1,IRAK3,IRAK4,ITGA3,ITGB3,Kap,KCNMA1,…
Kidney Failure	8.75E-04-1E00	ACHE,ACTN4,ADA,ADRA2B,ADRB3,AQP2,AR,BICC1,CACNA2D1,CACNB2,CD28,CDKN1A,CFI,CHRNA10,CHRNB4,CHRNE,CYP51A1,EGFR,ERCC6,ETS1,F8,FUT8,GABRA3,GABRE,GABRG1,GHR,GLIS2,GLRA1,HDAC9,HGF,HMGCR,HRH1,INVS,KNG1,LGMN,MAGI2,MSI1,MYH9,NR1H4,NR3C1,NR3C2,PDE4D,PDE5A,PDE7A,PDE7B,PPARG,PPP3CC,PVT1,QPRT,SLC2A9,SLC7A11,SOAT1,SOCS3,SOS2,SPP1,SSTR3,SSTR5,STAT3,STC1,STMN1,TCF7L2,TENM2,TFEB,TLR2,TNFRSF1A,TOP2B,TSC1,UBXN7,WT1,…
Cardiac Dysfunction	1.01E-03-1E00	ACKR3,ADAMTS5,ADCY7,ADRB3,ANK2,AR,ARFGAP2,B3GNT7,BACH2,C9,CACNA1F,CACNA2D1,CACNB2,CAMK2D,CAMK2G,CAST,CD36,CDC73,CDH11,CDKN1A,CHST9,CLU,CNDP1,COL11A1,COL4A5,CPB2,CPT1A,CREM,CTNNA3,CYBB,DGCR8,DMD,DPP4,DSP,DTNA,DUSP6,E2F3,EDIL3,EFEMP1,EGFR,EP300,EPB41,ETS1,EXT1,FOXM1,GRB14,GREB1L,GSK3B,HAPLN1,HCN4,HDAC6,HDAC9,HGF,HMGCR,HNRNPR,IGF2,IGSF10,IKBKB,ITGB2,ITGB3,ITPR1,KCTD16,KITLG,KNG1,LAMA4,LAMP2,LUM,MAP2…
Renal Hyperplasia/Hyperproliferation	1.16E-03-1.17E-01	CDKN1A,CFH,HGF,LGMN,MARK2,PJA2,PKN1,TNFRSF13B,TRAF3IP2,WT1
Liver Failure	1.55E-03-3.92E-01	ADRA2B,ADRB3,CASP7,CASP8,COL1A2,EFEMP1,HGF,HRH1,IKBKB,IL23R,KNG1,LOXL4,MMUT,OPRM1,PDCD1,PPP3CC,SLC38A3,SLC7A11,SPP1,SSTR3,SSTR5,TOP2B,TPO
Renal Fibrosis	2.06E-03-3.12E-01	BMP7,EGFR,EXOC5,FUT8,GLIS2,HDAC9,HGF,HMGCS2,IL11RA,INVS,IRAK3,KIF26B,KMT2A,KNG1,LGMN,LYPLA1,MAGI2,MAN2A1,MSI1,NR1H4,NR2F2,NR3C1,PLA2G4A,PRKN,RGMB,RORC,SETD2,SLC2A9,SMYD2,Sox2ot,SPP1,STAT3,STC1,STMN1,TFEB,THY1,TNFRSF13B,TNFRSF1A,UBXN7,WT1,XDH
Tachycardia	4.05E-03-5.74E-01	ACHE,ADRA2B,ADRB3,ANK2,AR,ATP1A4,CACNA1F,CACNB2,DMPK,DSP,GLRA1,HCN4,HYDIN,KCNA4,KCNH7,KITLG,LAMA4,MAOA,MAOB,OPRM1,PKP2,PPARG,RYR1,TECRL,THRB,TRDN,TRPM4
Liver Hypoplasia	7.96E-03-7.96E-03	ATF2,CDK6,ERN1,HGF,LHX2,MAFK,MYCN,NF1,PBX1,TSC1,TSC2,XBP1
Renal Atrophy	9.62E-03-1E00	AQP2,COL4A5,EFEMP1,EGFR,GLIS2,GPC3,LGMN,LRRK2,MAGI2,NFAT5,PJA2,SLC2A9,TFEB
Renal Hydronephrosis	1.54E-02-2.2E-01	AQP2,CLU,CNTFR,DACT1,DLG1,FGF13,FSTL1,GPC3,HGF,HIVEP3,IGF1,LGMN,LMOD1,LRRC8A,NFAT5,PDCD1,PJA2,RARB,SLC2A9,TGFB2
Increased Levels of Alkaline Phosphatase	2.14E-02-1.49E-01	ALPL,BMP7,BMPR1A,BMPR1B,DNMT3A,Ifi204 (includes others),IGF1,IGF2,IGFBP5,IRS1,MAPK14,MAPK3,MEF2C,MGAT5,MN1,SLC10A2,TNFRSF19,WDR5
Cardiac Regeneration	2.2E-02-3.92E-01	ABCG2,AGRN,CDKN1A,DHX36,ERBB4,HMGB1
Renal Dysplasia	2.32E-02-2.2E-01	BICC1,CLU,EXOC3L2,GREB1L,H19,NPHP3,PAX2,SRGAP1
Cardiac Inflammation	2.94E-02-1E00	ACKR3,BCL6,CFH,CLU,CTNNA3,DPP4,DSP,HMGB1,IFNA4,IRAK4,ITGB2,MME,NFKB1,NINJ2,NR3C1,NR3C2,NRG1,PRKCQ,PTPRQ,RASSF1,TBC1D8,TLR7,TLR9,TNFRSF1A,TRAF3,TRIP4,TUBB,USP4
Liver Regeneration	2.98E-02-4.63E-01	ATF2,CASP8,CCND1,CREM,EGFR,GPC3,HGF,IKBKB,ITPR1,LIF,MET,NR1H4,ODC1,PPM1A,SLC39A14,SOCS3,STAT3,TNFRSF1A,TOB1,UPF2
Liver Damage	3.29E-02-1E00	APC,ASNS,ATG7,ATP8B1,CAND1,CASP8,CBLB,CDKN1A,CFH,DEPDC5,DUSP10,EDIL3,FBXL5,FGR,GSK3B,HLA-A,HMGB1,IFNA4,IGF1,IGF2,IKBKB,ITGB2,KCNIP4,KNG1,KRT8,LIF,LRRK2,MAP3K8,MAPK14,MET,mir-30 (includes others),MSR1,MTHFR,NFKB1,NR1H4,NR3C1,PAPSS2,PAWR,PDCD1,PRKN,RASGRP1,SCAP,SH3BP5,SLC39A10,SLC7A11,SLCO1B3,SPP1,SQSTM1,STAT3,TLR2,TLR9,TNFRSF1A,XBP1
Increased Levels of Hematocrit	3.51E-02-3.51E-02	BNIP3L,CCBE1,CD36,Cd59b,CIAPIN1,CPB2,FBXL5,FLI1,IREB2,ITGB3,LAMA4,LGMN,LHX2,NCOR1,NR2C1,PBX1,SLC4A4,SOD2,SPP1
Cardiac Damage	3.79E-02-1E00	ABCC1,ADRB3,ANK2,AR,ARNT,CDKN1A,Chil3/Chil4,Clec10a/Mgl2,COL3A1,CYBB,FGR,HMGCR,HMGCS2,IGF1,LAMA4,MME,NR3C1,NR3C2,PDCD1,PIK3CG,POLA1,SGCD,STAT3,TOP2B,TXN,ZBTB16
Liver Cholestasis	3.9E-02-1E00	ABCC1,ABCG2,ABCG8,ADA,ATP8B1,ATXN2,BAAT,CACNA2D1,CDKN1A,CES3,GGT1,GK,HDLBP,HGF,HMGCR,HNF1B,LIPC,mir-128 (includes others),mir-30 (includes others),mir-493,MMUT,NCOA6,NR1H4,PEX2,SIK3,SLC10A2,SLCO1B3,TJP2,TNFRSF10B,UNC45A
Renal Tubule Injury	4.09E-02-1E00	ACAT1,CCND1,CDKN3,COL3A1,CP,CYBB,Cyp2c65/Cyp2c66,GPBAR1,HGF,IGF1,IGFBP5,Kng2,MAPK14,ODC1,PECR,POU2F1,POU2F2,RGMB,SLC16A7,SLC38A3,Slco1a5,Slco6b1,SPP1,ST6GALNAC3,TFEB,TLR2,TLR7,TMSB4X
Liver Hemorrhaging	6.08E-02-6.08E-02	DGCR8,IKBKB,KRT8,LIF,MRTFB,NF1,TAB2,TLL1
Liver Dysplasia	6.99E-02-2.2E-01	CCND1,MAP3K7
Increased Levels of ALT	9.22E-02-2.39E-01	CD36,FSTL1,FUNDC1,HMGB1,ITGB2,ITGB3,KNG1,SIRT4,SPP1,TLR9,TNFRSF1A
Cardiac Stenosis	1.02E-01-1E00	ACKR3,CITED2,GABRA3,GABRE,GABRG1,GALNT1,GLRA1,HMGCR,KDR,SPP1,STAT3
Hepatocellular Peroxisome Proliferation	1.06E-01-4.6E-01	Cyp2c65/Cyp2c66,MSH2,NR1H4,PEX2,RASSF1,STK11,TRIM24
Renal Dilation	1.08E-01-1E00	AQP2,EGFR,PRKCSH
Biliary Hyperplasia	1.17E-01-5.26E-01	CCND1,CLK1,GPBAR1,HDAC6,KITLG,MET,MKI67,NF2,NR1H4,SLCO1B3,TGFB2,WWC1
Renal Destruction	1.17E-01-1.17E-01	THY1
Renal Lysis	1.17E-01-1.17E-01	THY1
Increased Levels of LDH	1.36E-01-3.87E-01	CPB2,EGLN1,FOXM1,ITGB2,LDHA,SMARCD3,SYVN1,XDH
Cardiac Hemorrhaging	1.49E-01-3.12E-01	TMSB4X,WT1
Decreased Levels of Albumin	1.49E-01-1E00	EGLN1,FCGRT,NTN1,PLD2
Cardiac Degeneration	1.75E-01-5.26E-01	ARNT,LAMA4,PDCD1,SGCD,TXN
Liver Enlargement	1.77E-01-6.31E-01	APC,ARID4B,ATG7,DEPDC5,EIF2A,EWSR1,HGF,NEIL1,NF2,NR1H4,NR2C1,PDCD1,PPARG,SIRPA,SQSTM1,SSTR5,STK11,STK3
Renal Regeneration	1.93E-01-2.2E-01	HGF,THY1
Renal Dysfunction	2.14E-01-2.2E-01	ACTN4,BICC1,CD28,CDKN1A,EGFR,GLIS2,MAGI2,NR1H4,STMN1,TFEB,TLR2,WT1,XDH
Cardiac Hyperplasia/Hyperproliferation	2.2E-01-3.75E-01	DUSP6,KDR,MOV10L1
Renal Degeneration	2.2E-01-1E00	CD36,CLU,GLIS2
Renal Depletion	2.2E-01-2.2E-01	ERN1
Renal Enlargement	2.2E-01-1E00	BAG6,GGPS1,GPC3,MAGI2,RARB,RCBTB1,TFEB
Degeneration of liver	2.21E-01-2.21E-01	EFEMP1,GSK3B,IKBKB,NR1H4,SRSF10,TAB2
Increased Levels of Albumin	2.85E-01-5.25E-01	CD36,DPP4,FCGRT,STAT3
Increased Levels of Bilirubin	2.86E-01-2.86E-01	CCK,NR1H4,SLC10A2
Decreased Levels of Potassium	2.94E-01-2.94E-01	ARHGEF6,CLDN7,NEDD4L,SLC2A9,WNK1
Cardiac Stress Response	3.12E-01-3.12E-01	TXN
Liver Hyperbilirubinemia	3.12E-01-1E00	ALPL,MTHFR,SLCO1B3
Decreased Levels of Hematocrit	3.3E-01-3.3E-01	EGLN1,FBXL5
Bradycardia	3.49E-01-1E00	ADRA2B,ADRB3,AR,CYBB,HCN4,PPARG,RGS6,ZMPSTE24
Glutathione Depletion In Liver	3.63E-01-1E00	CTH,DUSP10,IKBKB,MET,SLC7A11,XDH
Liver Hematopoiesis	3.63E-01-1E00	CIAPIN1,MDM4,SOCS3,XBP1
Increased Levels of AST	3.67E-01-3.67E-01	CD36,FSTL1,FUNDC1,MAP3K8,SIRT4
Liver Adhesion	5.26E-01-5.26E-01	KRT8
Cardiac Thrombosis	5.74E-01-5.74E-01	E2F3,mir-133 (includes others)
Cardiac Pulmonary Embolism	1E00-1E00	HMGCR,MAGI1,PLCG2,PROS1,XPR1
Increased Levels of Blood Urea Nitrogen	1E00-1E00	C4a/C4b,TFEB
Increased Levels of Creatinine	1E00-1E00	LRRK2
Increased Levels of Potassium	1E00-1E00	SLC26A4
Renal Thrombosis	1E00-1E00	TLR2
Renal Transformation	1E00-1E00	WT1

## Sheet: PBMC
Supplementary Table S5: Overrepresented physiological functions related to DMP-associated genes in PBMC samples
Category	p-value	Molecules
Liver Hyperplasia/Hyperproliferation	3.3E-33-5.81E-01	ABCA13,ABCG1,ABI3,ABL1,ACAD9,ACOX1,ACOXL,ACSL3,ACSM3,ACVR2A,ADAMTS13,ADAMTS5,ADCY10,ADCYAP1,ADGRB1,ADGRB3,ADGRF1,ADGRF3,ADGRG1,ADGRG4,ADGRL2,ADK,ADPGK,AFDN,AFF1,AFF2,AGBL4,AGO2,AGPS,AGXT2,AHI1,AK9,AKAP13,ALAD,ALDH1L1,ALDH2,AMER3,ANK2,ANKRD17,ANKRD50,ANKS1A,ARHGAP32,ARHGAP8,ARHGEF28,ARID1B,ARID5B,ASIC4,ASPH,ATG9B,ATL2,ATOH8,ATP1B4,ATP2B2,ATRX,ATXN7L3B,B4GALT5,BCAR1,BCAS3,BCAT1,BCL2,BCL2L11,BCL9,BE…
Cardiac Arteriopathy	2.89E-13-5.18E-01	ABCG1,ABL1,ADK,ADRA1B,AGBL2,AKAP13,ALDH2,ANKS1A,ARHGAP15,ARID5B,ASIC4,BCAS3,BET1L,CACNA1C,CACNB4,CAPN9,CCM2,CDC123,CDH9,CMIP,CUX2,DOCK8,DPP6,EGFLAM,ESR1,FBN1,FNDC1,FRY,FSTL5,GABRA3,GALNT2,HDAC9,HNF4A,IGF1R,IGF2BP2,IGFBP3,ITGB2,KCNG2,KCNJ12,KDR,KIF1A,LIPA,LRP1,LRP6,MAP3K5,MAP3K7CL,MAST4,MICAL3,mir-221 (includes others),MRAS,MSI2,MSRA,MTHFD1L,MTSS1,MYH11,NLRP3,NOTCH1,NR3C1,NSG1,OPRK1,PDE3A,PDE4D,PL…
Cardiac Enlargement	8.78E-13-4.46E-01	ABL1,ADCY10,ADCY6,ADGRG1,ADK,ADRA1B,AGO2,AKAP13,AKAP5,ANK2,ANKRD1,APLNR,BCL2,BMX,CACNA1C,CACNB4,CASZ1,CDH2,CIITA,CMKLR1,CXCL12,CYP19A1,DPP6,EGFR,EP300,ERG,ESR1,FBN1,FBN2,FGF9,HCK,HDAC4,HDAC9,HIF1A,IGF1R,IL23A,IRX4,ITPR1,KCTD16,MAP3K5,MAP3K7CL,MAPKAPK2,MB,MBNL1,MEF2C,mir-10 (includes others),mir-181 (includes others),mir-221 (includes others),MME,Morrbid,MRAS,MYH10,MYH11,MYH6,NEDD4L,NFATC1,NFATC3,…
Congenital Heart Anomaly	3.79E-12-3.64E-01	ABL1,ACVR2A,ACVR2B,ADGRL2,ADRA1B,ANK2,ANKRD1,BCAS3,BCL9,BMP2,BMP7,CACNA1C,CASZ1,CCBE1,Ccl8,CCM2,CDH2,CFC1,CORO2B,CXCL12,DNAH11,ETS1,FBLN1,FBN1,FOXP1,GPC5,IRX4,KDR,LRP1,MEF2C,MME,MTX2,MYH10,MYH11,MYH6,NCOR2,NFATC1,NGB,NOTCH1,NR3C1,NTF3,PRDM1,PRICKLE1,PRKACB,PRKAR1B,PTPN13,RARA,RBFOX2,RERE,ROBO1,RXRA,SALL4,SCN10A,SNAI1,SOX11,TCF21,TUBB
Cardiac Arrythmia	4.21E-12-6.22E-01	ADRA1B,AGBL4,AK9,ALDH2,AMPD3,ANK2,ANKRD1,ANKRD17,AOPEP,ASPH,BCAS3,BCL9,CACNA1C,CACNB4,CASZ1,CDH2,CMIP,CNTN5,COL5A1,CUX1,CUX2,DNAJC12,DNMT3A,DPP6,EP300,ESR1,FBN1,FGFR2,FILIP1,GABRA3,HMGA2,HOXC4,HRH1,HS1BP3,IGF1R,IKZF3,KCNG2,KCNIP2,KCNJ12,KCNJ16,KLF3,MAP3K7CL,MYH11,MYH6,NAV2,NCOR2,NEDD4L,NEURL1,NFATC1,NR3C1,PDE4D,PITPNC1,PKIB,PLEC,PLPP3,PPARG,PRKCA,PRKCH,PRRX1,PTPN13,PXN,RAB1A,RBPMS,RPLP1,RREB1,SCM…
Hepatocellular carcinoma	4.27E-12-5.18E-01	ABCA13,ABL1,ACOX1,ACOXL,ACSL3,ACSM3,ADCY10,ADGRB1,ADGRF1,ADGRG1,ADGRG4,ADK,ADPGK,AFDN,AGO2,AGPS,AGXT2,AKAP13,ALAD,ALDH2,ARID1B,ASPH,ATP2B2,BCAT1,BCL2,BCL2L11,BMP7,CACNB4,CDH2,CDH9,CHST11,CLRN3,COL5A1,CSMD1,CUEDC2,CXCL12,CYB5A,DCC,DENND4B,DGKI,DNAJC12,DPP6,DRP2,DSCAML1,EEF1A1,EFNA5,EGFLAM,EGFR,EIF3H,EP300,EPHA8,EPS15L1,ESR1,ETS1,F5,FAT1,FBLN1,FBP1,FFAR2,FGF9,FGFR2,FGGY,FILIP1,FNDC1,FRY,FZD8,GAB2,G…
Liver Steatosis	6.06E-12-6.71E-02	ACOX1,ACVR1C,ACVR2B,ADCYAP1,ADK,ADRA1B,AGO2,ALDH2,ARHGEF19,BBS2,BCAT1,BCL2,BHLHE40,CNR2,COL13A1,CYP19A1,DNAJC12,EGFR,ESR1,FANCC,FBP1,FGFR2,GABRA3,GALNT2,GGT1,HNF4A,HRH1,HTR1A,ID1,IGF1R,IL11RA,IL17RC,ITGB2,ITPR1,KIAA1549,KSR1,LBP,LGALS9,LIPA,LRP6,MAP3K5,MGAT4A,MICAL3,mir-221 (includes others),MRAS,MST1R,NCAM2,NEDD4L,NR1H4,NR3C1,OMA1,PC,PCK1,PDE3A,PDE4D,PLAU,PPARG,PRKN,PRLH,PTEN,RAPGEFL1,RCAN1,RORA…
Cardiac Infarction	4.72E-09-6.22E-01	ABI3,ADAMTS13,ADRA1B,ALDH2,ARHGAP15,ARHGAP25,BCAS3,BCL2,CACNA1C,CCM2,CNIH3,CUX2,CXCL12,ESR1,HDAC4,HIF1A,HRH1,IGF1R,IL1A,ITGB2,JDP2,KALRN,KCNG2,KCNJ12,LCK,LIPA,LRP1,MAPKAPK2,MB,MME,MRAS,MST1R,NGFR,NOL3,OPRK1,PADI4,PDE3A,PDE4D,PLEKHG1,PLPP3,PPARG,PRKCE,PRKCH,PSMA6,PTPN6,RORA,RSPH6A,S100A9,SASH1,SHROOM3,SMAD3,SPI1,TDRKH,TENM3,TSHR,TUBB
Renal Necrosis/Cell Death	1.18E-08-3.37E-01	ADK,ATP2B2,BCL2,BCL2L11,CACNA1C,DAPK1,DCC,ECEL1,EEF1A1,EGFR,FAT1,FYN,GNA13,GPR39,GRIN2B,HIF1A,HIP1,HK2,HMGA2,HNF4A,HSP90B1,HSPB1,HTT,IGF1R,IGFBP3,ITPR1,LRP5,LRP6,LRRK2,MAP3K5,mir-181 (includes others),Mt1,NGFR,NLRP3,NOL3,NR1H4,PAK1,PLA2G4A,PLAU,PPARG,PRKCA,PRKCE,PTEN,PTGIS,PTPN6,RASSF4,RCAN1,RUNX3,SLK,SMAD3,ST6GAL1,TCF4,TFEB,TMEFF2,TNFAIP2,TNFAIP3,TNFRSF10B,TNFRSF19,TRADD,TRPS1,TSHR,XBP1,ZMYND11
Renal Inflammation	3.61E-08-1E00	ACOXL,ADAMTS13,ADAMTS5,ADGRL2,APOA4,BCL2,BCL2L11,BTK,CACNA1C,CYP19A1,DNAH11,EGFR,EP300,ESR1,FGR,FYN,HDAC4,HIF1A,HORMAD2,HRH1,IGF2BP2,IKZF3,IRF5,KDR,LRRK2,MAPKAPK2,mir-10 (includes others),Mt1,MYH10,NCOR2,NLRP3,NR3C1,OSBPL10,PADI4,PDE3A,PDE4D,PLA2R1,PPARG,PRKN,PSD3,PTPN6,RABGAP1L,ROBO2,RREB1,RXRA,SMAD3,SNAI1,ST6GAL1,TCF4,TCF7,THSD4,TLR7,TNFAIP3,TP63,TRMT9B
Renal Nephritis	3.61E-08-1E00	ACOXL,ADAMTS13,ADAMTS5,ADGRL2,APOA4,BCL2,BCL2L11,BTK,CACNA1C,CYP19A1,DNAH11,EGFR,EP300,ESR1,FGR,FYN,HDAC4,HIF1A,HORMAD2,HRH1,IGF2BP2,IKZF3,IRF5,KDR,LRRK2,MAPKAPK2,mir-10 (includes others),Mt1,MYH10,NCOR2,NLRP3,NR3C1,OSBPL10,PADI4,PDE3A,PDE4D,PLA2R1,PPARG,PRKN,PSD3,PTPN6,RABGAP1L,ROBO2,RREB1,RXRA,SMAD3,SNAI1,ST6GAL1,TCF4,TCF7,THSD4,TLR7,TNFAIP3,TP63,TRMT9B
Liver Inflammation/Hepatitis	7.22E-08-3.24E-01	ACOX1,ADAMTS13,ADK,CACNA1C,CNR2,CSMD1,DNAJC12,EGFR,ESR1,FANCC,GABBR2,GABRA3,HBA2,HIF1A,HLA-A,HSP90B1,IFNB1,IGF1R,IL1A,IL23A,ITGB2,KSR1,LGALS9,LIPA,LRP6,MAP3K5,mir-10 (includes others),mir-221 (includes others),MRAS,NAV2,NLRP3,NOTCH1,NR1H4,NR3C1,OPRK1,PCK1,PDE3A,PDE4D,PLAU,PPARG,PRDM1,PRKN,PSD3,PTEN,RARA,RORC,RPTOR,RXRA,SPI1,STAM,STAT1,TCF4,TLR7,TNFAIP3,TNFRSF10B,XBP1
Heart Failure	1.26E-07-4.83E-01	2500002B13Rik,ADRA1B,AGBL2,AGO2,ANK2,AOPEP,ARID5B,ASIC4,CACNA1C,CACNB4,CASZ1,CMIP,CXCL12,DPP6,EGFR,EP300,FOXN3,FOXP1,GAB2,GABRA3,GLIS3,HTT,IGSF1,IL1A,KCNG2,KCNJ12,MAP3K7CL,MB,MME,MYH10,MYH11,MYH6,NEDD4L,NR3C1,PDE3A,PDE4D,PLAU,PLPP3,PPARG,PPP2R1A,PRKCA,PROM1,PTPA,RGS10,RSPH6A,RXRA,SLC14A2,THSD4,TSHR,TUBB
Glomerular Injury	2.06E-06-1E00	ABL1,ACOXL,ADAMTS5,ADGRL2,ARHGAP32,BCL2,BCL2L11,BHLHE40,BMP7,BTK,CACNA1C,CMIP,DNAH11,EGFR,EP300,ESR1,FAT1,FBLN1,FGR,FYN,GPC5,HDAC4,HDAC9,HIF1A,HMGA2,HNF4A,HORMAD2,HRH1,IKZF3,IL11RA,IL23A,IRF5,LGMN,MAPKAPK2,mir-10 (includes others),MSI1,Mt1,MTSS1,MTX2,MYH10,NCOR2,NLRP3,NR1H4,NR3C1,OSBPL10,PADI4,PDE3A,PDE4D,PFKFB3,PLA2G4A,PLA2R1,PLAU,PPARG,PRKCE,PRKN,PSD3,PTGIS,PTPN6,RABGAP1L,RCAN1,ROBO2,RORC,RREB1…
Liver Necrosis/Cell Death	2.26E-06-5.51E-01	ABL1,ALDH2,BCL2,BCL2L11,EGFR,ESR1,GOT2,HK2,HNF4A,IRF5,ITGB2,LRP1,MAP3K5,MEG3,MME,Mt1,NGFR,NR1H4,PRKAA2,RXRA,SELENOP,SH3BP5,SIGIRR,SMAD3,SOX6,STAT1,STAT5B,TLR7,TNFRSF10B,TRADD,USP2,XBP1,YES1
Cardiac Proliferation	2.94E-06-4.58E-01	CASZ1,CCBE1,CXCL12,EGFR,FGF9,FGFR2,FOXP1,HOXB13,ITGB2,MEF2C,mir-329 (includes others),MYH10,NOTCH1,P2RY6,PRKCA,PTEN,RAB1A,RARA,RXRA,STAT1,TENM4
Liver Proliferation	4.06E-06-1E00	BCL2,BMP7,CXCL12,EGFR,ERG,FGFR2,HNF4A,ID1,IGF1R,ITPR1,mir-221 (includes others),Mt1,NFATC3,NGFR,NR1H4,PLAU,PPARG,PTEN,PTPN6,RARA,RXRA,SMAD3,SOX6,SPI1,STAT1,STAT5B,TNFAIP3,XBP1
Renal Fibrosis	8.44E-06-9.12E-02	BMP7,EGFR,ESR1,HDAC9,HIF1A,IL11RA,IL23A,LGMN,MSI1,Mt1,MTSS1,NR1H4,NR3C1,PFKFB3,PLA2G4A,PRKN,PTGIS,RCAN1,RORC,SMAD3,SNAI1,TFEB
Liver Fibrosis	1.37E-05-5.95E-01	ACOX1,ADK,ADRA1B,ARHGAP31,BMP7,CXCL12,DNMT3A,ERG,ETS1,FGFR2,FOXN3,GRIN2B,HNF4A,HRH1,HSPB1,IKZF3,IL11RA,IL12A,IL1A,IL23A,IRF5,KLF3,LBP,LRP1,LRP6,mir-10 (includes others),mir-221 (includes others),Mt1,MYH10,NLRP3,NOTCH1,NR1H4,NR3C1,PCK1,PKHD1,PLA2G4A,PLAGL1,PLAU,PPARG,PRKN,PTEN,PTPN6,RORA,RORC,RUNX3,SLC51A,SMAD3,SNAI1,SPI1,STAT1,WDFY4,XBP1
Cardiac Dysfunction	1.54E-05-5.65E-01	ADAMTS5,ADRA1B,ALDH2,AMPD3,ANK2,ANKRD1,APOA4,BMX,CACNA1C,CACNB4,CNR2,EGFR,EP300,EPB41L2,ESR1,ETS1,FGF9,GNG12,HDAC9,HIF1A,HOXB13,HTT,IRX4,ITGB2,ITPR1,KCTD16,LRP5,MAP3K5,MAP3K7CL,MAPKAPK2,MB,MBNL1,MEF2C,METAP1,MME,Morrbid,MYH10,MYH11,MYH6,NOL3,NOTCH1,NR3C1,PLAU,PRKAA2,PRKCA,PSAP,RCAN1,RGS10,RPLP1,RXRA,S100A9,SOX6,TUBB,WNT7A
Renal Hypoplasia	4.44E-05-1.3E-01	ACVR2B,BCL2,BMP7,DCC,HOXD11,RARA,RERE,SALL4,SRGAP1,SYN3,TCF21,TRAP1
Liver Cirrhosis	6.37E-05-3.64E-01	ADK,ADRA1B,ALDH2,ARHGAP31,DNMT3A,ESR1,F5,FBLN1,GABRA3,GGT1,GRIN2B,HDAC9,HNF4A,HRH1,IKZF3,IL12A,IL1A,IL23A,IRF5,KLF3,mir-10 (includes others),mir-181 (includes others),mir-221 (includes others),NLRP3,NOTCH1,NR1H4,NR3C1,OPRK1,PDE3A,PDE4D,PPARG,RUNX3,SLC51A,WDFY4,XBP1
Pulmonary Hypertension	7.14E-05-5.01E-01	ABL1,ADGRF1,ADRA1B,BPIFB1,CMKLR1,ERG,FBN1,HBA2,IGFBP3,KDR,LRP6,MME,MTX2,NOTCH1,PDE3A,PDE4D,PFKFB3,PPARG,ROBO2,RPTOR,S100A9,SCN10A,SNAI1,TBX4,WNT7A
Cardiac Dilation	1.07E-04-4.46E-01	ADRA1B,ANK2,ANKRD1,APLNR,CACNA1C,CACNB4,CASZ1,CDH2,CIITA,DPP6,EP300,ESR1,FBN1,FBN2,FGF9,GAB2,IGF1R,IL23A,IRX4,MAP3K5,MAP3K7CL,mir-10 (includes others),mir-181 (includes others),mir-221 (includes others),MYH11,MYH6,NEDD4L,NOL3,NOTCH1,PLAU,PLEC,PRKCA,PRKN,PROM1,RCAN1,RGS10,RNF220,RXRA,TFEB,WWOX
Renal Damage	1.21E-04-1.81E-01	ABL1,ACSM3,ADAMTS13,ADRA1B,ALDH2,BMP7,COL5A1,FBN1,FGR,GC,GGT1,GPC5,HCK,HIF1A,HSPB1,IGFBP3,IL23A,Kng2,LRP5,LRP6,LRRK2,MME,NLRP3,NOD1,PDE3A,PDE4D,PPARG,PRKCZ,SIGIRR,Slco1a5,SMAD3,ST6GAL1,TFEB,TLR7,TNFRSF10B
Cardiac Damage	3.3E-04-4.06E-01	Acot1,ADRA1B,ALDH2,ANK2,ANKRD1,APLNR,BCL2,CACNA1C,CNR2,ESR1,FGR,HSP90B1,IL1A,MAP3K5,MME,MYH6,NR3C1,NREP,PLAU,PRKAA2
Increased Levels of Alkaline Phosphatase	3.3E-04-5.78E-04	BMP2,BMP7,CNR2,DLX5,DNMT3A,ESR1,LRRK1,MEF2C,NOTCH1,SMAD3,TNFRSF19
Renal Proliferation	3.66E-04-1.6E-01	AKAP13,BCL2,CDO1,CHKA,DAPK1,EGFR,ESR1,FBN2,FFAR2,HMGA2,HNF4A,HOXB13,ITPR1,Mt1,NLRP3,NPSR1,PC,PFKFB3,PLAU,PPP2R1A,PRKCZ,PTEN,RXRA,SALL4,SERPINB7,SLK,TMEFF2,TPM2,TRADD
Liver Enlargement	5.32E-04-2.43E-01	CUX1,CYP19A1,ESR1,FBP1,LIPA,Mt1,NR1H4,PKHD1,PPARG,PTEN,RXRA,STAT1,STAT5B
Liver Damage	1.13E-03-1E00	ALDH2,CNR2,FGR,HCK,HLA-A,HNF4A,IGF1R,IL1A,ITGB2,LBP,LRRK2,Mt1,NLRP3,NR1H4,NR3C1,PCK1,PLAU,PRKCZ,PRKN,PTEN,SH3BP5,STAT1,TNFAIP3,XBP1
Cardiac Inflammation	2.27E-03-1E00	EFHC1,IFNB1,IL1A,IL23A,ITGB2,MAP3K5,MME,MYH6,NR3C1,RXRA,TLR7,TUBB
Renal Atrophy	2.58E-03-3.41E-01	EGFR,LGMN,LRRK2,Mt1,PTGIS,TCF21,TFEB
Kidney Failure	2.73E-03-4.65E-01	ADK,ADRA1B,BCL2,CACNA1C,EGFR,ETS1,F5,GABRA3,HDAC9,HRH1,LGMN,MSI1,Mt1,NFATC1,NR1H4,NR3C1,PADI4,PDE3A,PDE4D,PKHD1,PPARG,RCAN1,SIGIRR,SMAD3,TFEB
Cardiac Necrosis/Cell Death	3.02E-03-1E00	Acot1,ADAMTS13,ADCY6,BCL2,BCL2L11,CNR2,CXCL12,HIF1A,HK2,HSPB1,IVNS1ABP,LRP1,MAP3K5,MAPKAPK2,mir-181 (includes others),MYH6,NOL3,NOTCH1,PADI4,PDE4D,PRKAA2,PRKN,PTEN,SH3BP5,STAT1,TNFAIP3
Cardiac Fibrosis	3.56E-03-6.35E-01	CACNA1C,CNR2,EP300,ETS1,IGF1R,IL11RA,MAP3K5,MB,MBNL1,mir-10 (includes others),MME,MYH6,NLRP3,NOL3,PADI4,PAK1,PLA2G4A,PLAU,RERE,RGS10,SLC14A2,SMAD3,SNAI1,STAT1,TFEB,TNFAIP3
Renal Enlargement	5.96E-03-2.43E-01	BCL2,DEPTOR,ESR1,Mt1,NFATC3,PKHD1,RARA,TFEB
Biliary Hyperplasia	6.68E-03-5.95E-01	NR1H4,PKHD1,PTEN,SNAI1
Increased Levels of Blood Urea Nitrogen	7.2E-03-7.2E-03	Cd209a,PADI4,SLC14A2,SMAD3,TFEB
Cardiac Hypoplasia	8.1E-03-2.21E-02	ANKRD17,CASZ1,MEF2C,NFATC3,NOTCH1,RXRA,SOX11
Renal Tubule Injury	1.12E-02-1.6E-01	ACSM3,ADAMTS13,COL5A1,FBN1,HSPB1,IGFBP3,Kng2,PRKCZ,SIGIRR,Slco1a5,ST6GAL1,TFEB,TLR7
Cardiac Congestive Cardiac Failure	1.23E-02-1.23E-02	ADRA1B,ASIC4,CACNA1C,KCNG2,KCNJ12,MB,MME,MYH10,NR3C1,PDE3A,PDE4D,PPARG,RXRA
Liver Regeneration	1.31E-02-2.43E-01	ACOX1,CNR2,EGFR,ITPR1,Mt1,NFATC3,NR1H4,PLAU,UPF2
Liver Hematopoiesis	1.6E-02-4.27E-01	ERG,XBP1
Renal Dysplasia	1.6E-02-1.6E-02	SRGAP1,TRAP1
Tachycardia	1.83E-02-5.35E-01	ADRA1B,ANK2,ASPH,CACNA1C,CACNB4,KCNG2,KCNJ12,MAP3K7CL,PPARG,TSHR
Nephrosis	2.53E-02-2.73E-01	AHI1,ASIC4,BMP7,CMIP,DOCK8,FAT1,GLIS3,GPC5,HRH1,KALRN,MTX2,NR3C1,PDE3A,PDE4D,RMND1,SRGAP1
Hepatocellular Peroxisome Proliferation	3.42E-02-3.64E-01	ACOX1,ACSL3,NR1H4,PTEN
Liver Cholestasis	3.42E-02-1E00	ABCG1,ESR1,GGT1,HNF4A,LBP,LIPA,mir-10 (includes others),NLRP3,NR1H4,SHROOM3,SLC51A,TNFRSF10B,VPS50
Renal Degradation	3.42E-02-3.42E-02	PSAP
Renal Hyperplasia/Hyperproliferation	3.42E-02-3.42E-02	LGMN
Increased Levels of Creatinine	3.85E-02-4.27E-01	ADCY6,ARHGAP15,GAMT,LRRK2,SMAD3,TNFAIP2
Cardiac Stenosis	4.37E-02-1E00	GABRA3,KDR,MYH11,NTF3,RXRA
Renal Degeneration	5.77E-02-9.9E-02	BCL2,Mt1,MTSS1
Increased Levels of LDH	6.26E-02-1.36E-01	IL1A,ITGB2,NLRP3,TRAP1
Increased Levels of Red Blood Cells	6.26E-02-6.26E-02	FANCC,ID1,LGMN,PPP1R15B,RAPGEF2,SALL4,SOX6,STAT5B
Renal Hydronephrosis	6.3E-02-6.3E-02	ADRA1B,IGF1R,LGMN,MYH11,NTF3,PSAP,RARA
Cardiac Hyperplasia/Hyperproliferation	6.71E-02-3.18E-01	ABL1,KDR
Increased Levels of Hematocrit	6.83E-02-6.83E-02	ADD3,CCBE1,FBLN1,LGMN,MUC13,PPP1R15B,SPI1
Dysfunction of liver	9.12E-02-9.12E-02	HTT,STAT5B
Cardiac Pulmonary Embolism	9.6E-02-3.18E-01	F5,MAP3K5,MB,TSPAN15
Degeneration of liver	1.16E-01-1.16E-01	ESR1,Mt1,NR1H4
Increased Levels of Albumin	1.6E-01-1.6E-01	HNF4A
Cardiac Transformation	1.88E-01-1.88E-01	BMP2
Liver Adhesion	1.88E-01-1.88E-01	SMAD3
Liver Failure	2.06E-01-3.37E-01	ADRA1B,HRH1,IL23A,mir-10 (includes others),NLRP3,OPRK1
Glutathione Depletion In Liver	2.22E-01-4.27E-01	ACOX1,ALDH1L1,RXRA
Increased Levels of ALT	2.69E-01-4.8E-01	APOA4,ITGB2,NLRP3
Decreased Levels of Potassium	2.86E-01-2.86E-01	ARHGEF6,NEDD4L
Renal Transformation	2.94E-01-2.94E-01	NOTCH1
Renal Dysfunction	3.46E-01-3.46E-01	BCL2,EGFR,NR1H4,TFEB
Decreased Levels of Albumin	3.64E-01-3.64E-01	CNR2
Renal Dilation	3.64E-01-3.64E-01	EGFR
Increased Levels of Bilirubin	4.27E-01-4.27E-01	NR1H4
Increased Levels of Potassium	4.65E-01-4.65E-01	ADCY6
Liver Hypoplasia	4.91E-01-4.91E-01	SMAD3,XBP1
Bradycardia	5.84E-01-5.84E-01	ADRA1B,PPARG
Liver Hemorrhaging	1E00-1E00	Mt1
