# Supplementary material for: Intermittent Hypoxia Mimicking Sleep Apnea Induces Systemic and Tissue Specific Epigenetic Changes and p16-Mediated Cellular Senescence Underlying Vascular Dysfunction
Source: Research Square preprint supplement (doi:10.21203/rs.3.rs-9371471/v1), 2026-04-15
Supplement: Supplementary file 2 [file 3944ad8abddd89bcc26515a7.xlsx]

## Sheet: Sheet1
Supplementary Table S3: Chromosomal location distribution of DMPs in left cardiac ventricle and PBMC samples.
Left cardiac ventricle					PBMC
	Higher methylation					Higher methylation
Chromosome	IH	RA	pvalue*		Chromosome	IH	RA	pvalue*
1	19	212	0.7047		1	60	22	0.7073
2	28	290	0.4435		2	79	39	0.3392
3	16	178	0.7822		3	52	21	0.0854
4	17	199	0.8958		4	69	21	0.2309
5	26	198	0.0379		5	51	32	0.0604
6	18	183	0.497		6	57	31	0.2238
7	21	240	0.8106		7	42	28	0.0429
8	7	159	0.1006		8	37	24	0.0827
9	15	180	0.9999		9	54	19	0.5982
10	20	200	0.4348		10	66	11	0.0027
11	21	218	0.5313		11	51	34	0.0261
12	11	165	0.5632		12	27	16	0.2354
13	16	181	0.7846		13	36	10	0.3224
14	14	133	0.4289		14	28	8	0.1798
15	13	145	0.7612		15	42	17	>0.9999
16	7	112	0.5996		16	31	8	0.2842
17	12	159	0.8834		17	45	17	0.8862
18	9	92	0.5735		18	34	5	0.0204
19	8	103	>0.9999		19	30	8	0.3644
X	14	359	0.0015		X	30	8	0.3644
Y	0	23	0.253		Y	5	1	0.6783
*: Fisher's Exact Test					*: Fisher's Exact Test
