# Supplementary material for: Intermittent Hypoxia Mimicking Sleep Apnea Induces Systemic and Tissue Specific Epigenetic Changes and p16-Mediated Cellular Senescence Underlying Vascular Dysfunction
Source: Research Square preprint supplement (doi:10.21203/rs.3.rs-9371471/v1), 2026-04-15
Supplement: Supplementary file 3 [file 4adac8704bc136b43359ac7e.xlsx]

## Sheet: Sheet1
Supplementary Table S2: Differentially Methylated Positions (DMPs) in PBMC samples.
Probe_ID	CGid	SYMBOL	GeneRegionID	logFC	AveExpr	t	P.Value	adj.P.Val	B
cg31129700_TC11	cg31129700	Ppp2r5c	Ppp2r5c_Intergenic_upstream	0.000461315	0.941591	8.58448	3.28351e-10	5.5501e-05	8.09185
cg37449988_TC21	cg37449988	Zp3r	Zp3r_Intron	-0.000385876	0.0680802	-8.35851	6.25702e-10	5.5501e-05	7.43747
cg31944143_TC21	cg31944143	Gcnt4	Gcnt4_Intron	0.000379784	0.887179	8.32121	6.96382e-10	5.5501e-05	7.3289
cg40796098_TC11	cg40796098	Ccl27a	Ccl27a_Intron	0.000236971	0.963347	8.29547	7.49836e-10	5.5501e-05	7.25388
cg46365395_BC21	cg46365395	Irf2bp2	Irf2bp2_Promoter	-0.000348002	0.0581958	-8.19357	1.00566e-09	5.95492e-05	6.95617
cg46840460_BC21	cg46840460	Rplp1	Rplp1_Intergenic_downstream	0.000430459	0.849259	7.98523	1.8396e-09	9.07751e-05	6.34401
cg43766265_TC11	cg43766265	Foxp1	Foxp1_Intron	-0.000433248	0.0731679	-7.85598	2.68226e-09	0.000113448	5.96197
cg43619885_BC11	cg43619885	Rtkn	Rtkn_fiveUTR	-0.000463485	0.113588	-7.75288	3.62847e-09	0.000134285	5.656
cg36819109_TC21	cg36819109	Mgat4a	Mgat4a_Promoter	-0.000333905	0.0972779	-7.63102	5.19343e-09	0.000161737	5.29304
cg39973291_BC11	cg39973291	Lrba	Lrba_Exon	-0.000277357	0.0249211	-7.60605	5.59037e-09	0.000161737	5.21851
cg36326482_BC21	cg36326482	Pten	Pten_Intergenic_downstream	-0.000243394	0.0483417	-7.58159	6.00907e-09	0.000161737	5.14543
cg44922228_TC21	cg44922228	Fchsd2	Fchsd2_Promoter	-0.000376058	0.152121	-7.44756	8.93651e-09	0.000220486	4.74399
cg32950457_BC21	cg32950457	Dct	Dct_Exon	0.000449336	0.815567	7.31866	1.31113e-08	0.000298606	4.35647
cg41978250_BC11	cg41978250	Adgrf3	Adgrf3_Exon	0.000422107	0.955263	7.25024	1.60798e-08	0.000329899	4.15024
cg43387666_TC21	cg43387666	Zfp467	Zfp467_Intron	0.000333255	0.669778	7.22785	1.71922e-08	0.000329899	4.08267
cg43251765_TC21	cg43251765	Irf5	Irf5_fiveUTR	-0.00030312	0.0733649	-7.2157	1.78282e-08	0.000329899	4.04597
cg41803836_TC21	cg41803836	Samd11	Samd11_fiveUTR	-0.000241963	0.0944238	-7.1884	1.93449e-08	0.000336908	3.9635
cg44735340_TC21	cg44735340	Akap13	Akap13_Exon	-0.000287107	0.0644839	-7.12128	2.36524e-08	0.000389042	3.76048
cg29807499_TC21	cg29807499	Ksr1	Ksr1_Intron	-0.000164038	0.0435337	-6.95888	3.85316e-08	0.000600424	3.26792
cg46574226_BC21	cg46574226	Arhgap32	Arhgap32_Promoter	0.000224807	0.920143	6.92734	4.2373e-08	0.000627268	3.17205
cg44509801_TC21	cg44509801	Ptov1	Ptov1_Promoter	-0.000174098	0.0789839	-6.88434	4.82391e-08	0.000680102	3.04128
cg38457117_BC21	cg38457117	Gca	Gca_Intron	0.000407688	0.730749	6.85215	5.31621e-08	0.000691888	2.94328
cg42043313_BC21	cg42043313	Tbc1d14	Tbc1d14_fiveUTR	-0.000300977	0.150383	-6.84852	5.37489e-08	0.000691888	2.93222
cg46448059_BC11	cg46448059	Mre11a	Mre11a_Exon	0.000269626	0.942261	6.83033	5.67843e-08	0.000700506	2.87682
cg31446417_BC21	cg31446417	Ly86	Ly86_Intergenic_downstream	0.000502886	0.848466	6.77489	6.71484e-08	0.000795224	2.70783
cg45928102_TC11	cg45928102	Lyl1	Lyl1_fiveUTR	-0.000231641	0.0338453	-6.72154	7.89193e-08	0.000898678	2.54506
cg45166644_TC11	cg45166644	Fgfr2	Fgfr2_Exon	-0.000248716	0.0561337	-6.61843	1.07898e-07	0.00118316	2.23001
cg29750396_TC21	cg29750396	Zfp735	Zfp735_Promoter	0.000544049	0.446821	6.59366	1.16325e-07	0.00119993	2.15429
cg40796092_BO21	cg40796092	Ccl27a	Ccl27a_Intron	0.000242673	0.797509	6.57789	1.22037e-07	0.00119993	2.10603
cg47731442_BC21	cg47731442	Gabra3	Gabra3_Promoter	-0.000253931	0.247501	-6.56864	1.25516e-07	0.00119993	2.07773
cg48167880_TC11	cg48167880	Reps2	Reps2_Exon	0.00034306	0.914646	6.56832	1.25638e-07	0.00119993	2.07675
cg30286598_BC21	cg30286598	2900052L18Rik	2900052L18Rik_Exon	-0.000408485	0.132585	-6.54709	1.34014e-07	0.00123947	2.01179
cg44190988_BC11	cg44190988	Eps8l1	Eps8l1_threeUTR	-0.000492915	0.371008	-6.53709	1.38152e-07	0.00123947	1.98118
cg29373293_TC21	cg29373293	D630024D03Rik	D630024D03Rik_Intergenic_upstream	0.000506076	0.792336	6.50309	1.53208e-07	0.00133413	1.87707
cg39079708_BC11	cg39079708	Nkx2-2	Nkx2-2_threeUTR	-0.000269507	0.0616047	-6.49226	1.58344e-07	0.00133436	1.8439
cg28579362_TC21	cg28579362	1110002J07Rik	1110002J07Rik_Exon	-0.000164049	0.0373447	-6.48426	1.62248e-07	0.00133436	1.81939
cg42480526_TC11	cg42480526	Plac8	Plac8_Intron	-0.000159682	0.0260497	-6.46659	1.71217e-07	0.00137006	1.76525
cg42575784_TC21	cg42575784	Galnt9	Galnt9_Intron	0.000317621	0.739874	6.43178	1.90373e-07	0.00148103	1.65857
cg32642682_TC21	cg32642682	Tnfrsf10b	Tnfrsf10b_Intron	-0.000193636	0.0296705	-6.42375	1.95089e-07	0.00148103	1.63396
cg28849456_BC11	cg28849456	Elk3	Elk3_Intron	0.000434517	0.808512	6.37534	2.26121e-07	0.00167076	1.48551
cg42231765_BC11	cg42231765	Rbm47	Rbm47_fiveUTR	-0.000225803	0.0384851	-6.36254	2.35131e-07	0.00167076	1.44623
cg38514424_TC21	cg38514424	Gad1os	Gad1os_Promoter	-0.000275754	0.134557	-6.35993	2.37012e-07	0.00167076	1.43822
cg43585410_BC21	cg43585410	Ctnna2	Ctnna2_fiveUTR	-0.000227244	0.0953806	-6.32853	2.60847e-07	0.00179603	1.34189
cg45166643_BC11	cg45166643	Fgfr2	Fgfr2_fiveUTR	-0.00040057	0.0901558	-6.31211	2.74254e-07	0.0018285	1.29152
cg28367849_TC21	cg28367849	Fyn	Fyn_Intron	0.000365942	0.888867	6.30589	2.79517e-07	0.0018285	1.27242
cg29787600_TC21	cg29787600	Ssh2	Ssh2_Intron	-0.00016997	0.0409978	-6.30057	2.84092e-07	0.0018285	1.2561
cg44190878_TC11	cg44190878	Eps8l1	Eps8l1_threeUTR	-0.000545882	0.274349	-6.28046	3.02094e-07	0.001903	1.19436
cg28635317_BC21	cg28635317	1700049L16Rik	1700049L16Rik_Promoter	0.000410914	0.727428	6.27004	3.11866e-07	0.0019219	1.16237
cg36921459_BC21	cg36921459	Stat1	Stat1_Intron	0.000230677	0.887989	6.26037	3.21221e-07	0.0019219	1.13268
cg34783768_TC21	cg34783768	Anks1	Anks1_fiveUTR	-0.000272467	0.0409231	-6.25697	3.24569e-07	0.0019219	1.12226
cg46595433_BC11	cg46595433	St3gal4	St3gal4_fiveUTR	0.000358055	0.774461	6.23536	3.4674e-07	0.00201293	1.05588
cg43454991_BC11	cg43454991	Nod1	Nod1_Intron	0.000330945	0.909459	6.21132	3.73184e-07	0.00212478	0.982059
cg35386240_TC21	cg35386240	Gm10556	Gm10556_Intergenic_upstream	0.000271713	0.648205	6.20255	3.83322e-07	0.00214132	0.95514
cg46769033_BC21	cg46769033	Sh2d7	Sh2d7_threeUTR	0.000304062	0.905862	6.19456	3.92812e-07	0.0021537	0.930581
cg38245599_BC11	cg38245599	Fam102a	Fam102a_Intron	-0.000397869	0.141476	-6.1717	4.21268e-07	0.00226772	0.860355
cg39292060_TC21	cg39292060	Ube2v1	Ube2v1_Intron	0.000371619	0.784853	6.16314	4.32444e-07	0.00228632	0.834066
cg44434286_TC21	cg44434286	Nudt19	Nudt19_Intron	0.000302166	0.858198	6.15014	4.49999e-07	0.0023216	0.794118
cg36476972_TC11	cg36476972	Slk	Slk_Intergenic_upstream	0.000624311	0.84088	6.1421	4.61202e-07	0.0023216	0.769431
cg38475369_TC21	cg38475369	Scn2a	Scn2a_Intron	0.000267372	0.545571	6.14108	4.62642e-07	0.0023216	0.766303
cg39258365_TC21	cg39258365	Slc35c2	Slc35c2_Intron	-0.000321875	0.126551	-6.12567	4.84991e-07	0.00239319	0.718947
cg36068981_TC21	cg36068981	Lrp5	Lrp5_Promoter	0.000321638	0.73061	6.11724	4.97665e-07	0.0024018	0.693058
cg31429907_TC11	cg31429907	1700019C18Rik	1700019C18Rik_Exon	-0.000113934	0.0198412	-6.1084	5.11328e-07	0.0024018	0.665874
cg35250318_BC11	cg35250318	Hnrnpll	Hnrnpll_Intergenic_downstream	-0.000159336	0.0432372	-6.10633	5.14576e-07	0.0024018	0.659521
cg41718321_TC21	cg41718321	Rere	Rere_Intron	-0.000216408	0.0522402	-6.10011	5.24464e-07	0.0024018	0.64042
cg46802729_BC21	cg46802729	Cyp11a1	Cyp11a1_Exon	-0.000662521	0.190681	-6.09835	5.27297e-07	0.0024018	0.635014
cg33999926_BC21	cg33999926	Igf2bp2	Igf2bp2_Exon	-0.000206471	0.0668794	-6.06545	5.832e-07	0.00252876	0.533907
cg37905695_BC21	cg37905695	Gm2061	Gm2061_Promoter	-0.000186344	0.105974	-6.06531	5.83451e-07	0.00252876	0.533476
cg39973297_BC21	cg39973297	Lrba	Lrba_Exon	-0.000390673	0.0785653	-6.06423	5.85379e-07	0.00252876	0.530165
cg46522868_BC11	cg46522868	E130101E03Rik	E130101E03Rik_Intergenic_upstream	0.000291314	0.817641	6.06204	5.89334e-07	0.00252876	0.52341
cg37417615_TC11	cg37417615	Lypd1	Lypd1_Promoter	-0.000127872	0.018245	-6.0466	6.17868e-07	0.0025857	0.47598
cg42648828_TC21	cg42648828	Pxn	Pxn_Intron	-0.000238698	0.155568	-6.04544	6.20072e-07	0.0025857	0.472407
cg28415771_TC21	cg28415771	4933404K13Rik	4933404K13Rik_Promoter	0.000244453	0.884629	6.01518	6.8031e-07	0.00277809	0.379419
cg37598502_TC21	cg37598502	Ivns1abp	Ivns1abp_Intergenic_upstream	-0.000152898	0.0538981	-6.01295	6.84976e-07	0.00277809	0.372564
cg45188278_TC11	cg45188278	Fgfr2	Fgfr2_Intron	0.000108306	0.988832	5.99782	7.17498e-07	0.00283014	0.326048
cg38385215_BC21	cg38385215	Cacnb4	Cacnb4_Intron	-0.000300945	0.133288	-5.99435	7.25167e-07	0.00283014	0.315387
cg48138919_BC21	cg48138919	Sms	Sms_Intron	0.000358978	0.905673	5.99376	7.26487e-07	0.00283014	0.313564
cg31200308_BC21	cg31200308	Cdca7l	Cdca7l_Intron	0.000332525	0.746384	5.97766	7.6323e-07	0.00293467	0.264096
cg42043309_BC21	cg42043309	Tbc1d14	Tbc1d14_fiveUTR	-0.000422206	0.117838	-5.9668	7.89081e-07	0.00297064	0.230701
cg28424238_BC21	cg28424238	Prdm1	Prdm1_Exon	0.000297491	0.888452	5.96532	7.92653e-07	0.00297064	0.226174
cg43618892_TC11	cg43618892	Lbx2	Lbx2_fiveUTR	-0.000232531	0.0582477	-5.95626	8.14978e-07	0.00301613	0.198331
cg35864593_TC21	cg35864593	Seh1l	Seh1l_Intergenic_upstream	0.000264901	0.667381	5.91864	9.14657e-07	0.0033055	0.0826846
cg43494623_TC21	cg43494623	Ccser1	Ccser1_Intron	0.000305881	0.821994	5.91834	9.15496e-07	0.0033055	0.0817655
cg45583495_BC11	cg45583495	Prag1	Prag1_Intron	-0.000265203	0.052786	-5.88525	1.01327e-06	0.00361331	-0.0199097
cg33999925_BC11	cg33999925	Igf2bp2	Igf2bp2_Exon	-0.000285143	0.0314657	-5.88145	1.02516e-06	0.00361331	-0.0315886
cg30929972_TC21	cg30929972	Ngb	Ngb_Intron	0.000331835	0.510377	5.8614	1.09018e-06	0.00375895	-0.0931938
cg43691803_TC21	cg43691803	Aldh1l1	Aldh1l1_Intron	0.000310433	0.536378	5.8609	1.09187e-06	0.00375895	-0.0947405
cg29377829_BC21	cg29377829	Hba-a1	Hba-a1_Promoter	0.000269162	0.505982	5.83822	1.17056e-06	0.00395417	-0.164439
cg43269497_TC11	cg43269497	2210408F21Rik	2210408F21Rik_Exon	-0.000242811	0.0191218	-5.8341	1.18546e-06	0.00395417	-0.177102
cg43115456_TC11	cg43115456	Dlx5	Dlx5_Exon	-0.000150846	0.018726	-5.83322	1.18864e-06	0.00395417	-0.17979
cg38022783_TC21	cg38022783	Upf2	Upf2_Promoter	0.000242438	0.519038	5.823	1.22653e-06	0.00403488	-0.211209
cg37717170_TC21	cg37717170	Sft2d2	Sft2d2_Intron	-0.000295576	0.121163	-5.81101	1.27249e-06	0.00414007	-0.248042
cg29978826_BC11	cg29978826	Mir10a	Mir10a_Promoter	-0.000212855	0.0502706	-5.80362	1.30165e-06	0.0041889	-0.270721
cg34783764_TC21	cg34783764	Anks1	Anks1_fiveUTR	-0.000175886	0.0869792	-5.79124	1.35206e-06	0.00430435	-0.308761
cg29895071_BC11	cg29895071	Tspoap1	Tspoap1_Exon	-0.000117426	0.0178665	-5.78052	1.39729e-06	0.00436989	-0.341696
cg39079700_TC21	cg39079700	Nkx2-2	Nkx2-2_threeUTR	-0.000234594	0.0687545	-5.77938	1.40217e-06	0.00436989	-0.345185
cg42322006_BC21	cg42322006	C530008M17Rik	C530008M17Rik_fiveUTR	-0.000191621	0.120172	-5.76921	1.44662e-06	0.00446148	-0.376427
cg37678795_TC21	cg37678795	Rabgap1l	Rabgap1l_threeUTR	-0.000234198	0.0727841	-5.75422	1.51476e-06	0.00462345	-0.422485
cg38809277_BC21	cg38809277	Slc12a6	Slc12a6_Intron	-0.000292801	0.297346	-5.74559	1.55542e-06	0.0046991	-0.44899
cg46684034_TC21	cg46684034	Il10ra	Il10ra_Exon	0.00032865	0.820134	5.72886	1.63734e-06	0.00482666	-0.500346
cg44190888_BC21	cg44190888	Eps8l1	Eps8l1_Intron	-0.000682537	0.308571	-5.72863	1.63853e-06	0.00482666	-0.501072
cg46793336_TC21	cg46793336	1700041C23Rik	1700041C23Rik_Promoter	0.000317634	0.608031	5.72704	1.64654e-06	0.00482666	-0.505956
cg32642687_TC21	cg32642687	Tnfrsf10b	Tnfrsf10b_Intron	-0.000233807	0.0525422	-5.71457	1.71078e-06	0.00496578	-0.54424
cg44190779_BC21	cg44190779	Eps8l1	Eps8l1_Promoter	0.000633979	0.583857	5.70423	1.76592e-06	0.00503457	-0.575975
cg45949431_TC21	cg45949431	N4bp1	N4bp1_Exon	-0.000144081	0.0559757	-5.70376	1.76849e-06	0.00503457	-0.577426
cg44191094_TC21	cg44191094	Eps8l1	Eps8l1_threeUTR	-0.000361579	0.342043	-5.69274	1.8293e-06	0.00509491	-0.611244
cg45639093_BC21	cg45639093	Fat1	Fat1_Intron	-0.000499295	0.424721	-5.69106	1.8388e-06	0.00509491	-0.616421
cg47290326_TC21	cg47290326	Clasp2	Clasp2_Intron	-0.000266484	0.0793948	-5.69061	1.84131e-06	0.00509491	-0.617784
cg38245599_BO11	cg38245599	Fam102a	Fam102a_Intron	-0.00031379	0.109835	-5.67799	1.91401e-06	0.00518319	-0.656515
cg34103611_BC21	cg34103611	Itgb5	Itgb5_Intron	0.000237567	0.610793	5.67679	1.9211e-06	0.00518319	-0.660211
cg32001754_BC21	cg32001754	Mast4	Mast4_Intron	0.000364985	0.775319	5.67558	1.92826e-06	0.00518319	-0.66393
cg36814803_BC21	cg36814803	Vwa3b	Vwa3b_Exon	0.000317305	0.71878	5.67141	1.95309e-06	0.00518319	-0.676727
cg37792990_TC21	cg37792990	Olfr1408	Olfr1408_Promoter	0.000205754	0.583379	5.67014	1.96074e-06	0.00518319	-0.680634
cg42932385_TC21	cg42932385	Pdgfa	Pdgfa_Intergenic_downstream	-0.000306231	0.109887	-5.66161	2.01271e-06	0.00527348	-0.706791
cg35413298_BC11	cg35413298	Fzd8	Fzd8_Intergenic_upstream	0.000234699	0.92601	5.65837	2.03286e-06	0.00527954	-0.71675
cg42400769_BC21	cg42400769	Ankrd17	Ankrd17_Intron	-0.000250121	0.103869	-5.64834	2.09641e-06	0.00539726	-0.747528
cg30916005_BC21	cg30916005	Ttll5	Ttll5_Intron	-0.000395941	0.349681	-5.64284	2.13208e-06	0.00544177	-0.764394
cg39332375_BC11	cg39332375	Bcas1	Bcas1_Intergenic_downstream	-0.000154855	0.0343751	-5.63858	2.16014e-06	0.00546627	-0.777466
cg45583501_TC11	cg45583501	Prag1	Prag1_Intron	-0.000360132	0.0586966	-5.63105	2.21064e-06	0.00554664	-0.800564
cg39288413_TC21	cg39288413	B4galt5	B4galt5_Intron	0.000213928	0.912748	5.61524	2.32057e-06	0.00577354	-0.849071
cg46229872_BC21	cg46229872	Gan	Gan_Intron	-0.000269788	0.0829779	-5.60947	2.36204e-06	0.00582774	-0.866773
cg36972508_TC21	cg36972508	Trak2	Trak2_Intron	-0.000219767	0.0552824	-5.60138	2.42143e-06	0.0059249	-0.89159
cg37224526_BC21	cg37224526	Prlh	Prlh_Exon	0.00036799	0.831633	5.59484	2.47052e-06	0.00599547	-0.911647
cg39702672_TC21	cg39702672	2610316D01Rik	2610316D01Rik_Intergenic_downstream	0.00036469	0.710358	5.58778	2.5246e-06	0.00599696	-0.933281
cg35685049_BC11	cg35685049	Cdo1	Cdo1_Exon	-0.000367325	0.21974	-5.58543	2.54292e-06	0.00599696	-0.940505
cg44191101_TC11	cg44191101	Eps8l1	Eps8l1_threeUTR	-0.000245873	0.640859	-5.58524	2.54437e-06	0.00599696	-0.941075
cg40935687_BC21	cg40935687	Txndc8	Txndc8_Intron	0.000216802	0.915463	5.58424	2.55216e-06	0.00599696	-0.944129
cg38639903_BC21	cg38639903	Aplnr	Aplnr_Intergenic_downstream	0.000297594	0.798472	5.57848	2.59769e-06	0.00605589	-0.961796
cg37701521_TC21	cg37701521	Prrx1	Prrx1_Intergenic_upstream	0.000269563	0.898445	5.53844	2.93733e-06	0.00674684	-1.08454
cg31119303_TC21	cg31119303	Meg3	Meg3_Intergenic_upstream	0.000250431	0.843796	5.53818	2.93965e-06	0.00674684	-1.08533
cg37789381_TC21	cg37789381	4933439K11Rik	4933439K11Rik_Exon	-0.000187075	0.149904	-5.53333	2.98376e-06	0.00679539	-1.1002
cg28660516_TC21	cg28660516	Ggt1	Ggt1_threeUTR	0.000238154	0.513606	5.52993	3.01502e-06	0.00681417	-1.11061
cg40251568_BC21	cg40251568	Cnn3	Cnn3_Intergenic_upstream	-0.000143511	0.0367442	-5.5176	3.13128e-06	0.00694984	-1.14839
cg40388762_BC11	cg40388762	Dapp1	Dapp1_Intron	0.000142506	0.963932	5.51739	3.13329e-06	0.00694984	-1.14903
cg47564758_BC21	cg47564758	Tmem255a	Tmem255a_Intron	0.000369305	0.813501	5.51329	3.17296e-06	0.00694984	-1.16159
cg44509335_BC21	cg44509335	Akt1s1	Akt1s1_threeUTR	-0.000302762	0.0601683	-5.51284	3.17736e-06	0.00694984	-1.16298
cg47228467_TC21	cg47228467	Zmynd10	Zmynd10_Promoter	-0.000278034	0.0825027	-5.50975	3.20763e-06	0.00694984	-1.17244
cg46845249_BC11	cg46845249	A730043L09Rik	A730043L09Rik_Intergenic_downstream	0.000258511	0.751021	5.50891	3.21589e-06	0.00694984	-1.17501
cg37121023_BC21	cg37121023	Pax3	Pax3_fiveUTR	-0.000145885	0.0780096	-5.50035	3.30147e-06	0.00704364	-1.20123
cg43693919_TC11	cg43693919	Iqsec1	Iqsec1_fiveUTR	-0.000523918	0.0396191	-5.49774	3.32797e-06	0.00704364	-1.20921
cg34798041_TC11	cg34798041	4930539E08Rik	4930539E08Rik_Intron	0.000415934	0.896164	5.49748	3.33066e-06	0.00704364	-1.21002
cg40599556_BC21	cg40599556	Asph	Asph_threeUTR	0.000149188	0.939456	5.49183	3.38889e-06	0.0071086	-1.22732
cg46486806_BC21	cg46486806	Icam5	Icam5_Exon	-0.000545859	0.223413	-5.48986	3.4094e-06	0.0071086	-1.23334
cg36819111_BC21	cg36819111	Mgat4a	Mgat4a_Promoter	-0.000297798	0.070737	-5.48466	3.46429e-06	0.00713166	-1.24929
cg48208415_BC21	cg48208415	Mid1	Mid1_Intron	0.000384613	0.880567	5.4802	3.51203e-06	0.00713166	-1.26295
cg41545697_BC21	cg41545697	Cnr2	Cnr2_fiveUTR	-0.000265925	0.128752	-5.47856	3.52968e-06	0.00713166	-1.26795
cg43349775_BC11	cg43349775	2210010C04Rik	2210010C04Rik_Promoter	0.000193715	0.906769	5.47747	3.54156e-06	0.00713166	-1.2713
cg28318609_TC21	cg28318609	Cenpw	Cenpw_Intergenic_downstream	0.000387769	0.772088	5.47741	3.54217e-06	0.00713166	-1.27148
cg45273000_BC21	cg45273000	Eps8l2	Eps8l2_Intron	0.000269826	0.74497	5.47532	3.56499e-06	0.00713166	-1.27788
cg36516339_TC21	cg36516339	Add3	Add3_Intron	0.000306906	0.815475	5.46857	3.6395e-06	0.00720105	-1.29853
cg46285720_TC21	cg46285720	Galnt2	Galnt2_Exon	-0.000127458	0.0584451	-5.46599	3.66841e-06	0.00720105	-1.30643
cg38159873_TC21	cg38159873	Obp2b	Obp2b_Intron	0.000320091	0.757949	5.46562	3.67264e-06	0.00720105	-1.30758
cg44028492_TC21	cg44028492	Tas2r116	Tas2r116_Exon	0.000328494	0.762694	5.45875	3.75078e-06	0.00730588	-1.32859
cg39091683_TC11	cg39091683	Cstdc2	Cstdc2_Intron	0.000306484	0.913377	5.43503	4.03388e-06	0.00778256	-1.40119
cg44887375_BC11	cg44887375	Pak1	Pak1_fiveUTR	-0.000223399	0.0847229	-5.43382	4.04891e-06	0.00778256	-1.4049
cg47621970_BC21	cg47621970	Olfr1323	Olfr1323_Intergenic_upstream	0.000270543	0.916725	5.42993	4.09745e-06	0.00778256	-1.41679
cg34436223_BC21	cg34436223	Adamts5	Adamts5_fiveUTR	-0.000178241	0.0638951	-5.42968	4.10065e-06	0.00778256	-1.41757
cg33014872_BC21	cg33014872	Selenop	Selenop_fiveUTR	-0.000110592	0.0315174	-5.42554	4.15299e-06	0.00779303	-1.43022
cg28113426_BC11	cg28113426	Plekhg1	Plekhg1_Intron	0.000281219	0.813373	5.42508	4.15881e-06	0.00779303	-1.43161
cg46965787_BC21	cg46965787	Gm16551	Gm16551_Intron	0.000248745	0.877898	5.42034	4.21976e-06	0.00780372	-1.44613
cg47007236_BC11	cg47007236	Filip1	Filip1_Intron	-0.000119511	0.0235859	-5.41961	4.2292e-06	0.00780372	-1.44836
cg46623515_BC21	cg46623515	Olfr976	Olfr976_threeUTR	0.000397481	0.735082	5.4185	4.24359e-06	0.00780372	-1.45174
cg33759508_BC21	cg33759508	Pced1b	Pced1b_Intron	0.000373995	0.834436	5.4116	4.33432e-06	0.00781198	-1.47285
cg35915571_TC21	cg35915571	Mapk4	Mapk4_Intron	0.000383176	0.598858	5.40826	4.37895e-06	0.00781198	-1.48306
cg39121974_BC11	cg39121974	Id1	Id1_threeUTR	-0.000266275	0.036204	-5.40783	4.38474e-06	0.00781198	-1.48438
cg41155464_BC11	cg41155464	Fggy	Fggy_Exon	0.000313034	0.921848	5.40324	4.44695e-06	0.00781198	-1.49843
cg32337230_TC21	cg32337230	Sh3bp5	Sh3bp5_Intron	-0.000342206	0.208306	-5.40165	4.46863e-06	0.00781198	-1.50328
cg33324690_BC21	cg33324690	Trps1	Trps1_Intron	0.00052042	0.853759	5.40153	4.47034e-06	0.00781198	-1.50366
cg38205914_BC21	cg38205914	Gm13420	Gm13420_Promoter	-0.000243995	0.260685	-5.40016	4.48913e-06	0.00781198	-1.50785
cg31035738_TC21	cg31035738	Lgmn	Lgmn_Intron	-0.00010457	0.0323557	-5.39961	4.49665e-06	0.00781198	-1.50952
cg33595928_TC21	cg33595928	Nfam1	Nfam1_Intron	0.000289872	0.856368	5.39781	4.52158e-06	0.00781198	-1.51503
cg34827867_BC21	cg34827867	Tff1	Tff1_fiveUTR	0.000286679	0.854023	5.39776	4.52229e-06	0.00781198	-1.51519
cg33283301_BC21	cg33283301	Oxr1	Oxr1_fiveUTR	-8.88036e-05	0.0296988	-5.39503	4.56027e-06	0.00781198	-1.52353
cg28495994_BC11	cg28495994	Gm4981	Gm4981_Promoter	0.000187643	0.75866	5.39291	4.59002e-06	0.00781198	-1.53001
cg33916196_TC21	cg33916196	Snx29	Snx29_Intron	0.000308666	0.652621	5.39283	4.59109e-06	0.00781198	-1.53024
cg34540020_BC21	cg34540020	Erg	Erg_Intron	0.000447704	0.820862	5.38356	4.72352e-06	0.00799139	-1.5586
cg39079711_BC21	cg39079711	Nkx2-2	Nkx2-2_threeUTR	-0.000128145	0.0374872	-5.37056	4.91549e-06	0.00826891	-1.59832
cg47677507_TC21	cg47677507	Mcf2	Mcf2_fiveUTR	-0.000171947	0.0475814	-5.35904	5.09205e-06	0.00845315	-1.6335
cg38186630_BC21	cg38186630	Fcnb	Fcnb_Intron	0.000264905	0.727859	5.35848	5.10094e-06	0.00845315	-1.63524
cg43699169_TC21	cg43699169	Wnt7a	Wnt7a_Intergenic_downstream	0.000299915	0.763163	5.35666	5.12944e-06	0.00845315	-1.64079
cg29804790_TC21	cg29804790	Lyrm9	Lyrm9_Intergenic_upstream	0.000218161	0.922779	5.35583	5.14251e-06	0.00845315	-1.64333
cg28212797_BC21	cg28212797	Gm20125	Gm20125_Intron	0.000307138	0.878791	5.35423	5.16776e-06	0.00845315	-1.64821
cg39235680_BC21	cg39235680	Pkig	Pkig_Intron	0.000278165	0.727608	5.35221	5.19981e-06	0.00845883	-1.65437
cg47387205_TC21	cg47387205	Ackr2	Ackr2_fiveUTR	0.000257613	0.757834	5.3493	5.24646e-06	0.00848808	-1.66328
cg33631324_BC11	cg33631324	Lncppara	Lncppara_Intron	-0.000252376	0.107825	-5.34201	5.365e-06	0.00863269	-1.68555
cg36581458_TC11	cg36581458	1810007D17Rik	1810007D17Rik_Intron	0.000277835	0.917761	5.33962	5.40435e-06	0.00864901	-1.69283
cg33489390_BO11	cg33489390	Mroh4	Mroh4_Promoter	0.000229313	0.726039	5.33695	5.44883e-06	0.00865715	-1.701
cg30012234_TC21	cg30012234	Ikzf3	Ikzf3_Intron	0.000277207	0.910084	5.3358	5.46792e-06	0.00865715	-1.70449
cg35649501_BC21	cg35649501	Grxcr2	Grxcr2_Exon	0.000473403	0.719913	5.33279	5.51868e-06	0.00869104	-1.71369
cg39057858_TC21	cg39057858	Zfp133-ps	Zfp133-ps_Intergenic_upstream	0.000258258	0.649139	5.3206	5.72871e-06	0.00897238	-1.75092
cg45790500_TC11	cg45790500	Psd3	Psd3_Intron	0.000231756	0.889096	5.31894	5.75794e-06	0.00897238	-1.75599
cg43825494_BC21	cg43825494	Itpr1	Itpr1_Intergenic_downstream	0.000420021	0.704069	5.31553	5.81842e-06	0.00900837	-1.7664
cg45316888_BC11	cg45316888	Cd209a	Cd209a_Exon	0.000239034	0.935133	5.31421	5.84189e-06	0.00900837	-1.77041
cg47834370_BC21	cg47834370	Fam90a1b	Fam90a1b_Intergenic_downstream	0.000233019	0.890797	5.30812	5.95183e-06	0.00906913	-1.78898
cg38248879_BC11	cg38248879	Sh2d3c	Sh2d3c_fiveUTR	0.000275492	0.91328	5.30703	5.97183e-06	0.00906913	-1.79233
cg31448806_TC21	cg31448806	Rreb1	Rreb1_Intergenic_upstream	0.000353079	0.57118	5.30696	5.97319e-06	0.00906913	-1.79255
cg33447818_BC21	cg33447818	Gm41341	Gm41341_Intergenic_upstream	0.000333125	0.510731	5.30085	6.08588e-06	0.00915115	-1.81117
cg40033883_TC21	cg40033883	Hrnr	Hrnr_Exon	0.000238511	0.658226	5.29996	6.10263e-06	0.00915115	-1.81391
cg32539962_BC21	cg32539962	Fgf9	Fgf9_Intergenic_downstream	0.000381686	0.798925	5.29759	6.14698e-06	0.00915115	-1.82113
cg37476964_BC21	cg37476964	Ppp1r15b	Ppp1r15b_Exon	0.000403862	0.785689	5.29739	6.15084e-06	0.00915115	-1.82175
cg33585695_BC11	cg33585695	4930407I10Rik	4930407I10Rik_Promoter	0.000261287	0.736001	5.29313	6.23146e-06	0.00922221	-1.83472
cg43826743_BC21	cg43826743	Bhlhe40	Bhlhe40_Exon	0.000423249	0.717152	5.2916	6.2609e-06	0.00922221	-1.83942
cg38689211_BC21	cg38689211	4631405J19Rik	4631405J19Rik_Exon	-0.000238189	0.16389	-5.28891	6.31258e-06	0.0092523	-1.84761
cg42891270_TC21	cg42891270	Hip1	Hip1_Intron	-0.000345518	0.14347	-5.28618	6.3656e-06	0.00928405	-1.85594
cg30687111_BC21	cg30687111	Ttc6	Ttc6_Intron	0.000345427	0.832129	5.28227	6.44226e-06	0.0093498	-1.86786
cg47147075_BC11	cg47147075	Mras	Mras_fiveUTR	-0.000124142	0.0367117	-5.28052	6.47693e-06	0.00935427	-1.87321
cg40932116_BC21	cg40932116		NA_Intron	0.000334932	0.766004	5.27749	6.53729e-06	0.00939561	-1.88245
cg40497627_BC21	cg40497627	Adgrl4	Adgrl4_fiveUTR	-0.000241188	0.0998071	-5.27261	6.63558e-06	0.0094908	-1.89731
cg29847137_BC11	cg29847137	Slfn5os	Slfn5os_Exon	-0.000125493	0.0241251	-5.26869	6.71586e-06	0.00955745	-1.90929
cg30150807_BC21	cg30150807	1700012B07Rik	1700012B07Rik_Promoter	0.000270124	0.818536	5.26584	6.77475e-06	0.00955745	-1.91798
cg47866714_BC11	cg47866714	Eda	Eda_Intron	0.000482239	0.839603	5.26563	6.77902e-06	0.00955745	-1.91861
cg46486699_TC21	cg46486699	Icam5	Icam5_Exon	-0.000225949	0.150487	-5.26371	6.81907e-06	0.00956834	-1.92447
cg36160964_TC11	cg36160964	Olfr76	Olfr76_Promoter	0.00033688	0.801537	5.26141	6.86709e-06	0.00959027	-1.93146
cg45189276_BC21	cg45189276	Fgfr2	Fgfr2_Intron	0.00028283	0.756114	5.25862	6.92614e-06	0.00959286	-1.93999
cg34576977_TC21	cg34576977	Arid1b	Arid1b_Intron	-0.000673578	0.241335	-5.25594	6.98317e-06	0.00959286	-1.94815
cg34879485_TC21	cg34879485	H2-Q4	H2-Q4_Intergenic_downstream	0.000200951	0.722519	5.25524	6.99818e-06	0.00959286	-1.95029
cg43390361_TC21	cg43390361	AI854703	AI854703_Exon	-0.000424772	0.342737	-5.25522	6.99854e-06	0.00959286	-1.95034
cg46686013_BC21	cg46686013	4833428L15Rik	4833428L15Rik_Promoter	-0.000172797	0.0644732	-5.24654	7.18698e-06	0.00980575	-1.9768
cg34708977_BC21	cg34708977	Zfp948	Zfp948_fiveUTR	-0.000361139	0.148602	-5.24169	7.2945e-06	0.00986934	-1.99158
cg40339763_TC21	cg40339763	Sgms2	Sgms2_Intron	-0.00014531	0.0689877	-5.24143	7.30025e-06	0.00986934	-1.99237
cg43745007_BC21	cg43745007	Tafa4	Tafa4_Promoter	-0.000154912	0.0793237	-5.23513	7.44232e-06	0.00993546	-2.01155
cg45267470_BC21	cg45267470	Ifitm2	Ifitm2_Intron	0.000246543	0.816525	5.2339	7.47037e-06	0.00993546	-2.0153
cg47685457_TC21	cg47685457	Ldoc1	Ldoc1_fiveUTR	-0.000323547	0.169184	-5.23274	7.49703e-06	0.00993546	-2.01884
cg40017798_TC21	cg40017798	Dennd4b	Dennd4b_threeUTR	-0.000205617	0.941702	-5.23206	7.51262e-06	0.00993546	-2.02091
cg48196139_BC21	cg48196139	Tlr7	Tlr7_Intron	-0.000209786	0.0590233	-5.23053	7.54793e-06	0.00993546	-2.02558
cg37505609_BC21	cg37505609	Nav1	Nav1_Intron	0.000303064	0.651434	5.23042	7.5505e-06	0.00993546	-2.02592
cg32561619_BC11	cg32561619	Tnfrsf19	Tnfrsf19_Intron	0.000240543	0.772594	5.22367	7.70797e-06	0.0100978	-2.04646
cg37684393_TC21	cg37684393	Ankrd45	Ankrd45_Intron	0.000228786	0.812968	5.2207	7.77837e-06	0.0101212	-2.05551
cg30956605_BC21	cg30956605	Tshr	Tshr_Exon	-0.000192219	0.110735	-5.2184	7.8334e-06	0.0101212	-2.06253
cg36235160_TC21	cg36235160	Klf9	Klf9_Intron	-0.000265254	0.106242	-5.21761	7.85223e-06	0.0101212	-2.06492
cg44042603_TC21	cg44042603	Dusp16	Dusp16_Intron	0.000292185	0.627377	5.21705	7.86561e-06	0.0101212	-2.06661
cg35597922_TC11	cg35597922	Psd2	Psd2_Intron	0.000528809	0.701577	5.21576	7.89679e-06	0.0101212	-2.07055
cg46814640_TC21	cg46814640	Adpgk	Adpgk_Intergenic_upstream	0.000289884	0.699366	5.21003	8.03646e-06	0.0102558	-2.088
cg46021825_BC21	cg46021825	Mt1	Mt1_Intergenic_downstream	0.000208239	0.499031	5.20472	8.168e-06	0.010379	-2.10416
cg40638861_BC21	cg40638861	Tmem64	Tmem64_Intron	-0.00028597	0.220872	-5.1999	8.28947e-06	0.0104316	-2.11885
cg29159359_BC21	cg29159359	Il23a	Il23a_fiveUTR	0.000232131	0.798164	5.19941	8.30177e-06	0.0104316	-2.12032
cg43350850_TC11	cg43350850	Try4	Try4_Intergenic_upstream	0.000236828	0.9461	5.19889	8.31514e-06	0.0104316	-2.12192
cg39984848_BC11	cg39984848	Pear1	Pear1_Exon	0.00025058	0.960964	5.19423	8.43436e-06	0.0105365	-2.13609
cg44830725_TC11	cg44830725	Rab38	Rab38_Intron	0.00010439	0.971374	5.18542	8.66484e-06	0.010779	-2.16291
cg32525583_TC21	cg32525583	Gja3	Gja3_Promoter	-0.000235583	0.149931	-5.18326	8.72229e-06	0.0107921	-2.16949
cg38921438_BC21	cg38921438	Dtwd1	Dtwd1_Intergenic_downstream	0.000380552	0.674804	5.18228	8.74828e-06	0.0107921	-2.17245
cg43973707_BC11	cg43973707	Cd9	Cd9_Promoter	0.000174124	0.959039	5.17741	8.87955e-06	0.0108829	-2.18727
cg28123476_TC11	cg28123476	Esr1	Esr1_Intron	0.000304634	0.829872	5.17683	8.89537e-06	0.0108829	-2.18904
cg35012184_TC21	cg35012184	Rftn1	Rftn1_Intron	-0.00015834	0.0441507	-5.17256	9.01227e-06	0.0109283	-2.20202
cg43663019_BC11	cg43663019	Arhgap25	Arhgap25_Intergenic_downstream	0.000308285	0.887479	5.17206	9.02617e-06	0.0109283	-2.20356
cg40215081_TC21	cg40215081	Gpr88	Gpr88_Exon	0.000414455	0.856411	5.17071	9.06342e-06	0.0109283	-2.20765
cg43889452_TC21	cg43889452	Tmem72	Tmem72_Intergenic_upstream	0.000234918	0.631736	5.1695	9.09695e-06	0.0109283	-2.21133
cg43555339_TC21	cg43555339	Atoh8	Atoh8_Intron	0.000270128	0.666439	5.16771	9.14695e-06	0.0109283	-2.21678
cg36703817_TC21	cg36703817	Pkhd1	Pkhd1_Exon	0.000464231	0.530728	5.16746	9.15395e-06	0.0109283	-2.21754
cg34885304_TC11	cg34885304	Tubb5	Tubb5_Exon	0.000218565	0.969633	5.16264	9.28978e-06	0.0110459	-2.23219
cg40800486_TC11	cg40800486	Fam205a1	Fam205a1_Exon	0.000170698	0.886039	5.15898	9.39422e-06	0.0111254	-2.24331
cg42285839_BC11	cg42285839	1700025M24Rik	1700025M24Rik_Promoter	0.000252743	0.925001	5.15708	9.44892e-06	0.0111255	-2.24909
cg39443464_BC11	cg39443464	Hnf4g	Hnf4g_Intron	0.000449239	0.55348	5.15637	9.46949e-06	0.0111255	-2.25125
cg30696568_BC21	cg30696568	Mia2	Mia2_fiveUTR	-0.000205285	0.0682555	-5.1537	9.54722e-06	0.0111425	-2.25938
cg33530572_BC21	cg33530572	Cacng2	Cacng2_Intron	0.000327192	0.513286	5.15329	9.55917e-06	0.0111425	-2.26062
cg38936423_BC21	cg38936423	Acoxl	Acoxl_Intron	0.000363416	0.833501	5.15199	9.59703e-06	0.0111427	-2.26455
cg38021431_TC21	cg38021431	Cdc123	Cdc123_Intron	0.00023903	0.88375	5.14777	9.72181e-06	0.0111731	-2.2774
cg36735524_TC21	cg36735524	Adgrb3	Adgrb3_Exon	0.000233216	0.839842	5.14702	9.7441e-06	0.0111731	-2.27968
cg34630875_BC21	cg34630875	1700110C19Rik	1700110C19Rik_Promoter	0.00036355	0.829336	5.145	9.80437e-06	0.0111731	-2.28581
cg33159730_BC21	cg33159730	Myo10	Myo10_Intron	0.000424504	0.817566	5.14281	9.87028e-06	0.0111731	-2.29247
cg39991277_BC11	cg39991277	Rhbg	Rhbg_Intergenic_downstream	-0.000203408	0.0642445	-5.14171	9.90352e-06	0.0111731	-2.29582
cg48021149_BC21	cg48021149	Btk	Btk_Intron	0.000211705	0.929207	5.14163	9.90589e-06	0.0111731	-2.29605
cg30144712_TC21	cg30144712	Gna13	Gna13_Intron	-0.000178805	0.0493702	-5.14144	9.91166e-06	0.0111731	-2.29663
cg44190773_BC11	cg44190773	Eps8l1	Eps8l1_fiveUTR	0.000880521	0.638082	5.141	9.92509e-06	0.0111731	-2.29798
cg44191059_TC21	cg44191059	Eps8l1	Eps8l1_threeUTR	-0.000434796	0.322041	-5.12842	1.03139e-05	0.0115576	-2.33619
cg29001134_BC11	cg29001134	Atxn7l3b	Atxn7l3b_Intron	0.000521516	0.703666	5.12744	1.03448e-05	0.0115576	-2.33916
cg40172834_BC21	cg40172834	5330417C22Rik	5330417C22Rik_threeUTR	0.000246599	0.642155	5.12552	1.04058e-05	0.0115821	-2.34501
cg40796097_TC11	cg40796097	Ccl27a	Ccl27a_Intron	0.000461323	0.884566	5.12428	1.04452e-05	0.0115824	-2.34876
cg40388923_TC21	cg40388923	Dapp1	Dapp1_Intron	-0.000196857	0.0854428	-5.12075	1.05584e-05	0.011618	-2.35948
cg36479969_TC11	cg36479969	Cfap43	Cfap43_Intron	0.000523506	0.814151	5.11985	1.05875e-05	0.011618	-2.36222
cg39082273_BC21	cg39082273	Pax1	Pax1_Intergenic_downstream	0.000444484	0.603933	5.11962	1.0595e-05	0.011618	-2.36292
cg48215419_BC21	cg48215419	Usp9y	Usp9y_Intron	0.000246959	0.496333	5.11739	1.06673e-05	0.0116541	-2.36968
cg34588348_TC21	cg34588348	Synj2	Synj2_Intron	0.000252796	0.859571	5.1161	1.07095e-05	0.0116544	-2.37361
cg33538754_BC21	cg33538754	Elfn2	Elfn2_Exon	0.000364023	0.64909	5.11498	1.07463e-05	0.0116544	-2.37702
cg29532847_BC21	cg29532847	Tcf7	Tcf7_Intron	-0.00038195	0.203382	-5.11016	1.09056e-05	0.011784	-2.39164
cg44720359_TC21	cg44720359	1810026B05Rik	1810026B05Rik_Intergenic_upstream	0.000380608	0.791193	5.10718	1.10053e-05	0.0118485	-2.40069
cg40426988_TC21	cg40426988	A830019L24Rik	A830019L24Rik_Promoter	0.000194818	0.491532	5.10072	1.12245e-05	0.0120407	-2.42029
cg39053133_BC21	cg39053133	Banf2	Banf2_Intron	0.000457293	0.743453	5.09402	1.14566e-05	0.0122357	-2.44064
cg42510123_TC11	cg42510123	Ptpn13	Ptpn13_Intergenic_upstream	0.000275109	0.938654	5.09274	1.15014e-05	0.0122357	-2.44451
cg46826177_BC11	cg46826177	Thsd4	Thsd4_Intron	0.000275722	0.906611	5.09192	1.15303e-05	0.0122357	-2.447
cg39915184_BC21	cg39915184	Rapgef2	Rapgef2_Intron	-0.000211977	0.0736381	-5.08284	1.18543e-05	0.0125347	-2.47455
cg40014932_BC11	cg40014932	Gm19710	Gm19710_Exon	0.000136778	0.955434	5.08042	1.19422e-05	0.0125827	-2.48189
cg31184384_BC21	cg31184384	Mir6388	Mir6388_Intergenic_downstream	-0.000503441	0.285519	-5.077	1.20676e-05	0.0126697	-2.49227
cg38871820_BC11	cg38871820	Sptbn5	Sptbn5_Exon	0.00022703	0.57348	5.07246	1.22357e-05	0.012682	-2.50601
cg46953745_TC21	cg46953745	Khdc3	Khdc3_fiveUTR	0.000228317	0.760601	5.06973	1.23383e-05	0.012682	-2.51431
cg46020960_TC21	cg46020960	Bbs2	Bbs2_Intergenic_upstream	0.000231115	0.834134	5.06965	1.23413e-05	0.012682	-2.51455
cg28367634_TC11	cg28367634	Fyn	Fyn_Intron	0.000289696	0.906208	5.06848	1.23854e-05	0.012682	-2.51809
cg28237839_BC21	cg28237839	Map3k5	Map3k5_Intron	-0.000136625	0.0514904	-5.06823	1.23947e-05	0.012682	-2.51884
cg37718288_BC21	cg37718288	Gpr161	Gpr161_Promoter	0.000251709	0.86966	5.06812	1.23989e-05	0.012682	-2.51918
cg33695261_BC21	cg33695261	Lrrk2	Lrrk2_Promoter	-0.000166383	0.0455434	-5.06767	1.24161e-05	0.012682	-2.52055
cg40796011_BC11	cg40796011	Il11ra1	Il11ra1_Exon	0.000208638	0.840764	5.06751	1.2422e-05	0.012682	-2.52102
cg35316313_TC21	cg35316313	Prkce	Prkce_Intron	-0.000187483	0.0517363	-5.06584	1.24854e-05	0.0127009	-2.52608
cg33637927_BC21	cg33637927	Gramd4	Gramd4_Intron	-0.000260234	0.065608	-5.06477	1.25263e-05	0.0127009	-2.52933
cg28707725_TC21	cg28707725	Misp	Misp_Intron	0.00032409	0.742228	5.06232	1.26206e-05	0.0127271	-2.53678
cg32932944_TC21	cg32932944	Gpc5	Gpc5_Intron	0.000472546	0.589054	5.06121	1.26633e-05	0.0127271	-2.54013
cg28157445_BC11	cg28157445	Sash1	Sash1_Intron	0.000211117	0.892267	5.06075	1.26812e-05	0.0127271	-2.54154
cg47880085_TC21	cg47880085	Nhsl2	Nhsl2_Intron	0.000222175	0.934333	5.05936	1.2735e-05	0.012738	-2.54574
cg40799074_TO11	cg40799074	Ccl27b	Ccl27b_Intron	0.000229333	0.735167	5.05781	1.27952e-05	0.0127551	-2.55043
cg35773663_BC21	cg35773663	Fbn2	Fbn2_Intergenic_upstream	0.000358227	0.883771	5.04459	1.3322e-05	0.0132173	-2.59051
cg35312380_BC21	cg35312380	Srbd1	Srbd1_fiveUTR	0.000308127	0.887428	5.04326	1.33762e-05	0.0132173	-2.59454
cg45738538_BC21	cg45738538	Galntl6	Galntl6_Exon	0.00024166	0.648961	5.04231	1.34148e-05	0.0132173	-2.5974
cg42284666_TC21	cg42284666	Fryl	Fryl_Intron	0.000271276	0.838027	5.04176	1.34374e-05	0.0132173	-2.59907
cg37099600_BC11	cg37099600	Asic4	Asic4_Promoter	-0.000119405	0.0260304	-5.03807	1.35893e-05	0.0133209	-2.61023
cg42742573_TC21	cg42742573	Pptc7	Pptc7_Promoter	0.000421356	0.733558	5.03493	1.37202e-05	0.0133209	-2.61975
cg29976585_BC21	cg29976585	Hoxb13	Hoxb13_Intergenic_downstream	-0.000151877	0.0662042	-5.03467	1.3731e-05	0.0133209	-2.62054
cg46486778_BC11	cg46486778	Icam5	Icam5_Exon	-0.000214827	0.334255	-5.03398	1.376e-05	0.0133209	-2.62263
cg32780237_BC21	cg32780237	Pcdh20	Pcdh20_Intergenic_upstream	0.000355687	0.810718	5.03341	1.37838e-05	0.0133209	-2.62435
cg38186386_TC11	cg38186386	Fcnb	Fcnb_Promoter	0.000231174	0.702369	5.03273	1.38127e-05	0.0133209	-2.62643
cg29968500_BC21	cg29968500	Ngfr	Ngfr_Intergenic_upstream	0.000192109	0.660599	5.02669	1.40693e-05	0.0135243	-2.6447
cg37000954_BC21	cg37000954	Nrp2	Nrp2_Intron	0.000234957	0.802768	5.02465	1.4157e-05	0.0135454	-2.65088
cg36471625_BC21	cg36471625	Neurl1a	Neurl1a_Intron	0.000285302	0.718549	5.02332	1.42148e-05	0.0135454	-2.65492
cg37476948_TC21	cg37476948	Ppp1r15b	Ppp1r15b_Exon	0.000573723	0.667748	5.023	1.42284e-05	0.0135454	-2.65587
cg47997712_BC21	cg47997712	Diaph2	Diaph2_Intergenic_upstream	0.000299545	0.846553	5.02161	1.42888e-05	0.0135592	-2.66008
cg39226202_TC21	cg39226202	Sgk2	Sgk2_Intron	0.000246585	0.742995	5.02022	1.43498e-05	0.0135604	-2.66431
cg47203257_TC21	cg47203257	Nek11	Nek11_Intron	0.000338203	0.614531	5.01935	1.43879e-05	0.0135604	-2.66694
cg29808386_BC21	cg29808386	Ksr1	Ksr1_Intron	0.000354372	0.744119	5.01845	1.44274e-05	0.0135604	-2.66967
cg44084807_BC11	cg44084807	4922502N22Rik	4922502N22Rik_Intergenic_downstream	0.000447471	0.583218	5.01428	1.4612e-05	0.0136905	-2.68229
cg42997013_TC21	cg42997013	Lmtk2	Lmtk2_Intron	-0.00014274	0.0575148	-5.01213	1.47081e-05	0.0136969	-2.6888
cg35615532_TC21	cg35615532	Gm37013	Gm37013_Intron	0.00053292	0.606536	5.01205	1.47115e-05	0.0136969	-2.68902
cg38989760_TC21	cg38989760	Bmp2	Bmp2_Intergenic_upstream	0.000176959	0.88236	5.00517	1.50231e-05	0.0138939	-2.70984
cg38853782_BC21	cg38853782	Srp14	Srp14_Intergenic_upstream	-0.000228951	0.215091	-5.00493	1.50341e-05	0.0138939	-2.71056
cg39476848_TC11	cg39476848	C030034L19Rik	C030034L19Rik_threeUTR	0.000417393	0.884037	5.00428	1.5064e-05	0.0138939	-2.71253
cg31363886_BC11	cg31363886	Nrsn1	Nrsn1_Intergenic_upstream	0.000322171	0.607718	5.00326	1.51108e-05	0.0138939	-2.71561
cg30133307_TC11	cg30133307	Prkca	Prkca_Intron	0.000257479	0.846748	5.00206	1.51665e-05	0.013902	-2.71926
cg29203451_TC21	cg29203451	Xbp1	Xbp1_Intron	0.000342349	0.914084	4.9953	1.54819e-05	0.0140196	-2.73969
cg40252672_TC21	cg40252672	Cnn3	Cnn3_Intron	0.000387541	0.888484	4.99464	1.55131e-05	0.0140196	-2.74169
cg31337177_TC21	cg31337177	Vmn1r188	Vmn1r188_threeUTR	0.000219187	0.558293	4.99449	1.55202e-05	0.0140196	-2.74214
cg40463372_TC21	cg40463372	Prkacb	Prkacb_Intron	0.000359224	0.83647	4.99437	1.55259e-05	0.0140196	-2.74251
cg41500490_TC11	cg41500490	Fgr	Fgr_Promoter	0.000300093	0.851839	4.99425	1.55316e-05	0.0140196	-2.74287
cg47233583_BC21	cg47233583	Mst1r	Mst1r_threeUTR	0.000264494	0.68698	4.99112	1.56803e-05	0.0141108	-2.75233
cg40796099_BC11	cg40796099	Ccl27a	Ccl27a_Intron	0.000226565	0.883315	4.98528	1.59621e-05	0.0142728	-2.77001
cg46113988_TC21	cg46113988	Tango6	Tango6_Intron	-0.000190776	0.0710972	-4.98503	1.59739e-05	0.0142728	-2.77074
cg45275117_BC21	cg45275117	Tspan4	Tspan4_fiveUTR	-0.000155424	0.139684	-4.9844	1.60049e-05	0.0142728	-2.77266
cg40807924_TC21	cg40807924	Tpm2	Tpm2_threeUTR	0.000285159	0.824134	4.98158	1.6143e-05	0.0143528	-2.7812
cg34928959_TC21	cg34928959	Adgrf1	Adgrf1_Intergenic_upstream	0.000372535	0.651564	4.98042	1.61998e-05	0.0143601	-2.78468
cg28579367_TC11	cg28579367	1110002J07Rik	1110002J07Rik_Exon	-6.92347e-05	0.02441	-4.9789	1.62753e-05	0.0143644	-2.7893
cg39806183_BC11	cg39806183	Med12l	Med12l_Exon	-0.000347078	0.0883609	-4.97586	1.64264e-05	0.0143644	-2.79847
cg38563147_TC11	cg38563147	Mtx2	Mtx2_Intergenic_downstream	-0.000118939	0.0476257	-4.97502	1.64684e-05	0.0143644	-2.801
cg32894858_BC21	cg32894858	1700128A07Rik	1700128A07Rik_Intergenic_upstream	0.000305315	0.680717	4.9746	1.64897e-05	0.0143644	-2.80228
cg34367183_BC21	cg34367183	Robo2	Robo2_Intergenic_upstream	0.000335821	0.714054	4.97412	1.65137e-05	0.0143644	-2.80373
cg37986372_TC21	cg37986372	Mir205	Mir205_Exon	0.000343479	0.679246	4.97376	1.6532e-05	0.0143644	-2.80482
cg36001120_TC21	cg36001120	Mir5127	Mir5127_Intergenic_downstream	0.000337672	0.840585	4.97351	1.65443e-05	0.0143644	-2.80556
cg31917282_TC21	cg31917282	Scamp1	Scamp1_Promoter	0.000339733	0.73109	4.97065	1.66891e-05	0.0144478	-2.81421
cg38329797_TC21	cg38329797	Arhgap15	Arhgap15_Intron	0.000323803	0.723138	4.9688	1.67836e-05	0.0144873	-2.81981
cg43617962_TC21	cg43617962	Loxl3	Loxl3_Exon	0.000307115	0.804262	4.96304	1.70805e-05	0.0147007	-2.83721
cg38561445_TC21	cg38561445	Mtx2	Mtx2_Intergenic_downstream	0.000295647	0.739244	4.9597	1.72548e-05	0.0147735	-2.84728
cg33821062_BO11	cg33821062	Krt87	Krt87_Exon	0.000173502	0.759664	4.95951	1.72649e-05	0.0147735	-2.84786
cg39141301_BC21	cg39141301	Pxmp4	Pxmp4_Intron	0.000318902	0.876771	4.95761	1.73654e-05	0.0147981	-2.85362
cg33268190_TC21	cg33268190	Rims2	Rims2_Intron	0.000488409	0.67871	4.95707	1.73937e-05	0.0147981	-2.85524
cg43459664_BC21	cg43459664	6430584L05Rik	6430584L05Rik_Intron	0.000280579	0.54251	4.94915	1.78181e-05	0.0151157	-2.87915
cg38440764_TC21	cg38440764	Pla2r1	Pla2r1_Intron	0.000310421	0.838205	4.94798	1.78819e-05	0.0151265	-2.8827
cg48213681_TC22	cg48213681	Eif2s3y	Eif2s3y_Intron	-0.000498433	0.579134	-4.94502	1.80438e-05	0.01522	-2.89164
cg47357980_TC11	cg47357980	Scn10a	Scn10a_Exon	0.000185536	0.631654	4.94361	1.81214e-05	0.0152421	-2.89589
cg46309618_TC21	cg46309618	Galnt2	Galnt2_Intron	0.000300801	0.66661	4.94122	1.82535e-05	0.0153036	-2.9031
cg35020430_BC21	cg35020430	Tbc1d5	Tbc1d5_Intergenic_upstream	0.000319873	0.741443	4.93952	1.83481e-05	0.0153036	-2.90822
cg36638907_BC21	cg36638907	Sgk3	Sgk3_Intron	-0.000184953	0.946349	-4.93949	1.83496e-05	0.0153036	-2.90831
cg46231471_BC21	cg46231471	Cmip	Cmip_Intron	0.000167604	0.508719	4.93613	1.85381e-05	0.0154174	-2.91844
cg47372791_BC21	cg47372791	1700020M21Rik	1700020M21Rik_Exon	0.000208031	0.606251	4.93339	1.86939e-05	0.0155033	-2.92674
cg31119785_TC11	cg31119785	Meg3	Meg3_Exon	0.000234061	0.926666	4.92977	1.89007e-05	0.0156311	-2.93766
cg38534465_TC21	cg38534465	Map3k20	Map3k20_Intron	0.000378871	0.814986	4.9288	1.89566e-05	0.0156337	-2.94058
cg43269516_BC21	cg43269516	2210408F21Rik	2210408F21Rik_Promoter	-0.000202313	0.0644908	-4.92681	1.90718e-05	0.0156553	-2.94659
cg43055372_TC21	cg43055372	Katnal1	Katnal1_Intron	-0.00030339	0.222099	-4.92652	1.90887e-05	0.0156553	-2.94747
cg39089795_BC11	cg39089795	Nxt1	Nxt1_Intergenic_upstream	0.000416794	0.848447	4.92201	1.93523e-05	0.0157526	-2.96107
cg42641643_TC21	cg42641643	Mlec	Mlec_Intron	-0.000296264	0.161431	-4.92196	1.93552e-05	0.0157526	-2.96122
cg40139668_BC21	cg40139668	Slc16a1	Slc16a1_Intron	0.000235688	0.752238	4.92063	1.94332e-05	0.0157526	-2.96521
cg29694436_TC21	cg29694436	Myh10	Myh10_Intron	0.000256715	0.865533	4.92028	1.9454e-05	0.0157526	-2.96627
cg34394205_BC11	cg34394205	D16Ertd472e	D16Ertd472e_Intergenic_downstream	0.000290039	0.714285	4.91996	1.94733e-05	0.0157526	-2.96725
cg34978636_TC11	cg34978636	Trerf1	Trerf1_Intron	0.000229711	0.93715	4.91901	1.95292e-05	0.0157548	-2.97009
cg38600033_BC21	cg38600033	Ube2e3	Ube2e3_Intron	0.00020521	0.933452	4.91679	1.96618e-05	0.0158187	-2.9768
cg41790038_BC21	cg41790038	Prkcz	Prkcz_fiveUTR	-0.000145902	0.131465	-4.91445	1.9802e-05	0.0158494	-2.98385
cg39906135_TC21	cg39906135	Fstl5	Fstl5_Intergenic_downstream	0.000267052	0.749552	4.91385	1.98385e-05	0.0158494	-2.98567
cg40797885_TO21	cg40797885	Fam205a2	Fam205a2_Intergenic_upstream	0.000165895	0.672012	4.91348	1.98606e-05	0.0158494	-2.98678
cg46315616_BC21	cg46315616	Galnt2	Galnt2_Intron	-0.000410001	0.115589	-4.91256	1.99163e-05	0.0158512	-2.98956
cg35076740_BC21	cg35076740	Nudt12os	Nudt12os_Intergenic_downstream	0.000357932	0.854902	4.91133	1.9991e-05	0.0158679	-2.99327
cg29216727_TC21	cg29216727	Ccm2	Ccm2_Exon	-0.000160518	0.063012	-4.90866	2.0154e-05	0.0158836	-3.00131
cg43189806_BC21	cg43189806	Mir6370	Mir6370_Intergenic_downstream	0.0002466	0.440645	4.90862	2.01561e-05	0.0158836	-3.00142
cg43765170_BC21	cg43765170	Foxp1	Foxp1_Intron	-0.000399098	0.141265	-4.90837	2.01717e-05	0.0158836	-3.00219
cg40522879_BC21	cg40522879	Msh4	Msh4_Intron	0.000240646	0.878253	4.90669	2.02752e-05	0.0159228	-3.00726
cg31793073_BC21	cg31793073	Irx4	Irx4_Intron	-0.000216996	0.138102	-4.90329	2.04856e-05	0.0160243	-3.01749
cg40780530_TC21	cg40780530	Tmem215	Tmem215_Intergenic_upstream	0.000284786	0.535611	4.90204	2.05635e-05	0.0160243	-3.02126
cg28849817_BC21	cg28849817	Elk3	Elk3_Intron	-0.000255266	0.149378	-4.90199	2.05668e-05	0.0160243	-3.02142
cg32068892_TC21	cg32068892	3110015C05Rik	3110015C05Rik_Promoter	0.000247334	0.557121	4.90104	2.06261e-05	0.0160283	-3.02427
cg33329134_BC21	cg33329134	Eif3h	Eif3h_Exon	0.000319984	0.899374	4.89754	2.08471e-05	0.0161576	-3.03484
cg31593590_BC11	cg31593590	Gadd45g	Gadd45g_Intergenic_downstream	-0.000224103	0.0768414	-4.89414	2.10636e-05	0.0162459	-3.04508
cg28806522_BC11	cg28806522	Dram1	Dram1_Intron	0.000568303	0.834155	4.89403	2.10708e-05	0.0162459	-3.04542
cg31968996_BC21	cg31968996	2310020H05Rik	2310020H05Rik_Intron	0.000248316	0.626128	4.8923	2.11816e-05	0.0162762	-3.05061
cg31772989_BC21	cg31772989	Ice1	Ice1_Intron	0.000245635	0.522029	4.8917	2.122e-05	0.0162762	-3.05241
cg40815773_BC21	cg40815773	Rnf38	Rnf38_Intergenic_downstream	0.000321345	0.551837	4.88571	2.16103e-05	0.0165327	-3.07047
cg43693918_TC21	cg43693918	Iqsec1	Iqsec1_fiveUTR	-0.000340471	0.106649	-4.88227	2.18374e-05	0.0166634	-3.08084
cg35025120_BC21	cg35025120	Satb1	Satb1_fiveUTR	-0.000123947	0.0356716	-4.88131	2.19009e-05	0.0166689	-3.08371
cg42768101_BC21	cg42768101	Vps37b	Vps37b_Intron	-0.000239007	0.150365	-4.87836	2.20979e-05	0.0167294	-3.09259
cg43961708_TC21	cg43961708	Ptpn6	Ptpn6_Intron	-9.13132e-05	0.0271544	-4.87827	2.21045e-05	0.0167294	-3.09288
cg47229627_TC21	cg47229627	Lsmem2	Lsmem2_Promoter	0.000320465	0.734847	4.87759	2.21499e-05	0.0167294	-3.09492
cg38064689_TC21	cg38064689	Pfkfb3	Pfkfb3_Exon	0.000195072	0.574659	4.87559	2.22848e-05	0.0167884	-3.10093
cg37581058_TC21	cg37581058	Pla2g4a	Pla2g4a_Intron	0.000266152	0.86278	4.87472	2.23436e-05	0.01679	-3.10355
cg42041077_BC21	cg42041077	Sorcs2	Sorcs2_Intron	0.00022269	0.820452	4.87207	2.25242e-05	0.016827	-3.11153
cg34783762_BC21	cg34783762	Anks1	Anks1_fiveUTR	-0.000173009	0.0619241	-4.87172	2.25483e-05	0.016827	-3.11258
cg40796095_BC11	cg40796095	Ccl27a	Ccl27a_Intron	0.000437273	0.825919	4.8715	2.25633e-05	0.016827	-3.11324
cg29237409_BC11	cg29237409	Abca13	Abca13_Promoter	0.000289165	0.764472	4.8677	2.28253e-05	0.0168913	-3.12468
cg30536355_TC21	cg30536355	Hdac9	Hdac9_threeUTR	0.000309557	0.326081	4.86736	2.28493e-05	0.0168913	-3.12573
cg31561844_BC11	cg31561844	Ptpdc1	Ptpdc1_Intron	0.000267334	0.812554	4.86698	2.28751e-05	0.0168913	-3.12684
cg41682843_BC11	cg41682843	Fbxo2	Fbxo2_Intergenic_downstream	0.000242981	0.587049	4.86695	2.28777e-05	0.0168913	-3.12696
cg41214181_TC21	cg41214181	Oma1	Oma1_Promoter	-8.39872e-05	0.0420618	-4.86411	2.30756e-05	0.0169924	-3.13549
cg28413840_BC11	cg28413840	F930017D23Rik	F930017D23Rik_Intron	0.000225577	0.877257	4.86334	2.31294e-05	0.0169924	-3.1378
cg47638348_BC11	cg47638348	Mir363	Mir363_Intergenic_downstream	0.000346337	0.901605	4.86192	2.32296e-05	0.0169986	-3.14208
cg44986405_BC21	cg44986405	Ampd3	Ampd3_Intron	0.000469379	0.837691	4.86159	2.32527e-05	0.0169986	-3.14306
cg40040232_TC21	cg40040232	Rorc	Rorc_Promoter	0.000211301	0.612396	4.85933	2.34131e-05	0.0170737	-3.14988
cg42532125_TC21	cg42532125	Lrrc8d	Lrrc8d_Intron	-0.000128006	0.0472872	-4.85802	2.35066e-05	0.0170998	-3.15382
cg37269001_TC21	cg37269001	4930533P14Rik	4930533P14Rik_Promoter	0.000216485	0.494412	4.85478	2.3739e-05	0.01719	-3.16357
cg34976201_TC11	cg34976201	Trerf1	Trerf1_Intergenic_upstream	0.000221226	0.967387	4.85467	2.37468e-05	0.01719	-3.1639
cg46688351_BC21	cg46688351	Dscaml1	Dscaml1_Intron	0.000228304	0.492596	4.85199	2.39408e-05	0.0172882	-3.17196
cg46079767_BC21	cg46079767	4933400L20Rik	4933400L20Rik_Intergenic_upstream	0.000312985	0.712492	4.85085	2.40235e-05	0.0173057	-3.17537
cg45455451_BC11	cg45455451	Defb50	Defb50_Promoter	0.000181024	0.551248	4.84791	2.42389e-05	0.0174184	-3.18421
cg42003317_TC11	cg42003317	Yes1	Yes1_Intron	0.000252181	0.847681	4.8449	2.44617e-05	0.0175228	-3.19328
cg47354169_TC11	cg47354169	Acvr2b	Acvr2b_Exon	0.000175274	0.936028	4.84395	2.4532e-05	0.0175228	-3.19612
cg46614941_BC11	cg46614941	Olfr145	Olfr145_fiveUTR	0.000364603	0.555207	4.84355	2.45616e-05	0.0175228	-3.19732
cg31511561_TC21	cg31511561	Cd83	Cd83_Intergenic_downstream	0.00029003	0.858712	4.84242	2.46467e-05	0.0175412	-3.20074
cg41255345_BC11	cg41255345	Glis1	Glis1_Intron	0.000254803	0.93614	4.8373	2.5032e-05	0.0177638	-3.21611
cg32908755_BC21	cg32908755	Slitrk6	Slitrk6_Exon	0.00030845	0.630518	4.83478	2.52242e-05	0.0177638	-3.22368
cg41284903_BC11	cg41284903	Agbl4	Agbl4_Intron	0.000220314	0.909413	4.83453	2.52439e-05	0.0177638	-3.22446
cg39973310_BC21	cg39973310	Lrba	Lrba_Exon	-0.00024103	0.0912363	-4.8337	2.53076e-05	0.0177638	-3.22695
cg45060597_BC21	cg45060597	Acsm3	Acsm3_Promoter	-0.000246435	0.551752	-4.83368	2.53086e-05	0.0177638	-3.22699
cg43561560_BC21	cg43561560	Tcf7l1	Tcf7l1_Intron	0.000273481	0.721049	4.83354	2.53195e-05	0.0177638	-3.22742
cg31792683_TC21	cg31792683	Irx4	Irx4_Intergenic_upstream	0.000281946	0.544116	4.83093	2.55209e-05	0.017837	-3.23526
cg37235414_BC11	cg37235414	Hdac4	Hdac4_Intergenic_downstream	0.000280517	0.843778	4.83063	2.55443e-05	0.017837	-3.23617
cg40797976_BO21	cg40797976	Fam205a2	Fam205a2_Exon	0.000183999	0.525936	4.82759	2.57807e-05	0.0179213	-3.24529
cg43591135_TC21	cg43591135	Reg3d	Reg3d_Promoter	0.000271045	0.609994	4.82752	2.57861e-05	0.0179213	-3.2455
cg45821178_BC21	cg45821178	1700026F02Rik	1700026F02Rik_Intron	0.000255007	0.536478	4.82529	2.59612e-05	0.0180008	-3.2522
cg34608493_BC11	cg34608493	Fndc1	Fndc1_Intron	0.000254985	0.711831	4.82165	2.62494e-05	0.0181277	-3.26314
cg40796120_BC11	cg40796120	Ccl27a	Ccl27a_Intron	0.000185354	0.901858	4.82144	2.62666e-05	0.0181277	-3.26379
cg34028568_BC21	cg34028568	Tprg	Tprg_Intergenic_upstream	0.00032242	0.883488	4.81987	2.63914e-05	0.0181714	-3.26848
cg35336389_BC21	cg35336389	Kcnk12	Kcnk12_Promoter	-0.000136761	0.0445128	-4.81828	2.65192e-05	0.018217	-3.27326
cg44858840_BC21	cg44858840	Gm15501	Gm15501_Exon	-0.000157497	0.107867	-4.81617	2.66893e-05	0.0182915	-3.27959
cg40131048_BC21	cg40131048	Syt6	Syt6_Intergenic_downstream	0.000270782	0.855409	4.81408	2.6859e-05	0.0183652	-3.28587
cg36347537_TC21	cg36347537	Ankrd1	Ankrd1_Intron	-0.000124446	0.0535738	-4.80724	2.7422e-05	0.018609	-3.30641
cg29717535_BC11	cg29717535	Slc16a13	Slc16a13_Exon	-0.000105037	0.0238121	-4.80695	2.74463e-05	0.018609	-3.30728
cg32250375_TC21	cg32250375	Adk	Adk_Intron	0.000314733	0.880466	4.80677	2.74609e-05	0.018609	-3.30781
cg39137613_BC11	cg39137613	Bpifb1	Bpifb1_Exon	0.000301976	0.809607	4.80619	2.75095e-05	0.018609	-3.30956
cg31837594_BC21	cg31837594	9330111N05Rik	9330111N05Rik_Intron	0.000267318	0.859077	4.80595	2.75298e-05	0.018609	-3.31029
cg46106444_BC11	cg46106444	Nfatc3	Nfatc3_Promoter	-0.000278435	0.068933	-4.80155	2.78989e-05	0.0187753	-3.32347
cg30841926_BC21	cg30841926	Plekhh1	Plekhh1_Intron	0.000293979	0.526327	4.80151	2.79026e-05	0.0187753	-3.32361
cg38034662_TC11	cg38034662	Celf2	Celf2_Intron	0.000272072	0.848707	4.80019	2.80147e-05	0.018808	-3.32758
cg28594167_BC11	cg28594167	Arid5b	Arid5b_Intron	0.000301226	0.942802	4.79801	2.82003e-05	0.0188897	-3.33411
cg40137763_BC21	cg40137763	Lrig2	Lrig2_Intron	0.000308511	0.813666	4.79677	2.83063e-05	0.0189179	-3.33783
cg42897684_BC21	cg42897684	Ssc4d	Ssc4d_Exon	0.000260017	0.627572	4.7927	2.86578e-05	0.0191097	-3.35004
cg42896848_TC21	cg42896848	Hspb1	Hspb1_Intergenic_downstream	0.000216685	0.282182	4.79055	2.88454e-05	0.01916	-3.3565
cg42899857_TC21	cg42899857	Rasa4	Rasa4_Exon	0.000240262	0.792207	4.79035	2.88627e-05	0.01916	-3.35709
cg33323110_BC21	cg33323110	Trps1	Trps1_Intron	0.00026473	0.932761	4.78886	2.89932e-05	0.0192036	-3.36156
cg41613989_BC21	cg41613989	Arhgef10l	Arhgef10l_fiveUTR	0.000316993	0.745557	4.78755	2.91088e-05	0.0192371	-3.3655
cg34746752_BC21	cg34746752	Gm33727	Gm33727_Intron	0.000329456	0.69722	4.78277	2.95333e-05	0.0194742	-3.37983
cg40388019_TC21	cg40388019	Dnajb14	Dnajb14_Intron	0.000311064	0.852624	4.78193	2.96088e-05	0.0194806	-3.38235
cg43853591_BC21	cg43853591	Cpne9	Cpne9_threeUTR	-0.000272648	0.228831	-4.78053	2.97347e-05	0.0194949	-3.38655
cg42891278_BC21	cg42891278	Hip1	Hip1_fiveUTR	-0.000264348	0.125348	-4.78022	2.97622e-05	0.0194949	-3.38747
cg35064308_BC21	cg35064308	Slc25a23	Slc25a23_threeUTR	0.000247772	0.894034	4.77567	3.01751e-05	0.0197217	-3.4011
cg31850032_TC21	cg31850032	Mef2c	Mef2c_Intron	-0.000374674	0.133119	-4.7743	3.03006e-05	0.0197601	-3.40521
cg46867218_TC11	cg46867218	Lctl	Lctl_Intron	0.000189247	0.474142	4.77134	3.05735e-05	0.0198943	-3.41408
cg43529899_BC21	cg43529899	4930515G16Rik	4930515G16Rik_Intergenic_upstream	0.000322171	0.729887	4.76812	3.0873e-05	0.0200039	-3.42373
cg42731602_BC21	cg42731602	Aldh2	Aldh2_Intron	-0.000145904	0.0662954	-4.76808	3.08771e-05	0.0200039	-3.42386
cg33602356_BC21	cg33602356	Ttll1	Ttll1_Promoter	-0.000158075	0.137525	-4.76611	3.10618e-05	0.0200537	-3.42976
cg46377249_TC21	cg46377249	Mir21c	Mir21c_Intergenic_downstream	0.000280574	0.806733	4.76582	3.10894e-05	0.0200537	-3.43064
cg31419551_BC21	cg31419551	Serpinb6c	Serpinb6c_Intron	0.000325842	0.679553	4.76429	3.12331e-05	0.0200885	-3.4352
cg31733135_BC21	cg31733135	Nlrp4f	Nlrp4f_Intron	0.000263141	0.186848	4.76381	3.12792e-05	0.0200885	-3.43666
cg33273128_TC21	cg33273128	Gm33301	Gm33301_Intergenic_downstream	0.000223106	0.692772	4.76182	3.14675e-05	0.0201658	-3.4426
cg41462752_BC21	cg41462752	Ptp4a2	Ptp4a2_Intron	0.000262312	0.738533	4.75632	3.19962e-05	0.0204236	-3.45908
cg41533488_TC11	cg41533488	Runx3	Runx3_Promoter	0.000129147	0.976879	4.7562	3.20078e-05	0.0204236	-3.45944
cg32589378_TC21	cg32589378	4930578I06Rik	4930578I06Rik_Promoter	0.000229903	0.735802	4.75443	3.21798e-05	0.0204892	-3.46474
cg32025248_TC21	cg32025248	Htr1a	Htr1a_Intergenic_downstream	0.000329015	0.542571	4.75319	3.23005e-05	0.0205219	-3.46845
cg46339587_BC21	cg46339587	Capn9	Capn9_Exon	0.000250797	0.381161	4.75203	3.24139e-05	0.0205499	-3.47191
cg44523035_TC21	cg44523035	Fut1	Fut1_Exon	0.000205914	0.803186	4.75113	3.25025e-05	0.020562	-3.47461
cg30794929_BC21	cg30794929	Prkch	Prkch_Intron	0.000332261	0.812614	4.74916	3.26971e-05	0.0205932	-3.48052
cg41694450_BC21	cg41694450	Casz1	Casz1_Intron	-0.000198674	0.104073	-4.74883	3.27298e-05	0.0205932	-3.48151
cg40074440_BC21	cg40074440	Bcl9	Bcl9_Promoter	-0.000186776	0.190581	-4.7474	3.2872e-05	0.0205932	-3.4858
cg34640929_BC21	cg34640929	Prkn	Prkn_Intron	0.000244511	0.517448	4.74732	3.28801e-05	0.0205932	-3.48604
cg29971609_BC21	cg29971609	Abi3	Abi3_Exon	-0.000116855	0.0811497	-4.74667	3.29449e-05	0.0205932	-3.48799
cg33507291_TC21	cg33507291	Plec	Plec_Exon	-0.000268048	0.0785745	-4.74642	3.29692e-05	0.0205932	-3.48872
cg47500379_TC21	cg47500379	Mir222	Mir222_Intergenic_upstream	-0.000238557	0.104058	-4.74172	3.34417e-05	0.0208444	-3.50279
cg32204520_TC21	cg32204520	Il3ra	Il3ra_fiveUTR	0.000256462	0.853454	4.74064	3.3551e-05	0.0208686	-3.50602
cg37321557_BC21	cg37321557	Serpinb7	Serpinb7_fiveUTR	0.000327297	0.780912	4.73653	3.39708e-05	0.0210811	-3.51831
cg35882875_BC21	cg35882875	Tcf4	Tcf4_Exon	0.000330065	0.877346	4.7359	3.40351e-05	0.0210811	-3.52019
cg46042712_TC21	cg46042712	Got2	Got2_Intergenic_upstream	0.000356333	0.833609	4.73434	3.41969e-05	0.0211371	-3.52488
cg34087783_TC21	cg34087783	Slc51a	Slc51a_threeUTR	0.000210117	0.78927	4.73267	3.43699e-05	0.0211998	-3.52987
cg33044113_BC21	cg33044113	Egflam	Egflam_Intron	0.000203561	0.673024	4.73089	3.45553e-05	0.0212174	-3.53519
cg39288416_TC21	cg39288416	B4galt5	B4galt5_Intron	0.000303901	0.767774	4.73054	3.45923e-05	0.0212174	-3.53624
cg44673934_BC11	cg44673934	Ttc23	Ttc23_Intron	0.000300569	0.80096	4.72935	3.47166e-05	0.0212174	-3.53979
cg29604644_TC11	cg29604644	Nlrp3	Nlrp3_Intron	0.000153828	0.962116	4.72925	3.47267e-05	0.0212174	-3.54008
cg33548521_TC11	cg33548521	Pick1	Pick1_Intron	-0.000256382	0.186439	-4.72897	3.47568e-05	0.0212174	-3.54094
cg45835548_BC11	cg45835548	Eps15l1	Eps15l1_Intron	-0.000364501	0.189753	-4.72491	3.5186e-05	0.0214352	-3.55307
cg48020050_TC21	cg48020050	Drp2	Drp2_Intron	0.000268056	0.812201	4.72337	3.535e-05	0.0214411	-3.55767
cg28119999_BC21	cg28119999	Rmnd1	Rmnd1_Exon	0.000246044	0.691576	4.72319	3.53697e-05	0.0214411	-3.55822
cg41379530_BC21	cg41379530	Heyl	Heyl_Promoter	0.000218663	0.650962	4.72278	3.54128e-05	0.0214411	-3.55943
cg46862154_BC21	cg46862154	Smad3	Smad3_Intron	-0.000307397	0.146109	-4.72157	3.55435e-05	0.0214763	-3.56307
cg46883331_BC21	cg46883331	Pif1	Pif1_Exon	0.000381607	0.786161	4.72001	3.57108e-05	0.0214969	-3.56771
cg43615502_BC11	cg43615502	Hk2	Hk2_Exon	0.000233635	0.729541	4.7199	3.57229e-05	0.0214969	-3.56805
cg46174096_TC21	cg46174096	Bcar1	Bcar1_Promoter	-0.000185679	0.139879	-4.7178	3.59504e-05	0.0215899	-3.57432
cg46848853_BC21	cg46848853	Coro2b	Coro2b_Intron	0.000259033	0.713493	4.71645	3.60976e-05	0.0216344	-3.57836
cg41260056_TC21	cg41260056	4930407G08Rik	4930407G08Rik_Intron	0.000282988	0.842632	4.71561	3.61891e-05	0.0216455	-3.58087
cg35989256_BC21	cg35989256	Nfatc1	Nfatc1_Intron	0.000195127	0.919837	4.71324	3.64497e-05	0.0217574	-3.58796
cg29789708_TC21	cg29789708	Abhd15	Abhd15_threeUTR	-0.000108897	0.0434401	-4.71035	3.67694e-05	0.0219041	-3.59659
cg40796011_TO21	cg40796011	Il11ra1	Il11ra1_Exon	0.000181631	0.713464	4.7047	3.74024e-05	0.0220117	-3.61347
cg43055252_BC21	cg43055252	Katnal1	Katnal1_Exon	0.000436642	0.734653	4.70454	3.74206e-05	0.0220117	-3.61395
cg46302523_BC11	cg46302523	Galnt2	Galnt2_Intron	0.000327512	0.819148	4.70436	3.74411e-05	0.0220117	-3.61449
cg41521618_TC21	cg41521618	Extl1	Extl1_Intron	-0.000249529	0.0976683	-4.70411	3.74693e-05	0.0220117	-3.61523
cg43933400_TC11	cg43933400	Mical3	Mical3_Intron	0.000227606	0.740809	4.7031	3.75835e-05	0.0220117	-3.61824
cg47491254_TC21	cg47491254	Efhc2	Efhc2_Promoter	-0.00022734	0.106434	-4.70307	3.75874e-05	0.0220117	-3.61834
cg30161144_TC11	cg30161144	Kcnj16	Kcnj16_Intron	0.000192515	0.904727	4.70262	3.76385e-05	0.0220117	-3.61969
cg46095543_TC21	cg46095543	Nol3	Nol3_fiveUTR	-0.000126195	0.0342246	-4.70209	3.76987e-05	0.0220117	-3.62127
cg44398362_BC21	cg44398362	Ffar2	Ffar2_Intron	0.000188295	0.798136	4.70179	3.77328e-05	0.0220117	-3.62216
cg41590154_BC11	cg41590154	Rnf186	Rnf186_Intergenic_downstream	0.000168689	0.930753	4.70093	3.78307e-05	0.0220117	-3.62472
cg30696574_BC21	cg30696574	Mia2	Mia2_fiveUTR	-0.000114357	0.0372209	-4.70084	3.78414e-05	0.0220117	-3.625
cg39234121_TC11	cg39234121	Hnf4a	Hnf4a_Intron	0.000183674	0.915101	4.70083	3.78423e-05	0.0220117	-3.62503
cg39682700_BC11	cg39682700	Larp1b	Larp1b_Intron	0.000227367	0.678613	4.69985	3.79546e-05	0.0220338	-3.62795
cg29892455_BC21	cg29892455	Sept4	Sept4_Intron	0.000214693	0.869088	4.69413	3.86166e-05	0.0223715	-3.64505
cg30698221_BC21	cg30698221	Fbxo33	Fbxo33_Intergenic_upstream	0.000343739	0.730164	4.69282	3.87694e-05	0.0223715	-3.64895
cg37528864_TC21	cg37528864	Mir181a-1	Mir181a-1_Intergenic_upstream	0.000352225	0.694443	4.69253	3.88029e-05	0.0223715	-3.6498
cg30317245_BC21	cg30317245	Dnmt3a	Dnmt3a_Intron	-0.000190762	0.909276	-4.69223	3.88386e-05	0.0223715	-3.65071
cg44549081_BC21	cg44549081	Mrgprx1	Mrgprx1_Intergenic_upstream	0.000326312	0.50928	4.69126	3.89531e-05	0.0223744	-3.65362
cg30377397_TC11	cg30377397	4921511I17Rik	4921511I17Rik_Intergenic_upstream	0.000367945	0.53478	4.69064	3.90254e-05	0.0223744	-3.65545
cg34708968_BC21	cg34708968	Zfp948	Zfp948_Promoter	-0.000165434	0.0488878	-4.69026	3.90704e-05	0.0223744	-3.65659
cg32652813_TC21	cg32652813	Hr	Hr_Intron	-0.000122704	0.0674697	-4.6871	3.94451e-05	0.0225454	-3.66602
cg39268453_TC21	cg39268453	Ncoa3	Ncoa3_Intergenic_upstream	-0.000133992	0.0401362	-4.68451	3.97552e-05	0.0226789	-3.67376
cg41361784_BC21	cg41361784	Scmh1	Scmh1_Intron	0.000252426	0.775851	4.68371	3.9851e-05	0.0226898	-3.67614
cg46903999_BC21	cg46903999	C2cd4a	C2cd4a_Promoter	-0.000225471	0.0888886	-4.67978	4.03263e-05	0.0228881	-3.68786
cg45949420_TC21	cg45949420	N4bp1	N4bp1_Intergenic_upstream	0.000272047	0.791855	4.67956	4.03539e-05	0.0228881	-3.68853
cg45145371_BC21	cg45145371	Rgs10	Rgs10_Intron	-0.000101095	0.0321228	-4.67788	4.05584e-05	0.0228908	-3.69353
cg41521995_TC21	cg41521995	Extl1	Extl1_Promoter	0.000255448	0.859604	4.67655	4.07219e-05	0.0228908	-3.6975
cg37629781_TC21	cg37629781	4930532M18Rik	4930532M18Rik_Intron	0.000325732	0.876815	4.67584	4.08098e-05	0.0228908	-3.69963
cg30018742_BC21	cg30018742	Rara	Rara_Intron	-0.000252942	0.125368	-4.67539	4.08653e-05	0.0228908	-3.70098
cg33904789_BC21	cg33904789	Ciita	Ciita_fiveUTR	0.000383982	0.592784	4.67529	4.08772e-05	0.0228908	-3.70126
cg42480538_TC11	cg42480538	Plac8	Plac8_Intron	-0.000155099	0.0481131	-4.67462	4.09595e-05	0.0228908	-3.70325
cg41228449_BC21	cg41228449	Prkaa2	Prkaa2_Intron	0.000301196	0.872108	4.67448	4.09771e-05	0.0228908	-3.70368
cg35594827_TC21	cg35594827	Ube2d2a	Ube2d2a_Intron	-0.000373778	0.139932	-4.67405	4.10307e-05	0.0228908	-3.70497
cg42883035_TC21	cg42883035	Cldn13	Cldn13_Exon	0.000268553	0.765517	4.67385	4.10545e-05	0.0228908	-3.70554
cg45588013_TC21	cg45588013	Trmt9b	Trmt9b_Intergenic_downstream	0.000215551	0.593322	4.67235	4.12413e-05	0.0229517	-3.71003
cg43927219_TC21	cg43927219	Hdhd5	Hdhd5_Intergenic_upstream	0.000317777	0.885343	4.66879	4.16874e-05	0.0231559	-3.72066
cg38186342_BC21	cg38186342	Fcnb	Fcnb_fiveUTR	0.000322427	0.700087	4.66817	4.17646e-05	0.0231559	-3.72248
cg42728873_TC21	cg42728873	Trafd1	Trafd1_Promoter	0.000287636	0.696164	4.66685	4.19316e-05	0.023205	-3.72643
cg42030947_TC21	cg42030947	Hmx1	Hmx1_Intergenic_downstream	-0.000336983	0.329771	-4.66321	4.23944e-05	0.0234174	-3.73727
cg28688415_BC11	cg28688415	Tspear	Tspear_Intron	0.000256382	0.575576	4.65876	4.29678e-05	0.0236495	-3.75054
cg33520503_BC21	cg33520503	Mb	Mb_Intron	0.000172383	0.651189	4.65871	4.29743e-05	0.0236495	-3.75069
cg43325976_BC21	cg43325976	D630045J12Rik	D630045J12Rik_Promoter	-0.000184681	0.0582339	-4.65712	4.3181e-05	0.0236801	-3.75543
cg30526420_TC21	cg30526420	4933406C10Rik	4933406C10Rik_Intergenic_downstream	0.000304259	0.675743	4.65695	4.32029e-05	0.0236801	-3.75593
cg41232345_TC21	cg41232345	Plpp3	Plpp3_Intergenic_downstream	0.000256331	0.850045	4.65644	4.327e-05	0.0236801	-3.75746
cg29587487_BC21	cg29587487	Cnot8	Cnot8_Promoter	-0.000249438	0.0926094	-4.65551	4.33909e-05	0.0237025	-3.76022
cg40894080_BC21	cg40894080	AI427809	AI427809_Intergenic_upstream	-0.000317729	0.109993	-4.65362	4.36392e-05	0.0237942	-3.76586
cg34012601_BC21	cg34012601	St6gal1	St6gal1_Intron	-0.000215656	0.131863	-4.65115	4.39663e-05	0.0239285	-3.77323
cg28421583_BC21	cg28421583	Prdm1	Prdm1_Intergenic_downstream	0.000409446	0.851048	4.64983	4.41407e-05	0.0239531	-3.77714
cg28717058_TC21	cg28717058	Gamt	Gamt_Exon	-0.000348453	0.405068	-4.64959	4.41733e-05	0.0239531	-3.77787
cg29961816_TC21	cg29961816	Dlx3	Dlx3_Intergenic_downstream	-0.000189008	0.123606	-4.64838	4.43345e-05	0.0239665	-3.78147
cg28849487_TC21	cg28849487	Elk3	Elk3_Intron	0.000287426	0.863977	4.64819	4.43599e-05	0.0239665	-3.78203
cg30350415_BC11	cg30350415	Rhob	Rhob_Promoter	0.000571776	0.7467	4.64473	4.48256e-05	0.024174	-3.79235
cg45383511_BC21	cg45383511	Sox1ot	Sox1ot_Intergenic_upstream	0.000245184	0.673653	4.64352	4.49888e-05	0.0242179	-3.79594
cg42598040_BC21	cg42598040	Asphd2	Asphd2_fiveUTR	0.000324621	0.534874	4.64183	4.52192e-05	0.0242923	-3.80098
cg47305722_TC21	cg47305722	Osbpl10	Osbpl10_Intron	0.000394721	0.815092	4.6413	4.52911e-05	0.0242923	-3.80255
cg42592267_TC21	cg42592267	E130006D01Rik	E130006D01Rik_Intergenic_upstream	0.000384916	0.797316	4.64056	4.53925e-05	0.0243026	-3.80476
cg33378329_BC11	cg33378329	Anxa13	Anxa13_Promoter	0.000340641	0.903134	4.6374	4.58262e-05	0.0244503	-3.81415
cg34774306_BC21	cg34774306	Grm4	Grm4_threeUTR	0.000192686	0.657006	4.63735	4.58335e-05	0.0244503	-3.81431
cg28115899_TC21	cg28115899	Mthfd1l	Mthfd1l_Intron	-0.000236278	0.10234	-4.63441	4.62411e-05	0.024582	-3.82305
cg44191089_TC21	cg44191089	Eps8l1	Eps8l1_threeUTR	-0.000289241	0.389769	-4.63438	4.62464e-05	0.024582	-3.82316
cg38847038_BC21	cg38847038	Gm13985	Gm13985_Intergenic_downstream	0.000373894	0.519957	4.63337	4.6387e-05	0.0246125	-3.82616
cg44653537_TC21	cg44653537	1810008I18Rik	1810008I18Rik_Promoter	0.000285293	0.891426	4.63016	4.68378e-05	0.0248073	-3.83571
cg29691462_TC11	cg29691462	Pik3r6	Pik3r6_Intron	0.000154101	0.944063	4.6279	4.71585e-05	0.0249205	-3.84245
cg40796370_BO11	cg40796370	Ccl27a	Ccl27a_Exon	0.000135759	0.680601	4.62746	4.722e-05	0.0249205	-3.84373
cg42096425_TC21	cg42096425	Prom1	Prom1_Intron	0.000230972	0.767404	4.62628	4.73885e-05	0.024965	-3.84725
cg34662726_TC11	cg34662726	Gm7168	Gm7168_Intron	0.000199231	0.635937	4.62469	4.76157e-05	0.0250401	-3.85197
cg44659665_TC21	cg44659665	Lrrk1	Lrrk1_Exon	0.000380569	0.868805	4.62381	4.77428e-05	0.0250422	-3.8546
cg31888482_BC11	cg31888482	Atg10	Atg10_Intron	0.000281562	0.853326	4.62349	4.77888e-05	0.0250422	-3.85555
cg28151528_TC21	cg28151528	Ust	Ust_Intron	0.000344287	0.798385	4.62277	4.78918e-05	0.0250518	-3.85768
cg43071918_BC21	cg43071918	Fry	Fry_Intron	0.000266786	0.784166	4.62169	4.80482e-05	0.0250893	-3.8609
cg44765820_BC21	cg44765820	Plin1	Plin1_fiveUTR	0.000308325	0.719894	4.62083	4.81734e-05	0.0251104	-3.86347
cg39886136_TC21	cg39886136	Sis	Sis_Exon	0.000317219	0.706233	4.61941	4.83797e-05	0.0251736	-3.86769
cg28423294_TC21	cg28423294	Prdm1	Prdm1_Exon	0.000380313	0.807381	4.61814	4.85646e-05	0.0252193	-3.87145
cg35649497_TC21	cg35649497	Grxcr2	Grxcr2_Exon	0.000287968	0.540261	4.61764	4.86379e-05	0.0252193	-3.87294
cg34032310_BC21	cg34032310	Trp63	Trp63_Intron	0.000273725	0.789519	4.61592	4.88903e-05	0.0252967	-3.87805
cg43931857_BC21	cg43931857	Mical3	Mical3_Intron	-0.000288025	0.292297	-4.61521	4.89951e-05	0.0252967	-3.88017
cg38964938_BC21	cg38964938	4930402H24Rik	4930402H24Rik_Exon	0.000344269	0.796302	4.6148	4.90562e-05	0.0252967	-3.8814
cg31622245_BC11	cg31622245	Cplx2	Cplx2_Exon	0.00018667	0.895965	4.61431	4.9129e-05	0.0252967	-3.88286
cg45424420_TC21	cg45424420	Csmd1	Csmd1_Intergenic_downstream	-0.000263806	0.658292	-4.61325	4.92864e-05	0.0253303	-3.88602
cg28211096_BC11	cg28211096	Gm20125	Gm20125_Intergenic_downstream	0.000322224	0.831341	4.61256	4.93882e-05	0.0253303	-3.88805
cg29295759_BC21	cg29295759	Spred2	Spred2_Exon	0.000188514	0.818677	4.61214	4.94508e-05	0.0253303	-3.8893
cg35596130_TC11	cg35596130	Cxxc5	Cxxc5_Intron	-0.000145249	0.0468081	-4.61005	4.9763e-05	0.025415	-3.89552
cg42710083_BC11	cg42710083	Rbm19	Rbm19_Intergenic_upstream	0.000257027	0.845506	4.60911	4.99048e-05	0.025415	-3.89833
cg36336521_TC21	cg36336521	Lipa	Lipa_Intron	0.000362123	0.727171	4.60886	4.99412e-05	0.025415	-3.89904
cg35757326_TC21	cg35757326	Lmnb1	Lmnb1_Intergenic_upstream	0.000420394	0.837806	4.60874	4.99596e-05	0.025415	-3.89941
cg36972490_BC21	cg36972490	Trak2	Trak2_Intron	-0.000277931	0.431208	-4.60804	5.00658e-05	0.0254254	-3.9015
cg45728937_TC11	cg45728937	2500002B13Rik	2500002B13Rik_Intron	0.000392603	0.899474	4.60678	5.02555e-05	0.025478	-3.90524
cg38215676_BC11	cg38215676	Ptpa	Ptpa_fiveUTR	-5.88274e-05	0.0186251	-4.60412	5.0659e-05	0.0256387	-3.91313
cg32504138_BC11	cg32504138	Myh6	Myh6_Promoter	0.000226943	0.876207	4.60289	5.08471e-05	0.0256899	-3.91679
cg46031191_BC11	cg46031191	Adgrg1	Adgrg1_Intron	-0.000373122	0.126256	-4.60184	5.1008e-05	0.0256947	-3.91991
cg37460040_BC21	cg37460040	Rab7b	Rab7b_Promoter	0.000226167	0.404716	4.6017	5.10301e-05	0.0256947	-3.92033
cg30062666_TC11	cg30062666	Ubtf	Ubtf_Exon	0.000252231	0.382602	4.60017	5.12658e-05	0.0257276	-3.92488
cg46517985_TC21	cg46517985	Npsr1	Npsr1_Intron	0.000279934	0.849111	4.60015	5.12693e-05	0.0257276	-3.92495
cg33789747_BC21	cg33789747	Fmnl3	Fmnl3_Intron	0.000293095	0.740223	4.59893	5.14568e-05	0.025778	-3.92855
cg32354856_TC21	cg32354856	Wdfy4	Wdfy4_Intron	0.000163123	0.938656	4.59783	5.16277e-05	0.0257835	-3.93182
cg32494587_TC11	cg32494587	Olfr49	Olfr49_Promoter	0.00017121	0.848441	4.59748	5.16816e-05	0.0257835	-3.93285
cg42514449_BC21	cg42514449	Aff1	Aff1_Intron	-0.00015353	0.0407936	-4.597	5.17576e-05	0.0257835	-3.9343
cg38418631_TC11	cg38418631	Acvr1c	Acvr1c_Intergenic_upstream	0.000186525	0.930788	4.59662	5.18161e-05	0.0257835	-3.93542
cg30891956_TC21	cg30891956	Acot1	Acot1_Intergenic_downstream	0.000398904	0.82867	4.59527	5.20279e-05	0.0258254	-3.93944
cg28737471_TC21	cg28737471	Tjp3	Tjp3_fiveUTR	-0.000281275	0.209599	-4.59465	5.21242e-05	0.0258254	-3.94127
cg37186003_BC21	cg37186003	Prss56	Prss56_Exon	-0.000174182	0.123022	-4.59401	5.22248e-05	0.0258254	-3.94317
cg41459268_TC11	cg41459268	Lck	Lck_fiveUTR	-0.000491077	0.178837	-4.59312	5.23653e-05	0.0258254	-3.94582
cg41955804_TC21	cg41955804	Dpp6	Dpp6_Intron	0.00047237	0.574292	4.5927	5.24304e-05	0.0258254	-3.94705
cg40796202_BC11	cg40796202	Ccl27a	Ccl27a_Promoter	0.000247489	0.717757	4.59262	5.24441e-05	0.0258254	-3.9473
cg35847410_TC11	cg35847410	Ccbe1	Ccbe1_Intron	0.00037162	0.611185	4.5922	5.25108e-05	0.0258254	-3.94856
cg34110418_BC21	cg34110418	Kalrn	Kalrn_Intron	0.000223193	0.551405	4.58829	5.31309e-05	0.026087	-3.96014
cg29300093_TC11	cg29300093	Rab1a	Rab1a_Intergenic_upstream	0.000266487	0.853148	4.58454	5.37338e-05	0.0263102	-3.97128
cg36431237_TC21	cg36431237	Scd4	Scd4_Promoter	0.000391329	0.749739	4.58436	5.37632e-05	0.0263102	-3.97182
cg35985800_TC21	cg35985800	Kcng2	Kcng2_Promoter	0.000163449	0.866805	4.58376	5.38609e-05	0.0263145	-3.97361
cg32400578_TC21	cg32400578	Sh2d4b	Sh2d4b_Intergenic_downstream	0.000266175	0.606369	4.58307	5.39722e-05	0.0263255	-3.97564
cg34032040_BC21	cg34032040	Trp63	Trp63_Intron	0.000230658	0.907691	4.58197	5.41515e-05	0.0263483	-3.97892
cg38571032_BC21	cg38571032	Agps	Agps_Promoter	0.000258982	0.873115	4.58169	5.4197e-05	0.0263483	-3.97974
cg39288507_TC21	cg39288507	B4galt5	B4galt5_Intron	0.000388125	0.711446	4.58104	5.43031e-05	0.0263566	-3.98167
cg42977417_TC21	cg42977417	Slc29a4	Slc29a4_Intron	0.000229915	0.711763	4.57987	5.44939e-05	0.0264059	-3.98513
cg37862023_BC21	cg37862023	Cnih3	Cnih3_Intron	0.000165825	0.423941	4.57805	5.47935e-05	0.0264724	-3.99054
cg34826605_TC11	cg34826605	Abcg1	Abcg1_Intron	-0.000441474	0.115727	-4.57773	5.48472e-05	0.0264724	-3.99151
cg44109736_TC21	cg44109736	Slco1a5	Slco1a5_Intron	0.000266568	0.698862	4.57741	5.48994e-05	0.0264724	-3.99245
cg45949432_TC11	cg45949432	N4bp1	N4bp1_Exon	-0.000135042	0.0298186	-4.57567	5.51877e-05	0.0265682	-3.99761
cg36911097_TC21	cg36911097	Tmeff2	Tmeff2_Intergenic_upstream	0.000396373	0.753812	4.5738	5.5499e-05	0.0266747	-4.00316
cg34462095_TC21	cg34462095	Krtap11-1	Krtap11-1_Intergenic_upstream	0.000237433	0.498725	4.5728	5.56657e-05	0.0267114	-4.00612
cg43251764_TC21	cg43251764	Irf5	Irf5_Intron	-0.000108213	0.036143	-4.57165	5.5859e-05	0.0267608	-4.00954
cg41739484_BC11	cg41739484	Thap3	Thap3_Intron	0.000271606	0.773889	4.57043	5.60634e-05	0.0268153	-4.01314
cg33067833_BC21	cg33067833	Agxt2	Agxt2_Intron	0.000236464	0.92407	4.56962	5.62005e-05	0.0268375	-4.01555
cg29807002_BC11	cg29807002	Lgals9	Lgals9_Intron	-0.000197097	0.0482326	-4.56759	5.65446e-05	0.0269556	-4.02158
cg37678438_TC21	cg37678438	Rabgap1l	Rabgap1l_Intron	0.00037252	0.836849	4.56661	5.67106e-05	0.0269556	-4.02447
cg46295980_BC11	cg46295980	Galnt2	Galnt2_Intron	-0.000396348	0.393724	-4.56641	5.67447e-05	0.0269556	-4.02506
cg29938296_TC21	cg29938296	Car10	Car10_Intergenic_upstream	0.000314965	0.541547	4.56602	5.68119e-05	0.0269556	-4.02623
cg33715923_TC11	cg33715923	Prickle1	Prickle1_Exon	0.000238567	0.910478	4.56513	5.69639e-05	0.0269845	-4.02886
cg43692993_BC21	cg43692993	Slc41a3	Slc41a3_Intron	0.000142359	0.586208	4.55919	5.79901e-05	0.0274267	-4.04647
cg35028590_TC11	cg35028590	Gm19585	Gm19585_Intergenic_downstream	0.00035945	0.863571	4.55768	5.82539e-05	0.0274933	-4.05095
cg33609702_TC21	cg33609702	Efcab6	Efcab6_Intron	0.000202841	0.559573	4.55611	5.85292e-05	0.0274933	-4.0556
cg30589005_TC11	cg30589005	Gm33340	Gm33340_Intergenic_upstream	0.00033142	0.754892	4.55563	5.86141e-05	0.0274933	-4.05703
cg31115213_TC21	cg31115213	Begain	Begain_Exon	0.000248791	0.832904	4.55469	5.87798e-05	0.0274933	-4.05981
cg40480603_TC11	cg40480603	Adgrl2	Adgrl2_Intron	0.00044668	0.785799	4.55423	5.88607e-05	0.0274933	-4.06117
cg32765206_TC21	cg32765206	4930529K09Rik	4930529K09Rik_Intron	0.000466638	0.805483	4.55423	5.88615e-05	0.0274933	-4.06118
cg45441889_TC21	cg45441889	Mcph1	Mcph1_Intron	-0.000247373	0.127597	-4.55401	5.88999e-05	0.0274933	-4.06182
cg44283901_BC21	cg44283901	Rsph6a	Rsph6a_Intron	0.000256782	0.485163	4.55377	5.89423e-05	0.0274933	-4.06253
cg36395437_TC11	cg36395437	Pik3ap1	Pik3ap1_Intron	-0.000299408	0.0705376	-4.55347	5.89964e-05	0.0274933	-4.06344
cg39874865_TC21	cg39874865	Otol1	Otol1_Intergenic_upstream	0.000259102	0.889407	4.55311	5.90594e-05	0.0274933	-4.06449
cg41391306_BC21	cg41391306	1700057H15Rik	1700057H15Rik_Intron	0.000273154	0.687049	4.55051	5.95223e-05	0.0276652	-4.07219
cg38558158_BC21	cg38558158	Hoxd11	Hoxd11_Exon	-0.000384168	0.262198	-4.54984	5.96425e-05	0.0276777	-4.07418
cg29179044_TC21	cg29179044	Limk2	Limk2_Intron	-0.000188396	0.0959326	-4.54893	5.98065e-05	0.0277103	-4.07689
cg35370095_TC21	cg35370095	Adcyap1	Adcyap1_Intergenic_downstream	0.000242303	0.77345	4.5471	6.01355e-05	0.0277736	-4.0823
cg39460770_BC21	cg39460770	Pkia	Pkia_Intergenic_upstream	0.000544078	0.546321	4.54677	6.01957e-05	0.0277736	-4.08328
cg30030679_TC21	cg30030679	Krt36	Krt36_Exon	0.000289956	0.544999	4.54631	6.0279e-05	0.0277736	-4.08465
cg38895290_BC11	cg38895290	Slc28a2b	Slc28a2b_Intron	0.000293294	0.90949	4.5457	6.03888e-05	0.0277736	-4.08644
cg47571196_TC11	cg47571196	Cypt15	Cypt15_Exon	0.000316582	0.805163	4.54485	6.05425e-05	0.0277736	-4.08895
cg41560734_TC21	cg41560734	Epha8	Epha8_Intron	0.000271371	0.710694	4.54446	6.06136e-05	0.0277736	-4.0901
cg40095182_BC21	cg40095182	Spag17	Spag17_Exon	0.000308146	0.52095	4.54415	6.0671e-05	0.0277736	-4.09104
cg46618113_TC11	cg46618113	Olfr916	Olfr916_fiveUTR	0.000269963	0.576558	4.54402	6.06934e-05	0.0277736	-4.0914
cg41326565_BC21	cg41326565	Rnf220	Rnf220_Intron	0.000266058	0.785736	4.54112	6.12257e-05	0.0279593	-4.10001
cg43766273_BC21	cg43766273	Foxp1	Foxp1_Intron	-0.000262549	0.164977	-4.54078	6.12881e-05	0.0279593	-4.10101
cg35248074_TC21	cg35248074	Atl2	Atl2_Intergenic_downstream	0.000242415	0.571981	4.5382	6.17642e-05	0.0280055	-4.10864
cg28558004_TC11	cg28558004	Dnajc12	Dnajc12_threeUTR	0.000355617	0.782779	4.53784	6.18304e-05	0.0280055	-4.1097
cg37562440_TC21	cg37562440	Rgs2	Rgs2_Intergenic_downstream	-6.9015e-05	0.0237524	-4.53782	6.18343e-05	0.0280055	-4.10976
cg44338990_BC21	cg44338990	Cyp2b10	Cyp2b10_Intron	0.000361452	0.599454	4.53747	6.18992e-05	0.0280055	-4.1108
cg41001493_TC11	cg41001493	Brinp1	Brinp1_Intergenic_downstream	0.000391214	0.644634	4.53728	6.19347e-05	0.0280055	-4.11136
cg39484640_BC11	cg39484640	Pmp2	Pmp2_Intron	0.000245963	0.850598	4.53716	6.19569e-05	0.0280055	-4.11171
cg31956510_BC21	cg31956510	Arhgef28	Arhgef28_Intron	0.000238716	0.835996	4.53626	6.21258e-05	0.028039	-4.1144
cg30667299_TC21	cg30667299	Psma6	Psma6_Intron	-0.000234464	0.12569	-4.53472	6.24127e-05	0.0281256	-4.11894
cg30818918_TC21	cg30818918	Akap5	Akap5_Promoter	-0.000109708	0.0504082	-4.53342	6.26565e-05	0.0281926	-4.12278
cg43521452_TC21	cg43521452	Gng12	Gng12_Intron	0.000201406	0.812636	4.53281	6.27718e-05	0.0282016	-4.1246
cg41310119_TC11	cg41310119	Kncn	Kncn_fiveUTR	0.000194166	0.810681	4.53172	6.29785e-05	0.0282516	-4.12784
cg29150594_BC11	cg29150594	Lrp1	Lrp1_threeUTR	0.000411792	0.876733	4.53087	6.31386e-05	0.0282663	-4.13034
cg34514574_BC21	cg34514574	1700029J03Rik	1700029J03Rik_Intron	-0.000144354	0.0497924	-4.53053	6.32021e-05	0.0282663	-4.13133
cg46478386_BC21	cg46478386	Olfr39	Olfr39_Promoter	0.000357427	0.613772	4.52931	6.34353e-05	0.0283277	-4.13496
cg29102077_BC21	cg29102077	Mir6412	Mir6412_Intergenic_upstream	0.000378259	0.867873	4.52865	6.35606e-05	0.0283357	-4.13691
cg47620473_BC21	cg47620473	Igsf1	Igsf1_Intron	0.000442966	0.472606	4.52821	6.36445e-05	0.0283357	-4.13821
cg42043308_TC21	cg42043308	Tbc1d14	Tbc1d14_fiveUTR	-0.000347278	0.111139	-4.5244	6.43768e-05	0.0286027	-4.14948
cg31005336_TC21	cg31005336	Foxn3	Foxn3_Intron	-0.000191278	0.88064	-4.52409	6.44374e-05	0.0286027	-4.15041
cg40587295_TC21	cg40587295	Car8	Car8_Promoter	0.000226259	0.535192	4.523	6.46481e-05	0.0286532	-4.15363
cg28287353_TC11	cg28287353	Akap7	Akap7_Intron	0.000276625	0.866902	4.52242	6.4761e-05	0.0286604	-4.15535
cg43472180_TC21	cg43472180	Vmn1r18	Vmn1r18_Exon	0.000248202	0.830965	4.52178	6.48853e-05	0.0286725	-4.15724
cg37454495_BC21	cg37454495	Mapkapk2	Mapkapk2_Intron	0.000185416	0.668156	4.51988	6.52558e-05	0.0287933	-4.16285
cg29657638_TC21	cg29657638	Elac2	Elac2_Intergenic_upstream	0.000313071	0.707224	4.51865	6.5497e-05	0.0288567	-4.16648
cg30268644_TC21	cg30268644	Cbx8	Cbx8_Promoter	-0.000169888	0.108172	-4.51676	6.58693e-05	0.0289776	-4.17207
cg46916919_BC21	cg46916919	Rora	Rora_Intron	0.000328799	0.771551	4.51602	6.60156e-05	0.0289939	-4.17426
cg43397058_TC21	cg43397058	Ccdc126	Ccdc126_Intron	0.000304024	0.875243	4.51558	6.61023e-05	0.0289939	-4.17555
cg44867749_BC11	cg44867749	Tenm4	Tenm4_Intergenic_upstream	0.000253181	0.899561	4.5149	6.62368e-05	0.02901	-4.17755
cg34986164_TC21	cg34986164	Tfeb	Tfeb_Intron	0.000285618	0.809521	4.51298	6.66201e-05	0.0291347	-4.18324
cg43943428_TC21	cg43943428	Klrg1	Klrg1_Intergenic_upstream	0.000368577	0.805553	4.51169	6.68791e-05	0.0291648	-4.18706
cg43892940_TC11	cg43892940	Cxcl12	Cxcl12_Intergenic_downstream	0.000178223	0.925986	4.51134	6.69486e-05	0.0291648	-4.18809
cg40848833_BC21	cg40848833	Gabbr2	Gabbr2_Intron	-0.000166823	0.935179	-4.51113	6.69913e-05	0.0291648	-4.18872
cg40074537_BC21	cg40074537	Bcl9	Bcl9_Intergenic_upstream	0.000226562	0.789838	4.51049	6.71205e-05	0.0291648	-4.19061
cg31786515_TC21	cg31786515	Gm20554	Gm20554_Intergenic_downstream	0.00019273	0.843154	4.51018	6.71813e-05	0.0291648	-4.19151
cg39662756_BC21	cg39662756	Gm20755	Gm20755_Intron	-0.000575664	0.548787	-4.50876	6.7468e-05	0.0292108	-4.1957
cg32137181_TC21	cg32137181	Nnt	Nnt_Intergenic_downstream	0.000391699	0.538145	4.50822	6.75777e-05	0.0292108	-4.1973
cg39862528_BC21	cg39862528	Il12a	Il12a_Intron	-0.000138664	0.0662484	-4.50819	6.75834e-05	0.0292108	-4.19739
cg35611427_BC21	cg35611427	Gm37013	Gm37013_Intron	-0.000210915	0.135683	-4.50581	6.80674e-05	0.0293771	-4.20442
cg43906673_BC11	cg43906673	Cacna1c	Cacna1c_Intron	0.000292585	0.733522	4.50288	6.86687e-05	0.0295935	-4.21308
cg31451165_BC21	cg31451165	Rreb1	Rreb1_Intron	-0.000231075	0.0517723	-4.50176	6.88999e-05	0.02965	-4.2164
cg28599253_BC21	cg28599253	Cabcoco1	Cabcoco1_Intergenic_upstream	0.000423501	0.741014	4.49752	6.97806e-05	0.029958	-4.22891
cg46427682_TC21	cg46427682	Cntn5	Cntn5_Intergenic_upstream	0.000327698	0.689799	4.4968	6.99321e-05	0.029958	-4.23105
cg38638107_BC21	cg38638107	Prg2	Prg2_Intergenic_upstream	-0.000473586	0.222123	-4.49679	6.9934e-05	0.029958	-4.23107
cg34407905_TC21	cg34407905	Ncam2	Ncam2_Intergenic_upstream	0.000312196	0.715309	4.49638	7.00204e-05	0.029958	-4.23229
cg34667395_BC21	cg34667395	Smoc2	Smoc2_Intron	0.000280871	0.562691	4.49574	7.01548e-05	0.0299706	-4.23418
cg29955080_TC21	cg29955080	Acsf2	Acsf2_Intron	-0.000353804	0.222949	-4.49527	7.02524e-05	0.0299706	-4.23555
cg42615511_BC11	cg42615511	Cmklr1	Cmklr1_Promoter	-0.000128863	0.0356558	-4.49397	7.05278e-05	0.0300142	-4.2394
cg43347536_TC21	cg43347536	Olfr461	Olfr461_Intergenic_upstream	0.000279859	0.734136	4.49381	7.05619e-05	0.0300142	-4.23988
cg29531574_TC21	cg29531574	Olfr1373	Olfr1373_Promoter	0.000289512	0.534899	4.49329	7.06715e-05	0.0300142	-4.24141
cg38570557_BC21	cg38570557	Agps	Agps_Intergenic_upstream	-0.000377156	0.457684	-4.49287	7.07601e-05	0.0300142	-4.24264
cg28833776_TC21	cg28833776	4930534H03Rik	4930534H03Rik_Intergenic_upstream	0.000211494	0.840251	4.49071	7.12206e-05	0.0300676	-4.24903
cg40796876_TC11	cg40796876	Gm21541	Gm21541_Intergenic_upstream	0.000215631	0.808232	4.49012	7.13463e-05	0.0300676	-4.25077
cg43615500_TC21	cg43615500	Hk2	Hk2_Intron	0.00039971	0.811234	4.49009	7.13525e-05	0.0300676	-4.25086
cg38389649_TC21	cg38389649	Fmnl2	Fmnl2_Intron	0.00021318	0.717236	4.48943	7.14942e-05	0.0300676	-4.25281
cg42621036_TC21	cg42621036	Ssh1	Ssh1_Intron	0.000345759	0.870885	4.48942	7.1495e-05	0.0300676	-4.25282
cg28517494_TC21	cg28517494	Psap	Psap_Intron	-0.000197652	0.116423	-4.48942	7.14952e-05	0.0300676	-4.25282
cg38196399_TC21	cg38196399	Barhl1	Barhl1_Promoter	-0.00018194	0.088075	-4.48771	7.18638e-05	0.0301797	-4.25789
cg29618485_BC21	cg29618485	Shmt1	Shmt1_Promoter	0.000237833	0.756082	4.48594	7.22458e-05	0.0302972	-4.26311
cg13382372_TC21	cg13382372	Hoxc4	Hoxc4_Intergenic_downstream	-0.000149953	0.0959792	-4.48515	7.24154e-05	0.0303253	-4.26542
cg34149601_BC21	cg34149601	Arhgap31	Arhgap31_Intron	0.000299324	0.838651	4.48411	7.26421e-05	0.0303642	-4.2685
cg39287302_TC11	cg39287302	Ptgis	Ptgis_Intergenic_upstream	0.000238891	0.723754	4.48282	7.29238e-05	0.0303642	-4.27231
cg41678810_TC21	cg41678810	2510039O18Rik	2510039O18Rik_Promoter	-0.000259967	0.214074	-4.48152	7.32078e-05	0.0303642	-4.27614
cg31921311_BC21	cg31921311	Ap3b1	Ap3b1_Exon	0.000210808	0.722502	4.48134	7.32479e-05	0.0303642	-4.27668
cg31777116_BC21	cg31777116	Mir466f-4	Mir466f-4_Intergenic_downstream	0.000279846	0.549224	4.48066	7.3396e-05	0.0303642	-4.27867
cg36017634_TC11	cg36017634	Zfp516	Zfp516_Intron	0.00019035	0.83775	4.48059	7.3411e-05	0.0303642	-4.27887
cg39191378_TC21	cg39191378	Ppp1r16b	Ppp1r16b_Intron	-0.000201149	0.0625975	-4.48042	7.34499e-05	0.0303642	-4.27939
cg38354047_TC11	cg38354047	Acvr2a	Acvr2a_Intergenic_upstream	0.000198229	0.927684	4.48016	7.35057e-05	0.0303642	-4.28014
cg43278815_BC21	cg43278815	Plxna4	Plxna4_Intron	0.000268697	0.727057	4.47997	7.35483e-05	0.0303642	-4.28071
cg46578996_TC21	cg46578996	Ets1	Ets1_Intergenic_upstream	0.000253139	0.814482	4.47963	7.36229e-05	0.0303642	-4.28171
cg37711543_BC21	cg37711543	Gm26685	Gm26685_Intron	0.000256137	0.817878	4.47957	7.36363e-05	0.0303642	-4.28189
cg34099789_TC21	cg34099789	Slc12a8	Slc12a8_Intron	0.000208746	0.651918	4.47558	7.45228e-05	0.030667	-4.29367
cg43539660_TC21	cg43539660	Rpia	Rpia_Exon	0.000253795	0.759491	4.47494	7.46642e-05	0.030667	-4.29554
cg42078089_TC21	cg42078089	Rab28	Rab28_Intergenic_downstream	0.000450626	0.809399	4.47487	7.46812e-05	0.030667	-4.29576
cg30122886_TC11	cg30122886	Pitpnc1	Pitpnc1_Intron	0.000232393	0.903092	4.47428	7.48115e-05	0.0306779	-4.29748
cg42317251_BC21	cg42317251	Tmem165	Tmem165_Promoter	0.000551988	0.788651	4.47207	7.5308e-05	0.0308388	-4.30399
cg45646655_TC11	cg45646655	Sorbs2	Sorbs2_Intron	0.000279873	0.440374	4.4707	7.56188e-05	0.0309233	-4.30805
cg33485635_BC21	cg33485635	Adgrb1	Adgrb1_Intergenic_upstream	0.000243853	0.549892	4.46987	7.58071e-05	0.030945	-4.3105
cg36149873_TC21	cg36149873	Pga5	Pga5_fiveUTR	0.000248649	0.629118	4.46937	7.59195e-05	0.030945	-4.31196
cg31649911_TC21	cg31649911	Gm10782	Gm10782_Intergenic_upstream	0.000249038	0.704975	4.46908	7.59853e-05	0.030945	-4.31281
cg43396324_BC21	cg43396324	Tra2a	Tra2a_Intron	0.000341807	0.796374	4.4669	7.64841e-05	0.0310706	-4.31925
cg39304067_BC21	cg39304067	Kcng1	Kcng1_Intergenic_upstream	0.000242159	0.663648	4.46681	7.65037e-05	0.0310706	-4.31951
cg37185283_TC21	cg37185283	Ecel1	Ecel1_Exon	0.000180542	0.512585	4.46593	7.67062e-05	0.0311102	-4.32211
cg45135301_BC21	cg45135301	Zfp629	Zfp629_Promoter	-0.000154326	0.0905463	-4.46246	7.75075e-05	0.0313098	-4.33234
cg39862529_TC21	cg39862529	Il12a	Il12a_Intron	-0.000217045	0.0805132	-4.46185	7.76489e-05	0.0313098	-4.33414
cg44040420_TC21	cg44040420	Lrp6	Lrp6_Promoter	8.71341e-05	0.0516938	4.46112	7.78181e-05	0.0313098	-4.33628
cg39826157_BC21	cg39826157	Mme	Mme_fiveUTR	-0.000198682	0.158215	-4.46105	7.78345e-05	0.0313098	-4.33649
cg46996674_BC21	cg46996674	Eef1a1	Eef1a1_Intergenic_upstream	0.000281222	0.750011	4.46051	7.79592e-05	0.0313098	-4.33806
cg35306296_BC21	cg35306296	Six3	Six3_Intergenic_upstream	0.000244838	0.5019	4.46019	7.80351e-05	0.0313098	-4.33902
cg30040765_BC21	cg30040765	Stat5b	Stat5b_Intron	-0.000167088	0.0497392	-4.46018	7.80369e-05	0.0313098	-4.33904
cg37897643_BC21	cg37897643	Marc1	Marc1_Intron	0.000416134	0.734703	4.46015	7.80446e-05	0.0313098	-4.33914
cg30293071_TC11	cg30293071	Alyref	Alyref_Intron	0.000281726	0.636081	4.45729	7.87146e-05	0.0315171	-4.34756
cg40796097_BO21	cg40796097	Ccl27a	Ccl27a_Intron	0.000287436	0.712666	4.45704	7.87742e-05	0.0315171	-4.3483
cg33639737_TC21	cg33639737	Tbc1d22a	Tbc1d22a_Intergenic_upstream	0.000371167	0.831699	4.45448	7.93783e-05	0.0317119	-4.35582
cg34829339_BC21	cg34829339	Rsph1	Rsph1_Promoter	0.000309896	0.82022	4.45408	7.94751e-05	0.0317119	-4.35702
cg35279403_BC21	cg35279403	Eml4	Eml4_Intron	-0.000154719	0.058389	-4.45308	7.97128e-05	0.0317538	-4.35996
cg48222815_TC21	cg48222815	Gm3376	Gm3376_Intergenic_downstream	0.000471734	0.816123	4.45274	7.97948e-05	0.0317538	-4.36097
cg28475530_TC21	cg28475530	Man1a	Man1a_Intron	0.000101475	0.0342924	4.45094	8.02255e-05	0.0318649	-4.36627
cg40910506_TC21	cg40910506	Rad23b	Rad23b_Promoter	-0.000395236	0.165583	-4.45067	8.02891e-05	0.0318649	-4.36705
cg43087395_TC21	cg43087395	Vps50	Vps50_Intron	0.000208292	0.883676	4.44971	8.0519e-05	0.0319113	-4.36987
cg40797736_TC11	cg40797736	Gm20878	Gm20878_Exon	0.000195682	0.743915	4.44927	8.06266e-05	0.0319113	-4.37118
cg43317463_TC21	cg43317463	Dgki	Dgki_Promoter	-0.000154952	0.108842	-4.44884	8.07295e-05	0.0319113	-4.37244
cg47046526_BC11	cg47046526	Ube2cbp	Ube2cbp_Intergenic_downstream	0.000292129	0.758348	4.44546	8.15494e-05	0.0321924	-4.38238
cg41200180_TC11	cg41200180	Dnajc6	Dnajc6_Intron	-0.000127122	0.0724341	-4.44204	8.23872e-05	0.0324076	-4.39244
cg32750867_BC11	cg32750867	Gm32455	Gm32455_Intergenic_downstream	0.000473965	0.656644	4.44178	8.24516e-05	0.0324076	-4.39321
cg41545695_BC21	cg41545695	Cnr2	Cnr2_Intron	-0.000334755	0.102165	-4.44138	8.25498e-05	0.0324076	-4.39438
cg36491705_BC11	cg36491705	Sorcs3	Sorcs3_Intergenic_downstream	0.000306339	0.803282	4.44055	8.27548e-05	0.0324076	-4.39683
cg35020943_TC21	cg35020943	Tbc1d5	Tbc1d5_Intergenic_upstream	0.000373077	0.860507	4.43963	8.29839e-05	0.0324076	-4.39955
cg31019709_TC21	cg31019709	Ttc7b	Ttc7b_Promoter	0.000334463	0.835545	4.43929	8.30679e-05	0.0324076	-4.40054
cg46309289_TC11	cg46309289	Galnt2	Galnt2_Intron	0.000315824	0.702224	4.43925	8.30781e-05	0.0324076	-4.40066
cg37499637_BC21	cg37499637	Lgr6	Lgr6_Intron	0.000219637	0.802436	4.43889	8.31673e-05	0.0324076	-4.40172
cg36805186_BC21	cg36805186	Kansl3	Kansl3_Promoter	0.000211211	0.739754	4.43839	8.3293e-05	0.0324076	-4.40321
cg40054843_TC21	cg40054843	Mir7014	Mir7014_Promoter	0.000260386	0.780876	4.43828	8.332e-05	0.0324076	-4.40353
cg47659723_BC11	cg47659723	Adgrg4	Adgrg4_Exon	0.000238781	0.73084	4.43819	8.33425e-05	0.0324076	-4.40379
cg32353618_BC21	cg32353618	Wdfy4	Wdfy4_Intron	0.000308727	0.849341	4.43793	8.34078e-05	0.0324076	-4.40456
cg38232021_BC21	cg38232021	Fubp3	Fubp3_Intron	0.000248703	0.872923	4.4368	8.36886e-05	0.0324352	-4.40787
cg40999494_TC21	cg40999494	Gm12911	Gm12911_Intergenic_downstream	0.000294686	0.458803	4.43676	8.36982e-05	0.0324352	-4.40798
cg29209899_BC21	cg29209899	Camk2b	Camk2b_Intron	0.000247415	0.444882	4.43559	8.39926e-05	0.0325068	-4.41144
cg28367846_BC21	cg28367846	Fyn	Fyn_Intron	0.00030634	0.772022	4.43434	8.43066e-05	0.0325857	-4.41511
cg32281140_BC21	cg32281140	4930572O13Rik	4930572O13Rik_Intergenic_upstream	0.000224143	0.706594	4.43355	8.45045e-05	0.0326196	-4.41742
cg37708124_BC21	cg37708124	F5	F5_Exon	0.0003084	0.838372	4.4331	8.46188e-05	0.0326212	-4.41875
cg29905650_BC21	cg29905650	Msi2	Msi2_Intron	0.000338425	0.853619	4.43087	8.51841e-05	0.0327342	-4.4253
cg28734293_TC11	cg28734293	Zbtb7a	Zbtb7a_Intron	0.000500663	0.781001	4.43045	8.5293e-05	0.0327342	-4.42656
cg40796099_BC21	cg40796099	Ccl27a	Ccl27a_Intron	0.000231809	0.89204	4.42949	8.55361e-05	0.0327342	-4.42936
cg40065823_BC21	cg40065823	Gm15441	Gm15441_Intergenic_downstream	-0.000347733	0.645834	-4.42936	8.55694e-05	0.0327342	-4.42974
cg38772826_TC21	cg38772826	Pax6	Pax6_Intron	-0.000163238	0.198897	-4.42887	8.56948e-05	0.0327342	-4.43118
cg31945920_TC21	cg31945920	Fam169a	Fam169a_Exon	0.000227537	0.557509	4.4285	8.57906e-05	0.0327342	-4.43228
cg34705490_BC11	cg34705490	Ppp2r1a	Ppp2r1a_Exon	0.000337398	0.718964	4.4285	8.57917e-05	0.0327342	-4.43229
cg41803839_TC21	cg41803839	Samd11	Samd11_Promoter	-0.000161318	0.102511	-4.42848	8.57963e-05	0.0327342	-4.43235
cg29923317_TC21	cg29923317	Mmd	Mmd_Intron	0.000254246	0.878176	4.42652	8.63002e-05	0.032884	-4.43811
cg33522677_TC21	cg33522677	Rbfox2	Rbfox2_Intron	0.000243055	0.751473	4.42562	8.65318e-05	0.0329299	-4.44075
cg42254477_TC21	cg42254477	Grxcr1	Grxcr1_Intergenic_downstream	0.0002912	0.799969	4.42402	8.69453e-05	0.0330448	-4.44544
cg45178315_BC11	cg45178315	Fgfr2	Fgfr2_Intron	0.000157808	0.939256	4.42278	8.72682e-05	0.0331228	-4.44908
cg46092554_BC21	cg46092554	Ces2h	Ces2h_Exon	0.000216391	0.823093	4.42223	8.74135e-05	0.0331228	-4.45072
cg34797139_TC21	cg34797139	Pnpla1	Pnpla1_fiveUTR	0.000337069	0.648159	4.42185	8.75107e-05	0.0331228	-4.45181
cg36214328_TC11	cg36214328	1500015L24Rik	1500015L24Rik_Intron	0.000376544	0.847443	4.42152	8.7598e-05	0.0331228	-4.45279
cg41784802_BC21	cg41784802	Plch2	Plch2_Intron	0.000188148	0.320426	4.4208	8.77856e-05	0.0331514	-4.4549
cg47971560_TC21	cg47971560	Nap1l3	Nap1l3_Intergenic_downstream	0.000387192	0.818245	4.41994	8.80134e-05	0.0331951	-4.45745
cg44191093_BC21	cg44191093	Eps8l1	Eps8l1_threeUTR	-0.000398385	0.479893	-4.41847	8.83991e-05	0.0332938	-4.46175
cg47563150_BC21	cg47563150	Btg1c	Btg1c_Intergenic_upstream	0.000403995	0.777272	4.41753	8.86475e-05	0.0332938	-4.46451
cg34824162_TC11	cg34824162	Btbd9	Btbd9_Intron	0.000109149	0.972132	4.4169	8.88141e-05	0.0332938	-4.46636
cg36147776_BC21	cg36147776	Ppp1r32	Ppp1r32_Promoter	0.000168945	0.628519	4.41678	8.88482e-05	0.0332938	-4.46674
cg47662563_BC11	cg47662563	Arhgef6	Arhgef6_Intron	-0.00030528	0.172885	-4.41676	8.88514e-05	0.0332938	-4.46677
cg46486776_BC21	cg46486776	Icam5	Icam5_Exon	-0.000261978	0.13855	-4.41639	8.895e-05	0.0332938	-4.46786
cg42040994_TC21	cg42040994	Sorcs2	Sorcs2_Intron	0.000249044	0.837888	4.41519	8.92711e-05	0.0333426	-4.47141
cg45213849_BC21	cg45213849	Clrn3	Clrn3_Intergenic_downstream	0.000188355	0.474423	4.41506	8.93054e-05	0.0333426	-4.47179
cg46646295_TC21	cg46646295	4930546K05Rik	4930546K05Rik_Promoter	0.000270607	0.848729	4.4137	8.9668e-05	0.0334078	-4.47577
cg44550824_TC21	cg44550824	Mrgprx2	Mrgprx2_Intron	-0.000242909	0.426725	-4.41336	8.97588e-05	0.0334078	-4.47677
cg33106500_BC11	cg33106500	Cdh9	Cdh9_Intergenic_upstream	0.000231848	0.93514	4.41309	8.98316e-05	0.0334078	-4.47756
cg37269483_TC21	cg37269483	4930533P14Rik	4930533P14Rik_Intergenic_upstream	0.000275626	0.814198	4.41272	8.99316e-05	0.0334078	-4.47866
cg37528904_TC11	cg37528904	Mir181a-1	Mir181a-1_Intergenic_upstream	0.000247386	0.922434	4.41155	9.02451e-05	0.0334823	-4.48208
cg31396890_TC21	cg31396890	4930519D14Rik	4930519D14Rik_Intergenic_upstream	0.000239074	0.731655	4.41109	9.03705e-05	0.0334869	-4.48345
cg43990953_BC21	cg43990953	Gm38404	Gm38404_Intergenic_downstream	-9.62487e-05	0.0405252	-4.40932	9.0849e-05	0.0336221	-4.48864
cg34446955_BC11	cg34446955	Map3k7cl	Map3k7cl_Intergenic_downstream	0.000293848	0.577151	4.4077	9.12888e-05	0.0336838	-4.49339
cg34662648_BC11	cg34662648	Afdn	Afdn_Intron	0.000184961	0.796056	4.40734	9.13872e-05	0.0336838	-4.49445
cg33386515_BC11	cg33386515	Mtss1	Mtss1_Promoter	-0.000210942	0.0806179	-4.40649	9.16187e-05	0.0336838	-4.49694
cg46470116_TC21	cg46470116	Zfp558	Zfp558_Intron	0.0003166	0.586497	4.40645	9.1629e-05	0.0336838	-4.49705
cg29848509_TC11	cg29848509	Slfn1	Slfn1_Exon	0.000254841	0.922976	4.4064	9.16419e-05	0.0336838	-4.49719
cg44105415_TC21	cg44105415	Pde3a	Pde3a_Intron	0.000239519	0.866147	4.4062	9.16985e-05	0.0336838	-4.4978
cg39183826_TC11	cg39183826	Rprd1b	Rprd1b_Intron	0.000335322	0.773869	4.40482	9.20755e-05	0.0337359	-4.50183
cg45099560_BC21	cg45099560	Hs3st4	Hs3st4_Intron	0.000241672	0.866983	4.40465	9.21244e-05	0.0337359	-4.50236
cg40882760_TC21	cg40882760	Cylc2	Cylc2_Intergenic_downstream	0.000393158	0.441116	4.40439	9.2195e-05	0.0337359	-4.50311
cg38914536_BC21	cg38914536	Fbn1	Fbn1_fiveUTR	-9.81653e-05	0.0992068	-4.40402	9.2296e-05	0.0337359	-4.50419
cg41625503_BC21	cg41625503	Arhgef19	Arhgef19_Intergenic_downstream	0.000343178	0.639531	4.40295	9.25924e-05	0.0337633	-4.50734
cg42060444_TC21	cg42060444	Nsg1	Nsg1_Promoter	0.000255445	0.649468	4.40259	9.26917e-05	0.0337633	-4.50839
cg46279681_BC21	cg46279681	Galnt2	Galnt2_Intron	0.00031623	0.531263	4.40251	9.27131e-05	0.0337633	-4.50862
cg40343839_BC11	cg40343839	Papss1	Papss1_Intron	0.000421829	0.848382	4.40146	9.30033e-05	0.0338274	-4.51169
cg30548944_TC21	cg30548944	Agr2	Agr2_Intergenic_downstream	0.000227527	0.888049	4.39931	9.36025e-05	0.0339919	-4.51801
cg41299447_TC21	cg41299447	Trabd2b	Trabd2b_Intron	0.000171986	0.71703	4.39877	9.37523e-05	0.0339919	-4.51958
cg38169298_BC21	cg38169298	Notch1	Notch1_Intergenic_upstream	0.000174722	0.7963	4.39829	9.38881e-05	0.0339919	-4.52101
cg28893307_TC21	cg28893307	Kera	Kera_Promoter	0.000285032	0.884819	4.39819	9.39147e-05	0.0339919	-4.52129
cg43888426_TC21	cg43888426	Rassf4	Rassf4_Promoter	0.000218675	0.660393	4.39672	9.43296e-05	0.0340359	-4.52562
cg47066282_TC11	cg47066282	Mthfsl	Mthfsl_Promoter	0.000198217	0.924007	4.39671	9.43317e-05	0.0340359	-4.52564
cg35636581_BC21	cg35636581	Nr3c1	Nr3c1_Intergenic_upstream	0.000362587	0.80919	4.39653	9.43812e-05	0.0340359	-4.52616
cg39813603_TC21	cg39813603	Mbnl1	Mbnl1_Intergenic_downstream	-0.000174517	0.0498643	-4.39423	9.50326e-05	0.034198	-4.53292
cg34010134_BO21	cg34010134	Kng2	Kng2_fiveUTR	0.000354943	0.714085	4.39406	9.5081e-05	0.034198	-4.53342
cg31719632_TC21	cg31719632	Fancc	Fancc_fiveUTR	-0.000232416	0.202002	-4.39328	9.53026e-05	0.034198	-4.53571
cg39985069_TC21	cg39985069	Pear1	Pear1_Intron	0.000302412	0.447265	4.39286	9.54204e-05	0.034198	-4.53693
cg45195807_TC21	cg45195807	Tex36	Tex36_Intergenic_downstream	0.000304782	0.767434	4.39261	9.54921e-05	0.034198	-4.53767
cg35982740_TC21	cg35982740	LOC105246506	LOC105246506_Promoter	0.000253305	0.82208	4.3925	9.5524e-05	0.034198	-4.53799
cg33935592_TC11	cg33935592	Myh11	Myh11_Intron	0.000174459	0.946833	4.39108	9.59299e-05	0.0342324	-4.54216
cg36937695_TC21	cg36937695	Pgap1	Pgap1_Intron	0.000232949	0.510657	4.39105	9.59364e-05	0.0342324	-4.54223
cg35571015_TC21	cg35571015	Nrep	Nrep_Intron	0.000228074	0.786842	4.39095	9.59669e-05	0.0342324	-4.54254
cg40365371_TC21	cg40365371	Tacr3	Tacr3_Intergenic_downstream	0.000225972	0.884418	4.38806	9.67964e-05	0.0344664	-4.55101
cg33180757_BC21	cg33180757	Trio	Trio_Intron	0.000254501	0.74827	4.38786	9.68557e-05	0.0344664	-4.55161
cg45684844_TC21	cg45684844	Tenm3	Tenm3_Intron	0.000250943	0.732616	4.38613	9.73559e-05	0.0345717	-4.55667
cg37126460_TC21	cg37126460	Acsl3	Acsl3_Intergenic_downstream	0.000230292	0.692498	4.38603	9.7385e-05	0.0345717	-4.55697
cg35287173_TC11	cg35287173	8430430B14Rik	8430430B14Rik_Intergenic_upstream	-0.000303003	0.0991101	-4.38538	9.75739e-05	0.0345972	-4.55887
cg38278185_TC11	cg38278185	Stom	Stom_threeUTR	0.000353289	0.839529	4.38398	9.79808e-05	0.0347	-4.56296
cg39477392_TC11	cg39477392	Zfp704	Zfp704_Intron	0.000302295	0.923174	4.38188	9.85961e-05	0.0348762	-4.56912
cg44920873_BC11	cg44920873	P2ry6	P2ry6_fiveUTR	0.000269349	0.481653	4.38028	9.90693e-05	0.0349717	-4.57382
cg29820131_BC21	cg29820131	Adap2	Adap2_Intron	0.000372988	0.813923	4.38016	9.91024e-05	0.0349717	-4.57415
cg45457599_BC21	cg45457599	Nek5	Nek5_Intron	0.000329638	0.76357	4.37948	9.93051e-05	0.0350015	-4.57616
cg32638295_TC21	cg32638295	Nkx3-1	Nkx3-1_Promoter	0.00028561	0.525403	4.37836	9.96366e-05	0.0350677	-4.57944
cg39311418_TC21	cg39311418	Sall4	Sall4_Promoter	0.000268247	0.840557	4.37805	9.97298e-05	0.0350677	-4.58036
cg46487545_BC21	cg46487545	Raver1	Raver1_Promoter	0.000389249	0.8555	4.37636	0.000100233	0.0352028	-4.5853
cg30018301_BC21	cg30018301	Rara	Rara_Promoter	-0.000277844	0.317189	-4.37552	0.000100485	0.0352191	-4.58777
cg30537809_BC21	cg30537809	Hdac9	Hdac9_Exon	0.00029348	0.86642	4.37541	0.000100517	0.0352191	-4.58809
cg46095095_TC21	cg46095095	Tradd	Tradd_Intron	-0.000207179	0.0807981	-4.37496	0.000100652	0.0352248	-4.58941
cg34684381_TC21	cg34684381	Zfp960	Zfp960_Intergenic_upstream	0.000556041	0.714331	4.37442	0.000100814	0.0352395	-4.59098
cg43979759_TC21	cg43979759	Ntf3	Ntf3_Intron	-0.000149603	0.0678857	-4.37316	0.000101192	0.0353161	-4.59466
cg33392926_TC21	cg33392926	Trib1	Trib1_Intergenic_downstream	-0.000198326	0.145099	-4.3729	0.000101271	0.0353161	-4.59544
cg42736518_BC11	cg42736518	Cux2	Cux2_Intron	0.000203029	0.784357	4.37179	0.000101605	0.0353909	-4.59867
cg42189591_BC21	cg42189591	4933402J10Rik	4933402J10Rik_Intergenic_upstream	0.00041078	0.833089	4.37058	0.000101972	0.035477	-4.60222
cg34965757_TC21	cg34965757	Ttbk1	Ttbk1_Intron	-0.000113563	0.0343968	-4.36983	0.000102201	0.0355148	-4.60442
cg42937358_TC21	cg42937358	Adap1	Adap1_Promoter	0.000280395	0.25998	4.36611	0.000103341	0.0358687	-4.61532
cg33976848_TC11	cg33976848	Olfr171	Olfr171_Promoter	0.000321425	0.901651	4.36361	0.000104111	0.0359909	-4.62262
cg29963927_BC21	cg29963927	Tac4	Tac4_Promoter	0.000239684	0.798726	4.36321	0.000104236	0.0359909	-4.6238
cg48016393_BC21	cg48016393	Sytl4	Sytl4_Intron	0.000308509	0.879536	4.36317	0.000104249	0.0359909	-4.62392
cg37897697_BC21	cg37897697	Marc1	Marc1_Exon	-0.000246844	0.35073	-4.36316	0.000104252	0.0359909	-4.62395
cg46295019_TC21	cg46295019	Galnt2	Galnt2_Intron	0.000166923	0.520465	4.36301	0.0001043	0.0359909	-4.6244
cg42011768_TC21	cg42011768	Nkx1-1	Nkx1-1_Intergenic_upstream	-0.000278668	0.287146	-4.3622	0.000104551	0.0360355	-4.62677
cg33531631_TC21	cg33531631	Cacng2	Cacng2_Exon	0.000349849	0.724953	4.36079	0.00010499	0.0361446	-4.63088
cg46627548_TC11	cg46627548	Gramd1b	Gramd1b_Intron	0.000327679	0.899136	4.35978	0.000105306	0.0361668	-4.63383
cg43856366_TC21	cg43856366	Il17rc	Il17rc_Exon	0.000224554	0.718299	4.35892	0.000105576	0.0361668	-4.63635
cg44555428_TC21	cg44555428	Nav2	Nav2_Intron	0.000184798	0.731645	4.35853	0.000105699	0.0361668	-4.63749
cg33200601_TC21	cg33200601	4930430F21Rik	4930430F21Rik_Promoter	0.000245262	0.73732	4.35813	0.000105827	0.0361668	-4.63868
cg35757323_BC21	cg35757323	Lmnb1	Lmnb1_Intergenic_upstream	0.000324149	0.765971	4.35801	0.000105864	0.0361668	-4.63903
cg30728393_BC21	cg30728393	Wdr20rt	Wdr20rt_Intergenic_downstream	0.000225816	0.811037	4.35761	0.000105991	0.0361668	-4.6402
cg39368506_TC21	cg39368506	Pck1	Pck1_Exon	0.000283307	0.729162	4.35711	0.000106147	0.0361668	-4.64165
cg46685161_BC21	cg46685161	Fxyd6	Fxyd6_Promoter	-0.000148223	0.061914	-4.35704	0.000106171	0.0361668	-4.64187
cg46204756_BC21	cg46204756	Wwox	Wwox_Intron	-0.000101308	0.025324	-4.3566	0.000106308	0.0361668	-4.64314
cg33414424_BC21	cg33414424	Gm20740	Gm20740_Intron	0.000153229	0.9359	4.35644	0.00010636	0.0361668	-4.64362
cg37691812_BC11	cg37691812	Dnm3	Dnm3_Intron	0.000254692	0.8642	4.35616	0.000106447	0.0361668	-4.64442
cg40040775_BC21	cg40040775	Tdrkh	Tdrkh_Exon	0.000464721	0.820633	4.35593	0.00010652	0.0361668	-4.6451
cg39260255_TC21	cg39260255	Zfp334	Zfp334_fiveUTR	-0.000166693	0.103439	-4.35513	0.000106777	0.0361755	-4.64746
cg29154755_BC21	cg29154755	Hsd17b6	Hsd17b6_Intergenic_downstream	0.000273985	0.890288	4.35467	0.00010692	0.0361755	-4.64878
cg41616971_BC11	cg41616971	Padi4	Padi4_Intron	-0.000260692	0.238833	-4.35402	0.000107127	0.0361755	-4.65068
cg37098007_BC21	cg37098007	Gm15179	Gm15179_Intron	0.000200423	0.786206	4.35389	0.00010717	0.0361755	-4.65108
cg40754054_TC21	cg40754054	Mob3b	Mob3b_Intron	0.000162079	0.929851	4.35314	0.000107408	0.0361755	-4.65326
cg41742421_TC21	cg41742421	Espn	Espn_Exon	-8.45709e-05	0.0303745	-4.35262	0.000107575	0.0361755	-4.65478
cg35095685_BC11	cg35095685	Efna5	Efna5_Intron	0.000242363	0.905077	4.35217	0.000107721	0.0361755	-4.65611
cg44143724_TC11	cg44143724	Gm15706	Gm15706_Intron	-0.000331599	0.111103	-4.35124	0.000108017	0.0361755	-4.65882
cg33415641_BC21	cg33415641	Gm20740	Gm20740_Intron	0.000272764	0.880232	4.35091	0.000108125	0.0361755	-4.65979
cg28684815_BC21	cg28684815	Itgb2	Itgb2_threeUTR	0.000371147	0.806372	4.35082	0.000108154	0.0361755	-4.66006
cg47088608_BC11	cg47088608	Plscr2	Plscr2_Promoter	0.000166148	0.933158	4.35038	0.000108295	0.0361755	-4.66134
cg34782750_TC11	cg34782750	Anks1	Anks1_Intron	0.000299522	0.730644	4.35036	0.000108301	0.0361755	-4.66139
cg43347191_TC21	cg43347191	Ssbp1	Ssbp1_Exon	0.00038475	0.88306	4.35009	0.000108389	0.0361755	-4.66219
cg39126328_TC11	cg39126328	Hck	Hck_Intergenic_upstream	0.000333203	0.782431	4.34969	0.000108517	0.0361755	-4.66335
cg29767003_BC21	cg29767003	Rilp	Rilp_Exon	-0.00024989	0.0987927	-4.34956	0.000108558	0.0361755	-4.66372
cg42096427_TC21	cg42096427	Prom1	Prom1_Intron	0.000221309	0.920549	4.34935	0.000108627	0.0361755	-4.66434
cg44881725_BC11	cg44881725	Gab2	Gab2_Intron	0.000357981	0.766668	4.34902	0.000108735	0.0361755	-4.66532
cg33353679_TC11	cg33353679	Deptor	Deptor_Intron	-0.000217077	0.118628	-4.34899	0.000108745	0.0361755	-4.66541
cg31896922_BC21	cg31896922	Rasgrf2	Rasgrf2_Intron	0.000238897	0.854084	4.3478	0.000109129	0.0362623	-4.66887
cg28249751_BC21	cg28249751	Ahi1	Ahi1_Intergenic_downstream	0.000507987	0.832338	4.34733	0.000109283	0.0362729	-4.67026
cg29191153_TC21	cg29191153	Hormad2	Hormad2_Intron	-0.000287525	0.252599	-4.34582	0.000109774	0.0363651	-4.67467
cg36445869_BC11	cg36445869	Btrc	Btrc_Intron	0.000333326	0.835959	4.34572	0.000109806	0.0363651	-4.67495
cg36568670_TC21	cg36568670	6720468P15Rik	6720468P15Rik_Promoter	0.000343091	0.63474	4.34472	0.000110134	0.0364329	-4.67788
cg37982276_TC21	cg37982276	Syt14	Syt14_Intron	0.000240003	0.677646	4.34378	0.000110443	0.0364613	-4.68063
cg36080480_BC21	cg36080480	Pcx	Pcx_Exon	0.000199562	0.484211	4.34371	0.000110466	0.0364613	-4.68084
cg32501509_TC21	cg32501509	Slc7a8	Slc7a8_Intron	0.000203192	0.932754	4.34148	0.000111202	0.0366632	-4.68736
cg41716985_BC11	cg41716985	Rere	Rere_Intron	-0.000140938	0.901274	-4.34016	0.000111639	0.03676	-4.69121
cg34874570_BC21	cg34874570	Ly6g6c	Ly6g6c_Exon	0.000271751	0.809894	4.33947	0.000111869	0.03676	-4.69324
cg35643151_TC21	cg35643151	Kctd16	Kctd16_Intron	0.000310221	0.564006	4.33935	0.000111908	0.03676	-4.69358
cg34022141_BC11	cg34022141	Lpp	Lpp_Promoter	-0.000263154	0.136244	-4.3391	0.000111992	0.03676	-4.69432
cg37892684_TC21	cg37892684	1700112H15Rik	1700112H15Rik_Intergenic_downstream	0.00027921	0.637305	4.33858	0.000112164	0.0367757	-4.69583
cg34933164_BC21	cg34933164	Slc25a27	Slc25a27_Intron	0.000215141	0.690285	4.33736	0.000112573	0.0368597	-4.6994
cg43269517_BC21	cg43269517	2210408F21Rik	2210408F21Rik_Promoter	-0.000152057	0.102282	-4.33707	0.000112669	0.0368597	-4.70024
cg28242345_TC11	cg28242345	Mir6413	Mir6413_Promoter	0.000249931	0.914453	4.33665	0.000112809	0.0368648	-4.70146
cg37815706_TC21	cg37815706	Cep170	Cep170_Intron	-0.00024863	0.0783641	-4.33256	0.000114191	0.0372751	-4.71342
cg37460045_BC21	cg37460045	Rab7b	Rab7b_Promoter	0.000336123	0.692723	4.33126	0.000114632	0.0373447	-4.71721
cg45912346_BC11	cg45912346	Tecr	Tecr_Exon	0.00022731	0.826829	4.33117	0.000114666	0.0373447	-4.71749
cg39916967_TC11	cg39916967	Rapgef2	Rapgef2_Exon	-0.0002806	0.0736664	-4.33082	0.000114783	0.0373447	-4.71849
cg35647267_TC21	cg35647267	Prelid2	Prelid2_Intergenic_downstream	0.000429599	0.833441	4.32883	0.000115465	0.0375256	-4.72432
cg34642357_BC11	cg34642357	Prkn	Prkn_Intron	0.000278745	0.80789	4.32839	0.000115616	0.0375334	-4.7256
cg39484620_TC21	cg39484620	Pmp2	Pmp2_Intron	0.000213549	0.837505	4.32691	0.000116125	0.0376191	-4.72992
cg33162872_TC21	cg33162872	Retreg1	Retreg1_fiveUTR	0.000326508	0.708604	4.32688	0.000116134	0.0376191	-4.72999
cg38857538_TC21	cg38857538	Phgr1	Phgr1_Promoter	0.000332312	0.662474	4.32594	0.000116459	0.0376831	-4.73274
cg30591638_BC21	cg30591638	Dnajb9	Dnajb9_Intergenic_downstream	0.000224879	0.624107	4.32366	0.000117252	0.0378594	-4.7394
cg35896689_TC21	cg35896689	Dcc	Dcc_Intron	0.000181994	0.583274	4.32364	0.00011726	0.0378594	-4.73946
cg29334625_BC21	cg29334625	Gm10466	Gm10466_Intron	0.000207271	0.870721	4.32185	0.000117886	0.0379206	-4.74469
cg39650566_BC21	cg39650566	Exosc9	Exosc9_Promoter	0.000345183	0.648806	4.32167	0.000117949	0.0379206	-4.74522
cg46600694_TC21	cg46600694	Pate2	Pate2_Intron	0.000242473	0.538249	4.32135	0.000118061	0.0379206	-4.74615
cg41933938_TC21	cg41933938	Atg9b	Atg9b_Exon	-0.000268059	0.12152	-4.32131	0.000118076	0.0379206	-4.74627
cg41522917_TC11	cg41522917	1700021N21Rik	1700021N21Rik_Intergenic_downstream	0.000223918	0.77087	4.32108	0.000118156	0.0379206	-4.74694
cg29761691_TC11	cg29761691	Hic1	Hic1_Exon	-0.00024937	0.451266	-4.3209	0.000118218	0.0379206	-4.74745
cg44766904_BC21	cg44766904	Mesp2	Mesp2_threeUTR	0.000220748	0.861932	4.31967	0.000118652	0.0380187	-4.75106
cg36156269_BC11	cg36156269	Ms4a6c	Ms4a6c_Promoter	0.000385073	0.771651	4.319	0.000118887	0.0380514	-4.753
cg36036956_BC21	cg36036956	Cyb5a	Cyb5a_Intergenic_downstream	0.000236791	0.899583	4.31865	0.000119011	0.0380514	-4.75402
cg31130495_BC21	cg31130495	Ppp2r5c	Ppp2r5c_Promoter	0.00016431	0.273006	4.31752	0.00011941	0.0380838	-4.75731
cg40394409_BC21	cg40394409	Metap1	Metap1_Exon	0.000164899	0.904235	4.31752	0.000119412	0.0380838	-4.75732
cg45268260_TC21	cg45268260	Ifitm6	Ifitm6_Exon	0.000384697	0.786967	4.31728	0.000119498	0.0380838	-4.75803
cg46486779_TC11	cg46486779	Icam5	Icam5_Exon	-0.000179757	0.264835	-4.3164	0.000119809	0.0381119	-4.76059
cg39267534_TC21	cg39267534	Zmynd8	Zmynd8_Intron	-0.000234492	0.12293	-4.3163	0.000119844	0.0381119	-4.76087
cg29155180_BC21	cg29155180	Hsd17b6	Hsd17b6_Intron	0.000251379	0.614684	4.31508	0.000120278	0.0381809	-4.76442
cg42928048_BC11	cg42928048	Zfp157	Zfp157_Intergenic_downstream	0.000272199	0.841561	4.3146	0.000120453	0.0381809	-4.76585
cg40797887_BO21	cg40797887	Fam205a2	Fam205a2_Intergenic_upstream	0.000135995	0.548328	4.31438	0.000120532	0.0381809	-4.76649
cg36014059_BC21	cg36014059	4930445N18Rik	4930445N18Rik_Exon	-0.000102035	0.0395818	-4.31425	0.000120577	0.0381809	-4.76685
cg39136120_BC21	cg39136120	Bpifa6	Bpifa6_Promoter	0.000252876	0.582168	4.31034	0.000121984	0.0384705	-4.77825
cg40796096_TC11	cg40796096	Ccl27a	Ccl27a_Intron	0.00052226	0.84214	4.30975	0.000122199	0.0384705	-4.77998
cg46668333_BC11	cg46668333	Usp2	Usp2_Intron	-0.000227733	0.103204	-4.30886	0.000122522	0.0384705	-4.78257
cg34471888_TC11	cg34471888	Scaf4	Scaf4_Intron	0.000357088	0.726147	4.30882	0.000122537	0.0384705	-4.78269
cg44969328_BC11	cg44969328	Olfr516	Olfr516_Promoter	0.000281031	0.787068	4.3085	0.000122655	0.0384705	-4.78364
cg29572398_TC21	cg29572398	Nmur2	Nmur2_Intergenic_upstream	0.000227072	0.427668	4.30831	0.000122723	0.0384705	-4.78418
cg43680985_TC11	cg43680985	4933427D06Rik	4933427D06Rik_Intron	-0.000282287	0.676366	-4.30817	0.000122776	0.0384705	-4.7846
cg38082516_BC21	cg38082516	Stam	Stam_Exon	-0.000137955	0.0442586	-4.30816	0.000122779	0.0384705	-4.78463
cg37070023_BC11	cg37070023	March4	March4_Promoter	-0.000205631	0.0681959	-4.30814	0.000122785	0.0384705	-4.78467
cg42614074_BC21	cg42614074	Wscd2	Wscd2_Exon	-0.000196447	0.16853	-4.30785	0.00012289	0.0384705	-4.78552
cg36133660_TC21	cg36133660	Ints5	Ints5_Exon	0.000139536	0.463883	4.30777	0.00012292	0.0384705	-4.78576
cg33298669_BC11	cg33298669	2310069G16Rik	2310069G16Rik_Intron	0.00023645	0.658318	4.30698	0.00012321	0.0385204	-4.78807
cg39121947_BC11	cg39121947	Id1	Id1_Exon	-0.000170039	0.109723	-4.30635	0.000123441	0.038523	-4.78991
cg29159377_BC21	cg29159377	Il23a	Il23a_Promoter	0.000232459	0.660274	4.30624	0.000123479	0.038523	-4.7902
cg38642403_BC21	cg38642403	Olfr1002	Olfr1002_Promoter	0.000234148	0.812548	4.30512	0.000123893	0.0385688	-4.79349
cg33473400_TC21	cg33473400	Ago2	Ago2_Intron	-0.000403995	0.0940251	-4.30497	0.000123946	0.0385688	-4.79392
cg44763554_TC21	cg44763554	Mir9-3hg	Mir9-3hg_Intergenic_downstream	0.000369717	0.503331	4.30402	0.000124298	0.0385688	-4.7967
cg48212433_BC11	cg48212433	Uba1y	Uba1y_Intergenic_downstream	0.000250615	0.905136	4.30375	0.000124396	0.0385688	-4.79747
cg43739358_TC21	cg43739358	Tafa1	Tafa1_fiveUTR	0.000260123	0.526298	4.30372	0.000124406	0.0385688	-4.79755
cg42904693_TC21	cg42904693	Cux1	Cux1_Intron	0.000273785	0.820474	4.30334	0.000124547	0.0385688	-4.79866
cg38959417_BC21	cg38959417	Nop56	Nop56_Exon	0.000268702	0.844427	4.30303	0.000124661	0.0385688	-4.79956
cg29096258_BC21	cg29096258	Srgap1	Srgap1_Intron	0.000272256	0.743998	4.30302	0.000124668	0.0385688	-4.79961
cg42763198_BC21	cg42763198	Clip1	Clip1_Intron	0.000409668	0.84087	4.30228	0.00012494	0.0386127	-4.80175
cg47977889_TO11	cg47977889	Cldn34c1	Cldn34c1_Intron	0.000268453	0.850258	4.30132	0.000125295	0.038682	-4.80454
cg33854371_TC21	cg33854371	Trap1	Trap1_Intron	0.000249574	0.886177	4.29979	0.000125867	0.0388181	-4.80901
cg36028233_BC21	cg36028233	Tshz1	Tshz1_Intron	0.000344489	0.846367	4.29723	0.000126827	0.039067	-4.81647
cg46604758_TC21	cg46604758	Pate8	Pate8_Promoter	0.000259695	0.669653	4.29678	0.000126998	0.039067	-4.81779
cg43090727_BC21	cg43090727	4930528H21Rik	4930528H21Rik_Exon	0.000232862	0.856758	4.29659	0.00012707	0.039067	-4.81835
cg40796254_TO21	cg40796254	Ccl27a	Ccl27a_Promoter	0.000225554	0.794979	4.2961	0.000127254	0.0390832	-4.81977
cg44072896_BC21	cg44072896	Eps8	Eps8_Intron	0.000295905	0.771945	4.29434	0.00012792	0.0392289	-4.82489
cg37479665_BC11	cg37479665	Golt1a	Golt1a_Intron	0.000275236	0.740821	4.29414	0.000127994	0.0392289	-4.82546
cg38306838_TC21	cg38306838	Wdr38	Wdr38_Intron	0.000345023	0.804249	4.2935	0.000128237	0.0392402	-4.82732
cg31917284_TC21	cg31917284	Scamp1	Scamp1_Promoter	0.000344373	0.570344	4.29315	0.000128373	0.0392402	-4.82836
cg30114751_TC21	cg30114751	Milr1	Milr1_Intron	-0.000204191	0.0687646	-4.29252	0.000128611	0.0392402	-4.83018
cg34685444_BC11	cg34685444	Zfp960	Zfp960_Exon	0.000236633	0.89451	4.29177	0.000128899	0.0392402	-4.83237
cg28854379_BC21	cg28854379	Ntn4	Ntn4_Intron	0.000253031	0.815509	4.29172	0.000128919	0.0392402	-4.83253
cg46353479_BC21	cg46353479	4930567H12Rik	4930567H12Rik_Intron	0.000362187	0.770787	4.29171	0.00012892	0.0392402	-4.83253
cg38173717_BC11	cg38173717	Adamts13	Adamts13_Intron	0.000164929	0.746905	4.2916	0.000128964	0.0392402	-4.83287
cg36091556_BC21	cg36091556	4930481A15Rik	4930481A15Rik_Promoter	0.000451861	0.0946855	4.29096	0.000129208	0.0392402	-4.83473
cg31717800_BC21	cg31717800	Aopep	Aopep_Exon	0.000207224	0.915969	4.29064	0.000129331	0.0392402	-4.83566
cg40279328_TC21	cg40279328	Tram1l1	Tram1l1_Intergenic_upstream	0.000342578	0.603253	4.29015	0.000129519	0.0392402	-4.83708
cg34622422_BC21	cg34622422	6530411M01Rik	6530411M01Rik_Exon	-0.000176308	0.796406	-4.29012	0.000129531	0.0392402	-4.83717
cg34725197_TC11	cg34725197	Sbp	Sbp_fiveUTR	0.000250235	0.830421	4.28986	0.000129633	0.0392402	-4.83795
cg42579248_BC11	cg42579248	Ttc28	Ttc28_Intron	0.000251674	0.818404	4.28937	0.000129821	0.0392402	-4.83937
cg43934005_BC21	cg43934005	Mical3	Mical3_Intron	0.000316412	0.769659	4.2892	0.000129886	0.0392402	-4.83986
cg33637234_BC21	cg33637234	Gramd4	Gramd4_Promoter	0.00026029	0.684762	4.28852	0.000130146	0.0392786	-4.84182
cg28229664_TC21	cg28229664	Tnfaip3	Tnfaip3_Exon	0.000317103	0.680972	4.28632	0.000130999	0.0394957	-4.84823
cg47587103_BC11	cg47587103	Tenm1	Tenm1_Intron	0.000335177	0.824552	4.28515	0.000131455	0.0395929	-4.85164
cg47228481_BC21	cg47228481	Zmynd10	Zmynd10_fiveUTR	-0.000154566	0.182939	-4.28401	0.000131898	0.0396861	-4.85495
cg42685404_TC21	cg42685404	Fbxw8	Fbxw8_Intron	-0.000269477	0.0957503	-4.28312	0.000132249	0.0397513	-4.85756
cg46087367_TC11	cg46087367	Cmtm4	Cmtm4_Intron	0.000251179	0.854885	4.28154	0.000132869	0.0398518	-4.86214
cg40501304_TC21	cg40501304	Gipc2	Gipc2_Exon	0.000242101	0.707845	4.28139	0.000132929	0.0398518	-4.86259
cg38938971_BC21	cg38938971	Bcl2l11	Bcl2l11_Intron	0.000401929	0.733603	4.28105	0.000133064	0.0398518	-4.86358
cg43403825_TC21	cg43403825	Mpp6	Mpp6_Intron	0.000352784	0.613936	4.2809	0.000133122	0.0398518	-4.86401
cg32673684_BC21	cg32673684	Med4	Med4_Intergenic_upstream	0.000237409	0.437748	4.27994	0.000133502	0.0399251	-4.86681
cg30104390_BC21	cg30104390	Cyb561	Cyb561_Exon	0.000259974	0.384698	4.27923	0.000133783	0.0399677	-4.86887
cg29991182_TC11	cg29991182	Tbkbp1	Tbkbp1_Promoter	-0.000151876	0.0448303	-4.2789	0.000133914	0.0399677	-4.86983
cg39364940_BC21	cg39364940	Bmp7	Bmp7_Intron	-0.000260721	0.101648	-4.27832	0.000134146	0.0399964	-4.87153
cg41136336_BC21	cg41136336	Izumo3	Izumo3_Intergenic_upstream	-0.000323772	0.685305	-4.27636	0.000134925	0.0401884	-4.87721
cg35293565_BC11	cg35293565	Plekhh2	Plekhh2_Intron	0.000145713	0.813122	4.27558	0.000135239	0.0402341	-4.87949
cg48122145_TC21	cg48122145	Kctd12b	Kctd12b_Intergenic_downstream	0.000232293	0.895518	4.27498	0.000135477	0.0402341	-4.88122
cg47007234_TC21	cg47007234	Filip1	Filip1_fiveUTR	-0.000164696	0.0841822	-4.27496	0.000135488	0.0402341	-4.8813
cg30483667_BC21	cg30483667	Sox11	Sox11_threeUTR	-0.000143288	0.127877	-4.27462	0.000135622	0.0402341	-4.88227
cg36788572_BC11	cg36788572	Cfc1	Cfc1_Intergenic_upstream	0.000183119	0.845052	4.27395	0.000135894	0.040238	-4.88424
cg44509337_BC21	cg44509337	Akt1s1	Akt1s1_threeUTR	-0.000230137	0.0539664	-4.27367	0.000136006	0.040238	-4.88504
cg42898682_TC21	cg42898682	Dtx2	Dtx2_Intron	0.000149431	0.828629	4.27358	0.000136043	0.040238	-4.88531
cg43604485_BC21	cg43604485	Mir7232	Mir7232_Intergenic_downstream	0.000210665	0.828621	4.27313	0.000136224	0.0402428	-4.88661
cg36161705_TC21	cg36161705	Olfr1434	Olfr1434_Promoter	-0.000188104	0.895101	-4.27265	0.000136417	0.0402428	-4.888
cg46274529_TC11	cg46274529	Galnt2	Galnt2_Intron	-0.00031924	0.130881	-4.27253	0.000136467	0.0402428	-4.88836
cg38185849_TC11	cg38185849	Col5a1	Col5a1_Intron	0.000223026	0.860715	4.27138	0.000136933	0.0402936	-4.89171
cg45451969_TC21	cg45451969	Gm15056	Gm15056_fiveUTR	0.000363614	0.571154	4.27137	0.000136935	0.0402936	-4.89172
cg38572241_TC11	cg38572241	Ttc30a2	Ttc30a2_Intergenic_downstream	0.000260679	0.803042	4.2711	0.000137047	0.0402936	-4.89253
cg29570753_TC21	cg29570753	Nmur2	Nmur2_Intergenic_upstream	0.000262385	0.538445	4.27055	0.000137271	0.0403065	-4.89412
cg29761693_BC21	cg29761693	Hic1	Hic1_Exon	-0.000237346	0.203557	-4.27032	0.000137364	0.0403065	-4.89479
cg28792906_TC21	cg28792906	Hsp90b1	Hsp90b1_Intron	0.000300774	0.743061	4.26987	0.000137545	0.0403198	-4.89608
cg28358154_TC21	cg28358154	4930591E09Rik	4930591E09Rik_Intergenic_upstream	0.000293783	0.825094	4.26912	0.000137852	0.0403342	-4.89827
cg34878312_BC21	cg34878312	H2-D1	H2-D1_Intron	0.000318096	0.830351	4.26908	0.000137867	0.0403342	-4.89837
cg41617864_TC11	cg41617864	Padi3	Padi3_Intron	0.000211524	0.906631	4.26705	0.0001387	0.0405379	-4.90428
cg37611719_BC11	cg37611719	Rgl1	Rgl1_Intron	0.000254382	0.92677	4.26577	0.000139228	0.0406354	-4.90801
cg42424320_TC21	cg42424320	Shroom3	Shroom3_Intron	0.000167762	0.893073	4.26532	0.000139412	0.0406354	-4.9093
cg36328329_TC21	cg36328329	Mir3970	Mir3970_Intergenic_upstream	0.000211214	0.901618	4.26524	0.000139445	0.0406354	-4.90954
cg28494868_TC21	cg28494868	Pkib	Pkib_Intron	0.000283583	0.841737	4.2644	0.000139793	0.0406968	-4.91199
cg43561776_TC11	cg43561776	Tcf7l1	Tcf7l1_Intron	0.000261702	0.89513	4.26393	0.000139986	0.0407129	-4.91334
cg43686553_TC21	cg43686553	Vmn1r40	Vmn1r40_Promoter	0.000453885	0.80617	4.26255	0.000140561	0.0408399	-4.91736
cg35467477_TC11	cg35467477	Cdh2	Cdh2_Intergenic_downstream	0.000425386	0.743883	4.26184	0.000140856	0.0408529	-4.91942
cg42797676_BC21	cg42797676	Tmem132b	Tmem132b_Intergenic_downstream	0.000325197	0.509539	4.26165	0.000140936	0.0408529	-4.91997
cg45051489_BC21	cg45051489	Gde1	Gde1_Intron	0.000417574	0.804859	4.26126	0.000141099	0.0408529	-4.9211
cg45559073_TC21	cg45559073	Rbpms	Rbpms_Intron	0.000324671	0.843157	4.26112	0.000141158	0.0408529	-4.92151
cg29783555_TC11	cg29783555	Tmigd1	Tmigd1_Promoter	0.000406013	0.835366	4.25981	0.000141708	0.0409517	-4.92533
cg38187402_TC11	cg38187402	Olfm1	Olfm1_Promoter	0.000192105	0.618701	4.25922	0.000141955	0.0409517	-4.92704
cg38497150_BC21	cg38497150	4932414N04Rik	4932414N04Rik_Intergenic_downstream	-0.000169866	0.0826774	-4.25892	0.000142081	0.0409517	-4.92791
cg33822630_TC11	cg33822630	Krt90	Krt90_fiveUTR	0.000204119	0.576759	4.25856	0.000142233	0.0409517	-4.92896
cg37452959_TC21	cg37452959	Il20	Il20_Intron	0.000288426	0.787663	4.25827	0.000142353	0.0409517	-4.92978
cg43026030_TC21	cg43026030	Rasl11a	Rasl11a_Intergenic_downstream	0.000289494	0.768622	4.25819	0.000142389	0.0409517	-4.93003
cg28604180_TC21	cg28604180	Rhobtb1	Rhobtb1_Intron	0.000266343	0.780306	4.258	0.000142467	0.0409517	-4.93057
cg40542272_TC21	cg40542272	Negr1	Negr1_Exon	0.000227834	0.670246	4.2558	0.000143401	0.0411462	-4.93698
cg41812061_TC21	cg41812061	Mterf1a	Mterf1a_fiveUTR	0.000332013	0.493836	4.25547	0.00014354	0.0411462	-4.93793
cg48213508_TC21	cg48213508	Eif2s3y	Eif2s3y_Intergenic_upstream	0.000531813	0.754754	4.25536	0.000143588	0.0411462	-4.93825
cg37460652_BC21	cg37460652	Slc26a9	Slc26a9_Intron	0.000189196	0.749783	4.25509	0.0001437	0.0411462	-4.93902
cg38196354_TC21	cg38196354	Barhl1	Barhl1_fiveUTR	-0.000102703	0.0391893	-4.25427	0.000144051	0.0412071	-4.94142
cg47565378_BC21	cg47565378	Atp1b4	Atp1b4_Intron	0.000320047	0.820388	4.25275	0.000144698	0.0413339	-4.94581
cg38372121_BC21	cg38372121	Gm13498	Gm13498_Intergenic_downstream	0.000211236	0.924329	4.25243	0.000144839	0.0413339	-4.94677
cg30995073_BC21	cg30995073	Gpr65	Gpr65_Intergenic_downstream	0.000369953	0.860878	4.25195	0.000145044	0.0413339	-4.94815
cg43876419_BC11	cg43876419	Pparg	Pparg_Promoter	-0.000140789	0.0507149	-4.25193	0.000145053	0.0413339	-4.94821
cg35027028_BC11	cg35027028	Gm19585	Gm19585_Exon	0.000147617	0.941501	4.25145	0.000145258	0.0413392	-4.9496
cg32648481_BC11	cg32648481	Sorbs3	Sorbs3_Intron	-0.000191071	0.222533	-4.2511	0.000145408	0.0413392	-4.95061
cg42717538_BC21	cg42717538	Slc8b1	Slc8b1_Intron	0.00032466	0.826236	4.25091	0.000145491	0.0413392	-4.95117
cg47716878_TC11	cg47716878	Aff2	Aff2_Intron	0.000611322	0.754142	4.2505	0.000145668	0.0413498	-4.95236
cg38238143_BC21	cg38238143	Fam78a	Fam78a_Intron	-0.000136231	0.0628648	-4.25013	0.000145829	0.0413558	-4.95344
cg30290866_BC21	cg30290866	Arl16	Arl16_Exon	0.00023394	0.771891	4.24979	0.000145976	0.0413579	-4.95443
cg41717083_TC11	cg41717083	Rere	Rere_Intron	0.000114958	0.966144	4.24924	0.000146213	0.0413854	-4.95602
cg36850485_TC21	cg36850485	Il1rl2	Il1rl2_Promoter	0.000304826	0.886568	4.2484	0.000146574	0.0414052	-4.95844
cg46951455_BC21	cg46951455	Pygo1	Pygo1_Intron	0.000259737	0.848676	4.24794	0.000146773	0.0414052	-4.95977
cg37775971_BC21	cg37775971	Nectin4	Nectin4_Intron	0.00024424	0.697212	4.24781	0.000146829	0.0414052	-4.96015
cg28759229_TC21	cg28759229	Slc41a2	Slc41a2_Intron	0.000328396	0.715732	4.24779	0.000146842	0.0414052	-4.96023
cg38668575_BC21	cg38668575	Spi1	Spi1_Intron	0.000399448	0.765972	4.24426	0.000148383	0.0417999	-4.97047
cg44509303_TC21	cg44509303	Akt1s1	Akt1s1_Intron	-0.000145056	0.0436255	-4.24344	0.000148741	0.041861	-4.97283
cg42393622_TC21	cg42393622	Gc	Gc_Intergenic_downstream	0.000266385	0.542107	4.24297	0.00014895	0.0418799	-4.97421
cg28788462_TC21	cg28788462	Syn3	Syn3_Intron	0.000157102	0.584562	4.24193	0.000149408	0.0419689	-4.97722
cg33839267_BC11	cg33839267	Hoxc5	Hoxc5_Intron	-0.000155773	0.0390533	-4.24136	0.000149661	0.0419885	-4.97888
cg28266627_BC21	cg28266627	Tcf21	Tcf21_fiveUTR	-0.000127418	0.0556506	-4.23998	0.000150274	0.0419885	-4.98289
cg36617016_BC21	cg36617016	Oprk1	Oprk1_threeUTR	0.00038447	0.795918	4.2393	0.000150574	0.0419885	-4.98484
cg38951053_TC11	cg38951053	Il1a	Il1a_Promoter	0.000243132	0.803891	4.2393	0.000150577	0.0419885	-4.98486
cg42315285_BC21	cg42315285	Kdr	Kdr_Exon	-0.00015433	0.107044	-4.23921	0.000150618	0.0419885	-4.98513
cg39291785_BC21	cg39291785	Snai1	Snai1_Intron	0.000221485	0.647423	4.23886	0.000150772	0.0419885	-4.98613
cg30017026_BC21	cg30017026	Rapgefl1	Rapgefl1_Intron	0.000252353	0.823012	4.23866	0.00015086	0.0419885	-4.9867
cg39112071_BC11	cg39112071	Fam110a	Fam110a_Intron	-0.000449271	0.200289	-4.23827	0.000151033	0.0419885	-4.98783
cg44049656_BC11	cg44049656	Gm36582	Gm36582_Exon	0.000223075	0.879929	4.23822	0.000151055	0.0419885	-4.98797
cg36224045_BC11	cg36224045	Cemip2	Cemip2_Intergenic_upstream	0.000136738	0.948249	4.23796	0.000151173	0.0419885	-4.98873
cg40215080_BC21	cg40215080	Gpr88	Gpr88_Intergenic_downstream	0.000342253	0.849062	4.23744	0.000151406	0.0419885	-4.99024
cg34268617_BC21	cg34268617	Cmss1	Cmss1_Intron	-0.000364426	0.136093	-4.23742	0.000151414	0.0419885	-4.99029
cg46965880_BC21	cg46965880	Onecut1	Onecut1_Intergenic_downstream	0.000232318	0.87532	4.23735	0.000151447	0.0419885	-4.99051
cg36458852_TC11	cg36458852	Cuedc2	Cuedc2_Intron	0.00033699	0.723125	4.23731	0.000151463	0.0419885	-4.99061
cg44937327_TC21	cg44937327	Olfr78	Olfr78_fiveUTR	0.000255828	0.873413	4.23626	0.000151938	0.0420631	-4.99368
cg28652127_TC21	cg28652127	Gnaz	Gnaz_Intergenic_upstream	-0.000216278	0.411595	-4.23608	0.000152017	0.0420631	-4.99419
cg42245646_TC11	cg42245646	Slc30a9	Slc30a9_fiveUTR	0.000115211	0.0182702	4.23356	0.000153153	0.0422562	-5.00149
cg36285165_TC21	cg36285165	Glis3	Glis3_Intron	0.00033293	0.50068	4.23356	0.000153155	0.0422562	-5.0015
cg36054399_TC21	cg36054399	Socs6	Socs6_Exon	0.000462058	0.801114	4.23337	0.000153238	0.0422562	-5.00203
cg48179000_TC21	cg48179000	Bmx	Bmx_Promoter	0.000323888	0.586797	4.23327	0.000153285	0.0422562	-5.00234
cg28188345_TC21	cg28188345	Plagl1	Plagl1_Intron	0.000161344	0.607048	4.23215	0.000153795	0.0423358	-5.00559
cg42934789_BC21	cg42934789	Prkar1b	Prkar1b_Intron	0.00025785	0.577968	4.232	0.00015386	0.0423358	-5.00601
cg29462032_TC11	cg29462032	Adra1b	Adra1b_Intron	0.000108311	0.942689	4.23139	0.000154139	0.0423731	-5.00778
cg33625221_TC21	cg33625221	Fbln1	Fbln1_Intron	0.000235219	0.677385	4.22999	0.000154777	0.0423956	-5.01183
cg42525178_BC11	cg42525178	Zfp951	Zfp951_fiveUTR	0.000232663	0.501828	4.22997	0.000154786	0.0423956	-5.01189
cg36086633_TC21	cg36086633	Rin1	Rin1_fiveUTR	-0.000189334	0.114236	-4.22938	0.000155059	0.0423956	-5.01362
cg34027198_BC21	cg34027198	A230028O05Rik	A230028O05Rik_Promoter	0.000274247	0.851625	4.22928	0.000155105	0.0423956	-5.01391
cg36812246_TC21	cg36812246	Tmem131	Tmem131_Intron	-0.000290382	0.0975188	-4.22914	0.000155169	0.0423956	-5.01431
cg39186665_BC11	cg39186665	Lbp	Lbp_Intergenic_downstream	0.00015395	0.921408	4.2291	0.000155186	0.0423956	-5.01442
cg34588786_TC11	cg34588786	Synj2	Synj2_Intron	0.000264255	0.929803	4.22899	0.000155236	0.0423956	-5.01473
cg44521841_TC21	cg44521841	Plekha4	Plekha4_Intron	0.00029034	0.612838	4.22844	0.000155488	0.0423956	-5.01632
cg31415489_TC11	cg31415489	Serpinb9b	Serpinb9b_Promoter	0.000184389	0.648038	4.2284	0.000155509	0.0423956	-5.01646
cg36353281_BC11	cg36353281	Tnks2	Tnks2_Promoter	0.000393171	0.839403	4.22695	0.000156178	0.0424688	-5.02067
cg36254085_TC21	cg36254085	Dock8	Dock8_Intergenic_upstream	0.000364568	0.218474	4.22686	0.000156217	0.0424688	-5.02091
cg32471565_TC21	cg32471565	Rnase11	Rnase11_Promoter	0.000260549	0.843611	4.2268	0.000156246	0.0424688	-5.02109
cg29074086_TC21	cg29074086	Hmga2	Hmga2_Intron	0.000265459	0.770931	4.22657	0.000156352	0.0424688	-5.02175
cg47358900_TC21	cg47358900	Scn10a	Scn10a_fiveUTR	0.000243302	0.71907	4.22615	0.000156547	0.0424707	-5.02298
cg31701600_BC21	cg31701600	Dapk1	Dapk1_Intron	-0.000139472	0.931451	-4.22569	0.000156761	0.0424707	-5.02431
cg43555135_TC21	cg43555135	Atoh8	Atoh8_Intron	-0.000134645	0.0529109	-4.22563	0.000156789	0.0424707	-5.02449
cg33645180_TC21	cg33645180	Tbc1d22a	Tbc1d22a_Intron	0.00018358	0.609244	4.22522	0.000156979	0.0424832	-5.02568
cg41939561_BC21	cg41939561	Wdr86	Wdr86_Promoter	-0.000233799	0.123537	-4.22474	0.0001572	0.0425042	-5.02706
cg45268270_TC11	cg45268270	Ifitm6	Ifitm6_Promoter	0.000282587	0.740087	4.2235	0.000157776	0.042621	-5.03064
cg36452470_BC11	cg36452470	Kcnip2	Kcnip2_Exon	-0.000168169	0.381921	-4.22306	0.000157982	0.0426378	-5.03192
cg38244212_BC21	cg38244212	Slc25a25	Slc25a25_fiveUTR	-0.000218254	0.837746	-4.22185	0.000158548	0.0426727	-5.03542
cg42646593_TC11	cg42646593	Msi1	Msi1_Exon	-0.000135371	0.0756385	-4.2218	0.000158571	0.0426727	-5.03557
cg28735593_TC21	cg28735593	Atcayos	Atcayos_Exon	0.000273043	0.730158	4.22165	0.000158641	0.0426727	-5.036
cg36744195_TC11	cg36744195	4931408C20Rik	4931408C20Rik_Promoter	0.000151824	0.518661	4.22131	0.0001588	0.0426727	-5.03698
cg36090207_BC21	cg36090207	Catsper1	Catsper1_Intergenic_upstream	0.000165763	0.901346	4.2208	0.000159039	0.0426727	-5.03846
cg28539187_TC21	cg28539187	Col13a1	Col13a1_Intron	0.000194097	0.730872	4.22071	0.000159082	0.0426727	-5.03872
cg39758130_BC21	cg39758130	Lhfp	Lhfp_Intron	0.000256365	0.562792	4.22047	0.000159194	0.0426727	-5.03941
cg46304780_BC21	cg46304780	Galnt2	Galnt2_Intron	0.00021655	0.670233	4.22032	0.000159264	0.0426727	-5.03984
cg31714695_TC21	cg31714695	Fbp1	Fbp1_Intron	-0.000152951	0.143358	-4.21896	0.000159907	0.0427375	-5.04379
cg40796835_TC11	cg40796835	Gm21541	Gm21541_Intergenic_upstream	0.00010627	0.894689	4.21876	0.000160004	0.0427375	-5.04439
cg33618974_BC11	cg33618974	Arhgap8	Arhgap8_Promoter	0.000218474	0.901987	4.21863	0.000160064	0.0427375	-5.04475
cg47862577_TC21	cg47862577	Pja1	Pja1_Intergenic_upstream	0.000237765	0.494128	4.21815	0.000160293	0.0427375	-5.04615
cg40297048_BC21	cg40297048	Ank2	Ank2_Exon	-0.000224547	0.159399	-4.21781	0.000160453	0.0427375	-5.04713
cg32673633_TC21	cg32673633	Itm2b	Itm2b_Intergenic_upstream	0.000421583	0.506076	4.21731	0.000160688	0.0427375	-5.04856
cg37869910_BC21	cg37869910	Srp9	Srp9_Intergenic_upstream	0.00031115	0.722304	4.21717	0.000160755	0.0427375	-5.04898
cg29731915_TC21	cg29731915	Wscd1	Wscd1_Intergenic_upstream	-0.000147868	0.0851623	-4.2171	0.000160791	0.0427375	-5.04919
cg43866953_BC21	cg43866953	Hrh1	Hrh1_Intron	0.000276405	0.54006	4.21707	0.000160805	0.0427375	-5.04928
cg45269552_TC21	cg45269552	Sigirr	Sigirr_Promoter	-0.000202268	0.118531	-4.2167	0.000160977	0.0427447	-5.05032
cg35655500_BC21	cg35655500	Gpr151	Gpr151_Intron	0.000448852	0.464251	4.21619	0.00016122	0.0427709	-5.0518
cg47272916_TC21	cg47272916	Dclk3	Dclk3_Exon	-0.000151658	0.0843578	-4.21581	0.000161403	0.0427813	-5.05292
cg35403930_BC21	cg35403930	Armc4	Armc4_Intron	0.000351896	0.745544	4.2155	0.000161549	0.0427817	-5.0538
cg28542554_TC11	cg28542554	Tspan15	Tspan15_Intron	0.000309101	0.812919	4.21443	0.000162062	0.0428792	-5.05691
cg39776021_BC21	cg39776021	Ccna1	Ccna1_Intergenic_downstream	0.000171475	0.740869	4.214	0.00016227	0.0428808	-5.05817
cg28817556_BC21	cg28817556	Nr1h4	Nr1h4_fiveUTR	0.000224917	0.742508	4.21331	0.000162598	0.0428808	-5.06015
cg28755023_BC21	cg28755023	Chst11	Chst11_Intron	0.000245323	0.5504	4.21307	0.000162714	0.0428808	-5.06084
cg32517738_TC21	cg32517738	Mcpt2	Mcpt2_Exon	0.000295951	0.874939	4.21298	0.000162758	0.0428808	-5.06111
cg42598249_TC21	cg42598249	Asphd2	Asphd2_Promoter	0.000225885	0.691968	4.21291	0.000162792	0.0428808	-5.06132
cg33578974_TC21	cg33578974	Ep300	Ep300_Intergenic_upstream	-0.000448935	0.0971033	-4.21104	0.000163694	0.0430531	-5.06673
cg29976396_TC21	cg29976396	Hoxb13	Hoxb13_fiveUTR	-9.96322e-05	0.0612781	-4.21095	0.000163737	0.0430531	-5.06699
cg42216683_BC21	cg42216683	Klf3	Klf3_Intron	-0.000185146	0.0612647	-4.21053	0.000163938	0.0430677	-5.06819
cg38453801_BC21	cg38453801	Slc4a10	Slc4a10_Exon	0.000206689	0.788031	4.20995	0.000164221	0.0431035	-5.06988
cg29475490_TC21	cg29475490	F630206G17Rik	F630206G17Rik_Intergenic_upstream	-0.000279036	0.305984	-4.20898	0.00016469	0.0431884	-5.07267
cg44186930_TC21	cg44186930	Gm14548	Gm14548_Promoter	0.000232223	0.522169	4.20867	0.000164844	0.0431906	-5.07359
cg44678569_TC21	cg44678569	Igf1r	Igf1r_Intron	-0.000118742	0.0539024	-4.20829	0.000165029	0.0432007	-5.07468
cg45128120_BC11	cg45128120	AI467606	AI467606_Intergenic_downstream	-0.000194856	0.164456	-4.20776	0.000165285	0.0432248	-5.07621
cg41211282_TC21	cg41211282	Gm12709	Gm12709_Intron	0.000251104	0.655672	4.2074	0.00016546	0.0432248	-5.07724
cg35611325_TC11	cg35611325	Gm37013	Gm37013_fiveUTR	0.000516231	0.536491	4.20711	0.000165603	0.0432248	-5.07809
cg39645518_BC21	cg39645518	Mccc1	Mccc1_Exon	0.000293487	0.569541	4.20662	0.000165843	0.0432248	-5.07951
cg46765756_BC21	cg46765756	Cyp19a1	Cyp19a1_Intron	0.000275097	0.67332	4.2066	0.00016585	0.0432248	-5.07955
cg29876650_TC21	cg29876650	Tbx4	Tbx4_Intergenic_downstream	0.000384496	0.591155	4.20464	0.000166817	0.0434239	-5.08525
cg31330618_TC21	cg31330618	Zkscan3	Zkscan3_Promoter	0.000320451	0.663598	4.20445	0.000166908	0.0434239	-5.08578
cg45316098_BC21	cg45316098	Mcemp1	Mcemp1_fiveUTR	0.000408869	0.842386	4.20406	0.000167104	0.043429	-5.08693
cg34354568_TC21	cg34354568	Robo1	Robo1_Intron	0.000309567	0.719948	4.20352	0.000167365	0.043429	-5.08846
cg31256966_BC11	cg31256966	Zmynd11	Zmynd11_Intergenic_upstream	0.000335143	0.728221	4.20352	0.000167367	0.043429	-5.08847
cg43861521_BC21	cg43861521	Atp2b2	Atp2b2_Intron	-0.000131599	0.104127	-4.20315	0.000167548	0.0434378	-5.08953
cg29225793_BC21	cg29225793	Igfbp3	Igfbp3_Intergenic_upstream	0.000206375	0.480963	4.20273	0.000167759	0.0434544	-5.09076
cg31570000_BC21	cg31570000	Susd3	Susd3_fiveUTR	-8.49021e-05	0.0445882	-4.20159	0.000168324	0.0435626	-5.09405
cg34755360_BC11	cg34755360	Decr2	Decr2_fiveUTR	-0.000113634	0.0510825	-4.20012	0.000169057	0.0437141	-5.09831
cg34102388_TC21	cg34102388	Muc13	Muc13_Promoter	0.000281619	0.773539	4.19978	0.000169227	0.0437199	-5.0993
cg48222202_BC11	cg48222202	Gm3376	Gm3376_Intergenic_downstream	0.000303942	0.648267	4.19936	0.000169434	0.0437352	-5.10049
cg36214920_BC21	cg36214920	C730002L08Rik	C730002L08Rik_Intron	0.000211118	0.843267	4.19883	0.000169701	0.0437487	-5.10204
cg30317176_TC21	cg30317176	Dnmt3a	Dnmt3a_Intron	-0.000256352	0.142513	-4.19867	0.000169781	0.0437487	-5.1025
cg39004185_BC21	cg39004185	Plcb4	Plcb4_Intron	0.000235114	0.785976	4.19809	0.00017007	0.0437747	-5.10417
cg47634818_BC21	cg47634818	Gpc4	Gpc4_Promoter	0.000335683	0.825665	4.19788	0.000170178	0.0437747	-5.10479
cg33672584_BC21	cg33672584	Sbf1	Sbf1_Intron	-0.000267328	0.078182	-4.19724	0.0001705	0.0438195	-5.10664
cg38233950_BC21	cg38233950	Abl1	Abl1_Intron	-0.000139622	0.09227	-4.19513	0.000171562	0.0439895	-5.11272
cg36788334_BC21	cg36788334	Prss39	Prss39_fiveUTR	0.000203669	0.820649	4.19513	0.000171562	0.0439895	-5.11272
cg42058704_TC21	cg42058704	Stx18	Stx18_Intergenic_upstream	0.000275365	0.507872	4.1947	0.00017178	0.0439895	-5.11397
cg29150597_TC21	cg29150597	Lrp1	Lrp1_threeUTR	0.000382106	0.783874	4.1946	0.00017183	0.0439895	-5.11425
cg42525182_BC21	cg42525182	Zfp951	Zfp951_fiveUTR	0.000244957	0.50215	4.19446	0.000171905	0.0439895	-5.11468
cg37984283_TC21	cg37984283	Lamb3	Lamb3_fiveUTR	0.000484441	0.742877	4.19341	0.000172436	0.0440875	-5.1177
cg40297049_TC11	cg40297049	Ank2	Ank2_Exon	-0.000236211	0.103893	-4.19306	0.000172614	0.0440947	-5.11871
cg31008190_TC21	cg31008190	Foxn3	Foxn3_Intron	-0.000126958	0.0398322	-4.1913	0.000173511	0.0442303	-5.12379
cg41661350_TC21	cg41661350	Aadacl4	Aadacl4_Intergenic_downstream	0.000308152	0.587255	4.19116	0.000173582	0.0442303	-5.12419
cg34872826_TC21	cg34872826	Hspa1l	Hspa1l_Intron	0.000204615	0.594798	4.19094	0.000173697	0.0442303	-5.12483
cg39646346_BC21	cg39646346	Acad9	Acad9_Promoter	0.000212379	0.612691	4.19085	0.000173742	0.0442303	-5.12509
cg46714184_TC21	cg46714184	Nxpe4	Nxpe4_Intergenic_upstream	0.000192002	0.555541	4.19041	0.000173969	0.04425	-5.12637
cg40964402_BC11	cg40964402	Alad	Alad_Intron	0.000187868	0.797301	4.19	0.000174182	0.044261	-5.12757
cg38013319_TC11	cg38013319	Ucma	Ucma_Intron	0.000203691	0.624047	4.18948	0.000174445	0.044261	-5.12904
cg34456652_BC21	cg34456652	Krtap14	Krtap14_Exon	0.000224872	0.640677	4.18945	0.000174461	0.044261	-5.12913
cg32592363_BC21	cg32592363	Msra	Msra_Intron	-0.000185928	0.0891192	-4.18879	0.000174803	0.0442897	-5.13105
cg37719775_TC21	cg37719775	Adcy10	Adcy10_Promoter	0.000284327	0.767133	4.18837	0.000175021	0.0442897	-5.13227
cg35967689_TC11	cg35967689	Slc14a2	Slc14a2_Intron	0.000194276	0.911369	4.18791	0.000175258	0.0442897	-5.1336
cg43220720_TC21	cg43220720	Hyal6	Hyal6_Promoter	0.000372105	0.599872	4.18768	0.000175377	0.0442897	-5.13427
cg45970926_TC11	cg45970926	Mir8110	Mir8110_Intergenic_upstream	-0.000322411	0.492847	-4.18757	0.00017543	0.0442897	-5.13456
cg38970814_TC11	cg38970814	Rnf24	Rnf24_Intron	0.000237041	0.830714	4.18749	0.000175471	0.0442897	-5.13479
cg34062692_BC21	cg34062692	Cpn2	Cpn2_Intergenic_downstream	-9.39257e-05	0.961723	-4.18685	0.000175805	0.0443225	-5.13665
cg38832429_BC21	cg38832429	BC052040	BC052040_Intron	-0.000320147	0.840985	-4.18643	0.000176023	0.0443225	-5.13786
cg45309703_TC21	cg45309703	Mrgprf	Mrgprf_Promoter	0.0001753	0.439812	4.18638	0.00017605	0.0443225	-5.13802
cg35022819_TC21	cg35022819	C330011F03Rik	C330011F03Rik_Intergenic_upstream	0.000241551	0.730618	4.18573	0.000176385	0.044369	-5.13988
cg44186691_TC11	cg44186691	Pira2	Pira2_Intergenic_downstream	0.000204891	0.934656	4.18457	0.00017699	0.0444833	-5.14323
cg42163784_TC21	cg42163784	Gm10440	Gm10440_Intron	0.000308892	0.656557	4.184	0.000177286	0.0445201	-5.14487
cg46279069_TC21	cg46279069	Galnt2	Galnt2_Exon	0.000400159	0.756122	4.18342	0.000177593	0.0445593	-5.14656
cg40953504_BC11	cg40953504	Slc46a2	Slc46a2_Promoter	0.000276907	0.886855	4.18249	0.00017808	0.0446437	-5.14924
cg46309877_TC21	cg46309877	Galnt2	Galnt2_Intron	0.000217889	0.742964	4.18067	0.000179036	0.0448453	-5.15448
cg29837965_TC21	cg29837965	Ccl8	Ccl8_Promoter	0.000244616	0.8182	4.18034	0.00017921	0.0448509	-5.15544
cg30869904_BC21	cg30869904	Pcnx	Pcnx_Promoter	0.000244295	0.683844	4.17892	0.000179965	0.045002	-5.15956
cg30797126_BC21	cg30797126	Hif1a	Hif1a_Intergenic_upstream	0.000274071	0.669363	4.17708	0.000180942	0.0452081	-5.16486
cg35745662_TC21	cg35745662	Zfp608	Zfp608_Intergenic_upstream	0.000264912	0.896632	4.17559	0.00018174	0.0453521	-5.16916
cg38168571_BC21	cg38168571	Notch1	Notch1_Intron	0.000253453	0.718611	4.17543	0.000181825	0.0453521	-5.16962
cg44333424_TC21	cg44333424	4732471J01Rik	4732471J01Rik_Intron	0.000426534	0.706551	4.17377	0.000182718	0.0455364	-5.17442
cg31417618_BC21	cg31417618	Serpinb9g	Serpinb9g_Intron	0.000403979	0.54591	4.17338	0.000182926	0.0455447	-5.17554
cg45461014_BC21	cg45461014	Mrps31	Mrps31_Promoter	0.000296847	0.688616	4.17313	0.000183059	0.0455447	-5.17624
cg38183249_BC11	cg38183249	Rxra	Rxra_Intergenic_downstream	0.000236729	0.753895	4.17226	0.00018353	0.0456235	-5.17876
cg35682175_TC21	cg35682175	Mospd4	Mospd4_Intergenic_downstream	0.000238358	0.515192	4.17062	0.00018442	0.0457755	-5.1835
cg45791141_TC21	cg45791141	Psd3	Psd3_fiveUTR	-0.000116619	0.0606396	-4.17051	0.000184479	0.0457755	-5.18381
cg46625206_BC11	cg46625206	Zfp202	Zfp202_Intergenic_downstream	0.000285282	0.664203	4.17028	0.000184605	0.0457755	-5.18448
cg43390362_BC11	cg43390362	AI854703	AI854703_Exon	-0.000452039	0.331438	-4.16925	0.000185167	0.0458705	-5.18746
cg31145841_BC21	cg31145841	Tnfaip2	Tnfaip2_Promoter	0.000296863	0.621976	4.16858	0.000185529	0.0458705	-5.18937
cg42785092_BC21	cg42785092	Ncor2	Ncor2_Intron	-0.000103483	0.0748455	-4.16853	0.000185556	0.0458705	-5.18951
cg30227623_BC21	cg30227623	Rnf157	Rnf157_Intron	-0.000392712	0.272772	-4.16829	0.000185688	0.0458705	-5.19021
cg38665305_BC11	cg38665305	Agbl2	Agbl2_Promoter	-0.000137972	0.0334713	-4.16816	0.000185763	0.0458705	-5.1906
cg42437670_BC11	cg42437670	Cxcl13	Cxcl13_Intergenic_upstream	-0.000755691	0.593271	-4.1675	0.000186124	0.04588	-5.1925
cg44723705_TC11	cg44723705	Mir7234	Mir7234_Intergenic_downstream	0.000298817	0.842288	4.16662	0.000186604	0.04588	-5.19502
cg28790059_BC21	cg28790059	Syn3	Syn3_Intron	0.000289288	0.744992	4.16659	0.00018662	0.04588	-5.19511
cg33324702_TC21	cg33324702	Trps1	Trps1_Intron	0.000230094	0.861047	4.1664	0.000186724	0.04588	-5.19565
cg40041409_BC21	cg40041409	Celf3	Celf3_Intron	0.00024013	0.559129	4.16639	0.000186729	0.04588	-5.19568
cg33776515_TC21	cg33776515	Adcy6	Adcy6_Exon	0.000199543	0.866419	4.16639	0.000186731	0.04588	-5.19569
cg40280107_TC21	cg40280107	Tram1l1	Tram1l1_Intron	0.000251834	0.859086	4.16439	0.000187834	0.0460909	-5.20145
cg46695540_BC21	cg46695540	Apoa4	Apoa4_fiveUTR	0.000203829	0.509428	4.16427	0.0001879	0.0460909	-5.2018
cg42024259_BC21	cg42024259	Htt	Htt_Exon	-0.000117826	0.948994	-4.16353	0.00018831	0.0461071	-5.20393
cg32795989_TC21	cg32795989	Pcdh9	Pcdh9_Intergenic_downstream	0.000367843	0.527683	4.16347	0.000188346	0.0461071	-5.20412
cg38801379_BC21	cg38801379	Slc5a12	Slc5a12_Exon	0.000261579	0.643196	4.16331	0.000188434	0.0461071	-5.20458
cg41415016_BC21	cg41415016	Oscp1	Oscp1_Intron	0.000311989	0.62393	4.1623	0.000188993	0.0461431	-5.20748
cg36071081_TC21	cg36071081	Chka	Chka_Intron	0.000290725	0.765481	4.16223	0.000189032	0.0461431	-5.20768
cg28289854_BC11	cg28289854	Epb41l2	Epb41l2_fiveUTR	0.000248841	0.856942	4.1622	0.000189048	0.0461431	-5.20776
cg32245475_TC21	cg32245475	Plau	Plau_threeUTR	0.000409388	0.819383	4.1619	0.000189214	0.0461455	-5.20862
cg30224391_TC21	cg30224391	Acox1	Acox1_Intron	0.000180161	0.911832	4.15998	0.000190287	0.046325	-5.21415
cg36821829_TC21	cg36821829	2010300C02Rik	2010300C02Rik_Intergenic_upstream	0.000205964	0.523929	4.15979	0.000190394	0.046325	-5.2147
cg40021872_BC21	cg40021872	S100a9	S100a9_Promoter	0.000196719	0.51095	4.15975	0.00019042	0.046325	-5.21484
cg30911183_BC11	cg30911183	Jdp2	Jdp2_Intergenic_upstream	-0.000304133	0.18873	-4.15865	0.000191035	0.0463945	-5.21799
cg46467045_BC21	cg46467045	Chordc1	Chordc1_Intergenic_upstream	-0.000259297	0.52542	-4.15835	0.000191204	0.0463945	-5.21886
cg33688006_BC21	cg33688006	Kif21a	Kif21a_Exon	0.000204807	0.826022	4.15829	0.00019124	0.0463945	-5.21904
cg34279144_TC21	cg34279144	Olfr181	Olfr181_Promoter	0.000318668	0.788762	4.15812	0.000191332	0.0463945	-5.21952
cg30295572_BC21	cg30295572	Rac3	Rac3_Promoter	-0.000195145	0.187865	-4.15633	0.000192343	0.0466014	-5.22467
cg40440314_BC11	cg40440314	Sh3glb1	Sh3glb1_Intergenic_downstream	0.000192714	0.83632	4.15599	0.000192536	0.04661	-5.22565
cg36322029_BC21	cg36322029	Minpp1	Minpp1_Promoter	-8.15491e-05	0.0409882	-4.15474	0.000193246	0.0466221	-5.22926
cg44555986_BC21	cg44555986	Nav2	Nav2_Intron	0.000238356	0.451288	4.15461	0.000193324	0.0466221	-5.22965
cg37246641_TC21	cg37246641	Kif1a	Kif1a_Intron	0.00016345	0.655155	4.1546	0.000193325	0.0466221	-5.22966
cg41661222_TC11	cg41661222	Aadacl4	Aadacl4_Exon	0.000237667	0.632476	4.1544	0.000193439	0.0466221	-5.23023
cg34493298_TC21	cg34493298	Donson	Donson_Intron	0.000218938	0.5942	4.15425	0.000193525	0.0466221	-5.23067
cg40940293_TC21	cg40940293	Lpar1	Lpar1_Intron	0.000230061	0.783001	4.15424	0.00019353	0.0466221	-5.2307
cg41114933_TC21	cg41114933	Ifnb1	Ifnb1_Intergenic_downstream	0.000228289	0.786662	4.15368	0.000193852	0.0466615	-5.23232
cg33162469_TC21	cg33162469	Retreg1	Retreg1_Intron	-0.000223153	0.0866204	-4.15287	0.000194315	0.0467351	-5.23466
cg31731927_BC11	cg31731927	Spata31d1c	Spata31d1c_Promoter	0.000244882	0.708036	4.15253	0.000194509	0.0467437	-5.23563
cg37316634_BC21	cg37316634	Bcl2	Bcl2_Intron	0.000350295	0.820678	4.1517	0.000194982	0.0468194	-5.23801
cg46047373_BC21	cg46047373	Got2	Got2_Intergenic_upstream	0.000321658	0.77491	4.15113	0.000195309	0.0468598	-5.23965
cg47462919_BC11	cg47462919	Bcor	Bcor_Intron	0.000134989	0.0337238	4.1501	0.000195903	0.0469566	-5.24262
cg37952631_BC21	cg37952631	LOC102632463	LOC102632463_Intron	-0.000163062	0.884391	-4.14988	0.000196029	0.0469566	-5.24325
cg41958716_TC21	cg41958716	Dpp6	Dpp6_Intron	0.000238005	0.670038	4.14864	0.000196748	0.0470908	-5.24684
cg37133734_BC21	cg37133734	Serpine2	Serpine2_Intron	0.000495769	0.78426	4.14817	0.000197022	0.0471182	-5.2482
cg39667086_TC21	cg39667086	Ankrd50	Ankrd50_Intergenic_upstream	0.000256443	0.822814	4.14726	0.00019755	0.0471881	-5.25082
cg39378479_BC11	cg39378479	Stx16	Stx16_Intergenic_upstream	0.000250633	0.868688	4.14709	0.000197648	0.0471881	-5.2513
cg47712758_BC21	cg47712758	Fmr1nb	Fmr1nb_fiveUTR	0.00034723	0.844603	4.14684	0.000197793	0.0471881	-5.25202
cg32608382_BC21	cg32608382	Scara3	Scara3_Intron	0.00025587	0.764807	4.14604	0.000198258	0.0472424	-5.25432
cg40796397_BC11	cg40796397	Ccl27a	Ccl27a_Intergenic_upstream	0.000126986	0.780209	4.14586	0.000198364	0.0472424	-5.25484
cg33670572_TC21	cg33670572	Plxnb2	Plxnb2_Exon	0.000246385	0.833481	4.14518	0.00019876	0.0472424	-5.25679
cg47278879_BC11	cg47278879	Arpp21	Arpp21_threeUTR	0.000200918	0.9395	4.1451	0.000198804	0.0472424	-5.25701
cg29153993_BC21	cg29153993	Rdh16f2	Rdh16f2_Intron	0.000271331	0.68882	4.14487	0.000198942	0.0472424	-5.25769
cg34267835_TC21	cg34267835	Cmss1	Cmss1_fiveUTR	0.000204531	0.76355	4.14481	0.000198977	0.0472424	-5.25786
cg39169228_BC21	cg39169228	Ndrg3	Ndrg3_Intergenic_downstream	0.000229311	0.612476	4.14388	0.000199518	0.0472696	-5.26052
cg28696536_TC21	cg28696536	Olfr1358	Olfr1358_Exon	0.000214244	0.687831	4.14382	0.000199559	0.0472696	-5.26072
cg47564440_BC21	cg47564440	Tmem255a	Tmem255a_Intron	0.000333915	0.762413	4.1438	0.000199571	0.0472696	-5.26077
cg28393913_BC21	cg28393913	Armc2	Armc2_Intron	0.000385453	0.858388	4.14321	0.000199915	0.0473131	-5.26246
cg44838782_TC21	cg44838782	Me3	Me3_Intron	-0.000199645	0.484609	-4.14223	0.000200492	0.0474119	-5.26528
cg32900036_TC21	cg32900036	Slitrk1	Slitrk1_Intergenic_downstream	0.000380373	0.76412	4.14111	0.000201155	0.0475308	-5.26851
cg38245599_BO21	cg38245599	Fam102a	Fam102a_Intron	-0.000228865	0.118857	-4.14042	0.000201562	0.0475884	-5.27049
cg43277985_TC21	cg43277985	Plxna4	Plxna4_Intron	0.000212583	0.868669	4.14015	0.000201721	0.0475884	-5.27126
cg44057040_TC21	cg44057040	Grin2b	Grin2b_fiveUTR	-0.000271115	0.335685	-4.13891	0.000202458	0.0477243	-5.27483
cg34384287_BC21	cg34384287	Mir99ahg	Mir99ahg_Intergenic_upstream	0.000336805	0.867663	4.1377	0.000203181	0.0478266	-5.27832
cg29353718_BC21	cg29353718	Mir216c	Mir216c_Promoter	0.000355441	0.816787	4.13763	0.000203223	0.0478266	-5.27852
cg31121692_BC21	cg31121692	Mir495	Mir495_Promoter	0.000303821	0.842702	4.13705	0.000203572	0.0478266	-5.2802
cg29275918_TC21	cg29275918	Egfr	Egfr_Intron	0.000377298	0.721142	4.13701	0.000203591	0.0478266	-5.28029
cg36789132_BC21	cg36789132	Amer3	Amer3_Intron	0.000245339	0.741224	4.13651	0.000203891	0.0478266	-5.28173
cg36706671_TC21	cg36706671	Efhc1	Efhc1_Promoter	-0.000302912	0.55104	-4.13635	0.000203989	0.0478266	-5.2822
cg30348793_BC21	cg30348793	Hs1bp3	Hs1bp3_Intergenic_downstream	-0.000170793	0.177829	-4.13616	0.000204101	0.0478266	-5.28273
cg38204873_BC21	cg38204873	Rapgef1	Rapgef1_Intron	0.000203766	0.792792	4.13596	0.000204221	0.0478266	-5.28331
cg40638850_BC21	cg40638850	Tmem64	Tmem64_Intron	-0.000240282	0.0929656	-4.13575	0.000204346	0.0478266	-5.28391
cg34501238_BC21	cg34501238	Rcan1	Rcan1_Intron	0.000297676	0.886563	4.13526	0.000204641	0.0478579	-5.28532
cg47088596_TC21	cg47088596	Plscr2	Plscr2_Promoter	0.000238729	0.860551	4.13457	0.000205059	0.0479179	-5.28732
cg44670973_BC21	cg44670973	Lrrc28	Lrrc28_Intergenic_downstream	-0.000123528	0.0644428	-4.13373	0.000205565	0.0479682	-5.28973
cg38186345_TC21	cg38186345	Fcnb	Fcnb_Promoter	0.000248463	0.771896	4.13343	0.000205745	0.0479682	-5.29058
cg37416639_TC21	cg37416639	Gpr39	Gpr39_Intron	0.000185371	0.489972	4.13341	0.000205761	0.0479682	-5.29066
cg39603224_TC21	cg39603224	Gpr160	Gpr160_Intron	0.000191965	0.877252	4.13221	0.000206487	0.0480934	-5.29411
cg47905662_TC21	cg47905662	Atrx	Atrx_Intron	0.000407509	0.853243	4.13198	0.000206623	0.0480934	-5.29475
cg32052986_TC21	cg32052986	Pde4d	Pde4d_Intron	-0.000236563	0.0860647	-4.13002	0.000207819	0.0483337	-5.30039
cg29873305_TC21	cg29873305	Bcas3	Bcas3_Intron	0.00031776	0.813517	4.12882	0.000208555	0.0484295	-5.30385
cg28387446_BC21	cg28387446	Ak9	Ak9_Intron	-0.000213716	0.923243	-4.12881	0.000208557	0.0484295	-5.30387
cg45027190_TC21	cg45027190	Sox6	Sox6_Intron	0.000187295	0.743906	4.12781	0.000209173	0.0485343	-5.30675
cg28807197_BC21	cg28807197	Gnptab	Gnptab_Intron	0.000233936	0.504966	4.1264	0.000210039	0.0486971	-5.31079
cg38864179_TC11	cg38864179	Gm14207	Gm14207_Intergenic_downstream	0.000214768	0.705936	4.12587	0.000210371	0.0487359	-5.31233
cg32803058_BC21	cg32803058	Pcdh9	Pcdh9_fiveUTR	-0.000106578	0.042675	-4.12552	0.000210583	0.0487469	-5.31332
cg31631202_TC21	cg31631202	Hk3	Hk3_Exon	0.000400623	0.770625	4.12439	0.000211286	0.0488287	-5.31658
cg33948206_BC11	cg33948206	Fgd4	Fgd4_threeUTR	0.000582815	0.816716	4.12435	0.00021131	0.0488287	-5.31669
cg36392484_TC21	cg36392484	Tll2	Tll2_Intron	0.000240584	0.578748	4.12415	0.000211431	0.0488287	-5.31725
cg42538833_BC21	cg42538833	Gm32921	Gm32921_Promoter	0.000314305	0.551067	4.12353	0.000211818	0.0488799	-5.31904
cg31203252_TC21	cg31203252	Dnah11	Dnah11_Promoter	-0.000220745	0.123533	-4.12169	0.000212965	0.049068	-5.32432
cg35288778_BC21	cg35288778	4933433H22Rik	4933433H22Rik_Intergenic_downstream	0.000303516	0.603253	4.12136	0.000213173	0.0490779	-5.32528
cg39954944_BC21	cg39954944	Fhdc1	Fhdc1_Exon	0.000394873	0.764667	4.12092	0.000213451	0.049079	-5.32655
cg47220796_BC11	cg47220796	Rad54l2	Rad54l2_Promoter	0.000318584	0.190853	4.12071	0.000213578	0.049079	-5.32713
cg44138865_TC11	cg44138865	Bcat1	Bcat1_Intergenic_downstream	-0.000246155	0.155185	-4.12056	0.000213675	0.049079	-5.32758
cg29906305_TC21	cg29906305	Msi2	Msi2_Intron	0.000196497	0.89257	4.11993	0.000214071	0.049118	-5.32939
cg38830851_BC21	cg38830851	3110099E03Rik	3110099E03Rik_Intron	-0.000269381	0.4477	-4.11976	0.000214177	0.049118	-5.32987
cg33384798_TC21	cg33384798	Mtss1	Mtss1_Intron	0.000319432	0.84849	4.11861	0.000214901	0.0492417	-5.33317
cg46031166_TC21	cg46031166	Adgrg1	Adgrg1_Intron	0.000223457	0.51554	4.11838	0.000215049	0.0492417	-5.33384
cg36341848_BC11	cg36341848	Kif20b	Kif20b_Intergenic_downstream	0.000147903	0.935595	4.1181	0.000215221	0.049243	-5.33463
cg38942856_BC21	cg38942856	Morrbid	Morrbid_Promoter	0.000192672	0.817974	4.11743	0.000215646	0.0493023	-5.33656
cg47433091_TC21	cg47433091	Gm6787	Gm6787_Exon	-0.000296405	0.79124	-4.11637	0.000216319	0.0494082	-5.3396
cg46604558_BC11	cg46604558	Pate9	Pate9_Exon	0.00022097	0.722333	4.11601	0.000216545	0.0494082	-5.34063
cg40799074_TO21	cg40799074	Ccl27b	Ccl27b_Intron	0.000198256	0.725763	4.11566	0.000216768	0.0494082	-5.34163
cg30039250_TC21	cg30039250	Rab5c	Rab5c_Intron	-0.000281269	0.182856	-4.11564	0.000216783	0.0494082	-5.3417
cg45265512_BC21	cg45265512	Bet1l	Bet1l_Intron	-0.000167481	0.0820227	-4.11539	0.000216944	0.0494082	-5.34242
cg30277935_BC21	cg30277935	Rptor	Rptor_Intergenic_upstream	0.000216255	0.846643	4.1144	0.000217576	0.0495141	-5.34527
cg35832471_BC11	cg35832471	Nedd4l	Nedd4l_Intergenic_upstream	0.000214148	0.880399	4.11377	0.000217975	0.049523	-5.34706
cg28499873_TC21	cg28499873	BB019430	BB019430_Exon	0.000218257	0.899815	4.11358	0.0002181	0.049523	-5.34762
cg37094021_TC21	cg37094021	Nhej1	Nhej1_Intron	0.000243461	0.60572	4.11355	0.000218117	0.049523	-5.3477
cg44143972_TC11	cg44143972	1700073E17Rik	1700073E17Rik_Intergenic_upstream	0.000263565	0.776056	4.11302	0.00021846	0.0495627	-5.34923
cg30250621_TC21	cg30250621	Tmem235	Tmem235_Intron	0.000219272	0.624458	4.11202	0.0002191	0.04967	-5.3521
cg40164842_TC21	cg40164842	Eps8l3	Eps8l3_Intergenic_upstream	0.000211434	0.683504	4.11164	0.000219345	0.0496874	-5.35319
cg29621459_TC21	cg29621459	Kcnj12	Kcnj12_Intron	0.000253286	0.821392	4.11112	0.000219676	0.0497244	-5.35466
