# Supplementary material for: Intermittent Hypoxia Mimicking Sleep Apnea Induces Systemic and Tissue Specific Epigenetic Changes and p16-Mediated Cellular Senescence Underlying Vascular Dysfunction
Source: Research Square preprint supplement (doi:10.21203/rs.3.rs-9371471/v1), 2026-04-15
Supplement: Supplementary file 4 [file 62c142b95061095b29317688.xlsx]

## Sheet: Sheet1
Supplementary Table S1: Differentially Methylated Positions (DMPs) in left cardiac ventricle samples.
Probe_ID	CGid	SYMBOL	GeneRegionID	logFC	AveExpr	t	P.Value	adj.P.Val	B
cg31946054_BC21	cg31946054	Fam169a	Fam169a_Intron	-0.000606761	0.666108	-9.50937	1.50528e-11	3.73767e-06	11.3609
cg43535430_BC21	cg43535430	Rprl1	Rprl1_Intergenic_upstream	-0.00109991	0.458223	-9.2397	3.23707e-11	3.73767e-06	10.5831
cg42017880_BC11	cg42017880	Poln	Poln_Exon	-0.00169179	0.525948	-8.87784	9.17507e-11	6.79116e-06	9.52554
cg48171163_BC21	cg48171163	Ctps2	Ctps2_Intron	-0.000655735	0.749329	-8.62717	1.90622e-10	9.40623e-06	8.78387
cg40796879_TC21	cg40796879	Gm21541	Gm21541_Intergenic_upstream	-0.000248624	0.311036	-8.20642	6.61413e-10	2.79749e-05	7.52322
cg35334288_BC21	cg35334288	Msh2	Msh2_Intergenic_upstream	-0.00034798	0.442981	-8.15775	7.64801e-10	2.83043e-05	7.37615
cg29166037_TC21	cg29166037	Pym1	Pym1_Intron	-0.000506565	0.468624	-8.0905	9.35155e-10	3.0061e-05	7.17256
cg43886992_TC21	cg43886992	Olfr211	Olfr211_Promoter	-0.000644208	0.533325	-8.06304	1.01534e-09	3.0061e-05	7.0893
cg34878005_BC21	cg34878005	Ddx39b	Ddx39b_Exon	-0.000411635	0.576539	-8.0098	1.19115e-09	3.20605e-05	6.92766
cg32010623_BC21	cg32010623	Srek1	Srek1_Exon	-0.000658451	0.448855	-7.92226	1.54994e-09	3.45035e-05	6.66125
cg32191110_TC21	cg32191110	3830406C13Rik	3830406C13Rik_Intron	-0.00128838	0.610451	-7.87885	1.76662e-09	3.45035e-05	6.52888
cg33725315_BC21	cg33725315	Irak4	Irak4_threeUTR	-0.000648634	0.255726	-7.86979	1.81556e-09	3.45035e-05	6.50124
cg33948445_TC21	cg33948445	Fgd4	Fgd4_Intron	-0.000597934	0.828215	-7.86096	1.86461e-09	3.45035e-05	6.47427
cg48230232_BC21	cg48230232	Gm3376	Gm3376_Intergenic_downstream	-0.000946275	0.45818	-7.80753	2.19126e-09	3.81628e-05	6.31101
cg31831048_BC21	cg31831048	Arrdc3	Arrdc3_Intergenic_upstream	-0.000682094	0.752024	-7.779	2.38887e-09	3.92929e-05	6.2237
cg36708998_TC21	cg36708998	Tmem14a	Tmem14a_Exon	-0.000888274	0.537997	-7.70986	2.94571e-09	4.59019e-05	6.01186
cg39793704_TC21	cg39793704	Ankub1	Ankub1_Intron	-0.000303674	0.516013	-7.64131	3.62761e-09	5.15493e-05	5.8014
cg42264794_BC21	cg42264794	Gabrg1	Gabrg1_Exon	-0.000591114	0.60945	-7.63871	3.65635e-09	5.15493e-05	5.79343
cg47757125_TC21	cg47757125	Cldn34d	Cldn34d_Intergenic_upstream	-0.000996369	0.564354	-7.6083	4.01087e-09	5.39772e-05	5.69991
cg36113527_TC11	cg36113527	Rps6ka4	Rps6ka4_Exon	0.00026503	0.0789643	7.51223	5.37576e-09	6.92e-05	5.404
cg35575878_BC21	cg35575878	Epb41l4a	Epb41l4a_Intron	-0.000419188	0.468504	-7.42995	6.9132e-09	8.5283e-05	5.14998
cg36140104_BC21	cg36140104	Incenp	Incenp_Exon	-0.000632191	0.509146	-7.41155	7.31395e-09	8.66177e-05	5.09308
cg39545637_TC21	cg39545637	Tbl1xr1	Tbl1xr1_Exon	-0.0004555	0.638591	-7.38348	7.97084e-09	8.97805e-05	5.00625
cg36808659_TC21	cg36808659	Fam178b	Fam178b_Exon	-0.000538811	0.609243	-7.37473	8.1875e-09	8.97805e-05	4.97917
cg45088603_TC21	cg45088603	Rbbp6	Rbbp6_Intergenic_upstream	-0.000962767	0.619783	-7.34419	8.9915e-09	9.2387e-05	4.88462
ctl-BS-RPS6KA5-CA-R-15545_BC21				-0.000697335	0.734298	-7.3421	9.04929e-09	9.2387e-05	4.87815
cg31229570_TC21	cg31229570	1700016G22Rik	1700016G22Rik_Intron	-0.000507738	0.825096	-7.32319	9.59013e-09	9.32533e-05	4.81956
cg29299360_BC21	cg29299360	Actr2	Actr2_Intron	-0.000388479	0.647276	-7.31734	9.76409e-09	9.32533e-05	4.80142
cg38112794_BC11	cg38112794	Armc3	Armc3_Exon	-0.000665855	0.777311	-7.30133	1.02562e-08	9.35267e-05	4.7518
cg41283911_BC11	cg41283911	Agbl4	Agbl4_Intron	-0.00101499	0.576939	-7.29603	1.04245e-08	9.35267e-05	4.73537
cg28879261_BC11	cg28879261	Nudt4	Nudt4_Exon	-0.000487235	0.754466	-7.26506	1.1466e-08	9.71983e-05	4.63928
cg44819675_BC21	cg44819675	Vmn2r73	Vmn2r73_Intergenic_downstream	-0.000480893	0.386512	-7.25917	1.16754e-08	9.71983e-05	4.62102
cg47498557_TC21	cg47498557	Mir221	Mir221_Intergenic_downstream	-0.000693667	0.415891	-7.25521	1.18186e-08	9.71983e-05	4.60872
cg48213042_TC21	cg48213042	Kdm5d	Kdm5d_Intron	-0.000854981	0.550128	-7.21631	1.33218e-08	0.000102609	4.48794
cg47115414_TC21	cg47115414	Tfdp2	Tfdp2_Intron	-0.000689231	0.595111	-7.21266	1.34727e-08	0.000102609	4.47657
cg30565407_TC21	cg30565407	Etv1	Etv1_Intergenic_downstream	-0.00121107	0.587709	-7.21161	1.35163e-08	0.000102609	4.47331
cg31278353_BC21	cg31278353	Prl2c2	Prl2c2_Exon	-0.000375239	0.547136	-7.15665	1.60113e-08	0.000118512	4.30245
cg29084455_TC21	cg29084455	4930432O09Rik	4930432O09Rik_Promoter	-0.000941766	0.625183	-7.12224	1.78046e-08	0.00012567	4.1954
cg28879261_BC21	cg28879261	Nudt4	Nudt4_Exon	-0.000686765	0.669827	-7.12183	1.78274e-08	0.00012567	4.19411
cg32368089_BC21	cg32368089	9230112D13Rik	9230112D13Rik_Exon	-0.000486404	0.691097	-7.09811	1.91821e-08	0.00012651	4.12026
cg28346725_BC21	cg28346725	Frk	Frk_Intergenic_downstream	-0.00127527	0.416641	-7.09689	1.9255e-08	0.00012651	4.11644
ctl-BS-RPS6KB1-CT-F-37900_TC21				-0.000718435	0.820353	-7.09195	1.95511e-08	0.00012651	4.10105
cg43867287_BC21	cg43867287	Hrh1	Hrh1_Intron	-0.000588318	0.792613	-7.0657	2.12032e-08	0.000131872	4.01927
cg29061709_TC21	cg29061709	Grip1	Grip1_Intron	-0.000724131	0.639802	-7.06302	2.13796e-08	0.000131872	4.01092
cg47560897_TC21	cg47560897	Rhox3g	Rhox3g_Intron	-0.000463143	0.406328	-7.04004	2.29546e-08	0.000136857	3.93928
cg31852653_TC21	cg31852653	Mef2c	Mef2c_Exon	-0.00095445	0.65225	-7.02922	2.37359e-08	0.000136857	3.90554
cg48094733_TC21	cg48094733	Lrch2	Lrch2_Intron	-0.000536694	0.566681	-7.02615	2.39625e-08	0.000136857	3.89596
cg46436172_TC21	cg46436172	Ccdc82	Ccdc82_Intron	-0.000662392	0.810451	-7.01254	2.49936e-08	0.000136857	3.8535
cg30067793_BC21	cg30067793	Meioc	Meioc_Promoter	-0.0007432	0.63697	-7.01041	2.51591e-08	0.000136857	3.84686
cg42001448_BC21	cg42001448	Plb1	Plb1_Intergenic_downstream	-0.000753896	0.472569	-6.99516	2.63756e-08	0.000136857	3.79927
cg32649000_TC21	cg32649000	Ppp3cc	Ppp3cc_Intron	-0.000778267	0.653109	-6.9934	2.65191e-08	0.000136857	3.7938
cg40033303_TC21	cg40033303	Flg2	Flg2_Intergenic_downstream	-0.000584277	0.324377	-6.9925	2.65935e-08	0.000136857	3.79098
cg39397104_TC21	cg39397104	Gm14325	Gm14325_Intron	-0.000929568	0.508061	-6.99055	2.67549e-08	0.000136857	3.78488
cg47584642_TC21	cg47584642	Sh2d1a	Sh2d1a_Intergenic_upstream	-0.000904741	0.578847	-6.98988	2.68102e-08	0.000136857	3.7828
cg43329045_TC11	cg43329045	Luc7l2	Luc7l2_Promoter	-0.000381607	0.785898	-6.97914	2.77168e-08	0.000139087	3.74929
cg47642653_TC21	cg47642653	Plac1	Plac1_Intron	-0.00123048	0.466803	-6.94306	3.0997e-08	0.000148457	3.6366
cg28216690_TC21	cg28216690	Cited2	Cited2_Intron	-0.000500967	0.616187	-6.94147	3.11503e-08	0.000148457	3.63163
cg42988784_TC21	cg42988784	Daglb	Daglb_Promoter	-0.000946615	0.486995	-6.92675	3.26048e-08	0.000150833	3.58566
cg48213632_BC21	cg48213632	Eif2s3y	Eif2s3y_Exon	-0.00149445	0.351061	-6.921	3.31913e-08	0.000151184	3.5677
cg48063970_TC21	cg48063970	Irs4	Irs4_Intergenic_upstream	-0.000877219	0.529923	-6.89898	3.55384e-08	0.000159422	3.49888
cg30981883_TC21	cg30981883	1700019M22Rik	1700019M22Rik_Intergenic_downstream	-0.0011092	0.758536	-6.88852	3.67114e-08	0.00016201	3.46617
cg41369927_TC21	cg41369927	Gm12886	Gm12886_Promoter	-0.000608848	0.649742	-6.88418	3.72098e-08	0.00016201	3.45259
cg28850636_TC21	cg28850636	Gm17745	Gm17745_Intergenic_downstream	-0.000423712	0.369217	-6.84663	4.18131e-08	0.000179415	3.33514
cg31746935_BC11	cg31746935	Zfp729b	Zfp729b_Promoter	0.000386072	0.13946	6.83232	4.37153e-08	0.00018453	3.29034
cg46791206_TC21	cg46791206	Snupn	Snupn_Intron	-0.000468175	0.376141	-6.82458	4.4779e-08	0.00018453	3.26614
cg38105398_BC21	cg38105398	Dnajc1	Dnajc1_Intron	-0.000576852	0.809256	-6.82128	4.52405e-08	0.00018453	3.25582
cg47591541_BC21	cg47591541	Tex13c1	Tex13c1_Intergenic_downstream	-0.000799774	0.712946	-6.81622	4.59583e-08	0.00018453	3.23997
cg33915786_TC21	cg33915786	Snx29	Snx29_Intron	-0.000778427	0.70697	-6.81508	4.61215e-08	0.00018453	3.2364
cg45192135_TC21	cg45192135	4930483O08Rik	4930483O08Rik_Promoter	-0.000185867	0.578407	-6.80338	4.7831e-08	0.000186133	3.19976
cg31780063_BC21	cg31780063	Irx1	Irx1_Intron	-0.000465825	0.425732	-6.80044	4.82699e-08	0.000186133	3.19057
cg39948615_TC21	cg39948615	Tlr2	Tlr2_Intergenic_upstream	-0.000467176	0.516515	-6.78573	5.05296e-08	0.000186133	3.14451
cg31449388_BC21	cg31449388	Rreb1	Rreb1_Intergenic_upstream	-0.000732312	0.345418	-6.78162	5.11801e-08	0.000186133	3.13164
cg30042115_TC21	cg30042115	Stat3	Stat3_Intron	-0.000343105	0.504708	-6.78108	5.12666e-08	0.000186133	3.12994
cg43854066_TC21	cg43854066	Brpf1	Brpf1_Exon	-0.000595474	0.752514	-6.78103	5.12747e-08	0.000186133	3.12978
cg34288242_BC21	cg34288242	Epha6	Epha6_Intron	-0.000447397	0.478469	-6.77895	5.16077e-08	0.000186133	3.12326
cg31906191_TC21	cg31906191	Tent2	Tent2_Intron	-0.000545387	0.845582	-6.7754	5.21804e-08	0.000186133	3.11216
cg34421694_TC21	cg34421694	4930553E22Rik	4930553E22Rik_Intron	-0.000759126	0.550681	-6.75568	5.54848e-08	0.000194733	3.05036
cg40629840_TC21	cg40629840	Runx1t1	Runx1t1_Intron	-0.000327903	0.771168	-6.75324	5.59066e-08	0.000194733	3.04274
cg47360936_BC21	cg47360936	Wdr48	Wdr48_Promoter	-0.000452726	0.746354	-6.73821	5.85861e-08	0.000201693	2.99562
cg35868976_TC21	cg35868976	Ldlrad4	Ldlrad4_Exon	-0.000631112	0.477002	-6.73097	5.99219e-08	0.000201832	2.97294
cg47631089_BC21	cg47631089	Hs6st2	Hs6st2_Exon	-0.000787592	0.266316	-6.72698	6.06717e-08	0.000201832	2.96042
cg37311990_TC11	cg37311990	Gm7160	Gm7160_Exon	0.000364911	0.0549102	6.70575	6.48207e-08	0.000213238	2.89387
cg38801381_TC21	cg38801381	Slc5a12	Slc5a12_Exon	-0.000527873	0.470731	-6.69876	6.62485e-08	0.000215541	2.87195
cg47417169_TC21	cg47417169	AU022751	AU022751_Exon	-0.000357343	0.748907	-6.68837	6.84285e-08	0.000216955	2.83938
cg42283357_TC21	cg42283357	Fryl	Fryl_Exon	-0.000196628	0.949461	-6.68263	6.96637e-08	0.000216955	2.82138
ctl-NP-P4HB-6633-CT-2_TC21				0.00029957	0.243732	6.68127	6.99599e-08	0.000216955	2.81711
cg32642220_TC11	cg32642220	Chmp7	Chmp7_Exon	0.000247024	0.0483606	6.67935	7.03809e-08	0.000216955	2.81108
cg37256546_TC21	cg37256546	Gal3st2c	Gal3st2c_threeUTR	-0.000624211	0.513236	-6.67618	7.10799e-08	0.000216955	2.80113
cg28761119_TC21	cg28761119	D10Wsu102e	D10Wsu102e_threeUTR	-0.000413263	0.797668	-6.66725	7.3087e-08	0.000220805	2.77312
cg40794525_BC21	cg40794525	Cntfr	Cntfr_Intron	-0.000275495	0.463055	-6.65724	7.54035e-08	0.000222531	2.74174
cg47255195_TC21	cg47255195	Map4	Map4_Exon	-0.000881021	0.713471	-6.65625	7.56373e-08	0.000222531	2.73862
cg31967622_BC21	cg31967622	1700024P04Rik	1700024P04Rik_Exon	-0.000839663	0.624979	-6.65137	7.67961e-08	0.000222531	2.72333
cg47557392_BC21	cg47557392	Sowahd	Sowahd_Promoter	-0.000410782	0.296457	-6.65063	7.6975e-08	0.000222531	2.72099
cg48223195_BC21	cg48223195	Gm3376	Gm3376_Intergenic_downstream	-0.000786703	0.646175	-6.6488	7.74163e-08	0.000222531	2.71524
cg42925465_BC11	cg42925465	Mcm7	Mcm7_fiveUTR	0.0003912	0.0693998	6.64356	7.86909e-08	0.000224019	2.69882
rs259517289_BC12	rs259517289	Slc10a2	Slc10a2_Intergenic_upstream	0.000935538	0.222432	6.63644	8.04585e-08	0.00022687	2.67648
cg36989081_BC11	cg36989081	Icos	Icos_Exon	-0.00048606	0.902777	-6.63096	8.1846e-08	0.000227774	2.65928
ctl-BS-EIF3C-CA-R-5224_TC21				-0.000630872	0.329095	-6.62666	8.29537e-08	0.000227774	2.64576
cg42027404_TC21	cg42027404	Lrpap1	Lrpap1_Intergenic_upstream	-0.000380006	0.646303	-6.62395	8.36571e-08	0.000227774	2.63727
cg44190593_TC21	cg44190593	Rdh13	Rdh13_Intron	-0.000415986	0.733417	-6.62248	8.4042e-08	0.000227774	2.63265
cg33230512_BC21	cg33230512	BC048602	BC048602_Promoter	-0.000535522	0.627994	-6.62016	8.46532e-08	0.000227774	2.62537
cg46093288_BC21	cg46093288	Ces4a	Ces4a_Intergenic_upstream	-0.000876959	0.632987	-6.61449	8.61645e-08	0.000227774	2.60757
cg34005163_TC21	cg34005163	Dgkg	Dgkg_Intron	-0.000627398	0.758589	-6.60113	8.98334e-08	0.000235371	2.56564
cg47498648_TC21	cg47498648	Mir221	Mir221_Intergenic_downstream	-0.00127571	0.622678	-6.59392	9.18801e-08	0.00023859	2.54299
cg44595629_TC21	cg44595629	Herc2	Herc2_Intron	-0.000376251	0.770904	-6.59116	9.26734e-08	0.00023859	2.53435
cg48107551_TC21	cg48107551	Wnk3	Wnk3_Exon	-0.000587994	0.322805	-6.57879	9.6326e-08	0.000243754	2.49549
cg36173273_TC21	cg36173273	Tle4	Tle4_Intron	-0.000403611	0.565685	-6.57299	9.80857e-08	0.000246104	2.47728
cg44940041_TC21	cg44940041	Olfr597	Olfr597_Promoter	-0.000415685	0.461059	-6.55768	1.0289e-07	0.000255988	2.42922
cg47159278_TC11	cg47159278	Stag1	Stag1_Intron	-0.000731765	0.516608	-6.55238	1.04608e-07	0.000258093	2.41257
cg45752674_BC21	cg45752674	Cbr4	Cbr4_Intergenic_upstream	-0.000473687	0.500942	-6.54072	1.0849e-07	0.00026546	2.37594
cg28438812_TC21	cg28438812	D030045P18Rik	D030045P18Rik_Exon	-0.000703678	0.344962	-6.53348	1.10974e-07	0.000269311	2.35319
cg29502957_BC21	cg29502957	Flt4	Flt4_Promoter	-0.000280964	0.755815	-6.52772	1.12989e-07	0.000271974	2.3351
cg48018489_TC21	cg48018489	Trmt2b	Trmt2b_Intron	-0.00023517	0.915904	-6.50894	1.19821e-07	0.000286092	2.2761
cg48250217_TC21	cg48250217	Gm20822	Gm20822_Intergenic_downstream	-0.000546567	0.598444	-6.50488	1.21354e-07	0.000287434	2.26333
cg46084209_BC11	cg46084209	Gm29682	Gm29682_Intron	-0.00117759	0.286616	-6.49914	1.23551e-07	0.000288563	2.2453
cg48223910_BC21	cg48223910	Gm3376	Gm3376_Intergenic_downstream	-0.000959921	0.254682	-6.49855	1.2378e-07	0.000288563	2.24344
cg28836279_TC21	cg28836279	Gm31592	Gm31592_Exon	-0.000895927	0.456242	-6.48212	1.30308e-07	0.000301409	2.19179
cg30894905_BC11	cg30894905	Elmsan1	Elmsan1_Promoter	0.000334676	0.0557238	6.4787	1.31708e-07	0.000302285	2.18106
cg36140985_BC21	cg36140985	Incenp	Incenp_Exon	-0.000644153	0.44426	-6.46968	1.35477e-07	0.000306574	2.15271
cg35197348_TC11	cg35197348	Lclat1	Lclat1_Intron	-0.000466129	0.702823	-6.46685	1.36683e-07	0.000306574	2.14381
cg38648271_BC21	cg38648271	Olfr1110	Olfr1110_Intergenic_downstream	-0.000602348	0.369063	-6.45625	1.41292e-07	0.000314528	2.11049
ctl-BS-RPS6KA5-CA-R-157839_BC21				-0.00053491	0.79594	-6.44875	1.44648e-07	0.000319596	2.08691
cg34721998_TC11	cg34721998	Cldn9	Cldn9_Intergenic_upstream	0.000381131	0.12829	6.44227	1.47611e-07	0.000321398	2.06654
cg37026915_BC21	cg37026915	Map2	Map2_Intergenic_upstream	-0.000844673	0.543519	-6.42938	1.53692e-07	0.000329736	2.02599
cg32136311_BC21	cg32136311	Nnt	Nnt_Intergenic_downstream	-0.000497645	0.62546	-6.42542	1.55605e-07	0.000331438	2.01356
cg48222816_BC21	cg48222816	Gm3376	Gm3376_Intergenic_downstream	-0.00116643	0.590676	-6.41937	1.58583e-07	0.000334052	1.99452
cg41903532_TC21	cg41903532	Phtf2	Phtf2_Intron	-0.000377216	0.746834	-6.41566	1.60436e-07	0.000334052	1.98286
cg47783229_BC21	cg47783229	Dmd	Dmd_Intergenic_upstream	-0.000592462	0.32407	-6.41229	1.62138e-07	0.000334052	1.97226
cg33846840_BC21	cg33846840	Mucl2	Mucl2_Intron	-0.000464803	0.729286	-6.40997	1.63321e-07	0.000334052	1.96496
cg48150488_BC21	cg48150488	Bclaf3	Bclaf3_Exon	-0.000436163	0.868739	-6.40818	1.6424e-07	0.000334052	1.95932
cg28713074_BC21	cg28713074	Sbno2	Sbno2_Exon	-0.000300574	0.856839	-6.4061	1.65313e-07	0.000334052	1.95278
cg32510931_TC21	cg32510931	Pck2	Pck2_threeUTR	-0.000310062	0.769526	-6.40511	1.65822e-07	0.000334052	1.94969
cg47496487_TC21	cg47496487	Kdm6a	Kdm6a_Intergenic_downstream	-0.000463899	0.413202	-6.40504	1.65858e-07	0.000334052	1.94947
cg35042412_BC21	cg35042412	1700025K24Rik	1700025K24Rik_Exon	-0.000644847	0.735208	-6.39452	1.71415e-07	0.000342912	1.91638
cg32890501_BC21	cg32890501	1700128A07Rik	1700128A07Rik_Exon	-0.00080196	0.273464	-6.38566	1.7624e-07	0.000350197	1.88851
cg32073216_TC11	cg32073216	Mier3	Mier3_fiveUTR	0.000190163	0.0363978	6.37857	1.80197e-07	0.000355673	1.86621
cg33807722_BC21	cg33807722	Pou6f1	Pou6f1_Promoter	-0.000317778	0.579155	-6.37179	1.84065e-07	0.000356484	1.84489
cg48226981_TC21	cg48226981	Gm3376	Gm3376_Intergenic_downstream	-0.000820392	0.330108	-6.37152	1.8422e-07	0.000356484	1.84404
cg45389608_BC21	cg45389608	Gm15348	Gm15348_Promoter	-0.000918374	0.588863	-6.36536	1.87812e-07	0.00036051	1.82466
cg36160655_BC21	cg36160655	Olfr1424	Olfr1424_Exon	-0.000610982	0.70187	-6.36379	1.88736e-07	0.00036051	1.81973
cg35049780_BC21	cg35049780	Hdgfl2	Hdgfl2_Promoter	0.00034477	0.19334	6.34281	2.01563e-07	0.000377492	1.75372
cg43549815_TC21	cg43549815	Reep1	Reep1_Intergenic_upstream	-0.000444284	0.661767	-6.34208	2.02025e-07	0.000377492	1.75142
cg36167785_TC11	cg36167785	Olfr1467	Olfr1467_Exon	-0.00101521	0.715517	-6.34131	2.0251e-07	0.000377492	1.74901
cg39870175_BC21	cg39870175	Ppm1l	Ppm1l_Intron	-0.000405794	0.582278	-6.34097	2.02727e-07	0.000377492	1.74794
cg36496916_BC11	cg36496916	Sorcs1	Sorcs1_Exon	-0.000518136	0.713785	-6.3311	2.09095e-07	0.000384479	1.71689
cg48222570_TC21	cg48222570	Gm3376	Gm3376_Exon	-0.000767221	0.367673	-6.32916	2.10375e-07	0.000384479	1.71077
cg34851202_TC21	cg34851202	Zfp81	Zfp81_Exon	-0.000542082	0.508562	-6.3125	2.21656e-07	0.000400156	1.65834
cg48220017_BC21	cg48220017	H2al2b	H2al2b_Intergenic_upstream	-0.000779566	0.701815	-6.30283	2.28472e-07	0.000407064	1.62794
cg44958870_TC21	cg44958870	Olfr1532-ps1	Olfr1532-ps1_Exon	-0.000395884	0.724507	-6.30058	2.30092e-07	0.000407064	1.62085
cg31242136_BC11	cg31242136	Adarb2	Adarb2_Intergenic_upstream	-0.000510575	0.731822	-6.29746	2.32358e-07	0.000407064	1.61102
cg41202989_TC21	cg41202989	B020004J07Rik	B020004J07Rik_Intron	-0.000653058	0.619251	-6.29625	2.33235e-07	0.000407064	1.60723
cg29054705_TC21	cg29054705	Dyrk2	Dyrk2_Exon	-0.000640969	0.575821	-6.29371	2.35107e-07	0.000407064	1.59922
cg33309383_BC21	cg33309383	Csmd3	Csmd3_Intergenic_downstream	-0.000247606	0.229944	-6.28601	2.4085e-07	0.000412188	1.575
cg29495221_TC21	cg29495221	Rack1	Rack1_Intergenic_upstream	-0.000785122	0.66574	-6.28	2.45434e-07	0.000417619	1.55608
cg46615668_TC11	cg46615668	Olfr887	Olfr887_fiveUTR	-0.000560769	0.840333	-6.24761	2.71678e-07	0.000459633	1.45415
cg30038921_BC21	cg30038921	Kat2a	Kat2a_Exon	-0.000416659	0.650816	-6.23599	2.81771e-07	0.000473818	1.41756
cg40873867_TC11	cg40873867	Baat	Baat_Promoter	-0.000536716	0.84858	-6.2343	2.83263e-07	0.000473818	1.41226
cg35380804_BC21	cg35380804	Lyzl1	Lyzl1_Intergenic_upstream	-0.000713602	0.807288	-6.22911	2.87915e-07	0.000478894	1.39592
cg36093451_BC21	cg36093451	Snx32	Snx32_Exon	-0.000832786	0.591851	-6.20622	3.09362e-07	0.000506599	1.32386
cg38981244_TC11	cg38981244	4921508D12Rik	4921508D12Rik_Promoter	-0.000330778	0.811394	-6.20385	3.11667e-07	0.000506599	1.31642
cg45191642_BC21	cg45191642	Fgfr2	Fgfr2_Intron	-0.000344364	0.795984	-6.20236	3.13127e-07	0.000506599	1.31173
cg38654247_TC21	cg38654247	Olfr1186	Olfr1186_Promoter	-0.000561594	0.610147	-6.18161	3.34208e-07	0.000530977	1.2464
cg31275818_TC21	cg31275818	Gpr137b-ps	Gpr137b-ps_Intron	-0.000535732	0.486655	-6.18045	3.35422e-07	0.000530977	1.24276
cg46885961_TC21	cg46885961	Trip4	Trip4_Exon	-0.000437006	0.855381	-6.17796	3.38058e-07	0.000530977	1.23491
cg36597845_BC21	cg36597845	Cacul1	Cacul1_Intron	-0.00046123	0.764529	-6.17711	3.38956e-07	0.000530977	1.23225
cg45991209_TC21	cg45991209	Aktip	Aktip_Exon	-0.000415758	0.611954	-6.17152	3.44961e-07	0.000535929	1.21464
cg47842857_TC21	cg47842857	Zc3h12b	Zc3h12b_Intron	-0.000365353	0.133855	-6.17041	3.46163e-07	0.000535929	1.21116
cg32484539_TC21	cg32484539	Olfr1507	Olfr1507_Exon	-0.000785673	0.485928	-6.16637	3.50585e-07	0.000535929	1.19843
cg32020247_TC21	cg32020247	Shisal2b	Shisal2b_Intergenic_upstream	-0.0004026	0.72492	-6.16372	3.53506e-07	0.000535929	1.19011
cg33915786_TC22	cg33915786	Snx29	Snx29_Intron	-0.000786614	0.717132	-6.16357	3.53678e-07	0.000535929	1.18962
cg45132563_TC21	cg45132563	Zfp764	Zfp764_threeUTR	-0.000478655	0.722887	-6.15799	3.59932e-07	0.00054094	1.17205
cg44163904_BC21	cg44163904	Gm15767	Gm15767_Promoter	-0.000468765	0.363547	-6.15554	3.62714e-07	0.000542367	1.16433
cg48214188_BC21	cg48214188	Uty	Uty_Intron	-0.000978339	0.343609	-6.1481	3.71283e-07	0.000549809	1.14092
cg45564408_BC21	cg45564408	Mir6395	Mir6395_Exon	-0.000456355	0.627185	-6.14799	3.71405e-07	0.000549809	1.14059
cg48125783_TC21	cg48125783	Samt4	Samt4_Intergenic_upstream	-0.000743391	0.636712	-6.13687	3.84606e-07	0.000560893	1.10558
cg36587503_BC21	cg36587503	Vax1	Vax1_Intergenic_upstream	-0.000615187	0.804073	-6.13671	3.84802e-07	0.000560893	1.10507
cg33823487_BC21	cg33823487	Krt6a	Krt6a_threeUTR	-0.000549057	0.607132	-6.13633	3.8526e-07	0.000560893	1.10388
cg44391051_BO21	cg44391051	Sdhaf1	Sdhaf1_fiveUTR	-0.000567493	0.548595	-6.13378	3.88365e-07	0.000560893	1.09583
cg30876440_TC21	cg30876440	Sipa1l1	Sipa1l1_Exon	-0.000652664	0.672962	-6.12853	3.94812e-07	0.000561734	1.07933
cg44013543_BC21	cg44013543	Klrk1	Klrk1_Exon	-0.000376889	0.879802	-6.12835	3.95044e-07	0.000561734	1.07874
cg28643114_BC21	cg28643114	Pcdh15	Pcdh15_Intron	-0.000709392	0.594214	-6.12782	3.95701e-07	0.000561734	1.07708
cg42209017_TC21	cg42209017	Pgm1	Pgm1_Intron	-0.000411662	0.801139	-6.12638	3.97488e-07	0.000561734	1.07256
cg32158784_BC21	cg32158784	Gm5797	Gm5797_Intergenic_downstream	0.000312765	0.374885	6.12563	3.98433e-07	0.000561734	1.07018
cg30983579_BC21	cg30983579	1700019M22Rik	1700019M22Rik_Intergenic_upstream	0.000563136	0.151062	6.12368	4.00871e-07	0.000562493	1.06406
cg31593769_BC21	cg31593769	4921525O09Rik	4921525O09Rik_Intergenic_upstream	-0.0002727	0.78179	-6.10076	4.30799e-07	0.000598811	0.991905
cg29237160_TC21	cg29237160	Upp1	Upp1_Exon	-0.000370219	0.659131	-6.08658	4.50415e-07	0.000623151	0.947286
cg29728430_TC21	cg29728430	6330403K07Rik	6330403K07Rik_Intron	-0.000361979	0.789192	-6.08244	4.56311e-07	0.000628372	0.934255
cg45168209_TC21	cg45168209	Fgfr2	Fgfr2_Intron	-0.000340736	0.891933	-6.07408	4.68463e-07	0.000640106	0.907921
cg29727497_TC21	cg29727497	Dhx33	Dhx33_Intron	-0.000425086	0.369916	-6.07281	4.70328e-07	0.000640106	0.903941
cg30934282_TC21	cg30934282	Gm8300	Gm8300_Intergenic_downstream	-0.00059009	0.574522	-6.07203	4.71492e-07	0.000640106	0.901464
cg45345845_TC21	cg45345845	Arglu1	Arglu1_Intergenic_upstream	-0.000310429	0.588978	-6.06921	4.75683e-07	0.000640106	0.892598
cg31707523_TC11	cg31707523	Cts3	Cts3_Intron	-0.00109593	0.451437	-6.06809	4.77354e-07	0.000640106	0.889084
cg48236035_TC21	cg48236035	Gm20826	Gm20826_Intergenic_downstream	-0.000546984	0.306641	-6.06731	4.78535e-07	0.000640106	0.886608
cg34849184_TC21	cg34849184	Zfp952	Zfp952_threeUTR	-0.000198269	0.354493	-6.06636	4.79966e-07	0.000640106	0.883616
cg30066950_BC21	cg30066950	Fzd2	Fzd2_Exon	0.000163034	0.126185	6.05017	5.05008e-07	0.000670484	0.832666
cg28248081_BC21	cg28248081	Ahi1	Ahi1_Promoter	-0.000461764	0.150334	-6.04359	5.15552e-07	0.000681426	0.811968
cg39284634_TC21	cg39284634	Snord12	Snord12_Exon	-0.000507514	0.719503	-6.0338	5.31665e-07	0.000693721	0.781142
ctl-NP-TBP-6606-TA-2_BO21				0.000347606	0.378205	6.03203	5.34633e-07	0.000693721	0.775567
cg36173272_TC21	cg36173272	Tle4	Tle4_Intron	-0.000510156	0.737073	-6.03169	5.3521e-07	0.000693721	0.774486
cg29616731_BC21	cg29616731	Llgl1	Llgl1_Promoter	-0.000456474	0.712409	-6.03088	5.3657e-07	0.000693721	0.771945
cg32418044_BC21	cg32418044	4930431P03Rik	4930431P03Rik_Intron	0.000314476	0.148155	6.02523	5.46178e-07	0.000702778	0.754169
cg31479720_TC21	cg31479720	Gcnt2	Gcnt2_Intron	-0.000359337	0.855152	-6.02398	5.48322e-07	0.000702778	0.750245
cg33750952_BC21	cg33750952	Slc38a2	Slc38a2_Exon	-0.000554687	0.553596	-6.01701	5.60472e-07	0.000715254	0.728295
cg32370400_BC21	cg32370400	Wapl	Wapl_Intron	-0.000331705	0.908847	-6.00839	5.7587e-07	0.00073175	0.701153
cg38657264_BC21	cg38657264	Olfr1232	Olfr1232_Exon	-0.000421944	0.314123	-6.00174	5.88027e-07	0.000744005	0.680233
cg43727810_TC21	cg43727810	Lrig1	Lrig1_Intron	-0.000488757	0.865919	-5.99384	6.02798e-07	0.000752072	0.655392
cg38995122_BO21	cg38995122	Hao1	Hao1_Intergenic_downstream	-0.000583596	0.536751	-5.99317	6.04071e-07	0.000752072	0.653279
cg37080550_TC21	cg37080550	6030407O03Rik	6030407O03Rik_Promoter	-0.000392718	0.52532	-5.99291	6.04564e-07	0.000752072	0.652462
cg38783455_BC21	cg38783455	Fshb	Fshb_Intron	-0.000339649	0.891256	-5.99056	6.09061e-07	0.000754497	0.645042
cg38710842_BC21	cg38710842	Lrrc4c	Lrrc4c_Intergenic_upstream	-0.000432641	0.504844	-5.98472	6.20329e-07	0.000762078	0.626688
cg36102634_BC21	cg36102634	Syvn1	Syvn1_Exon	-0.000733976	0.692348	-5.97881	6.31964e-07	0.000773163	0.608083
cg31015552_BC21	cg31015552	Nrde2	Nrde2_Promoter	-0.000392859	0.741804	-5.97587	6.37843e-07	0.000777145	0.598813
cg48219492_TC21	cg48219492	H2al2b	H2al2b_Intergenic_upstream	-0.000732233	0.281547	-5.96103	6.68293e-07	0.000805524	0.552126
cg35126148_BC21	cg35126148	Ankrd12	Ankrd12_Exon	-0.000492906	0.618225	-5.96055	6.69298e-07	0.000805524	0.550623
cg28914369_TC11	cg28914369	Gm4301	Gm4301_Intergenic_upstream	-0.000783924	0.406552	-5.95623	6.78446e-07	0.000808438	0.537033
cg43144728_TC11	cg43144728	Gm6578	Gm6578_Exon	-0.000818925	0.810809	-5.95555	6.7991e-07	0.000808438	0.534876
cg45268369_TC21	cg45268369	Ifitm6	Ifitm6_Intergenic_upstream	-0.000510874	0.517621	-5.94322	7.06765e-07	0.000837008	0.496101
cg43667268_BC21	cg43667268	Isy1	Isy1_Intron	-0.000422948	0.761724	-5.9378	7.18927e-07	0.000845984	0.479025
cg40658277_BC21	cg40658277	Cngb3	Cngb3_Intron	-0.000447184	0.797195	-5.93444	7.26556e-07	0.000846173	0.46846
cg38165221_TC21	cg38165221	Qsox2	Qsox2_Intron	-0.000314578	0.894753	-5.9332	7.29388e-07	0.000846173	0.464568
cg39505667_BC21	cg39505667	Slc7a12	Slc7a12_Intron	-0.000577208	0.624646	-5.93221	7.31652e-07	0.000846173	0.461465
cg39485085_TC21	cg39485085	Fabp12	Fabp12_Exon	-0.000399424	0.758911	-5.9258	7.46546e-07	0.000856906	0.441298
cg33793271_TC11	cg33793271	Aqp2	Aqp2_Promoter	-0.000486372	0.406313	-5.91508	7.72139e-07	0.000878827	0.407568
cg40547427_BC21	cg40547427	Cth	Cth_Intergenic_downstream	-0.000991092	0.31688	-5.91447	7.73621e-07	0.000878827	0.405648
rs257429108_TC11	rs257429108	Spertl	Spertl_Intergenic_downstream	0.000193291	0.0729147	5.91402	7.74729e-07	0.000878827	0.404216
cg45917197_TC21	cg45917197	Adgrl1	Adgrl1_fiveUTR	-0.000360297	0.809636	-5.9011	8.06829e-07	0.000911747	0.363594
cg46021188_BC21	cg46021188	Mt4	Mt4_Promoter	-0.000400354	0.553679	-5.89029	8.3472e-07	0.000939679	0.329591
cg38757390_TC21	cg38757390	Cd59b	Cd59b_Exon	-0.000332329	0.538517	-5.87335	8.80385e-07	0.000975326	0.276308
cg40935326_BC21	cg40935326	Txn1	Txn1_Intron	-0.000647102	0.786912	-5.87262	8.82421e-07	0.000975326	0.273997
cg45624245_BC21	cg45624245	Triml1	Triml1_Intergenic_downstream	-0.000757402	0.448958	-5.87231	8.83261e-07	0.000975326	0.273046
cg48196287_BC11	cg48196287	Tlr7	Tlr7_Intergenic_upstream	-0.000567878	0.800637	-5.87199	8.84165e-07	0.000975326	0.272023
cg28803371_TC21	cg28803371	Tyms-ps	Tyms-ps_Promoter	-0.00038057	0.70475	-5.87009	8.89445e-07	0.000975326	0.266067
cg41975210_TC11	cg41975210	Dnajb6	Dnajb6_Exon	-0.00017146	0.949631	-5.86664	8.99167e-07	0.00097585	0.255193
cg32796249_BC11	cg32796249	Pcdh9	Pcdh9_Exon	-0.000373729	0.905104	-5.86627	9.00206e-07	0.00097585	0.254038
cg39833264_BC21	cg39833264	Vmn2r6	Vmn2r6_Intergenic_upstream	-0.000469723	0.547187	-5.86613	9.00592e-07	0.00097585	0.253609
cg42645715_TC21	cg42645715	4930401G09Rik	4930401G09Rik_Intron	-0.000358154	0.557708	-5.86452	9.05175e-07	0.00097585	0.248532
cg46386439_BC11	cg46386439	Alkbh8	Alkbh8_Intron	-0.000492307	0.735849	-5.86409	9.06403e-07	0.00097585	0.247175
cg48031855_TC21	cg48031855	Bex3	Bex3_Exon	-0.000633498	0.680976	-5.86273	9.10274e-07	0.000976467	0.242913
cg28656335_BC11	cg28656335	Specc1l	Specc1l_Promoter	0.000240576	0.0476761	5.86121	9.14634e-07	0.000977602	0.238134
ctl-BS-RPS6KA6-CA-R-60909_BO21				-0.000911603	0.638059	-5.85714	9.26412e-07	0.000986629	0.225335
cg45270342_BC21	cg45270342	Rnh1	Rnh1_Exon	-0.000245035	0.837275	-5.85025	9.46711e-07	0.00100056	0.203658
cg28786150_TC21	cg28786150	Prdm4	Prdm4_threeUTR	-0.000302078	0.592051	-5.84868	9.51392e-07	0.00100056	0.198725
cg30584237_TC21	cg30584237	Lrrn3	Lrrn3_Intergenic_upstream	-0.000350289	0.801524	-5.84255	9.6989e-07	0.00101468	0.179467
cg43171232_TC21	cg43171232	Tfec	Tfec_Exon	-0.000638823	0.493062	-5.83931	9.79822e-07	0.00101699	0.169278
cg45807490_TC21	cg45807490	Tmem161a	Tmem161a_Intron	-0.000288987	0.8932	-5.83848	9.82401e-07	0.00101699	0.166649
cg47817228_BC21	cg47817228	LOC101055749	LOC101055749_Intergenic_upstream	-0.000278277	0.705921	-5.82924	1.01134e-06	0.00103995	0.137615
cg48111169_TC11	cg48111169	Huwe1	Huwe1_Intron	-0.000222679	0.929028	-5.82821	1.01463e-06	0.00103995	0.134366
cg40794525_BC11	cg40794525	Cntfr	Cntfr_Intron	-0.000273947	0.529701	-5.8277	1.01626e-06	0.00103995	0.132768
cg28261158_BC21	cg28261158	Raet1e	Raet1e_Exon	-0.000306664	0.751772	-5.82696	1.01863e-06	0.00103995	0.130433
cg39534552_TC11	cg39534552	Cp	Cp_Intron	-0.00057394	0.910713	-5.82563	1.0229e-06	0.00104014	0.126252
cg35017396_BC11	cg35017396	Btg3	Btg3_Promoter	-0.000485551	0.844931	-5.82472	1.02584e-06	0.00104014	0.123386
cg46971133_TC21	cg46971133	4933433G15Rik	4933433G15Rik_Promoter	-0.000519111	0.475594	-5.81978	1.04188e-06	0.00105268	0.107874
cg28708443_BC21	cg28708443	Ptbp1	Ptbp1_threeUTR	-0.000376811	0.451197	-5.81873	1.04532e-06	0.00105268	0.104577
cg38804858_BO11	cg38804858	Olfr1285	Olfr1285_Exon	-0.000398689	0.556137	-5.81494	1.05787e-06	0.0010617	0.0926468
cg28617803_TC21	cg28617803	Slc16a9	Slc16a9_Promoter	-0.000802313	0.689854	-5.81233	1.06658e-06	0.00106683	0.0844433
cg44921528_BC21	cg44921528	P2ry2	P2ry2_Exon	-0.000488002	0.59832	-5.80932	1.07671e-06	0.00107329	0.074989
cg47506819_BC21	cg47506819	Rbm10	Rbm10_Intron	-0.000312585	0.228432	-5.80824	1.08038e-06	0.00107329	0.0715914
cg47021703_BC11	cg47021703	Irak1bp1	Irak1bp1_Intergenic_upstream	-0.000286282	0.857113	-5.8072	1.08391e-06	0.00107329	0.0683281
cg43942360_TC21	cg43942360	Gm10319	Gm10319_Intergenic_upstream	-0.000553072	0.79714	-5.80609	1.08772e-06	0.00107347	0.0648218
cg31275385_TC21	cg31275385	Ero1lb	Ero1lb_Exon	-0.000575443	0.211441	-5.80442	1.09343e-06	0.00107552	0.0595852
cg32556637_BC21	cg32556637	Spata13	Spata13_Promoter	-0.000410346	0.672665	-5.79634	1.12156e-06	0.00109526	0.0341941
cg33976139_BC21	cg33976139	Olfr167	Olfr167_Promoter	-0.000673384	0.19909	-5.79548	1.1246e-06	0.00109526	0.0314889
cg28335736_TC21	cg28335736	Trdn	Trdn_Intron	-0.000546205	0.812142	-5.79437	1.12854e-06	0.0010955	0.0279947
cg33788364_TC21	cg33788364	Mcrs1	Mcrs1_Promoter	0.000299953	0.225799	5.79321	1.13265e-06	0.00109589	0.0243606
cg36161626_TC11	cg36161626	Olfr235	Olfr235_Promoter	-0.00124976	0.611108	-5.78955	1.14575e-06	0.00110467	0.0128669
cg29724059_BC21	cg29724059	Camta2	Camta2_Intron	-0.000455612	0.870001	-5.78759	1.15286e-06	0.00110467	0.00667897
cg48214247_BC21	cg48214247	Uty	Uty_Intron	-0.00092109	0.786855	-5.78721	1.15421e-06	0.00110467	0.00551212
cg31947466_TC11	cg31947466	Enc1	Enc1_Intergenic_upstream	-0.000412775	0.842623	-5.78654	1.15665e-06	0.00110467	0.00340218
cg45143765_BC11	cg45143765	Tgfb1i1	Tgfb1i1_threeUTR	-0.000336457	0.896657	-5.78491	1.16258e-06	0.00110677	-0.00171289
cg31603815_TC21	cg31603815	Auh	Auh_Intron	-0.000379795	0.637227	-5.78181	1.17398e-06	0.00111404	-0.0114663
cg32607175_TC21	cg32607175	Pbk	Pbk_Intron	-0.000292439	0.810006	-5.77809	1.18779e-06	0.00112355	-0.0231596
cg46903978_BC11	cg46903978	C2cd4a	C2cd4a_Exon	0.000204113	0.0401527	5.77351	1.20502e-06	0.00113293	-0.0375499
cg43295502_BC21	cg43295502	Akr1b10	Akr1b10_Promoter	-0.000619948	0.710923	-5.77342	1.20537e-06	0.00113293	-0.0378411
ctl-BS-RPS6KB1-CT-R-20229_TC21				-0.0003436	0.896271	-5.77094	1.21478e-06	0.00113817	-0.0456146
cg42913201_BC21	cg42913201	Muc3	Muc3_fiveUTR	-0.000288324	0.634106	-5.76839	1.22459e-06	0.00114374	-0.0536537
cg44777195_TC21	cg44777195	Crtc3	Crtc3_Intergenic_downstream	-0.000351374	0.208492	-5.76618	1.23312e-06	0.00114448	-0.0605883
cg48215087_BC11	cg48215087	Usp9y	Usp9y_Intron	-0.000884521	0.753082	-5.76196	1.24958e-06	0.00115253	-0.0738411
cg47998315_TC11	cg47998315	Diaph2	Diaph2_Intron	-0.000379516	0.86989	-5.75765	1.26662e-06	0.00115644	-0.0873785
cg33705071_BC21	cg33705071	Pdzrn4	Pdzrn4_Intergenic_downstream	-0.000187472	0.35191	-5.7564	1.27162e-06	0.00115644	-0.0913137
cg29318738_BC21	cg29318738	Tmem17	Tmem17_Intergenic_downstream	-0.000381835	0.816625	-5.75622	1.27232e-06	0.00115644	-0.0918659
cg32727817_BC21	cg32727817	Zfp957	Zfp957_Promoter	-0.000328779	0.854312	-5.75597	1.27334e-06	0.00115644	-0.0926668
cg28914409_BC21	cg28914409	Gm4301	Gm4301_Intergenic_upstream	-0.00134975	0.481089	-5.75421	1.28038e-06	0.00115927	-0.098172
cg38004967_BC21	cg38004967	Frmd4a	Frmd4a_Intron	-0.000296172	0.576664	-5.75257	1.28702e-06	0.00116174	-0.103345
cg35105966_TC21	cg35105966	Fer	Fer_Intron	-0.000367264	0.872726	-5.75149	1.29141e-06	0.00116215	-0.106742
cg47461015_BC21	cg47461015	Bcor	Bcor_Exon	-0.000556402	0.814146	-5.74859	1.3032e-06	0.00116921	-0.115828
cg43492583_TC21	cg43492583	Ccser1	Ccser1_Exon	-0.000334542	0.906172	-5.74489	1.31846e-06	0.00117933	-0.127461
cg37071600_TC21	cg37071600	Ankar	Ankar_Exon	-0.000422237	0.586979	-5.74194	1.33075e-06	0.00118673	-0.136727
cg43158053_BC21	cg43158053	Ppp1r3a	Ppp1r3a_Intergenic_downstream	-0.0007421	0.652682	-5.73938	1.34152e-06	0.00118898	-0.144784
cg44736924_BO21	cg44736924	Akap13	Akap13_Exon	-0.000367548	0.628642	-5.73654	1.35352e-06	0.00118898	-0.153681
cg44465651_TC21	cg44465651	Gm28453	Gm28453_Promoter	-0.000537242	0.658863	-5.73585	1.35649e-06	0.00118898	-0.155871
cg36454822_BC21	cg36454822	Ldb1	Ldb1_Exon	-0.000308099	0.795	-5.73503	1.35997e-06	0.00118898	-0.158432
cg39793976_BC21	cg39793976	Rnf13	Rnf13_Exon	-0.000658529	0.702827	-5.73472	1.36132e-06	0.00118898	-0.159421
cg28392055_TC11	cg28392055	Sesn1	Sesn1_Intron	-0.000830418	0.850655	-5.73467	1.3615e-06	0.00118898	-0.159553
cg39209225_TC11	cg39209225	Zhx3	Zhx3_Intron	-0.000190543	0.940755	-5.73438	1.36277e-06	0.00118898	-0.160487
cg45233968_BC21	cg45233968	9430038I01Rik	9430038I01Rik_Intron	-0.000194099	0.93242	-5.73376	1.3654e-06	0.00118898	-0.162412
cg46794116_TC21	cg46794116	1700017B05Rik	1700017B05Rik_Exon	-0.000360787	0.750927	-5.72957	1.3835e-06	0.00120121	-0.17557
cg48229815_TC11	cg48229815	Gm3376	Gm3376_Intergenic_downstream	-0.000693806	0.38147	-5.71775	1.43587e-06	0.00123941	-0.21269
cg29197559_TC21	cg29197559	Ap1b1	Ap1b1_Intron	-0.000472945	0.792166	-5.70929	1.47459e-06	0.00126545	-0.239265
cg46481989_BC21	cg46481989	Olfm2	Olfm2_Exon	0.000198184	0.107867	5.70635	1.48829e-06	0.00127352	-0.248505
cg44468917_BC21	cg44468917	Zfp939	Zfp939_Promoter	-0.000516305	0.594511	-5.6924	1.55499e-06	0.00131916	-0.292293
cg40797392_TC21	cg40797392	Gm21541	Gm21541_Promoter	-0.000358708	0.514034	-5.68867	1.57332e-06	0.00132931	-0.303996
cg30260076_BC21	cg30260076	Engase	Engase_Exon	0.000118984	0.0579417	5.68701	1.58154e-06	0.00132931	-0.3092
cg35625298_TC21	cg35625298	Ndfip1	Ndfip1_Exon	-0.00019832	0.92701	-5.68202	1.60654e-06	0.00134364	-0.324863
cg46917530_TC21	cg46917530	Rora	Rora_Intron	-0.000329982	0.888937	-5.67299	1.65278e-06	0.00137841	-0.353199
cg48163502_BC21	cg48163502	Rai2	Rai2_Exon	-0.000295184	0.882962	-5.6721	1.65743e-06	0.00137841	-0.356006
cg48024557_TC11	cg48024557	Zmat1	Zmat1_Intron	-0.000355457	0.899693	-5.67026	1.66707e-06	0.00138255	-0.361797
cg28933285_TC21	cg28933285	Gm20765	Gm20765_Intergenic_upstream	-0.00105747	0.455046	-5.668	1.67895e-06	0.00138689	-0.368889
cg31186067_TC21	cg31186067	Zfp386	Zfp386_Intergenic_upstream	-0.000286227	0.445759	-5.66748	1.68167e-06	0.00138689	-0.370507
cg42404576_BC11	cg42404576	Cxcl5	Cxcl5_Intergenic_upstream	-0.000445516	0.844491	-5.66646	1.68708e-06	0.00138749	-0.373713
cg34654537_TC11	cg34654537	Mrgprh	Mrgprh_Promoter	-0.000434336	0.860258	-5.66279	1.70665e-06	0.00139938	-0.385226
cg35434862_TC11	cg35434862	Tmem241	Tmem241_Intron	-0.000356771	0.451044	-5.66198	1.711e-06	0.00139938	-0.38777
cg47436037_TC11	cg47436037	Ssxb1	Ssxb1_Intron	-0.000421759	0.668986	-5.65819	1.73151e-06	0.00141225	-0.399665
cg31979669_TC21	cg31979669	Bdp1	Bdp1_Intron	-0.000335898	0.86	-5.6459	1.7997e-06	0.00146007	-0.438228
cg45656248_TC21	cg45656248	Primpol	Primpol_Intron	-0.000584475	0.666055	-5.64305	1.81589e-06	0.00146893	-0.447168
cg47712511_BC21	cg47712511	Fmr1	Fmr1_Intron	-0.000555653	0.834467	-5.63444	1.86566e-06	0.00150508	-0.474159
cg34566280_BC11	cg34566280	1700102H20Rik	1700102H20Rik_Intergenic_downstream	-0.000490393	0.85308	-5.62557	1.91839e-06	0.00154342	-0.501982
cg40505634_TC21	cg40505634	Usp33	Usp33_Intron	-0.000282084	0.825608	-5.62233	1.93804e-06	0.0015508	-0.512156
cg34182554_TC21	cg34182554	Gramd1c	Gramd1c_Intron	-0.000246838	0.663206	-5.62039	1.94985e-06	0.00155604	-0.518214
cg39794374_BC11	cg39794374	Rnf13	Rnf13_Intron	-0.000374676	0.875966	-5.61936	1.95619e-06	0.00155691	-0.521458
cg34886381_TC21	cg34886381	Dhx16	Dhx16_Intron	-0.000404033	0.824827	-5.61781	1.96576e-06	0.00156033	-0.526329
cg48250937_BC21	cg48250937	Gm20822	Gm20822_Intergenic_downstream	-0.000367343	0.567849	-5.61643	1.97429e-06	0.00156291	-0.530647
cg47910236_TC21	cg47910236	Cysltr1	Cysltr1_Intron	-0.00089867	0.781953	-5.61337	1.99334e-06	0.00157378	-0.540234
cg43397506_TC11	cg43397506	Fam221a	Fam221a_Intron	-0.000353179	0.903662	-5.61081	2.00943e-06	0.00157903	-0.548257
cg48341825_TC21	cg48341825	G530011O06Rik	G530011O06Rik_Intergenic_downstream	-0.00045114	0.544477	-5.61062	2.01066e-06	0.00157903	-0.548864
cg30033294_BC21	cg30033294	Eif1	Eif1_Intergenic_downstream	-0.000766085	0.536071	-5.60822	2.02587e-06	0.00158621	-0.55639
cg41672063_TC21	cg41672063	Zfp981	Zfp981_Intron	-0.000518099	0.656791	-5.60749	2.03052e-06	0.00158621	-0.558674
cg29476474_BC11	cg29476474	Clint1	Clint1_Promoter	-0.000732578	0.542774	-5.60432	2.05083e-06	0.00159787	-0.568608
cg30325811_TC21	cg30325811	Pfn4	Pfn4_Intergenic_downstream	-0.000615538	0.57893	-5.60321	2.05803e-06	0.00159926	-0.572103
cg35061117_TC21	cg35061117	Rfx2	Rfx2_Intron	-0.000340324	0.838512	-5.5997	2.08084e-06	0.00161276	-0.583104
cg44236477_TC21	cg44236477	Zfp606	Zfp606_threeUTR	-0.000302257	0.908914	-5.59612	2.10435e-06	0.00162209	-0.594314
cg31711182_TC21	cg31711182	Gm3604	Gm3604_Promoter	-0.000273224	0.894671	-5.59496	2.11203e-06	0.00162209	-0.597949
cg29274465_TC21	cg29274465	Egfr	Egfr_Exon	-0.000406593	0.493291	-5.59455	2.1148e-06	0.00162209	-0.599257
cg40911184_BC21	cg40911184	Gm12505	Gm12505_Exon	-0.000537261	0.834409	-5.59332	2.12294e-06	0.00162413	-0.603093
cg48080939_TC21	cg48080939	Trpc5	Trpc5_Intron	-0.000449991	0.817661	-5.59241	2.12905e-06	0.00162461	-0.60596
cg40796052_TC21	cg40796052	Il11ra1	Il11ra1_Exon	-0.000280142	0.792656	-5.58898	2.1521e-06	0.00163794	-0.616704
rs226357209_TC11	rs226357209	Sntb1	Sntb1_Intergenic_upstream	-0.000242814	0.911444	-5.58659	2.1683e-06	0.00164186	-0.624186
cg41675826_TC21	cg41675826	Zfp982	Zfp982_Promoter	-0.000391299	0.407102	-5.58507	2.1787e-06	0.00164553	-0.628961
cg43081924_TC21	cg43081924	Stard13	Stard13_Intron	-0.000621439	0.850698	-5.58388	2.18688e-06	0.0016475	-0.632699
cg47643231_TC21	cg47643231	Fam122c	Fam122c_Intron	-0.00104661	0.677428	-5.58299	2.193e-06	0.00164792	-0.635489
cg38084683_TC21	cg38084683	Cacnb2	Cacnb2_Intron	-0.000179973	0.947909	-5.58123	2.20513e-06	0.00165284	-0.640991
cg41041265_BC11	cg41041265	Ptprd	Ptprd_Intron	-0.00029646	0.920314	-5.57663	2.23721e-06	0.00167265	-0.655399
cg35739503_TC11	cg35739503	Redrum	Redrum_Exon	-0.000524744	0.720534	-5.56672	2.30795e-06	0.00172119	-0.686455
cg40797956_TO21	cg40797956	Fam205a2	Fam205a2_Exon	-0.000761401	0.712938	-5.56229	2.34027e-06	0.00174092	-0.70033
cg46158967_BC21	cg46158967	Hydin	Hydin_Exon	-0.000452812	0.835001	-5.56033	2.35478e-06	0.00174433	-0.706493
cg43956357_BC21	cg43956357	Vmn2r27	Vmn2r27_Intron	-0.000460145	0.757447	-5.55926	2.36266e-06	0.00174433	-0.709826
cg30523590_BC21	cg30523590	Ccdc71l	Ccdc71l_Intergenic_downstream	-0.000858018	0.458783	-5.55861	2.36746e-06	0.00174433	-0.711853
cg48224435_TC11	cg48224435	Gm3376	Gm3376_Intergenic_downstream	0.000779598	0.398106	5.55849	2.36843e-06	0.00174433	-0.712258
cg41703867_TC21	cg41703867	Ctnnbip1	Ctnnbip1_threeUTR	-0.000377482	0.905559	-5.55766	2.37459e-06	0.00174453	-0.714852
cg40747367_BC21	cg40747367	Akirin2	Akirin2_Exon	-0.000520341	0.569901	-5.55417	2.40075e-06	0.00175938	-0.725779
cg42981739_BC11	cg42981739	Fscn1	Fscn1_Exon	0.000152463	0.0237726	5.55234	2.41457e-06	0.00176514	-0.731506
cg40829798_TC11	cg40829798	Exosc3	Exosc3_Exon	0.000353051	0.0677587	5.55076	2.42663e-06	0.00176619	-0.736473
cg41318107_TC21	cg41318107	Ccdc163	Ccdc163_threeUTR	-0.000407391	0.73092	-5.55058	2.42794e-06	0.00176619	-0.737013
cg39654788_TC21	cg39654788	Adad1	Adad1_Exon	-0.000536845	0.784155	-5.54862	2.44293e-06	0.00177125	-0.74315
ctl-BS-RPS6KA5-CA-F-126373_TC21				-0.000167712	0.508206	-5.54585	2.4643e-06	0.00177953	-0.751839
cg31746721_BC21	cg31746721	Zfp729b	Zfp729b_fiveUTR	0.000235975	0.0859428	5.54451	2.47467e-06	0.00178129	-0.756025
cg35047770_TC21	cg35047770	Zfp119b	Zfp119b_fiveUTR	-0.000375348	0.522036	-5.54364	2.48145e-06	0.00178129	-0.758757
cg33790395_BC21	cg33790395	Tmbim6	Tmbim6_Promoter	-0.0003356	0.372612	-5.54262	2.48938e-06	0.00178129	-0.761937
cg38657418_BC11	cg38657418	Olfr1234	Olfr1234_fiveUTR	-0.000619083	0.805215	-5.54244	2.49081e-06	0.00178129	-0.762508
cg47839361_BC21	cg47839361	Arhgef9	Arhgef9_Intron	-0.000896765	0.43438	-5.53785	2.52698e-06	0.0018028	-0.776889
cg38656286_TC21	cg38656286	Olfr1218	Olfr1218_Exon	-0.000501288	0.541881	-5.53662	2.53675e-06	0.00180542	-0.780736
cg38061871_TC21	cg38061871	Prkcq	Prkcq_Intron	-0.000527395	0.532086	-5.53355	2.56137e-06	0.00181857	-0.790368
cg29251090_BC21	cg29251090	Ddc	Ddc_Intron	-0.000346989	0.843749	-5.52941	2.59483e-06	0.00183393	-0.803311
cg33543997_TC21	cg33543997	Triobp	Triobp_Exon	-0.00036669	0.57505	-5.52934	2.5954e-06	0.00183393	-0.803528
cg36971521_TC21	cg36971521	Casp8	Casp8_Intron	-0.000464586	0.754092	-5.52281	2.64916e-06	0.00185227	-0.823974
cg30234309_TC21	cg30234309	St6galnac1	St6galnac1_Intron	-0.000261154	0.598364	-5.52265	2.65055e-06	0.00185227	-0.824497
cg47240665_TC21	cg47240665	Ccdc36	Ccdc36_Promoter	-0.000855113	0.601907	-5.52245	2.65215e-06	0.00185227	-0.825099
cg33628583_BC11	cg33628583	7530416G11Rik	7530416G11Rik_Promoter	-0.000415534	0.769658	-5.5224	2.65262e-06	0.00185227	-0.825275
cg43411913_BC11	cg43411913	C530044C16Rik	C530044C16Rik_Intergenic_downstream	-0.000332602	0.811595	-5.51983	2.67409e-06	0.00186286	-0.833312
ctl-NP-RPS6KC1-83163-GC-1_BO21				-0.000257117	0.597327	-5.51737	2.69483e-06	0.00187291	-0.841017
cg46759321_BC21	cg46759321	4930550C14Rik	4930550C14Rik_Promoter	-0.00037356	0.873732	-5.51483	2.7164e-06	0.00187978	-0.848965
cg42164522_BC21	cg42164522	Gm10440	Gm10440_Intergenic_downstream	-0.000347031	0.161092	-5.51471	2.71742e-06	0.00187978	-0.84934
cg46003828_BC22	cg46003828	Crnde	Crnde_Intergenic_downstream	-0.000346624	0.892783	-5.51387	2.72456e-06	0.00188033	-0.851955
cg28110587_TC21	cg28110587	Iyd	Iyd_Intergenic_upstream	-0.000160039	0.4933	-5.51214	2.73939e-06	0.00188617	-0.857369
cg32274089_BC21	cg32274089	E330034G19Rik	E330034G19Rik_Intergenic_downstream	-0.000492837	0.486516	-5.50961	2.76125e-06	0.0018941	-0.865292
cg38661119_TC21	cg38661119	Olfr1565	Olfr1565_Exon	-0.000399835	0.684191	-5.50933	2.76371e-06	0.0018941	-0.866179
cg41845098_TC21	cg41845098	Crot	Crot_Promoter	-0.000437924	0.585614	-5.50661	2.78737e-06	0.0019059	-0.874679
cg29248008_TC21	cg29248008	Zpbp	Zpbp_Intron	-0.000429785	0.675321	-5.49521	2.88891e-06	0.00196943	-0.910351
cg46631915_BC21	cg46631915	Hspa8	Hspa8_fiveUTR	0.000126031	0.0492375	5.4947	2.89357e-06	0.00196943	-0.911958
cg30524521_BC11	cg30524521	Nampt	Nampt_Intergenic_upstream	-0.000540096	0.166382	-5.49022	2.93453e-06	0.00199272	-0.925969
cg33928431_BC11	cg33928431	Mir193b	Mir193b_Promoter	0.000415184	0.106273	5.48938	2.9423e-06	0.00199342	-0.928604
cg38644531_BC21	cg38644531	Olfr1043	Olfr1043_Exon	-0.000483202	0.604853	-5.48245	3.00699e-06	0.0020326	-0.950281
cg31769637_TC21	cg31769637	4930520P13Rik	4930520P13Rik_Exon	-0.00039942	0.784057	-5.47967	3.03339e-06	0.00204041	-0.958993
cg44514259_TC21	cg44514259	Fcgrt	Fcgrt_Promoter	-0.000307918	0.750016	-5.47839	3.0456e-06	0.00204041	-0.962997
cg29964988_BC21	cg29964988	Fam117a	Fam117a_Intron	-0.000341516	0.654202	-5.47833	3.04611e-06	0.00204041	-0.963164
cg48024614_TC21	cg48024614	Zmat1	Zmat1_Intron	-0.000421455	0.707676	-5.47623	3.06625e-06	0.00204926	-0.969732
cg30437104_TC21	cg30437104	1700030C10Rik	1700030C10Rik_Intergenic_downstream	-0.000357418	0.67775	-5.47372	3.09057e-06	0.00205624	-0.977608
cg32917319_TC21	cg32917319	Slitrk5	Slitrk5_Intergenic_downstream	-0.00077362	0.734411	-5.469	3.13664e-06	0.00208221	-0.992354
cg48334164_TC21	cg48334164	Gm20854	Gm20854_Intergenic_downstream	-0.000442763	0.839494	-5.46078	3.21864e-06	0.0021271	-1.01807
cg47643267_BC11	cg47643267	Fam122c	Fam122c_Intron	-0.000670457	0.606661	-5.45927	3.23385e-06	0.00213239	-1.02277
cg36735120_TC21	cg36735120	Lmbrd1	Lmbrd1_Exon	-0.00063171	0.780397	-5.45827	3.24407e-06	0.00213438	-1.02591
cg40523062_BC21	cg40523062	Msh4	Msh4_Intron	-0.000382325	0.851574	-5.45507	3.27679e-06	0.0021501	-1.03591
cg44772150_TC11	cg44772150	Cib1	Cib1_Intron	-0.000385346	0.446389	-5.45036	3.32561e-06	0.00217354	-1.05065
cg41884028_TC21	cg41884028	Speer4f1	Speer4f1_Intron	-0.000393255	0.859674	-5.44961	3.33337e-06	0.00217381	-1.05297
cg46868340_TC21	cg46868340	Map2k1	Map2k1_Exon	-0.000610362	0.772089	-5.44751	3.35547e-06	0.00218341	-1.05956
cg47144538_BC21	cg47144538	Faiml	Faiml_Intergenic_downstream	-0.000376261	0.325073	-5.44254	3.40819e-06	0.00221286	-1.07509
cg33766423_TC21	cg33766423	Hdac7	Hdac7_fiveUTR	-0.000343912	0.878557	-5.43736	3.46403e-06	0.00223488	-1.09128
cg44321957_TC21	cg44321957	Lypd10	Lypd10_Exon	-0.000505292	0.456093	-5.43735	3.46408e-06	0.00223488	-1.09129
cg47002425_BC21	cg47002425	Gm10635	Gm10635_Intergenic_downstream	-0.000363514	0.591737	-5.43228	3.5196e-06	0.00226532	-1.10713
cg37262554_BC21	cg37262554	Fam174a	Fam174a_Exon	-0.000497027	0.727886	-5.42989	3.54609e-06	0.00227742	-1.1146
ctl-BS-RPS6KB1-CA-F-31616_TO11				-0.000710473	0.578502	-5.42764	3.57127e-06	0.00228863	-1.12165
cg28760315_TC21	cg28760315	D10Wsu102e	D10Wsu102e_threeUTR	-0.000226887	0.935398	-5.42166	3.63887e-06	0.0023219	-1.14033
cg45133024_TC11	cg45133024	Zfp689	Zfp689_Exon	-0.000618785	0.684627	-5.41858	3.6742e-06	0.0023394	-1.14996
cg48222598_TC21	cg48222598	Gm3376	Gm3376_Intergenic_downstream	-0.00150119	0.60456	-5.41634	3.70012e-06	0.00234248	-1.15696
cg44200995_TC21	cg44200995	Vmn1r56	Vmn1r56_Exon	-0.000435916	0.343913	-5.41611	3.70277e-06	0.00234248	-1.15767
cg35582073_TC11	cg35582073	Wnt8a	Wnt8a_Promoter	-0.000349591	0.798083	-5.41209	3.74971e-06	0.00236711	-1.17022
cg41677854_TC21	cg41677854	Mfn2	Mfn2_Exon	-0.000316135	0.887497	-5.40636	3.81769e-06	0.0024049	-1.18811
cg48029357_TC11	cg48029357	Arxes2	Arxes2_Intergenic_upstream	-0.000400137	0.777404	-5.40199	3.87039e-06	0.00243292	-1.20177
cg36786825_TC21	cg36786825	Mir5103	Mir5103_Exon	-0.000342836	0.545516	-5.39826	3.91589e-06	0.00244831	-1.21341
cg33670527_BC21	cg33670527	Plxnb2	Plxnb2_Exon	-0.000522139	0.819091	-5.39766	3.92334e-06	0.00244831	-1.2153
cg30204420_BC21	cg30204420	Cd300lb	Cd300lb_Intron	-0.000345956	0.625761	-5.39761	3.92385e-06	0.00244831	-1.21543
cg44186978_TC11	cg44186978	Lilra6	Lilra6_Promoter	-0.000637659	0.58889	-5.39614	3.94198e-06	0.00244831	-1.22002
cg32727812_TC21	cg32727812	Zfp957	Zfp957_Promoter	-0.00031517	0.780884	-5.39539	3.95132e-06	0.00244831	-1.22238
cg47475335_BC21	cg47475335	Cask	Cask_Intron	-0.000485541	0.607308	-5.39527	3.95276e-06	0.00244831	-1.22274
cg48329417_BC21	cg48329417	Gm20736	Gm20736_Intergenic_downstream	-0.000205495	0.590739	-5.39362	3.9733e-06	0.0024559	-1.2279
cg38186134_BC21	cg38186134	Fcnb	Fcnb_Intergenic_downstream	-0.000811878	0.567771	-5.39103	4.00563e-06	0.00246877	-1.23597
cg29713727_TC11	cg29713727	Cldn7	Cldn7_Promoter	-0.000561622	0.701547	-5.39062	4.0108e-06	0.00246877	-1.23726
cg37827199_TC21	cg37827199	Desi2	Desi2_threeUTR	-0.000292847	0.902113	-5.38984	4.02067e-06	0.00246971	-1.2397
cg36168892_BC21	cg36168892	Olfr1489	Olfr1489_Promoter	-0.000334876	0.551638	-5.38871	4.03496e-06	0.00247336	-1.24324
cg28318177_TC11	cg28318177	Cenpw	Cenpw_Intergenic_downstream	-0.000436235	0.683227	-5.38437	4.09014e-06	0.00249907	-1.25676
cg32649573_BC21	cg32649573	Slc39a14	Slc39a14_Exon	-0.000199971	0.612093	-5.38366	4.09925e-06	0.00249907	-1.25898
cg33494466_BC21	cg33494466	Ly6g2	Ly6g2_Intergenic_downstream	-0.00061605	0.691005	-5.38318	4.10543e-06	0.00249907	-1.26048
cg34381500_BC21	cg34381500	1700041M19Rik	1700041M19Rik_Exon	-0.000573701	0.789199	-5.3812	4.13105e-06	0.00249907	-1.26667
cg46238838_BC21	cg46238838	Mphosph6	Mphosph6_Intron	-0.000579728	0.734515	-5.38082	4.1359e-06	0.00249907	-1.26784
cg46775648_BC21	cg46775648	Fbxo22	Fbxo22_Intron	-0.000207658	0.915718	-5.37943	4.15405e-06	0.00249907	-1.2722
cg46383473_TC21	cg46383473	2610044O15Rik8	2610044O15Rik8_Intergenic_downstream	-0.000553361	0.694852	-5.37783	4.17491e-06	0.00249907	-1.27719
cg39643095_TC21	cg39643095	Gm6639	Gm6639_Intron	-0.000542255	0.714198	-5.37716	4.1837e-06	0.00249907	-1.27928
cg47654903_BC21	cg47654903	1600025M17Rik	1600025M17Rik_Promoter	-0.000393252	0.836436	-5.37712	4.18415e-06	0.00249907	-1.27939
ctl-NP-RAB1A-13122-CC-2_BO21				-0.000128917	0.953906	-5.3764	4.19373e-06	0.00249907	-1.28166
cg47834624_BC21	cg47834624	Fam90a1b	Fam90a1b_Exon	-0.00084489	0.57228	-5.37633	4.1946e-06	0.00249907	-1.28187
cg34128605_BC21	cg34128605	Csta2	Csta2_Intron	-0.000408708	0.596739	-5.3761	4.19757e-06	0.00249907	-1.28258
cg37255571_BC21	cg37255571	D2hgdh	D2hgdh_Intron	-0.00045336	0.752623	-5.3753	4.20819e-06	0.00249907	-1.28509
cg28432178_TC21	cg28432178	Hace1	Hace1_Intron	-0.000685468	0.798977	-5.37491	4.21334e-06	0.00249907	-1.28631
rs257351463_TC21	rs257351463			-0.000620272	0.814431	-5.37471	4.21594e-06	0.00249907	-1.28692
cg36983492_BC21	cg36983492	Nbeal1	Nbeal1_Intergenic_upstream	-0.000415067	0.255634	-5.37437	4.22041e-06	0.00249907	-1.28798
cg29719870_TC21	cg29719870	Pelp1	Pelp1_Intergenic_downstream	-0.000399945	0.845323	-5.37278	4.24148e-06	0.00250654	-1.29294
cg47933799_TC21	cg47933799	4933403O08Rik	4933403O08Rik_Intergenic_downstream	-0.000366575	0.799939	-5.37026	4.2752e-06	0.00251161	-1.30082
cg48214126_TC21	cg48214126	Uty	Uty_Intron	-0.000179329	0.92721	-5.36746	4.31283e-06	0.0025241	-1.30955
cg30147267_BC21	cg30147267	Arsg	Arsg_Intron	-0.000301967	0.82288	-5.36739	4.31383e-06	0.0025241	-1.30977
cg48214211_TC21	cg48214211	Uty	Uty_threeUTR	-0.000644746	0.75947	-5.36486	4.34806e-06	0.00253911	-1.31764
cg48229956_BC11	cg48229956	Gm3376	Gm3376_Intergenic_downstream	-0.000687561	0.774252	-5.3615	4.39421e-06	0.00256065	-1.32815
cg35060975_BC21	cg35060975	Rfx2	Rfx2_Intron	-0.000497759	0.379615	-5.36025	4.41138e-06	0.00256065	-1.33204
cg43655951_BC21	cg43655951	Anxa4	Anxa4_Promoter	-0.000331167	0.840289	-5.35921	4.42582e-06	0.00256065	-1.33529
cg44499316_BC21	cg44499316	Klk1b24	Klk1b24_Promoter	-0.000305888	0.530705	-5.35891	4.43001e-06	0.00256065	-1.33623
cg40083975_TC21	cg40083975	Adam30	Adam30_Intergenic_downstream	-0.000571278	0.541981	-5.3579	4.44407e-06	0.00256065	-1.33938
cg44004326_BC21	cg44004326	Nrip2	Nrip2_Intron	-0.000330251	0.569594	-5.35717	4.45414e-06	0.00256065	-1.34164
cg42093416_BC21	cg42093416	Fbxl5	Fbxl5_Intron	-0.000639291	0.783316	-5.35586	4.4725e-06	0.00256623	-1.34573
cg43512642_BC11	cg43512642	Qrfprl	Qrfprl_Intron	-0.000310458	0.779385	-5.35226	4.52318e-06	0.00259029	-1.35695
cg45169067_TC11	cg45169067	Plekha1	Plekha1_Exon	-0.000149889	0.951461	-5.34973	4.55921e-06	0.00260496	-1.36485
cg28699781_TC21	cg28699781	Olfr57	Olfr57_Exon	-0.000504706	0.550675	-5.34399	4.64191e-06	0.00264174	-1.38274
cg40056831_BC21	cg40056831	Car14	Car14_Intron	-0.000326866	0.80426	-5.33932	4.71038e-06	0.00267165	-1.39731
cg30976069_TC11	cg30976069	Mir8099-1	Mir8099-1_Intergenic_downstream	-0.000270411	0.914659	-5.33819	4.72711e-06	0.00267498	-1.40084
cg48207581_BC21	cg48207581	Mid1	Mid1_fiveUTR	-0.000905561	0.767131	-5.33747	4.73783e-06	0.00267498	-1.4031
cg31371881_TC21	cg31371881	Prl	Prl_Intron	-0.00034823	0.885355	-5.33709	4.74335e-06	0.00267498	-1.40425
cg40007684_TC21	cg40007684	Pygo2	Pygo2_threeUTR	-0.000419043	0.641662	-5.33586	4.76173e-06	0.00268024	-1.4081
rs254962283_TC21	rs254962283			-0.00044644	0.855434	-5.33487	4.77653e-06	0.00268347	-1.41119
cg41421003_TC21	cg41421003	Ago4	Ago4_Intron	-0.000336658	0.245942	-5.33301	4.80438e-06	0.00268891	-1.41698
cg41998833_BC11	cg41998833	Fosl2	Fosl2_Promoter	0.000253266	0.0472572	5.33018	4.84722e-06	0.00270747	-1.42581
cg40644148_TC21	cg40644148	Ripk2	Ripk2_Intron	-0.000487128	0.859287	-5.32961	4.85583e-06	0.00270747	-1.42758
cg39125016_TC21	cg39125016	Ttll9	Ttll9_Intron	-0.000362234	0.453211	-5.32598	4.9114e-06	0.00272817	-1.4389
cg45849183_BC21	cg45849183	Hmgxb4	Hmgxb4_Promoter	-0.000206114	0.4291	-5.32494	4.92745e-06	0.00272934	-1.44215
cg41839166_TC21	cg41839166	Adam22	Adam22_Intron	-0.000202298	0.632609	-5.32465	4.93194e-06	0.00272934	-1.44305
cg34252394_BC21	cg34252394	Zpld1	Zpld1_Intergenic_upstream	-0.000415769	0.77163	-5.32278	4.96083e-06	0.00273979	-1.44887
cg39392571_BO21	cg39392571	Gm14308	Gm14308_Intron	-0.000494023	0.81618	-5.32224	4.96932e-06	0.00273979	-1.45057
cg42847649_BC21	cg42847649	Galnt17	Galnt17_Intron	-0.000320985	0.642186	-5.31834	5.03039e-06	0.0027683	-1.46272
cg33422784_BC21	cg33422784	Asap1	Asap1_Intron	-0.000332809	0.8087	-5.3155	5.07532e-06	0.00278785	-1.47157
cg45964069_TC21	cg45964069	Adcy7	Adcy7_Intron	-0.000360378	0.801227	-5.31087	5.14936e-06	0.00281539	-1.48598
cg33821068_BC21	cg33821068	Krt87	Krt87_Exon	-0.000232691	0.679702	-5.31079	5.15062e-06	0.00281539	-1.48622
cg40009761_TC21	cg40009761	Kcnn3	Kcnn3_Intron	-0.0002937	0.884422	-5.31029	5.15872e-06	0.00281539	-1.48779
cg35578768_TC21	cg35578768	Apc	Apc_Intron	-0.000300567	0.883185	-5.30798	5.19613e-06	0.00282279	-1.49497
cg36455796_BC21	cg36455796	Nolc1	Nolc1_Exon	-0.000370698	0.850123	-5.30464	5.25084e-06	0.00284171	-1.50539
rs236989564_BC21	rs236989564	Ldlrad4	Ldlrad4_Intron	-0.000357863	0.88662	-5.30352	5.26937e-06	0.00284171	-1.5089
cg34670621_TC11	cg34670621	Wdr27	Wdr27_Intron	-0.000407704	0.555957	-5.3023	5.28942e-06	0.00284357	-1.51268
cg48218465_TC21	cg48218465	Zfy2	Zfy2_Intergenic_upstream	-0.000462788	0.735123	-5.30215	5.29201e-06	0.00284357	-1.51316
cg44405584_BC21	cg44405584	Scgb2b7	Scgb2b7_Exon	-0.000478668	0.242781	-5.29757	5.36844e-06	0.00286901	-1.52743
cg37017877_BC21	cg37017877	Fzd5	Fzd5_threeUTR	-0.000602616	0.544563	-5.29474	5.41609e-06	0.00288926	-1.53622
cg42919578_TC11	cg42919578	Fbxo24	Fbxo24_Exon	-0.000258031	0.920069	-5.29199	5.4629e-06	0.00290899	-1.54478
cg32620685_BC11	cg32620685	Ebf2	Ebf2_Intron	-0.000441622	0.595762	-5.29012	5.49499e-06	0.00291392	-1.55061
cg33520773_TC21	cg33520773	Apol6	Apol6_Intergenic_downstream	-0.000345464	0.667118	-5.28924	5.51014e-06	0.00291392	-1.55334
cg28604521_BC21	cg28604521	Rhobtb1	Rhobtb1_Intron	-0.000503105	0.813215	-5.2892	5.51082e-06	0.00291392	-1.55347
cg30438081_TC21	cg30438081	1700030C10Rik	1700030C10Rik_Intron	-0.000463389	0.806854	-5.28803	5.53118e-06	0.00291392	-1.55713
cg36034385_TC21	cg36034385	Cndp1	Cndp1_Promoter	-0.000339735	0.56757	-5.28774	5.53613e-06	0.00291392	-1.55803
cg41384145_BC21	cg41384145	Macf1	Macf1_Promoter	-0.000169237	0.948123	-5.28724	5.54489e-06	0.00291392	-1.5596
ctl-BS-RPS6KA3-CT-R-89880_BC21				-0.000947553	0.755774	-5.28457	5.59138e-06	0.00291392	-1.5679
cg32610234_TC21	cg32610234	Ephx2	Ephx2_Intron	-0.000335899	0.68477	-5.28425	5.59689e-06	0.00291392	-1.56888
cg29172390_TC11	cg29172390	Olfr814	Olfr814_Promoter	-0.000561904	0.802585	-5.2842	5.59774e-06	0.00291392	-1.56903
cg40817474_TC21	cg40817474	Melk	Melk_Intergenic_upstream	-0.00043454	0.42029	-5.28399	5.60149e-06	0.00291392	-1.5697
cg42755486_BC11	cg42755486	Setd1b	Setd1b_Exon	0.000111621	0.0470092	5.28388	5.60343e-06	0.00291392	-1.57004
cg42848050_TC21	cg42848050	Galnt17	Galnt17_Intron	-0.000275485	0.358436	-5.28365	5.6074e-06	0.00291392	-1.57075
cg47426609_BC11	cg47426609	Cacna1f	Cacna1f_threeUTR	-0.000756577	0.761164	-5.28351	5.60995e-06	0.00291392	-1.5712
cg39325353_TC21	cg39325353	Tshz2	Tshz2_Intron	-0.000728717	0.570005	-5.28	5.67188e-06	0.00294093	-1.58212
cg28804023_BC21	cg28804023	Pmch	Pmch_Intergenic_upstream	-0.000325094	0.883507	-5.27811	5.70549e-06	0.00295319	-1.588
cg48214156_TC21	cg48214156	Uty	Uty_Intron	-0.000207486	0.910029	-5.27453	5.76984e-06	0.00298129	-1.59915
cg46500902_TC21	cg46500902	Prkcsh	Prkcsh_Exon	-0.000340603	0.779067	-5.27043	5.84439e-06	0.00301455	-1.61192
cg32341846_BC21	cg32341846	Ankrd28	Ankrd28_Intergenic_upstream	-0.000387331	0.81827	-5.26773	5.89384e-06	0.00303086	-1.6203
cg44930918_BC21	cg44930918	Numa1	Numa1_Intron	-0.000212005	0.889654	-5.26759	5.89649e-06	0.00303086	-1.62074
ctl-BS-CCND3-CT-R-59040_BC21				-0.000630745	0.846043	-5.26685	5.91016e-06	0.00303262	-1.62305
cg30292680_BC11	cg30292680	P4hb	P4hb_Promoter	0.000180446	0.0285452	5.26589	5.92804e-06	0.00303653	-1.62605
ctl-BS-RPS6KA6-CT-F-76946_BC21				-0.000744259	0.628614	-5.26267	5.98799e-06	0.00306194	-1.63606
cg43361528_BC21	cg43361528	Olfr237	Olfr237_Promoter	-0.000832035	0.725652	-5.26122	6.01531e-06	0.00306474	-1.64058
cg47372791_BC21	cg47372791	1700020M21Rik	1700020M21Rik_Exon	-0.000341651	0.601495	-5.26081	6.02301e-06	0.00306474	-1.64186
cg44153643_TC21	cg44153643	Itpr2	Itpr2_Intron	-0.000191118	0.911893	-5.26073	6.02452e-06	0.00306474	-1.6421
cg48223217_TC21	cg48223217	Gm3376	Gm3376_Intergenic_downstream	-0.000470739	0.747048	-5.25953	6.04712e-06	0.00307096	-1.64583
cg43009278_TC21	cg43009278	Kpna7	Kpna7_Exon	-0.000238732	0.409135	-5.25784	6.07925e-06	0.00308199	-1.6511
cg31713968_BC21	cg31713968	Gm5141	Gm5141_Exon	-0.000284497	0.857951	-5.25092	6.21219e-06	0.00313329	-1.6726
cg47916835_BC21	cg47916835	Gm732	Gm732_Intergenic_upstream	-0.000640202	0.79459	-5.24747	6.27965e-06	0.00316193	-1.68334
cg43929742_BC21	cg43929742	Atp6v1e1	Atp6v1e1_Intron	-0.000468611	0.857619	-5.24377	6.35277e-06	0.00318136	-1.69485
cg29752216_BC21	cg29752216	Olfr401	Olfr401_Exon	-0.00044444	0.624461	-5.24326	6.36283e-06	0.00318136	-1.69643
ctl-NP-CCND3-9621-TC-2_TC21				-0.000287024	0.847772	-5.24295	6.36906e-06	0.00318136	-1.6974
rs46462788_TC11	rs46462788			-0.000171918	0.932635	-5.2428	6.37197e-06	0.00318136	-1.69785
cg40077381_TC21	cg40077381	Chd1l	Chd1l_Promoter	-0.000741712	0.466145	-5.24193	6.38933e-06	0.00318263	-1.70056
cg31746322_BC11	cg31746322	Zfp748	Zfp748_Intron	-0.000436542	0.705026	-5.2416	6.396e-06	0.00318263	-1.7016
cg32218305_BC11	cg32218305	Rarb	Rarb_Exon	-0.000198261	0.963145	-5.24039	6.42032e-06	0.00318653	-1.70537
cg28930230_TC21	cg28930230	Slc6a15	Slc6a15_Exon	-0.000524339	0.422183	-5.24013	6.42537e-06	0.00318653	-1.70615
cg36446399_BC11	cg36446399	Btrc	Btrc_Exon	0.000270211	0.0623102	5.23819	6.46447e-06	0.00320056	-1.71218
cg42919379_TC21	cg42919379	Mospd3	Mospd3_Exon	0.000320445	0.225893	5.23708	6.48695e-06	0.00320324	-1.71563
rs231864851_BC11	rs231864851	Thsd7b	Thsd7b_Intergenic_upstream	0.000427486	0.345538	5.23633	6.50233e-06	0.00320324	-1.71799
cg34040771_TC21	cg34040771	Ccdc50	Ccdc50_Intron	-0.000264934	0.893347	-5.23463	6.53693e-06	0.00321493	-1.72326
cg38682559_TC21	cg38682559	Cry2	Cry2_Intron	-0.000267758	0.859678	-5.23322	6.56574e-06	0.00322375	-1.72763
cg42556933_BC21	cg42556933	Tmed5	Tmed5_Intron	-0.000385253	0.80428	-5.23212	6.58849e-06	0.00322956	-1.73107
cg48214210_TC11	cg48214210	Uty	Uty_threeUTR	-0.0004194	0.897554	-5.22886	6.65604e-06	0.00325728	-1.74121
cg47158767_TC11	cg47158767	Stag1	Stag1_fiveUTR	0.000143456	0.0274836	5.22571	6.72189e-06	0.00327867	-1.751
cg34885328_BC11	cg34885328	Tubb5	Tubb5_Exon	0.000448405	0.189462	5.22258	6.78797e-06	0.00329889	-1.76072
rs257429108_TC21	rs257429108	Spertl	Spertl_Intergenic_downstream	0.000353387	0.0902023	5.22216	6.79678e-06	0.00329889	-1.76201
cg39945631_TC21	cg39945631	1700028M03Rik	1700028M03Rik_Promoter	-0.000402056	0.677891	-5.21991	6.84493e-06	0.00331682	-1.76903
cg47620358_BC21	cg47620358	Igsf1	Igsf1_Intergenic_downstream	-0.000316394	0.876048	-5.21823	6.8809e-06	0.00332881	-1.77424
cg28359353_TC21	cg28359353	4930591E09Rik	4930591E09Rik_Intergenic_upstream	-0.000141757	0.705005	-5.21136	7.03035e-06	0.00339348	-1.79559
cg38396058_TC21	cg38396058	Rprm	Rprm_Intergenic_upstream	-0.000193681	0.916667	-5.21035	7.05251e-06	0.00339348	-1.79872
rs37115174_TC21	rs37115174	Mir7233	Mir7233_Intergenic_upstream	-0.000228807	0.886368	-5.21026	7.05441e-06	0.00339348	-1.79899
cg33981134_TC21	cg33981134	Parl	Parl_Intron	-0.000283295	0.882711	-5.20936	7.07434e-06	0.00339348	-1.80179
cg47813825_BC21	cg47813825	4930415L06Rik	4930415L06Rik_Intergenic_upstream	-0.000774208	0.743904	-5.20895	7.08336e-06	0.00339348	-1.80305
cg39825808_BC21	cg39825808	Mme	Mme_fiveUTR	-0.000675572	0.771744	-5.20726	7.12091e-06	0.00340596	-1.80831
cg37198117_BC21	cg37198117	Gm19589	Gm19589_Intron	-0.000811774	0.602388	-5.2063	7.14239e-06	0.00341013	-1.8113
cg34292466_TC11	cg34292466	Epha6	Epha6_Intergenic_upstream	-0.000432105	0.886882	-5.20461	7.18022e-06	0.00341013	-1.81655
cg28962118_BC21	cg28962118	Syt1	Syt1_Exon	-0.000306652	0.87889	-5.20409	7.19196e-06	0.00341013	-1.81818
cg43932955_TC21	cg43932955	Mical3	Mical3_Exon	-0.000320861	0.892022	-5.20394	7.19518e-06	0.00341013	-1.81862
cg35338442_BC21	cg35338442	Msh6	Msh6_Exon	-0.000246285	0.788451	-5.2036	7.20294e-06	0.00341013	-1.81969
cg33712476_TC21	cg33712476	Pphln1	Pphln1_threeUTR	-0.000551275	0.69465	-5.20288	7.21911e-06	0.00341013	-1.82192
cg34915124_TC21	cg34915124	Glyatl3	Glyatl3_Intron	-0.000570488	0.646686	-5.20276	7.22178e-06	0.00341013	-1.82229
cg37830407_TC21	cg37830407	Kif26b	Kif26b_Intron	-0.00033719	0.786494	-5.202	7.23905e-06	0.00341284	-1.82466
cg31732778_BC21	cg31732778	Nlrp4f	Nlrp4f_Exon	-0.000328434	0.402515	-5.2011	7.25927e-06	0.00341693	-1.82743
cg48150597_BC11	cg48150597	Bclaf3	Bclaf3_Intron	-0.000271144	0.918808	-5.2002	7.27974e-06	0.00341733	-1.83023
cg44225701_BC21	cg44225701	Vmn1r66	Vmn1r66_Intergenic_upstream	-0.000527721	0.767798	-5.20005	7.2832e-06	0.00341733	-1.8307
cg40796230_BC21	cg40796230	Ccl27a	Ccl27a_Promoter	-0.000282625	0.487152	-5.19824	7.32449e-06	0.00342862	-1.83632
cg40052138_TC21	cg40052138	Arnt	Arnt_Exon	-0.000312207	0.889698	-5.19798	7.33041e-06	0.00342862	-1.83712
cg46009293_TC21	cg46009293	Irx6	Irx6_Intergenic_downstream	-0.00045043	0.844537	-5.19415	7.41882e-06	0.00345904	-1.84904
cg48214295_BC11	cg48214295	Uty	Uty_Intron	-0.000634513	0.591111	-5.18998	7.51605e-06	0.00349886	-1.86197
cg31384130_BC21	cg31384130	A330102I10Rik	A330102I10Rik_Intergenic_downstream	-0.000564873	0.576264	-5.18765	7.57101e-06	0.0035124	-1.86921
cg33061486_BC21	cg33061486	Ugt3a1	Ugt3a1_Intron	-0.000377229	0.618943	-5.18724	7.58072e-06	0.0035124	-1.87048
cg38650716_TC21	cg38650716	Olfr1134	Olfr1134_Exon	-0.000492238	0.590824	-5.18482	7.63815e-06	0.00353308	-1.87798
cg31338240_TC21	cg31338240	Vmn1r195	Vmn1r195_Exon	-0.000763997	0.330244	-5.18436	7.64921e-06	0.00353308	-1.87942
cg29712335_TC21	cg29712335	Acap1	Acap1_Promoter	-0.000325284	0.781324	-5.18266	7.68997e-06	0.00354637	-1.8847
cg45543035_TC21	cg45543035	Nrg1	Nrg1_Intergenic_downstream	-0.000467248	0.607488	-5.18173	7.71233e-06	0.00355115	-1.88759
cg45826806_TC11	cg45826806	Bst2	Bst2_Intron	-0.000107628	0.961525	-5.17492	7.87803e-06	0.00361712	-1.9087
cg45838756_BC21	cg45838756	Sin3b	Sin3b_Intron	-0.000350292	0.865491	-5.17484	7.88003e-06	0.00361712	-1.90895
cg48183862_BC21	cg48183862	Fancb	Fancb_Intergenic_downstream	-0.00148059	0.49432	-5.1731	7.92296e-06	0.003631	-1.91435
cg41934217_BC11	cg41934217	Abcb8	Abcb8_Exon	-0.000314844	0.89404	-5.17263	7.93481e-06	0.003631	-1.91584
cg48014700_BC21	cg48014700	Pcdh19	Pcdh19_Intergenic_upstream	-0.000502052	0.807238	-5.17096	7.97627e-06	0.00363648	-1.92101
cg34299697_TC21	cg34299697	Arl13b	Arl13b_Intron	-0.000171525	0.927628	-5.17033	7.99182e-06	0.00363648	-1.92295
cg33192714_TC21	cg33192714	Ctnnd2	Ctnnd2_Exon	-0.000684528	0.345885	-5.1696	8.01023e-06	0.00363648	-1.92523
cg31087025_BC21	cg31087025	4933406K04Rik	4933406K04Rik_Exon	-0.000230696	0.382359	-5.16924	8.01916e-06	0.00363648	-1.92634
cg30958000_BC21	cg30958000	Gtf2a1	Gtf2a1_Intron	-0.000111932	0.941594	-5.16919	8.02047e-06	0.00363648	-1.9265
cg28832833_TC21	cg28832833	4930534H03Rik	4930534H03Rik_Exon	-0.000542035	0.780905	-5.15907	8.27793e-06	0.00374175	-1.95789
cg42714762_TC21	cg42714762	Lhx5	Lhx5_Intergenic_upstream	-0.000747735	0.424751	-5.15744	8.32032e-06	0.00374946	-1.96296
cg43057928_BC21	cg43057928	Hmgb1	Hmgb1_Exon	-0.000331848	0.59889	-5.15688	8.33485e-06	0.0037503	-1.96469
cg29344446_TC21	cg29344446	Vrk2	Vrk2_Promoter	-0.000412386	0.85305	-5.15286	8.43994e-06	0.00379182	-1.97713
cg34051637_BC21	cg34051637	Mb21d2	Mb21d2_Intergenic_upstream	-0.000370136	0.861263	-5.15087	8.49275e-06	0.00380977	-1.98333
cg34976069_TC11	cg34976069	Trerf1	Trerf1_Intergenic_upstream	-0.00018933	0.458058	-5.14333	8.69504e-06	0.00388838	-2.00671
ctl-BS-RPS6KA3-CT-F-23654_TC21				-0.000370161	0.874548	-5.14287	8.70739e-06	0.00388838	-2.00812
cg35909668_TC21	cg35909668	Mex3c	Mex3c_Exon	-0.000299753	0.296242	-5.1391	8.81034e-06	0.00392761	-2.01979
cg47613804_TC21	cg47613804	Zfp280c	Zfp280c_Exon	-0.000250851	0.904687	-5.13679	8.87429e-06	0.0039439	-2.02697
cg31812803_BC21	cg31812803	Arsk	Arsk_Intron	-0.000111956	0.956703	-5.13606	8.89433e-06	0.0039439	-2.02921
cg47549213_TC21	cg47549213	Dock11	Dock11_Intron	-0.000357929	0.845088	-5.13592	8.89833e-06	0.0039439	-2.02965
cg44249926_TC11	cg44249926	Obox7	Obox7_Intergenic_downstream	-0.000302937	0.853622	-5.13516	8.91939e-06	0.00394653	-2.032
cg29379657_BC21	cg29379657	Ubtd2	Ubtd2_Intron	-0.000589228	0.783237	-5.13386	8.95567e-06	0.00394653	-2.03603
cg36710476_TC21	cg36710476	Khdc1b	Khdc1b_Promoter	-0.000315279	0.847188	-5.13382	8.95679e-06	0.00394653	-2.03616
cg41357395_TC21	cg41357395	Hivep3	Hivep3_Intron	-0.000321883	0.792243	-5.13302	8.97931e-06	0.00394653	-2.03865
cg29174392_BC21	cg29174392	Tespa1	Tespa1_Intron	-0.00037075	0.646084	-5.13284	8.9843e-06	0.00394653	-2.0392
cg39990317_BC21	cg39990317	Mef2d	Mef2d_threeUTR	-0.000300896	0.772527	-5.13237	8.99755e-06	0.00394653	-2.04066
cg45657031_BC21	cg45657031	Gm16675	Gm16675_Intron	-0.000141031	0.946896	-5.13057	9.04826e-06	0.0039629	-2.04624
cg40845687_TC21	cg40845687	Coro2a	Coro2a_Intron	-0.000324005	0.741591	-5.12901	9.09244e-06	0.00397636	-2.05108
cg47269942_BC21	cg47269942	Lrrfip2	Lrrfip2_Intron	-0.000631309	0.83205	-5.12832	9.11192e-06	0.003979	-2.0532
cg37278728_BC11	cg37278728	Gm29461	Gm29461_Intergenic_downstream	-0.000663439	0.80927	-5.12707	9.14768e-06	0.00398652	-2.05709
cg48207830_TC21	cg48207830	Mid1	Mid1_Intron	-0.000391818	0.865769	-5.12677	9.15605e-06	0.00398652	-2.058
cg28735062_TC21	cg28735062	Eef2	Eef2_Exon	0.000234376	0.223597	5.12288	9.26793e-06	0.0040234	-2.07006
cg46050254_TC21	cg46050254	Got2	Got2_Intergenic_upstream	-0.000473174	0.812598	-5.11903	9.37986e-06	0.00406602	-2.08198
cg43095681_TC21	cg43095681	Sgce	Sgce_Intron	-0.000199279	0.915392	-5.11566	9.47908e-06	0.00409761	-2.09242
cg46307680_TC21	cg46307680	Galnt2	Galnt2_Intron	-0.000371227	0.757982	-5.11396	9.52943e-06	0.00409761	-2.09768
cg43476967_TC21	cg43476967	Vmn1r28	Vmn1r28_Promoter	-0.000847461	0.698397	-5.11373	9.53628e-06	0.00409761	-2.0984
cg31011916_TC21	cg31011916	Efcab11	Efcab11_Exon	-0.000301291	0.876987	-5.11359	9.54034e-06	0.00409761	-2.09882
cg33430557_TC21	cg33430557	Efr3a	Efr3a_Intron	-0.000196703	0.936133	-5.11337	9.54697e-06	0.00409761	-2.09951
cg29203349_TC11	cg29203349	Xbp1	Xbp1_Exon	-0.000439249	0.740577	-5.11305	9.55647e-06	0.00409761	-2.10049
cg28326462_TC21	cg28326462	Tpd52l1	Tpd52l1_Exon	-0.000455978	0.808511	-5.11244	9.57465e-06	0.00409761	-2.10238
cg34961524_TC21	cg34961524	Xpo5	Xpo5_Exon	-0.00024111	0.922575	-5.11213	9.58397e-06	0.00409761	-2.10335
cg37392944_TC11	cg37392944	Celrr	Celrr_Intergenic_downstream	0.00044514	0.203307	5.11184	9.59256e-06	0.00409761	-2.10424
cg28992791_BC21	cg28992791	Caps2	Caps2_Promoter	-0.000666622	0.730737	-5.11103	9.6169e-06	0.00409761	-2.10675
cg48213685_BC22	cg48213685	Eif2s3y	Eif2s3y_Intron	-0.000651602	0.753373	-5.11052	9.63213e-06	0.00409761	-2.10832
cg33031167_TC21	cg33031167	5430437J10Rik	5430437J10Rik_Intergenic_downstream	-0.000466352	0.543302	-5.11051	9.63264e-06	0.00409761	-2.10837
cg36911585_BC21	cg36911585	Tmeff2	Tmeff2_Exon	-0.000911972	0.667307	-5.10978	9.65452e-06	0.00410103	-2.11063
cg32023256_BC21	cg32023256	Rnf180	Rnf180_Intron	-0.000243889	0.754358	-5.10786	9.71261e-06	0.00411071	-2.11658
cg41616317_BC21	cg41616317	Rcc2	Rcc2_Exon	-0.000293564	0.81448	-5.10784	9.71308e-06	0.00411071	-2.11663
cg33493877_BC21	cg33493877	Ly6c2	Ly6c2_Intergenic_upstream	-0.000594124	0.62157	-5.10765	9.71898e-06	0.00411071	-2.11723
cg47892477_TC21	cg47892477	Ftx	Ftx_Promoter	-0.000498622	0.818889	-5.10604	9.76796e-06	0.00411794	-2.12222
cg36047127_TC11	cg36047127	Cbln2	Cbln2_Intergenic_downstream	-0.00105543	0.716399	-5.10584	9.77377e-06	0.00411794	-2.12281
cg39307035_TC21	cg39307035	Nfatc2	Nfatc2_Intron	-0.000271833	0.821999	-5.10571	9.7778e-06	0.00411794	-2.12322
ctl-BS-HK2-CT-R-21840_TC21				-0.000475612	0.803464	-5.10502	9.79901e-06	0.00412101	-2.12537
cg32465608_TC21	cg32465608	Olfr728	Olfr728_Exon	-0.000682186	0.744041	-5.09702	1.00464e-05	0.00420713	-2.15012
rs226357209_TC21	rs226357209	Sntb1	Sntb1_Intergenic_upstream	-0.000376031	0.885239	-5.09467	1.01205e-05	0.00422618	-2.15741
cg48078760_BC11	cg48078760	Mir680-2	Mir680-2_Intergenic_upstream	-0.000701018	0.721155	-5.09407	1.01394e-05	0.00422813	-2.15926
cg30694889_TC21	cg30694889	Sec23a	Sec23a_Intron	-0.000375893	0.862178	-5.09041	1.02557e-05	0.0042646	-2.17058
cg45900155_TC21	cg45900155	Inpp4b	Inpp4b_fiveUTR	-0.000736862	0.756753	-5.08876	1.03086e-05	0.00426689	-2.17568
cg35512598_BC21	cg35512598	Ino80c	Ino80c_Intergenic_downstream	-0.000194526	0.927373	-5.08812	1.03293e-05	0.00426689	-2.17768
cg42977562_BC21	cg42977562	Tnrc18	Tnrc18_Exon	-0.000406874	0.898388	-5.08811	1.03296e-05	0.00426689	-2.17771
cg28583229_BC11	cg28583229	Jmjd1c	Jmjd1c_Intron	-0.000170564	0.921281	-5.08802	1.03325e-05	0.00426689	-2.17798
cg41227395_BC21	cg41227395	Fyb2	Fyb2_Exon	-0.00062938	0.765259	-5.08799	1.03332e-05	0.00426689	-2.17806
cg41367735_TC21	cg41367735	Zmpste24	Zmpste24_Exon	-0.000479332	0.826123	-5.08729	1.03558e-05	0.00427026	-2.18022
cg44284327_TC11	cg44284327	Dmpk	Dmpk_Exon	-0.000316974	0.828945	-5.08667	1.03761e-05	0.00427268	-2.18216
cg47429272_BC21	cg47429272	Gripap1	Gripap1_Intron	-0.000429101	0.869298	-5.08485	1.04349e-05	0.00429094	-2.18777
cg34092672_TC21	cg34092672	Fyttd1	Fyttd1_Intron	-0.000327496	0.879226	-5.08392	1.04652e-05	0.00429225	-2.19064
cg35845519_BC21	cg35845519	Rax	Rax_Intergenic_downstream	-0.000558436	0.440595	-5.08386	1.04671e-05	0.00429225	-2.19083
cg48219757_BC21	cg48219757	H2al2b	H2al2b_Intergenic_upstream	-0.000477589	0.617364	-5.07995	1.05955e-05	0.00433681	-2.20292
cg34663299_TC21	cg34663299	Gm7168	Gm7168_Intergenic_downstream	-0.000334049	0.248716	-5.07966	1.06051e-05	0.00433681	-2.20382
cg47040565_TC21	cg47040565	Tent5a	Tent5a_Intergenic_upstream	-0.000411461	0.857099	-5.07913	1.06228e-05	0.00433808	-2.20548
cg33514064_BC11	cg33514064	Cpsf1	Cpsf1_Promoter	0.00014368	0.0479531	5.0786	1.06404e-05	0.00433925	-2.20712
cg48191011_TC21	cg48191011	Rab9	Rab9_Promoter	-0.000536604	0.799967	-5.07669	1.07039e-05	0.00435435	-2.21303
cg39278824_TC11	cg39278824	Prex1	Prex1_Intron	-0.000127957	0.967512	-5.0766	1.07068e-05	0.00435435	-2.21329
cg44202711_TC11	cg44202711	Vmn1r60	Vmn1r60_Promoter	-0.000144512	0.951056	-5.07421	1.07867e-05	0.00438084	-2.22067
cg47698415_BC21	cg47698415	Ctag2	Ctag2_Intergenic_downstream	-0.000494932	0.452331	-5.07276	1.08356e-05	0.00439463	-2.22516
cg30770627_BC21	cg30770627	Dact1	Dact1_Intron	-0.0003641	0.643572	-5.07233	1.08504e-05	0.00439463	-2.22651
cg47436578_BC21	cg47436578	Gm14459	Gm14459_Promoter	-0.000421458	0.377509	-5.0685	1.09804e-05	0.00443516	-2.23833
cg37292997_BC21	cg37292997	Gm20268	Gm20268_Intergenic_downstream	-0.000520591	0.67638	-5.06706	1.103e-05	0.00444912	-2.2428
cg35052318_TC21	cg35052318	A230051N06Rik	A230051N06Rik_Exon	-0.000325624	0.795346	-5.06616	1.10607e-05	0.00445545	-2.24556
cg48212710_BC21	cg48212710	Kdm5d	Kdm5d_Intergenic_upstream	-0.000311157	0.837576	-5.06524	1.10927e-05	0.00446226	-2.24843
cg48214237_TC21	cg48214237	Uty	Uty_Intron	-0.000707768	0.725089	-5.06164	1.12178e-05	0.00450646	-2.25955
cg38303428_BC21	cg38303428	Psmb7	Psmb7_Exon	-0.000218294	0.798784	-5.06089	1.12439e-05	0.00451081	-2.26185
cg34543179_BC21	cg34543179	1600002D24Rik	1600002D24Rik_Intron	-0.000251714	0.358154	-5.05976	1.12838e-05	0.0045157	-2.26537
cg39476384_TC21	cg39476384	C030034L19Rik	C030034L19Rik_Intergenic_upstream	-0.000516353	0.784183	-5.05968	1.12866e-05	0.0045157	-2.26561
cg38206949_TC11	cg38206949	Urm1	Urm1_Intron	9.86207e-05	0.0203678	5.05896	1.13117e-05	0.00451965	-2.26782
cg40265247_TC21	cg40265247	Bcar3	Bcar3_fiveUTR	-0.000354347	0.411129	-5.05845	1.133e-05	0.00452085	-2.26942
cg45287635_BC21	cg45287635	Th	Th_fiveUTR	-0.000348613	0.651993	-5.05799	1.1346e-05	0.00452114	-2.27082
cg48187470_BC21	cg48187470	Gemin8	Gemin8_Intergenic_upstream	-0.000282443	0.908541	-5.05656	1.13967e-05	0.00453525	-2.27524
cg45640959_TC21	cg45640959	Mtnr1a	Mtnr1a_Intron	-0.00039354	0.856259	-5.05505	1.14505e-05	0.00453589	-2.27992
cg31135953_TC21	cg31135953	Wdr20	Wdr20_Intron	-0.000442533	0.83694	-5.05501	1.14518e-05	0.00453589	-2.28003
cg47591374_BC21	cg47591374	Tex13c1	Tex13c1_Intergenic_downstream	-0.000362543	0.702455	-5.05485	1.14578e-05	0.00453589	-2.28054
rs48521828_BC21	rs48521828			-0.000190471	0.910993	-5.05252	1.15412e-05	0.00455599	-2.28774
cg48117025_TC21	cg48117025	Gpr143	Gpr143_Intron	-0.000564859	0.817228	-5.0507	1.16066e-05	0.0045757	-2.29334
cg38202970_TC21	cg38202970	Med27	Med27_Exon	-0.000303181	0.783196	-5.04982	1.16385e-05	0.00458219	-2.29607
cg30321250_BC11	cg30321250	Cenpo	Cenpo_Exon	-0.000244935	0.946528	-5.04925	1.16591e-05	0.00458423	-2.29783
cg39211233_TC21	cg39211233	Chd6	Chd6_Intron	-0.000447776	0.593841	-5.04741	1.17264e-05	0.00460456	-2.30353
cg48272580_TC11	cg48272580	Gm21379	Gm21379_Intergenic_upstream	-0.000451557	0.715689	-5.04506	1.18125e-05	0.00463224	-2.31079
cg39504245_TC11	cg39504245	Ralyl	Ralyl_Intron	-0.000257323	0.908731	-5.04391	1.18546e-05	0.00464258	-2.31431
cg40274990_TC21	cg40274990	Prss12	Prss12_Exon	-0.000479695	0.815115	-5.04333	1.18762e-05	0.00464489	-2.31612
cg41617813_TC11	cg41617813	Padi3	Padi3_fiveUTR	-0.0004696	0.642415	-5.0425	1.1907e-05	0.0046508	-2.31869
cg35513478_TC21	cg35513478	Galnt1	Galnt1_Intergenic_upstream	-0.000247405	0.544552	-5.04172	1.19358e-05	0.00465197	-2.32109
cg44859416_BC21	cg44859416	Gm15501	Gm15501_Exon	-0.000253412	0.887903	-5.04157	1.19414e-05	0.00465197	-2.32155
cg41881392_TC21	cg41881392	Hgf	Hgf_Exon	-0.000218203	0.899215	-5.04074	1.19725e-05	0.00465794	-2.32413
cg29073833_TC21	cg29073833	Hmga2	Hmga2_Intron	-0.000288502	0.829145	-5.03928	1.2027e-05	0.00467301	-2.32863
cg48140107_BC11	cg48140107	Mbtps2	Mbtps2_Promoter	0.000229621	0.124325	5.03859	1.20528e-05	0.00467336	-2.33076
cg36682477_BC11	cg36682477	Stau2	Stau2_Intron	-0.000420521	0.581532	-5.03822	1.20666e-05	0.00467336	-2.33189
cg28424414_BC21	cg28424414	Prdm1	Prdm1_Intron	-0.000530044	0.817593	-5.03781	1.20823e-05	0.00467336	-2.33318
cg46411796_BC21	cg46411796	Cep126	Cep126_Intron	-0.000228046	0.851577	-5.03514	1.2183e-05	0.00470275	-2.34141
cg47627419_BC21	cg47627419	Rap2c	Rap2c_Intergenic_upstream	-0.000314284	0.892436	-5.0342	1.22185e-05	0.00471034	-2.3443
cg30967650_TC11	cg30967650	4930559C10Rik	4930559C10Rik_Intergenic_downstream	-0.000850917	0.682056	-5.03221	1.22945e-05	0.00472602	-2.35045
cg29356119_TC21	cg29356119	Ppp4r3b	Ppp4r3b_Exon	-0.000329635	0.90206	-5.03162	1.23173e-05	0.00472602	-2.35229
cg46600632_TC11	cg46600632	Pate2	Pate2_Intron	-0.000239696	0.935162	-5.03147	1.23231e-05	0.00472602	-2.35275
cg33037985_BC21	cg33037985	Rictor	Rictor_Exon	-0.000323452	0.295119	-5.02915	1.24124e-05	0.00474734	-2.35991
cg46880580_TC21	cg46880580	Ubap1l	Ubap1l_Promoter	-0.000518586	0.766121	-5.02878	1.24268e-05	0.00474734	-2.36106
cg39720605_TC21	cg39720605	Gm7977	Gm7977_Intergenic_upstream	-0.000281646	0.28305	-5.02589	1.25388e-05	0.00477972	-2.36996
cg43144124_BC21	cg43144124	Phf14	Phf14_Exon	-0.000719049	0.817106	-5.02576	1.25438e-05	0.00477972	-2.37036
cg34005584_BC21	cg34005584	Dgkg	Dgkg_Intron	-0.000265655	0.767502	-5.02047	1.27524e-05	0.00485296	-2.38671
cg44947131_TC21	cg44947131	Olfr659	Olfr659_Intergenic_downstream	-0.000740928	0.618643	-5.01917	1.28041e-05	0.00486636	-2.39072
cg41296272_TC21	cg41296272	Skint5	Skint5_Intron	-0.000430456	0.700458	-5.01677	1.29e-05	0.00488052	-2.39812
cg41044792_TC11	cg41044792	Ptprd	Ptprd_Intron	-0.000735488	0.802578	-5.01556	1.29485e-05	0.00488052	-2.40184
cg30948433_TC11	cg30948433	Nrxn3	Nrxn3_Intron	-0.000539096	0.320178	-5.01545	1.29529e-05	0.00488052	-2.40217
cg44362450_TC11	cg44362450	Timm50	Timm50_Promoter	0.000391469	0.120845	5.01524	1.29613e-05	0.00488052	-2.40282
cg48163501_BC21	cg48163501	Rai2	Rai2_Exon	-0.000703607	0.799405	-5.01511	1.29668e-05	0.00488052	-2.40324
cg28214725_TC11	cg28214725	Gm20125	Gm20125_Intron	-0.000209702	0.848855	-5.01495	1.29732e-05	0.00488052	-2.40373
cg45730306_BC21	cg45730306	Galnt7	Galnt7_Intron	-0.000265212	0.867138	-5.0137	1.30236e-05	0.0048824	-2.40757
cg31428492_BC21	cg31428492	Eci2	Eci2_Intron	-0.000381858	0.877759	-5.0136	1.30276e-05	0.0048824	-2.40788
cg40796399_TO21	cg40796399	Ccl27a	Ccl27a_Intergenic_upstream	-0.000200894	0.80344	-5.01099	1.31341e-05	0.00491606	-2.41595
cg36134283_BC11	cg36134283	Eml3	Eml3_Exon	-0.000203772	0.957513	-5.00961	1.31905e-05	0.00493093	-2.42019
cg41993625_TC11	cg41993625	Gpn1	Gpn1_Exon	0.00016453	0.0432936	5.00508	1.33778e-05	0.00499467	-2.43418
cg47488443_TC21	cg47488443	Maoa	Maoa_Intron	-0.000456853	0.772058	-5.00387	1.3428e-05	0.0050071	-2.43789
cg36112587_BC21	cg36112587	Slc22a12	Slc22a12_Exon	-0.000495714	0.766369	-5.00219	1.34986e-05	0.00501768	-2.44309
cg48217635_BC21	cg48217635	Zfy2	Zfy2_Intergenic_downstream	-0.00060159	0.782758	-5.00188	1.35117e-05	0.00501768	-2.44404
cg43549291_TC11	cg43549291	Kdm3a	Kdm3a_Exon	0.000152201	0.0334674	5.00173	1.35179e-05	0.00501768	-2.4445
cg38644743_BC21	cg38644743	Olfr1046	Olfr1046_Intergenic_downstream	-0.00038885	0.557111	-5.00158	1.35242e-05	0.00501768	-2.44496
rs231783152_BC21	rs231783152	4933430H16Rik	4933430H16Rik_Promoter	0.000184845	0.0795228	4.99898	1.36339e-05	0.00503702	-2.45297
cg44521365_TC11	cg44521365	Tulp2	Tulp2_Exon	-0.000368413	0.816953	-4.99831	1.36627e-05	0.00503702	-2.45506
cg39144422_BC11	cg39144422	a	a_Intron	0.000119322	0.0503795	4.99816	1.36689e-05	0.00503702	-2.45551
cg43718834_TC11	cg43718834	Magi1	Magi1_Exon	-0.000556909	0.475899	-4.99763	1.36916e-05	0.00503702	-2.45715
cg32374756_TC21	cg32374756	Grid1	Grid1_Exon	-0.000586298	0.776011	-4.99754	1.36954e-05	0.00503702	-2.45743
cg47794887_TC21	cg47794887	Gk	Gk_Intergenic_downstream	-0.00062816	0.732153	-4.99512	1.37988e-05	0.00506246	-2.46489
cg42004978_BC21	cg42004978	Prr14l	Prr14l_Intron	-0.000974558	0.519989	-4.99413	1.38414e-05	0.00507129	-2.46794
cg40542608_TC21	cg40542608	Negr1	Negr1_Intron	-0.000575509	0.56385	-4.99376	1.38571e-05	0.00507129	-2.46907
cg35325341_TC21	cg35325341	Cript	Cript_Intron	-0.000431012	0.824618	-4.99233	1.3919e-05	0.00508765	-2.47348
cg47449372_BC21	cg47449372	Mid1ip1	Mid1ip1_Intergenic_upstream	-0.000506089	0.817011	-4.99091	1.39807e-05	0.0051039	-2.47787
ctl-BS-RPS6KB1-CA-R-15665_TC21				-0.000292576	0.91208	-4.98999	1.40207e-05	0.00511221	-2.4807
cg39825812_TC21	cg39825812	Mme	Mme_Intron	-0.000442455	0.847813	-4.98924	1.40535e-05	0.00511515	-2.48302
cg40154409_TC21	cg40154409	Cept1	Cept1_Intron	-0.000309073	0.912057	-4.98864	1.40798e-05	0.00511515	-2.48487
cg41800374_BC21	cg41800374	Ttll10	Ttll10_Exon	-0.000236998	0.854562	-4.98862	1.40806e-05	0.00511515	-2.48492
cg47838983_TC11	cg47838983	Arhgef9	Arhgef9_threeUTR	-0.000127232	0.94413	-4.98707	1.41486e-05	0.00513356	-2.4897
cg40372866_BC21	cg40372866	Nfkb1	Nfkb1_Intergenic_upstream	-0.000260439	0.878652	-4.98572	1.42081e-05	0.00514883	-2.49386
cg28455215_TC21	cg28455215	Ascc3	Ascc3_Intron	-0.000185381	0.596516	-4.98391	1.42884e-05	0.00517161	-2.49945
cg39791031_BC21	cg39791031	Tm4sf1	Tm4sf1_Exon	-0.000308181	0.758975	-4.98325	1.43177e-05	0.00517587	-2.50147
cg43138669_TC21	cg43138669	AA545190	AA545190_Intergenic_downstream	-0.000414631	0.856272	-4.98245	1.43531e-05	0.00518236	-2.50392
cg40948931_TC21	cg40948931	Susd1	Susd1_Intergenic_upstream	-0.000347	0.866422	-4.98085	1.44247e-05	0.00520186	-2.50885
cg35758379_BC21	cg35758379	Lmnb1	Lmnb1_Intron	-0.000320833	0.907967	-4.97971	1.44762e-05	0.00520876	-2.51238
cg47587628_TC21	cg47587628	Tenm1	Tenm1_Intron	-0.000728499	0.267412	-4.97943	1.44887e-05	0.00520876	-2.51324
cg29815963_BC21	cg29815963	Mir365-2	Mir365-2_Exon	-0.000280577	0.775071	-4.97892	1.45117e-05	0.00520876	-2.51481
cg38279988_BC21	cg38279988	Ggta1	Ggta1_Exon	-0.000305271	0.532619	-4.97813	1.45473e-05	0.00520876	-2.51724
cg38071578_BC21	cg38071578	Mindy3	Mindy3_Exon	-0.000396533	0.521532	-4.97798	1.45543e-05	0.00520876	-2.51772
cg45766591_TC11	cg45766591	Tll1	Tll1_fiveUTR	0.000229696	0.0463534	4.97785	1.45601e-05	0.00520876	-2.51811
cg46505531_TC21	cg46505531	Anln	Anln_Exon	-0.000302411	0.908773	-4.97563	1.4661e-05	0.00523603	-2.52495
cg34336354_BC21	cg34336354	Speer2	Speer2_Intron	-0.000374584	0.183137	-4.97496	1.46913e-05	0.00524054	-2.527
cg37255423_BC11	cg37255423	D2hgdh	D2hgdh_Intron	-0.000208159	0.923843	-4.9743	1.47218e-05	0.00524509	-2.52905
cg42742940_BC21	cg42742940	Pptc7	Pptc7_Intron	-0.000269243	0.107563	-4.97169	1.48414e-05	0.00527518	-2.53707
cg47795277_BC21	cg47795277	Gk	Gk_Intron	-0.000534245	0.752754	-4.97168	1.48419e-05	0.00527518	-2.5371
cg45728125_TC21	cg45728125	Scrg1	Scrg1_Intergenic_upstream	-0.000491234	0.773881	-4.97027	1.49072e-05	0.00528781	-2.54145
cg43351218_TC21	cg43351218	Try10	Try10_Intergenic_upstream	-0.000677016	0.654342	-4.97014	1.49131e-05	0.00528781	-2.54185
cg30310317_BC21	cg30310317	Rab10os	Rab10os_Intergenic_upstream	-0.000388018	0.675328	-4.96878	1.49762e-05	0.00530384	-2.54603
cg42834582_TC11	cg42834582	Phkg1	Phkg1_fiveUTR	0.000296762	0.0777329	4.96679	1.5069e-05	0.00532422	-2.55215
cg46137455_BC21	cg46137455	Zfhx3	Zfhx3_Exon	-0.000359061	0.823381	-4.96678	1.50697e-05	0.00532422	-2.5522
cg29173718_TC11	cg29173718	Olfr826	Olfr826_Promoter	0.000634235	0.221657	4.96543	1.51332e-05	0.00533894	-2.55636
cg45218347_BC21	cg45218347	Mki67	Mki67_Intergenic_upstream	-0.000468425	0.780038	-4.96432	1.51853e-05	0.00534593	-2.55977
cg47906231_TC21	cg47906231	Magt1	Magt1_Intron	-0.000625522	0.713919	-4.96369	1.52151e-05	0.0053469	-2.56171
cg33001649_BC21	cg33001649	Zic5	Zic5_Intron	-0.000389837	0.531152	-4.96324	1.52362e-05	0.0053469	-2.56308
cg31246301_BC11	cg31246301	Adarb2	Adarb2_Intron	-0.000511222	0.769532	-4.96311	1.52423e-05	0.0053469	-2.56348
cg40799055_BO21	cg40799055	Ccl27b	Ccl27b_Intron	-0.000186427	0.255809	-4.96165	1.53118e-05	0.00536029	-2.56799
cg36612972_TC21	cg36612972	Lypla1	Lypla1_Intron	-0.000318052	0.82626	-4.96155	1.53167e-05	0.00536029	-2.5683
cg47893651_BC11	cg47893651	Slc16a2	Slc16a2_Intron	-0.000697515	0.670738	-4.96028	1.5377e-05	0.00537506	-2.5722
cg28960757_BC21	cg28960757	Pawr	Pawr_Intron	-0.000259432	0.9027	-4.95967	1.54064e-05	0.00537898	-2.57409
cg38508558_BC21	cg38508558	Ubr3	Ubr3_Exon	-0.000185475	0.923579	-4.95712	1.55291e-05	0.00541543	-2.58195
cg39547141_TC21	cg39547141	Tbl1xr1	Tbl1xr1_Intron	-0.000310531	0.891858	-4.95329	1.57147e-05	0.00545602	-2.59372
cg47884839_BC11	cg47884839	Phka1	Phka1_Intron	-0.000422827	0.858034	-4.95319	1.57196e-05	0.00545602	-2.59402
cg46372416_BC21	cg46372416	Pard3	Pard3_Intron	-0.00070611	0.823098	-4.95282	1.57376e-05	0.00545602	-2.59516
cg44109828_TC21	cg44109828	Slco1a5	Slco1a5_Intron	-0.000621447	0.761871	-4.95226	1.57651e-05	0.00545915	-2.59689
cg36224053_BC21	cg36224053	Cemip2	Cemip2_Intergenic_upstream	-0.000522279	0.441396	-4.95008	1.58725e-05	0.0054899	-2.60361
cg33340391_TC21	cg33340391	Ext1	Ext1_Intron	-0.000295047	0.843885	-4.94763	1.59935e-05	0.00552532	-2.61114
cg37280039_TC11	cg37280039	Slco6d1	Slco6d1_Intergenic_downstream	-0.000347494	0.887527	-4.94564	1.60928e-05	0.00555313	-2.61727
cg43307490_BC21	cg43307490	Mtpn	Mtpn_Intergenic_upstream	-0.000698365	0.686916	-4.94326	1.6212e-05	0.00558125	-2.62458
cg48215654_BC21	cg48215654	Usp9y	Usp9y_Promoter	-0.000495074	0.872482	-4.94168	1.62917e-05	0.0055892	-2.62944
cg30314989_BC21	cg30314989	Dtnb	Dtnb_Intron	-0.000252905	0.637461	-4.94018	1.63679e-05	0.00560374	-2.63406
cg45052253_BC21	cg45052253	Vps35l	Vps35l_Exon	-0.000182399	0.800594	-4.9401	1.63719e-05	0.00560374	-2.6343
cg48220040_TC11	cg48220040	H2al2b	H2al2b_Intergenic_upstream	-0.000609462	0.729005	-4.9394	1.64078e-05	0.00560953	-2.63647
cg48215242_BC21	cg48215242	Usp9y	Usp9y_Intron	-0.000852553	0.709468	-4.93786	1.64863e-05	0.00562337	-2.64119
cg48203717_TC21	cg48203717	Arhgap6	Arhgap6_Intron	-0.000393403	0.727358	-4.93527	1.66193e-05	0.00566198	-2.64915
cg47867173_TC21	cg47867173	Awat2	Awat2_fiveUTR	-0.000426892	0.391188	-4.93454	1.66568e-05	0.00566198	-2.65139
cg40677369_BC11	cg40677369	Gm30731	Gm30731_Intergenic_downstream	-0.000444355	0.456917	-4.93311	1.67311e-05	0.00567953	-2.6558
cg28346050_BC21	cg28346050	Frk	Frk_Intergenic_downstream	-0.000336975	0.513309	-4.93258	1.67585e-05	0.00567953	-2.65742
cg35383260_BC21	cg35383260	Map3k8	Map3k8_Intergenic_downstream	-0.000222658	0.659991	-4.93244	1.6766e-05	0.00567953	-2.65786
cg48132882_TC21	cg48132882	Ptchd1	Ptchd1_Intron	-0.000372274	0.841021	-4.93129	1.68257e-05	0.00568405	-2.66138
cg47252792_BC21	cg47252792	Fbxw24	Fbxw24_Intron	-0.000532255	0.72429	-4.93108	1.68369e-05	0.00568405	-2.66204
ctl-NP-TBP-6606-TA-2_BC21				0.000164849	0.0935458	4.92878	1.69577e-05	0.0057183	-2.66912
cg47702473_TC21	cg47702473	Slitrk2	Slitrk2_Intergenic_upstream	-0.000688621	0.759119	-4.92824	1.69858e-05	0.00572124	-2.67075
cg33671039_TC11	cg33671039	Plxnb2	Plxnb2_Promoter	0.000249532	0.100938	4.92705	1.7049e-05	0.0057295	-2.67443
cg29957621_BC21	cg29957621	Tmem92	Tmem92_Intergenic_upstream	-0.000251598	0.894522	-4.92485	1.71655e-05	0.00576212	-2.68118
cg41523328_BC21	cg41523328	Stmn1	Stmn1_Promoter	-0.000520083	0.687482	-4.9241	1.72055e-05	0.00576901	-2.68348
cg41976826_TC21	cg41976826	Tyms	Tyms_fiveUTR	0.000210316	0.162245	4.92333	1.72469e-05	0.00577303	-2.68586
cg30466621_TC21	cg30466621	Kidins220	Kidins220_Exon	-0.000337815	0.855038	-4.92315	1.72565e-05	0.00577303	-2.68641
cg31578215_TC21	cg31578215	Fbxw17	Fbxw17_Intron	-0.000572623	0.662336	-4.9221	1.73129e-05	0.00578535	-2.68964
cg40388946_BC21	cg40388946	Dapp1	Dapp1_Intron	-0.000286736	0.815835	-4.92078	1.7384e-05	0.00578908	-2.6937
cg36788795_BC21	cg36788795	Prss40	Prss40_Intron	-0.000316966	0.445955	-4.92052	1.73981e-05	0.00578908	-2.6945
cg30743249_BC11	cg30743249	Rps29	Rps29_Intergenic_downstream	-0.0001921	0.569656	-4.9203	1.74097e-05	0.00578908	-2.69517
cg44111111_BC11	cg44111111	Spx	Spx_threeUTR	-0.000363368	0.757438	-4.92028	1.74108e-05	0.00578908	-2.69523
cg41215518_TC21	cg41215518	Gm12718	Gm12718_Intron	-0.000154227	0.931121	-4.92008	1.74218e-05	0.00578908	-2.69585
cg38474982_BC21	cg38474982	Scn2a	Scn2a_Promoter	0.000251442	0.0953534	4.91951	1.74523e-05	0.00579273	-2.69759
cg31255923_TC21	cg31255923	Zmynd11	Zmynd11_Exon	-0.000435336	0.859657	-4.9188	1.74913e-05	0.00579915	-2.69979
cg40343409_BC21	cg40343409	Papss1	Papss1_Intron	-0.000270667	0.815598	-4.91789	1.75405e-05	0.00580897	-2.70258
cg38765064_TC21	cg38765064	Ccdc73	Ccdc73_fiveUTR	-0.000369028	0.47195	-4.91719	1.75785e-05	0.00581503	-2.70472
cg42554243_TC21	cg42554243	Evi5	Evi5_Exon	-0.000418632	0.829798	-4.91568	1.76615e-05	0.00582946	-2.70938
cg48219753_TC11	cg48219753	H2al2b	H2al2b_Intergenic_upstream	-0.000410048	0.878413	-4.9138	1.77647e-05	0.00585048	-2.71515
cg38647890_TC21	cg38647890	Olfr1104	Olfr1104_Promoter	-0.000611068	0.737668	-4.91119	1.79093e-05	0.00589155	-2.72318
cg36898965_BC11	cg36898965	Mir6350	Mir6350_Intergenic_upstream	-0.000208425	0.933897	-4.90873	1.80463e-05	0.00592151	-2.73072
cg44177284_TC21	cg44177284	Amn1	Amn1_Exon	-0.000315312	0.564844	-4.90848	1.80603e-05	0.00592151	-2.73149
ctl-BS-ARF4-CT-F-12164_BO21				0.000587977	0.157132	4.90729	1.8127e-05	0.0059368	-2.73514
cg38391030_TC21	cg38391030	Prpf40a	Prpf40a_Intron	-0.000308419	0.873563	-4.90516	1.82472e-05	0.00595966	-2.74169
cg29062608_TC21	cg29062608	Grip1	Grip1_Intron	-0.000200893	0.914949	-4.90498	1.82572e-05	0.00595966	-2.74223
cg44504727_BC21	cg44504727	Nr1h2	Nr1h2_Exon	-0.000285372	0.759794	-4.90403	1.83111e-05	0.00595991	-2.74514
cg35419173_TC21	cg35419173	Thoc1	Thoc1_Intron	-0.000295313	0.892873	-4.90402	1.83117e-05	0.00595991	-2.74518
cg44996508_TC21	cg44996508	Usp47	Usp47_Intron	-0.000569648	0.824186	-4.9039	1.83184e-05	0.00595991	-2.74554
cg44306098_BC11	cg44306098	Vmn1r124	Vmn1r124_Promoter	-0.00047046	0.857421	-4.90191	1.84322e-05	0.00597423	-2.75167
cg38648053_BC21	cg38648053	Olfr1107	Olfr1107_fiveUTR	-0.000186418	0.926835	-4.90184	1.84358e-05	0.00597423	-2.75186
cg36438562_TC11	cg36438562	Pax2	Pax2_threeUTR	0.000136694	0.0293343	4.9017	1.84443e-05	0.00597423	-2.75232
cg40006737_TC21	cg40006737	Zbtb7b	Zbtb7b_Intron	-0.000311812	0.842515	-4.90136	1.84633e-05	0.00597423	-2.75334
cg41838307_BC11	cg41838307	Sri	Sri_Intron	-0.000582072	0.697512	-4.90074	1.84992e-05	0.00597932	-2.75526
ctl-BS-RPS6KA1-CA-F-10776_TC21				-0.000129891	0.957388	-4.89973	1.85573e-05	0.00599156	-2.75837
cg28261158_BC11	cg28261158	Raet1e	Raet1e_Exon	-0.00021699	0.80979	-4.89915	1.85906e-05	0.0059922	-2.76014
cg32648555_BC21	cg32648555	Sorbs3	Sorbs3_Intron	-0.000445949	0.655063	-4.89867	1.86182e-05	0.0059922	-2.76161
cg48081929_BC21	cg48081929	Rtl4	Rtl4_Intron	-0.000441684	0.815894	-4.89713	1.87074e-05	0.00601378	-2.76634
cg29822689_BC21	cg29822689	Zfp207	Zfp207_Exon	-0.000578998	0.775149	-4.89556	1.87986e-05	0.00602701	-2.77116
cg46692054_BC21	cg46692054	Sidt2	Sidt2_threeUTR	-0.000261913	0.848474	-4.89551	1.88017e-05	0.00602701	-2.77132
cg37503164_TC21	cg37503164	Lmod1	Lmod1_Intron	-0.000274778	0.370985	-4.8946	1.88547e-05	0.00602701	-2.7741
cg43302395_TC21	cg43302395	Cnot4	Cnot4_Exon	-0.000299273	0.903925	-4.89444	1.88642e-05	0.00602701	-2.7746
cg35616484_TO21	cg35616484	Gm37013	Gm37013_Exon	-0.000306611	0.337026	-4.89424	1.8876e-05	0.00602701	-2.77522
cg47579461_TC11	cg47579461	Gria3	Gria3_Intron	-0.000349672	0.830877	-4.89375	1.89042e-05	0.00602701	-2.7767
cg29198903_BC21	cg29198903	Ewsr1	Ewsr1_Exon	-0.000438718	0.832296	-4.89281	1.89599e-05	0.00602948	-2.77961
cg29786643_TC21	cg29786643	Efcab5	Efcab5_Intergenic_upstream	-0.00046234	0.439674	-4.89179	1.90198e-05	0.00604206	-2.78273
cg29033782_TC21	cg29033782	Frs2	Frs2_Promoter	-0.000216489	0.921062	-4.89078	1.90794e-05	0.00604972	-2.78583
cg33083963_TC21	cg33083963	Zfr	Zfr_Intron	-0.000257273	0.261896	-4.88896	1.91871e-05	0.00607563	-2.7914
cg47617660_BC11	cg47617660	Enox2	Enox2_Intron	-0.000397262	0.850871	-4.88791	1.925e-05	0.00608906	-2.79464
cg39872272_TC21	cg39872272	Nmd3	Nmd3_Exon	-0.00046795	0.461695	-4.88756	1.92709e-05	0.00608917	-2.79572
cg40962255_TC21	cg40962255	Fkbp15	Fkbp15_Intron	-0.000520482	0.809968	-4.88602	1.93628e-05	0.00611166	-2.80042
cg47903141_TC21	cg47903141	Cypt2	Cypt2_Intergenic_downstream	-0.000900139	0.753272	-4.88521	1.94118e-05	0.00611416	-2.80293
cg35927743_TO21	cg35927743	Rpl17	Rpl17_Intron	-0.000331636	0.748916	-4.88521	1.9412e-05	0.00611416	-2.80293
cg29080189_BC21	cg29080189	Msrb3	Msrb3_Intron	-0.000427262	0.841137	-4.88436	1.9463e-05	0.00612126	-2.80553
cg42922104_TC11	cg42922104	Ppp1r35	Ppp1r35_fiveUTR	0.000142779	0.0284548	4.88372	1.95017e-05	0.00612288	-2.8075
cg35082084_TC21	cg35082084	Nudt12os	Nudt12os_Intergenic_downstream	-0.000325748	0.316071	-4.88079	1.96793e-05	0.00616557	-2.81647
cg42361948_BC21	cg42361948	Tecrl	Tecrl_Intergenic_upstream	-0.000421395	0.422221	-4.88003	1.97261e-05	0.00617369	-2.81882
cg48218794_BC21	cg48218794	Zfy2	Zfy2_Intergenic_upstream	-0.00031746	0.884619	-4.87738	1.98884e-05	0.00621789	-2.82693
cg36721867_TC21	cg36721867	Mir30c-2	Mir30c-2_Intergenic_downstream	-0.000313979	0.874954	-4.87689	1.99189e-05	0.00622088	-2.82845
cg33058688_TC21	cg33058688	Ranbp3l	Ranbp3l_Intron	-0.000244253	0.83271	-4.87432	2.00778e-05	0.00626391	-2.83631
cg48170972_TC11	cg48170972	Ctps2	Ctps2_Intron	-0.000483762	0.676052	-4.87359	2.01237e-05	0.00627159	-2.83857
cg40562154_TC21	cg40562154	Mos	Mos_Intergenic_downstream	-0.000277697	0.680196	-4.87237	2.02001e-05	0.00628145	-2.84232
cg38995884_TC21	cg38995884	Hao1	Hao1_Intergenic_upstream	-0.0002854	0.852869	-4.87206	2.02189e-05	0.00628145	-2.84324
rs256858903_TC12	rs256858903			0.000122407	0.957922	4.87171	2.0241e-05	0.00628171	-2.84432
cg30698576_BC21	cg30698576	Fbxo33	Fbxo33_Exon	-0.000352618	0.652873	-4.87116	2.02759e-05	0.00628594	-2.84602
cg29571208_TC21	cg29571208	Nmur2	Nmur2_Intergenic_upstream	-0.000570688	0.697738	-4.86898	2.04133e-05	0.00632021	-2.85271
cg40562155_BC11	cg40562155	Mos	Mos_Intergenic_downstream	-0.000200538	0.610068	-4.86855	2.04402e-05	0.00632021	-2.85401
cg46981915_BC21	cg46981915	Mlip	Mlip_Exon	-0.000538358	0.706301	-4.86839	2.04504e-05	0.00632021	-2.85451
cg47929235_BC21	cg47929235	Cylc1	Cylc1_Promoter	-0.000513098	0.795532	-4.86596	2.06052e-05	0.00635478	-2.86197
cg30963833_BC21	cg30963833	Sel1l	Sel1l_Intergenic_upstream	0.000479013	0.688693	4.86442	2.07033e-05	0.00636434	-2.86667
cg47076591_TC21	cg47076591	Tbc1d2b	Tbc1d2b_Intron	-0.000252631	0.87814	-4.86412	2.07228e-05	0.00636434	-2.86759
cg28711028_BC21	cg28711028	Tmem259	Tmem259_Exon	-0.000328739	0.809002	-4.86408	2.07252e-05	0.00636434	-2.86771
cg41975387_TC21	cg41975387	Dnajb6	Dnajb6_Intergenic_downstream	-0.000302658	0.910519	-4.86398	2.07317e-05	0.00636434	-2.86802
cg40725951_BC21	cg40725951	Bach2	Bach2_Exon	-0.000269068	0.804281	-4.86379	2.07437e-05	0.00636434	-2.86859
cg39831972_BC21	cg39831972	Vmn2r3	Vmn2r3_Exon	-0.00060321	0.822054	-4.86257	2.08227e-05	0.00638196	-2.87235
cg34262842_TC21	cg34262842	Tfg	Tfg_Intron	-0.000408374	0.849159	-4.86164	2.08824e-05	0.00639365	-2.87519
cg36126335_TC21	cg36126335	Slc22a27	Slc22a27_Intergenic_upstream	-0.000344272	0.6095	-4.8609	2.09303e-05	0.0064017	-2.87746
cg39326327_BC21	cg39326327	Tshz2	Tshz2_Intron	-0.000314898	0.892697	-4.85975	2.10054e-05	0.00641585	-2.881
cg47663235_BC21	cg47663235	Gm364	Gm364_Intron	-0.000522674	0.779268	-4.85952	2.10199e-05	0.00641585	-2.88168
cg45123299_TC11	cg45123299	Ppp4c	Ppp4c_threeUTR	-0.000197191	0.897323	-4.85822	2.11053e-05	0.00643526	-2.88569
cg45934323_TC21	cg45934323	Tnpo2	Tnpo2_Promoter	0.000140336	0.0675038	4.85736	2.11615e-05	0.00644577	-2.88832
cg37824679_TC11	cg37824679	Catspere1	Catspere1_Intron	-0.000212728	0.608853	-4.85405	2.13794e-05	0.0065008	-2.89846
cg47902972_BC21	cg47902972	Cypt2	Cypt2_Promoter	-0.000332461	0.630896	-4.85336	2.14252e-05	0.0065008	-2.90057
cg28125900_BC21	cg28125900	Syne1	Syne1_Intron	-0.000170522	0.634082	-4.85332	2.14278e-05	0.0065008	-2.90069
cg41031755_BC11	cg41031755	Dmac1	Dmac1_Exon	0.000142118	0.0558036	4.85318	2.14371e-05	0.0065008	-2.90112
cg43226765_BC21	cg43226765	Gm20756	Gm20756_Promoter	-0.000588031	0.721069	-4.84782	2.17957e-05	0.00658476	-2.91754
cg36599146_BC11	cg36599146	Eif3a	Eif3a_Exon	-0.000205778	0.935644	-4.84634	2.18959e-05	0.00660155	-2.92207
cg48212849_BC11	cg48212849	Kdm5d	Kdm5d_Exon	-0.000294251	0.915959	-4.84589	2.19268e-05	0.00660294	-2.92346
cg35205485_TC21	cg35205485	Memo1	Memo1_Exon	-0.000422339	0.587013	-4.8455	2.19532e-05	0.00660294	-2.92466
cg41522007_BC21	cg41522007	Extl1	Extl1_Promoter	0.00021204	0.0888955	4.84529	2.19674e-05	0.00660294	-2.9253
cg38919635_BC21	cg38919635	Fam227b	Fam227b_fiveUTR	-0.000504515	0.819115	-4.84442	2.20265e-05	0.00661398	-2.92795
cg38774360_TC11	cg38774360	Elp4	Elp4_Intron	-0.000173845	0.944258	-4.84304	2.21208e-05	0.00662885	-2.93218
cg47753869_BC21	cg47753869	Cldn34b3	Cldn34b3_Intergenic_upstream	-0.000709765	0.69401	-4.84193	2.21967e-05	0.0066387	-2.93557
cg46505254_BC11	cg46505254	Anln	Anln_Intron	-0.000228465	0.925425	-4.84191	2.21985e-05	0.0066387	-2.93565
cg48217628_TC11	cg48217628	Zfy2	Zfy2_Intergenic_downstream	-0.000326383	0.849855	-4.84135	2.2237e-05	0.00664349	-2.93736
cg42169159_TC21	cg42169159	Gm10440	Gm10440_Intergenic_downstream	-0.000570562	0.788808	-4.8397	2.23508e-05	0.00667075	-2.94241
cg37689759_TC21	cg37689759	Suco	Suco_Exon	-0.000287809	0.91105	-4.83726	2.25198e-05	0.00671445	-2.94986
cg43864412_TC21	cg43864412	Slc6a11	Slc6a11_Intron	-0.000244933	0.683167	-4.83617	2.25959e-05	0.00673035	-2.9532
cg48238408_TC21	cg48238408	Gm20826	Gm20826_Intergenic_downstream	-0.00051841	0.718529	-4.83437	2.27224e-05	0.00676122	-2.95872
cg37866870_BC21	cg37866870	Lbr	Lbr_Intron	-0.000253629	0.89813	-4.83227	2.28704e-05	0.00677691	-2.96514
cg44178102_TC21	cg44178102	Resf1	Resf1_Intergenic_downstream	-0.000569305	0.789419	-4.83214	2.28799e-05	0.00677691	-2.96555
ctl-BS-RPS6KA3-CT-R-102262_BO11				0.000157879	0.0718364	4.83171	2.29106e-05	0.00677691	-2.96688
cg48017377_TC21	cg48017377	Nox1	Nox1_fiveUTR	-0.000648053	0.710573	-4.83169	2.29119e-05	0.00677691	-2.96693
cg37735193_BC21	cg37735193	Fam78b	Fam78b_Intron	-0.000249837	0.825275	-4.83163	2.29162e-05	0.00677691	-2.96712
cg41396378_TC11	cg41396378	Utp11	Utp11_Promoter	9.59665e-05	0.0251911	4.83121	2.29459e-05	0.00677691	-2.9684
cg48214177_BC21	cg48214177	Uty	Uty_Intron	-0.000432449	0.810126	-4.83103	2.29582e-05	0.00677691	-2.96893
cg28735063_TC21	cg28735063	Eef2	Eef2_Exon	0.000155248	0.453645	4.82919	2.30894e-05	0.00680885	-2.97456
cg34708492_BC21	cg34708492	Zfp53	Zfp53_Intron	-0.000446821	0.777398	-4.82829	2.31542e-05	0.00681224	-2.97734
cg30487587_TC21	cg30487587	Dcdc2c	Dcdc2c_Intergenic_downstream	-0.000311066	0.667821	-4.82784	2.31862e-05	0.00681224	-2.9787
cg29255186_BC21	cg29255186	Cobl	Cobl_Intron	-0.00014179	0.92484	-4.82502	2.33893e-05	0.00685631	-2.98733
cg47064030_TC11	cg47064030	Snx14	Snx14_threeUTR	-0.000576957	0.74874	-4.82394	2.34675e-05	0.00686619	-2.99063
cg34316996_TC21	cg34316996	Vgll3	Vgll3_Intergenic_upstream	-0.000424175	0.582664	-4.82325	2.35176e-05	0.0068684	-2.99273
cg48219683_BC21	cg48219683	H2al2b	H2al2b_Intergenic_upstream	-0.000616359	0.506624	-4.82318	2.35233e-05	0.0068684	-2.99298
cg46153550_BC21	cg46153550	8030455M16Rik	8030455M16Rik_Promoter	-0.000375105	0.733456	-4.82272	2.35562e-05	0.00687121	-2.99436
cg40443217_BC11	cg40443217	Clca1	Clca1_Promoter	-0.000316267	0.909755	-4.82174	2.36282e-05	0.00688134	-2.99738
cg43538608_BC21	cg43538608	Rpia	Rpia_Exon	-0.000803649	0.624992	-4.82076	2.36997e-05	0.00689271	-3.00036
cg31246301_BC12	cg31246301	Adarb2	Adarb2_Intron	-0.000576612	0.774091	-4.82039	2.37267e-05	0.00689377	-3.00149
cg47253164_BC21	cg47253164	Fbxw18	Fbxw18_Intron	-0.000243037	0.895706	-4.81831	2.38798e-05	0.00692507	-3.00785
cg32815654_BC11	cg32815654	Klhl1	Klhl1_Intergenic_upstream	-0.000595438	0.773465	-4.8183	2.38812e-05	0.00692507	-3.0079
cg33725044_BO21	cg33725044	Irak4	Irak4_Intron	-0.000564819	0.794182	-4.81709	2.397e-05	0.00693206	-3.01158
cg43000806_TC21	cg43000806	Bri3	Bri3_Intron	-0.000165355	0.93817	-4.81702	2.39755e-05	0.00693206	-3.0118
cg43485842_BC11	cg43485842	Gm5570	Gm5570_Intergenic_upstream	-0.000338661	0.887121	-4.81619	2.40372e-05	0.00694312	-3.01434
cg41122248_TC21	cg41122248	Gm12610	Gm12610_Intron	-0.000322078	0.883464	-4.81484	2.41376e-05	0.00696514	-3.01846
cg30419990_TC21	cg30419990	5730507C01Rik	5730507C01Rik_Intergenic_downstream	-0.000280701	0.785541	-4.81454	2.41605e-05	0.00696514	-3.0194
cg36601134_TC11	cg36601134	Zfp950	Zfp950_Intron	-0.000203971	0.930326	-4.81158	2.4382e-05	0.00700851	-3.02842
cg41147818_TC11	cg41147818	Ift74	Ift74_Intron	-0.000248274	0.898774	-4.80998	2.45036e-05	0.00703263	-3.03334
cg42429539_BC21	cg42429539	Ccng2	Ccng2_Intergenic_downstream	-0.000187855	0.918909	-4.80985	2.45134e-05	0.00703263	-3.03374
cg41051888_TC11	cg41051888	Tyrp1	Tyrp1_Intergenic_upstream	-0.000650184	0.812499	-4.80707	2.47245e-05	0.00708633	-3.04222
cg47576028_BC21	cg47576028	Gria3	Gria3_Intergenic_upstream	-0.000616584	0.726356	-4.80663	2.47586e-05	0.00708925	-3.04358
cg44612223_TC21	cg44612223	Ube3a	Ube3a_Exon	-0.000363192	0.900805	-4.80599	2.48075e-05	0.0070958	-3.04553
cg32081361_TC11	cg32081361	Ankrd55	Ankrd55_Exon	-0.000569005	0.86873	-4.80539	2.48533e-05	0.0070958	-3.04735
cg30999837_TC21	cg30999837	Eml5	Eml5_Intron	-0.000867272	0.737382	-4.80539	2.48534e-05	0.0070958	-3.04736
ctl-BS-RPL3L-CA-F-4307_TC21				-0.00026765	0.817398	-4.8048	2.4899e-05	0.00710197	-3.04917
cg37393999_BC21	cg37393999	Insig2	Insig2_Intron	-0.00032727	0.746061	-4.8036	2.49915e-05	0.00711608	-3.05283
cg36725578_BC11	cg36725578	B3gat2	B3gat2_Intron	-0.000435114	0.845094	-4.80353	2.49965e-05	0.00711608	-3.05303
cg29352062_TC21	cg29352062	Ccdc85a	Ccdc85a_Exon	-0.000304598	0.42349	-4.80231	2.50915e-05	0.0071294	-3.05678
cg45833085_TC11	cg45833085	Olfr374	Olfr374_Exon	-0.000389156	0.652325	-4.80125	2.51738e-05	0.00714593	-3.06002
cg43254412_BC11	cg43254412	Ahcyl2	Ahcyl2_Intron	-0.000479284	0.781255	-4.80056	2.5227e-05	0.00715418	-3.06211
cg47630474_TC21	cg47630474	Hs6st2	Hs6st2_Intron	-0.000321894	0.876591	-4.79985	2.52831e-05	0.00715875	-3.0643
cg48343126_BC21	cg48343126	G530011O06Rik	G530011O06Rik_Intergenic_downstream	-0.0004165	0.840268	-4.79974	2.52915e-05	0.00715875	-3.06463
cg42614962_BC11	cg42614962	Cmklr1	Cmklr1_Exon	-0.000138867	0.971725	-4.797	2.55064e-05	0.00721268	-3.07299
cg38716415_TC21	cg38716415	Lrrc4c	Lrrc4c_Exon	-0.000304309	0.878077	-4.79554	2.56221e-05	0.00723849	-3.07747
cg34863852_TC11	cg34863852	H2-Ea-ps	H2-Ea-ps_Promoter	-0.000355112	0.893272	-4.79428	2.57218e-05	0.0072539	-3.08131
cg48230299_TC21	cg48230299	Gm3376	Gm3376_Intergenic_downstream	-0.000629104	0.194686	-4.79423	2.57257e-05	0.0072539	-3.08146
cg37762718_TC21	cg37762718	Uhmk1	Uhmk1_threeUTR	-0.00016408	0.929363	-4.79255	2.58597e-05	0.00728476	-3.08659
cg36065583_BC21	cg36065583	Cpt1a	Cpt1a_Exon	-0.000249296	0.8698	-4.79156	2.59388e-05	0.00730009	-3.08961
cg48328707_TC11	cg48328707	Gm20736	Gm20736_Intergenic_downstream	-0.000527904	0.832812	-4.78913	2.61345e-05	0.00733472	-3.09704
cg28251098_TC21	cg28251098	Cdh20	Cdh20_Intron	-0.00011929	0.66618	-4.78887	2.61554e-05	0.00733472	-3.09783
ctl-BS-CCND3-CT-F-30104_TC21				-0.000530334	0.833683	-4.7888	2.61611e-05	0.00733472	-3.09804
cg29325122_BC12	cg29325122	Usp34	Usp34_Exon	-0.000491926	0.637954	-4.78835	2.61977e-05	0.00733472	-3.09943
cg44489335_BC21	cg44489335	Vmn2r63	Vmn2r63_Intergenic_upstream	-0.000170723	0.474365	-4.78821	2.62086e-05	0.00733472	-3.09984
cg47465337_BC21	cg47465337	Gm14635	Gm14635_Intergenic_downstream	-0.000649441	0.383243	-4.78819	2.62105e-05	0.00733472	-3.09991
cg43687614_TC21	cg43687614	Vmn1r44	Vmn1r44_threeUTR	-0.000731237	0.674688	-4.78611	2.63794e-05	0.00736855	-3.10626
rs230802589_BC21	rs230802589	Olfr1262	Olfr1262_fiveUTR	-0.000477809	0.873004	-4.78545	2.64334e-05	0.00736925	-3.10828
cg47843918_TC21	cg47843918	Msn	Msn_Intergenic_upstream	-0.000335652	0.853759	-4.78457	2.65051e-05	0.00737534	-3.11096
cg36162233_BC21	cg36162233	Olfr1441	Olfr1441_Intergenic_upstream	-0.000222803	0.330128	-4.784	2.65522e-05	0.0073815	-3.11271
ctl-BS-ARF4-CA-F-8633_TC11				-0.000130364	0.951881	-4.78218	2.6702e-05	0.00740977	-3.11827
cg29378174_TC21	cg29378174	Sh3pxd2b	Sh3pxd2b_Intergenic_upstream	-0.000260921	0.908522	-4.78185	2.67289e-05	0.00740977	-3.11927
cg43354793_TC21	cg43354793	Sva	Sva_Promoter	-0.000577108	0.308665	-4.77992	2.68889e-05	0.00744715	-3.12516
rs254962283_TC12	rs254962283			-0.000398881	0.887934	-4.77846	2.70102e-05	0.00746628	-3.12961
cg39116079_BC21	cg39116079	Tbc1d20	Tbc1d20_Exon	-0.000302258	0.871516	-4.77818	2.70336e-05	0.00746628	-3.13047
cg29812111_TC11	cg29812111	Nf1	Nf1_Intron	-0.000647243	0.611097	-4.77754	2.70868e-05	0.00746751	-3.13241
cg36725328_BC11	cg36725328	B3gat2	B3gat2_fiveUTR	0.000239694	0.149475	4.7767	2.71578e-05	0.00747963	-3.135
ctl-NP-RARS-4734-GT-1_TC21				0.000201386	0.0817035	4.77596	2.72197e-05	0.00748891	-3.13725
cg47605360_TC21	cg47605360	Smarca1	Smarca1_Exon	-0.000282894	0.260191	-4.77556	2.72532e-05	0.00748891	-3.13846
cg42421745_TC21	cg42421745	Ccdc158	Ccdc158_Exon	-0.000223906	0.916149	-4.77529	2.72763e-05	0.00748891	-3.1393
cg45640310_BC21	cg45640310	Fat1	Fat1_Intron	-0.000215469	0.911146	-4.77428	2.73615e-05	0.00749076	-3.14238
cg30817908_BC21	cg30817908	Tex21	Tex21_Promoter	-0.000321109	0.890457	-4.77419	2.7369e-05	0.00749076	-3.14265
cg44823621_TC21	cg44823621	Vmn2r77	Vmn2r77_Promoter	-0.000210547	0.896732	-4.77411	2.73753e-05	0.00749076	-3.14288
cg44941945_TC21	cg44941945	Olfr628	Olfr628_Promoter	-0.000631663	0.705911	-4.77377	2.74044e-05	0.00749181	-3.14393
cg34128420_TC21	cg34128420	Csta3	Csta3_Intron	-0.000353247	0.574025	-4.77235	2.75251e-05	0.0075149	-3.14827
cg31588983_TC21	cg31588983	Cks2	Cks2_Intergenic_upstream	-0.000419441	0.746672	-4.77218	2.75397e-05	0.0075149	-3.14879
cg44776341_TC11	cg44776341	Blm	Blm_Intron	-0.000599832	0.807241	-4.7713	2.76139e-05	0.00751989	-3.15145
cg29861261_TC11	cg29861261	Aatf	Aatf_Intron	-0.000274238	0.892302	-4.77123	2.762e-05	0.00751989	-3.15167
cg37194088_BC21	cg37194088	Ugt1a10	Ugt1a10_Intron	-0.000206222	0.228024	-4.77104	2.76361e-05	0.00751989	-3.15225
cg34775367_TC11	cg34775367	Grm4	Grm4_Intron	-0.000282964	0.609224	-4.77077	2.76595e-05	0.00751989	-3.15309
cg37431888_TC21	cg37431888	Acmsd	Acmsd_Promoter	-0.000353928	0.739064	-4.76998	2.77274e-05	0.00753143	-3.15551
cg44384905_BC21	cg44384905	Zfp27	Zfp27_Exon	-0.000207796	0.873699	-4.76889	2.78203e-05	0.00754973	-3.15881
cg47445526_TC21	cg47445526	Sytl5	Sytl5_Exon	-0.00111173	0.68171	-4.76826	2.78747e-05	0.00755757	-3.16074
cg29964133_TC21	cg29964133	Kat7	Kat7_Exon	-0.00026564	0.898202	-4.76696	2.79873e-05	0.00758114	-3.16472
cg30301750_BC21	cg30301750	Ogfod3	Ogfod3_Exon	-0.000261845	0.837852	-4.7649	2.8165e-05	0.00762233	-3.17098
cg32329617_BC21	cg32329617	Sfmbt1	Sfmbt1_Intron	-0.000532112	0.789832	-4.76433	2.82151e-05	0.00762889	-3.17273
cg38638793_BC21	cg38638793	Ssrp1	Ssrp1_Exon	-0.000272892	0.838382	-4.76401	2.8243e-05	0.00762948	-3.17371
cg31741763_BC21	cg31741763	Gm10767	Gm10767_fiveUTR	-0.000988823	0.687314	-4.76249	2.83757e-05	0.00765155	-3.17834
cg48223057_BC21	cg48223057	Gm3376	Gm3376_Intergenic_downstream	-0.000362887	0.853575	-4.76248	2.83764e-05	0.00765155	-3.17837
rs247824387_BC21	rs247824387	Prr32	Prr32_Intergenic_downstream	-0.000660959	0.739483	-4.76166	2.84483e-05	0.00765709	-3.18087
cg30407754_TC11	cg30407754	Kcnf1	Kcnf1_fiveUTR	0.000289374	0.155696	4.76147	2.84653e-05	0.00765709	-3.18146
cg46787331_BC11	cg46787331	Lingo1	Lingo1_Intron	-0.000281256	0.531497	-4.76135	2.84754e-05	0.00765709	-3.18181
cg28702694_TC21	cg28702694	Mier2	Mier2_fiveUTR	-0.00037314	0.848542	-4.76107	2.85004e-05	0.00765709	-3.18267
cg45134986_BC21	cg45134986	Rnf40	Rnf40_Exon	-0.000242799	0.77827	-4.76055	2.85465e-05	0.00766252	-3.18427
cg31513278_TC21	cg31513278	Gm5083	Gm5083_Exon	-0.000222591	0.935712	-4.75869	2.87108e-05	0.00769266	-3.18994
rs259233921_BC11	rs259233921	Mir7j	Mir7j_Intergenic_downstream	0.00037329	0.132953	4.75698	2.88628e-05	0.00771451	-3.19516
cg40469184_TC21	cg40469184	Ttll7	Ttll7_Exon	0.000480316	0.686484	4.7566	2.88965e-05	0.00771451	-3.19631
cg37085061_TC11	cg37085061	Gpbar1	Gpbar1_Exon	-0.000166983	0.966834	-4.75478	2.9059e-05	0.0077493	-3.20185
cg47271756_BC11	cg47271756	Trank1	Trank1_Promoter	0.000118643	0.0360528	4.75456	2.90792e-05	0.0077493	-3.20254
cg31584243_TC21	cg31584243	Hist1h2al	Hist1h2al_Promoter	-0.000384579	0.547239	-4.75322	2.91992e-05	0.00777429	-3.2066
cg48215592_BC21	cg48215592	Usp9y	Usp9y_Exon	-0.000393567	0.851489	-4.75202	2.93073e-05	0.00779607	-3.21026
cg48077514_BC21	cg48077514	Dcx	Dcx_Intergenic_upstream	-0.000263396	0.871643	-4.74873	2.9607e-05	0.00781261	-3.22031
cg31447575_BC11	cg31447575	Rreb1	Rreb1_Intergenic_upstream	-0.00031037	0.900866	-4.74868	2.96116e-05	0.00781261	-3.22046
cg38213246_TC21	cg38213246	Lrrc8a	Lrrc8a_Intron	-0.000319378	0.835107	-4.74825	2.96504e-05	0.00781261	-3.22175
cg44295538_TC11	cg44295538	Tomm40	Tomm40_Promoter	0.000209776	0.0558402	4.74821	2.96545e-05	0.00781261	-3.22189
cg28620908_TC21	cg28620908	Fam13c	Fam13c_Intron	-0.000283232	0.917593	-4.74801	2.96726e-05	0.00781261	-3.22249
cg30933292_BC21	cg30933292	Mir3068	Mir3068_Exon	-0.000303394	0.704483	-4.74796	2.96769e-05	0.00781261	-3.22263
cg47802831_TC21	cg47802831	Il1rapl1	Il1rapl1_Intron	-0.000516137	0.807188	-4.74792	2.96812e-05	0.00781261	-3.22278
cg29358448_BC21	cg29358448	Clhc1	Clhc1_Intron	-0.000302777	0.17239	-4.74772	2.96989e-05	0.00781261	-3.22337
cg48220143_BC21	cg48220143	H2al2b	H2al2b_Intergenic_upstream	-0.000621199	0.748274	-4.74766	2.97042e-05	0.00781261	-3.22354
cg48214761_TC11	cg48214761	Ddx3y	Ddx3y_Intron	-0.000541578	0.803728	-4.74739	2.97294e-05	0.00781261	-3.22438
cg31113366_BC21	cg31113366	Wdr25	Wdr25_Intron	-0.000338926	0.868036	-4.74722	2.97453e-05	0.00781261	-3.22491
cg48214271_TC11	cg48214271	Uty	Uty_Exon	-0.000489135	0.843384	-4.74675	2.97882e-05	0.00781261	-3.22633
cg44923929_BC11	cg44923929	Stard10	Stard10_fiveUTR	0.000177809	0.0402812	4.74666	2.97967e-05	0.00781261	-3.22661
cg38246420_TC11	cg38246420	St6galnac4	St6galnac4_Exon	-0.000107987	0.982649	-4.74662	2.98001e-05	0.00781261	-3.22672
cg42649373_TC21	cg42649373	Gcn1	Gcn1_Promoter	-0.000580829	0.649985	-4.74646	2.98144e-05	0.00781261	-3.2272
cg34899452_BC21	cg34899452	Olfr114	Olfr114_Promoter	-0.000322808	0.852162	-4.74642	2.98181e-05	0.00781261	-3.22732
cg47470912_TC21	cg47470912	AA414768	AA414768_Intergenic_downstream	-0.000431352	0.802443	-4.7418	3.02464e-05	0.00790383	-3.24141
cg36455707_BC21	cg36455707	Nolc1	Nolc1_Intron	-0.000497352	0.752541	-4.73965	3.04478e-05	0.00794946	-3.24796
cg43082757_TC21	cg43082757	Stard13	Stard13_Intron	-0.00034244	0.788503	-4.73898	3.05103e-05	0.00795552	-3.24999
cg40088181_TC21	cg40088181	Hsd3b1	Hsd3b1_Exon	-0.000438378	0.654236	-4.73835	3.05703e-05	0.00795552	-3.25193
cg33253604_TC21	cg33253604	Ncald	Ncald_Intergenic_upstream	-0.000455202	0.830931	-4.7381	3.05938e-05	0.00795552	-3.25269
cg43221135_TC21	cg43221135	Spam1	Spam1_Intron	-0.00028046	0.912396	-4.73778	3.06241e-05	0.00795552	-3.25366
cg34440641_BC11	cg34440641	Gm32461	Gm32461_Intron	-0.000561264	0.45821	-4.73753	3.06477e-05	0.00795552	-3.25443
cg36015179_BC11	cg36015179	Zfp516	Zfp516_Intron	0.000238171	0.073909	4.73741	3.06591e-05	0.00795552	-3.25479
cg47188237_TC21	cg47188237	Tmem108	Tmem108_Intron	-0.000235456	0.8659	-4.7361	3.07824e-05	0.00798052	-3.25876
cg38646912_BC11	cg38646912	Olfr1090	Olfr1090_Promoter	-0.000687317	0.809051	-4.73522	3.08661e-05	0.00799521	-3.26144
cg29122899_TC21	cg29122899	Slc16a7	Slc16a7_Intron	-0.000177591	0.92664	-4.7339	3.09929e-05	0.00801284	-3.26549
cg38659164_BC11	cg38659164	Olfr1254	Olfr1254_Promoter	0.000249728	0.101959	4.73373	3.10085e-05	0.00801284	-3.26598
cg48052312_TC21	cg48052312	Rbm41	Rbm41_Intron	-0.000558642	0.672555	-4.73309	3.10704e-05	0.00802007	-3.26795
cg33435232_BC21	cg33435232	Phf20l1	Phf20l1_Exon	-0.000327535	0.874916	-4.73215	3.11605e-05	0.0080334	-3.27081
cg34086536_BC21	cg34086536	Ubxn7	Ubxn7_Promoter	-0.000288916	0.829482	-4.7318	3.11937e-05	0.0080334	-3.27187
cg33803312_BC21	cg33803312	Mettl7a1	Mettl7a1_Intron	-0.000196123	0.848773	-4.7317	3.12035e-05	0.0080334	-3.27217
cg36169983_TC21	cg36169983	Olfr1504	Olfr1504_Promoter	-0.000588769	0.715642	-4.72893	3.14709e-05	0.00808197	-3.2806
cg37685782_TC21	cg37685782	Prdx6	Prdx6_Intergenic_upstream	-0.000559969	0.786882	-4.72757	3.16036e-05	0.00810822	-3.28476
cg30879840_BC21	cg30879840	Rgs6	Rgs6_Intron	-0.000260154	0.826218	-4.72656	3.17015e-05	0.00812628	-3.28781
cg42961111_BC21	cg42961111	Sdk1	Sdk1_Intergenic_upstream	-0.000283588	0.479639	-4.72614	3.17428e-05	0.00812983	-3.2891
cg41499187_TC21	cg41499187	Stx12	Stx12_Intron	-0.000471939	0.785942	-4.72321	3.20311e-05	0.00818024	-3.29802
cg48140587_BC21	cg48140587	Smpx	Smpx_Exon	-0.000361248	0.155521	-4.72302	3.20501e-05	0.00818024	-3.29861
cg31416024_BC21	cg31416024	Serpinb9c	Serpinb9c_Intergenic_downstream	-0.000223952	0.343467	-4.72143	3.22073e-05	0.00821328	-3.30344
cg45714019_TC21	cg45714019	Wdr17	Wdr17_Exon	-0.000192906	0.9173	-4.72114	3.22356e-05	0.00821342	-3.30431
cg40772930_TC21	cg40772930	1700009N14Rik	1700009N14Rik_Intergenic_upstream	-0.00051513	0.575768	-4.72081	3.22692e-05	0.00821492	-3.30534
cg28215550_BC21	cg28215550	Cited2	Cited2_Intergenic_upstream	-0.000346645	0.861923	-4.7205	3.22995e-05	0.00821556	-3.30626
cg48215414_TC21	cg48215414	Usp9y	Usp9y_Intron	-0.000412976	0.482019	-4.71896	3.24535e-05	0.00824764	-3.31096
cg45657639_BC11	cg45657639	Irf2	Irf2_Promoter	0.000181936	0.0778462	4.71804	3.25457e-05	0.00826397	-3.31376
cg39997319_BC11	cg39997319	Khdc4	Khdc4_Exon	7.43952e-05	0.0169136	4.71715	3.26347e-05	0.00827239	-3.31645
cg48183483_BC21	cg48183483	Fancb	Fancb_Intergenic_downstream	-0.00037197	0.745048	-4.71682	3.26677e-05	0.00827366	-3.31745
cg48049935_BC21	cg48049935	Rnf128	Rnf128_Intron	-0.00040917	0.852942	-4.71511	3.28409e-05	0.00830834	-3.32267
cg32973403_BC21	cg32973403	Oxgr1	Oxgr1_fiveUTR	-0.000333068	0.755929	-4.71463	3.28887e-05	0.00830834	-3.32411
cg48194898_BC21	cg48194898	Gm8817	Gm8817_Intergenic_upstream	-0.000743488	0.598749	-4.71395	3.29583e-05	0.00831882	-3.3262
cg46361640_BC21	cg46361640	Slc35f3	Slc35f3_Intron	-0.000383965	0.430763	-4.71351	3.30028e-05	0.00832294	-3.32753
cg38942255_BC11	cg38942255	Morrbid	Morrbid_Intron	-0.000365388	0.86433	-4.71264	3.30917e-05	0.00833826	-3.33018
cg31346391_BC21	cg31346391	H1f3	H1f3_fiveUTR	-0.000188295	0.916642	-4.71109	3.32495e-05	0.00836379	-3.33488
ctl-BS-FOLR1-CA-F-3342_TC21				-0.000230391	0.909633	-4.70974	3.33881e-05	0.00839152	-3.33899
cg47836397_BC21	cg47836397	Gspt2	Gspt2_Exon	-0.000320628	0.38555	-4.70901	3.34639e-05	0.00840343	-3.34122
cg38927105_TC21	cg38927105	Sppl2a	Sppl2a_Intron	-0.000160941	0.928714	-4.70771	3.35984e-05	0.00840778	-3.34518
cg47958034_BC21	cg47958034	Tgif2lx2	Tgif2lx2_Intergenic_upstream	-0.000474555	0.765706	-4.70768	3.36011e-05	0.00840778	-3.34526
ctl-BS-HIST1H2BC-CT-R-2990_TC21				-0.00036008	0.876698	-4.70766	3.36032e-05	0.00840778	-3.34533
cg40655459_BC21	cg40655459	Cnbd1	Cnbd1_Intron	-0.000667292	0.728653	-4.70756	3.36134e-05	0.00840778	-3.34563
cg44354396_BC21	cg44354396	Ttc9b	Ttc9b_Promoter	-0.000354642	0.535098	-4.70747	3.36232e-05	0.00840778	-3.34591
rs257429108_TC12	rs257429108	Spertl	Spertl_Intergenic_downstream	0.000204319	0.0844777	4.70644	3.37298e-05	0.00842481	-3.34904
cg36363228_TC21	cg36363228	Cyp26a1	Cyp26a1_Intergenic_downstream	-0.000384557	0.773795	-4.70626	3.37482e-05	0.00842481	-3.34958
cg42087743_BC21	cg42087743	Cpeb2	Cpeb2_Intergenic_upstream	-0.000441068	0.799646	-4.70598	3.37772e-05	0.00842496	-3.35043
cg47811573_TC21	cg47811573	4932429P05Rik	4932429P05Rik_Intergenic_upstream	-0.000275166	0.879705	-4.70547	3.38305e-05	0.00843114	-3.35198
cg28358763_TC21	cg28358763	4930591E09Rik	4930591E09Rik_Intergenic_upstream	-0.000371367	0.582686	-4.70515	3.38642e-05	0.00843245	-3.35296
cg31748355_TC21	cg31748355	4930525G20Rik	4930525G20Rik_Promoter	0.000170552	0.0954195	4.70385	3.39999e-05	0.00843534	-3.35691
cg40729510_TC21	cg40729510	Bach2	Bach2_fiveUTR	-0.000307765	0.818576	-4.70371	3.40148e-05	0.00843534	-3.35734
cg34713757_BC11	cg34713757	Zfp758	Zfp758_Intron	-0.000151343	0.939887	-4.70357	3.4029e-05	0.00843534	-3.35776
cg40296566_BC11	cg40296566	Ank2	Ank2_Intron	-0.000332157	0.878686	-4.70303	3.40853e-05	0.00843534	-3.35939
cg37064301_BC11	cg37064301	4933417E11Rik	4933417E11Rik_Intron	-0.000258172	0.534902	-4.70289	3.41008e-05	0.00843534	-3.35984
cg48214704_BC21	cg48214704	Ddx3y	Ddx3y_Intergenic_downstream	-0.000424793	0.828531	-4.70286	3.41037e-05	0.00843534	-3.35992
cg31285260_BC21	cg31285260	Ggps1	Ggps1_threeUTR	-0.00047454	0.814204	-4.70286	3.41038e-05	0.00843534	-3.35992
cg40177185_TC21	cg40177185	Fndc7	Fndc7_Intron	-0.000325442	0.849519	-4.70173	3.42225e-05	0.00845736	-3.36335
cg31343032_BC21	cg31343032	4930557F10Rik	4930557F10Rik_Intron	-0.000499837	0.750168	-4.70147	3.42499e-05	0.00845736	-3.36414
cg47989272_BC21	cg47989272	4921511C20Rik	4921511C20Rik_Intergenic_downstream	-0.00052908	0.763328	-4.69914	3.44964e-05	0.00850724	-3.37122
cg41447690_BC21	cg41447690	Zfp362	Zfp362_Intron	-0.000484526	0.835579	-4.69902	3.45094e-05	0.00850724	-3.37159
cg47228590_TC11	cg47228590	Rassf1	Rassf1_Promoter	0.000491223	0.0984155	4.6983	3.45859e-05	0.00851871	-3.37378
cg36153849_BC21	cg36153849	AW112010	AW112010_Intergenic_downstream	-0.000281966	0.613363	-4.69804	3.46135e-05	0.00851871	-3.37456
cg38645240_TC21	cg38645240	Olfr1055	Olfr1055_Promoter	-0.00038011	0.860333	-4.69735	3.46874e-05	0.00852982	-3.37667
cg44760848_TC21	cg44760848	Fanci	Fanci_Intron	-0.000486667	0.623978	-4.69578	3.48558e-05	0.0085641	-3.38145
cg28619090_TC11	cg28619090	Slc16a9	Slc16a9_Exon	-0.000803626	0.537494	-4.695	3.49386e-05	0.00857702	-3.38379
cg36161365_TC21	cg36161365	Olfr1431	Olfr1431_fiveUTR	-0.000774075	0.657844	-4.69475	3.49663e-05	0.00857702	-3.38457
cg46091158_BC21	cg46091158	Ces2a	Ces2a_Promoter	-0.000381186	0.455573	-4.69323	3.51297e-05	0.00860354	-3.38918
cg40874493_BC21	cg40874493	Tmem246	Tmem246_threeUTR	-0.000423285	0.2566	-4.69321	3.51325e-05	0.00860354	-3.38926
cg32650277_TC21	cg32650277	Slc39a14	Slc39a14_Promoter	-0.000418	0.635896	-4.6918	3.52845e-05	0.00863363	-3.39352
cg48120789_TC21	cg48120789	Klf8	Klf8_Intergenic_downstream	-0.000234849	0.898438	-4.69119	3.53519e-05	0.00863915	-3.3954
cg48221500_BO21	cg48221500	Gm21708	Gm21708_Exon	-0.000218199	0.148324	-4.69106	3.53654e-05	0.00863915	-3.39578
cg37579631_BC11	cg37579631	Brinp3	Brinp3_Intergenic_downstream	-0.000893653	0.724739	-4.69019	3.54604e-05	0.0086552	-3.39842
ctl-BS-HK2-CA-R-24856_TO11				-0.000440245	0.839765	-4.68891	3.56002e-05	0.00866086	-3.40231
cg41846013_TC21	cg41846013	Tmem243	Tmem243_Intron	-0.000182616	0.912592	-4.68891	3.56006e-05	0.00866086	-3.40232
rs244908367_BC21	rs244908367	Lrrtm4	Lrrtm4_Intron	-0.000173139	0.928476	-4.68757	3.57473e-05	0.00868942	-3.40638
cg40278477_BC21	cg40278477	Ndst3	Ndst3_Exon	-0.000577453	0.831472	-4.6873	3.57778e-05	0.00868968	-3.40722
cg48044927_TC21	cg48044927	Il1rapl2	Il1rapl2_Intron	-0.0005336	0.798851	-4.68702	3.58079e-05	0.00868987	-3.40805
rs29977096_TC11	rs29977096	Colec12	Colec12_Intergenic_downstream	0.000182136	0.0699429	4.68611	3.59081e-05	0.00869994	-3.41081
cg36704339_TC21	cg36704339	Mir133b	Mir133b_Intergenic_downstream	-0.000242869	0.584338	-4.68541	3.59854e-05	0.00871154	-3.41293
cg48059087_TC21	cg48059087	Tex13b	Tex13b_Intergenic_downstream	-0.000237747	0.910088	-4.68452	3.60846e-05	0.00872074	-3.41564
cg39976576_BC11	cg39976576	Dclk2	Dclk2_fiveUTR	8.97034e-05	0.0219248	4.68409	3.61323e-05	0.00872074	-3.41695
cg33808160_TC21	cg33808160	Smagp	Smagp_Intron	-0.000345364	0.779035	-4.68408	3.61337e-05	0.00872074	-3.41698
rs46462788_TC21	rs46462788			-0.000226157	0.909952	-4.68401	3.61413e-05	0.00872074	-3.41719
cg44904372_TC21	cg44904372	Gdpd5	Gdpd5_Intron	-0.000347491	0.83921	-4.68287	3.62682e-05	0.00874424	-3.42065
cg39401184_TC21	cg39401184	Cdh26	Cdh26_fiveUTR	-0.000232011	0.771567	-4.68231	3.63308e-05	0.00874597	-3.42235
cg40510813_BC11	cg40510813	Pigk	Pigk_Intron	-0.000540396	0.740243	-4.67918	3.66828e-05	0.00882265	-3.43187
cg48170013_TC21	cg48170013	Txlng	Txlng_Promoter	-0.00029938	0.902929	-4.67749	3.68737e-05	0.00886137	-3.43699
cg34910690_TC11	cg34910690	Esp38	Esp38_Promoter	-0.000424638	0.454917	-4.67609	3.70334e-05	0.00888533	-3.44125
ctl-NP-RPS6KA5-119265-GC-1_BC21				-0.000153282	0.943571	-4.67551	3.70988e-05	0.00889379	-3.44299
cg44095971_TC11	cg44095971	Plekha5	Plekha5_Promoter	0.000152838	0.0404487	4.67299	3.73881e-05	0.00894102	-3.45066
cg31284935_BC21	cg31284935	Tbce	Tbce_Intron	-0.000159307	0.930721	-4.67274	3.74166e-05	0.00894102	-3.45141
cg28437645_TC11	cg28437645	D030045P18Rik	D030045P18Rik_Intergenic_downstream	-0.000127045	0.470718	-4.67224	3.74739e-05	0.00894751	-3.45292
cg29559373_TC11	cg29559373	Hint1	Hint1_Exon	0.000273786	0.0774143	4.67148	3.75624e-05	0.00896141	-3.45525
cg45294343_TC21	cg45294343	E230032D23Rik	E230032D23Rik_fiveUTR	-0.000265562	0.261524	-4.67097	3.7621e-05	0.00896817	-3.45679
cg47575135_TC21	cg47575135	Cypt14	Cypt14_Intron	-0.000665638	0.727436	-4.66904	3.78443e-05	0.00901412	-3.46262
cg40460330_BC21	cg40460330	Spata1	Spata1_Intron	-0.000400785	0.867297	-4.66828	3.79329e-05	0.0090252	-3.46493
cg47712776_TC21	cg47712776	Fmr1nb	Fmr1nb_Promoter	-0.0008308	0.730682	-4.66812	3.79518e-05	0.0090252	-3.46542
cg48218714_TC21	cg48218714	Zfy2	Zfy2_Intergenic_upstream	-0.000359713	0.548634	-4.66747	3.80284e-05	0.00903018	-3.46741
cg46320376_TC21	cg46320376	Galnt2	Galnt2_Exon	-0.000300786	0.782745	-4.66742	3.80337e-05	0.00903018	-3.46755
cg28274357_BC11	cg28274357	Rps12	Rps12_Promoter	-0.00048073	0.865402	-4.66709	3.80728e-05	0.00903223	-3.46856
cg46616143_TC21	cg46616143	Olfr894	Olfr894_Promoter	-0.000267978	0.89123	-4.6658	3.82242e-05	0.00905572	-3.47248
cg34846087_BC21	cg34846087	Cyp4f40	Cyp4f40_Intron	-0.000476972	0.551354	-4.66572	3.8233e-05	0.00905572	-3.47271
ctl-BS-HK1-CA-R-13912_TO21				-9.74516e-05	0.956344	-4.66495	3.83243e-05	0.00906359	-3.47506
cg48214121_BC11	cg48214121	Uty	Uty_Intron	-0.000537304	0.567225	-4.66492	3.83275e-05	0.00906359	-3.47514
cg28746516_TC21	cg28746516	Zfp781	Zfp781_Intergenic_upstream	-0.000125924	0.641737	-4.66402	3.84332e-05	0.00908134	-3.47786
cg44786413_BC21	cg44786413	Cpeb1	Cpeb1_Exon	-0.000283008	0.323197	-4.66329	3.85197e-05	0.00909451	-3.48007
cg34080537_BC21	cg34080537	Dlg1	Dlg1_Intron	-0.000168128	0.929695	-4.66217	3.86533e-05	0.00911879	-3.48349
cg41458506_TC21	cg41458506	Marcksl1	Marcksl1_Promoter	-0.000307074	0.392205	-4.66181	3.86958e-05	0.00912154	-3.48457
cg39266181_BC21	cg39266181	Zmynd8	Zmynd8_Exon	-0.000228669	0.875381	-4.66094	3.87988e-05	0.00913391	-3.4872
cg48148529_TC11	cg48148529	Rps6ka3	Rps6ka3_Intron	-0.000418229	0.875596	-4.66085	3.88099e-05	0.00913391	-3.48748
cg47093034_BC21	cg47093034	1700034K08Rik	1700034K08Rik_Exon	-0.000403457	0.827336	-4.66019	3.88884e-05	0.0091451	-3.48947
cg47517270_TC21	cg47517270	Ppp1r2-ps7	Ppp1r2-ps7_Intergenic_downstream	-0.000267597	0.889289	-4.65985	3.89298e-05	0.00914757	-3.49052
ctl-BS-COX5A-CT-R-4434_BO21				0.000259227	0.102781	4.65876	3.90603e-05	0.00917097	-3.49382
cg32174420_TC21	cg32174420	Fhit	Fhit_Intron	-0.000225012	0.920717	-4.65817	3.91309e-05	0.00918025	-3.4956
cg29618806_BC21	cg29618806	Dhrs7b	Dhrs7b_Intron	-0.000447585	0.667088	-4.6577	3.91878e-05	0.00918632	-3.49704
cg33745192_BC21	cg33745192	Arid2	Arid2_threeUTR	-0.000439048	0.78774	-4.65675	3.93021e-05	0.00920583	-3.49991
cg29526248_TC11	cg29526248	0610009B22Rik	0610009B22Rik_Exon	-0.000676266	0.375067	-4.65615	3.93751e-05	0.00921438	-3.50174
cg43424546_BC21	cg43424546	Halr1	Halr1_Intron	-0.000244845	0.917767	-4.65594	3.94008e-05	0.00921438	-3.50238
cg32856246_TC21	cg32856246	Lmo7	Lmo7_Intron	-0.000311462	0.894593	-4.65489	3.95277e-05	0.00923675	-3.50555
cg48064885_TC21	cg48064885	Gucy2f	Gucy2f_Intergenic_downstream	-0.000135304	0.954346	-4.65266	3.97997e-05	0.00929297	-3.51232
cg45649621_BC21	cg45649621	Snx25	Snx25_Intron	-0.000339856	0.870022	-4.65196	3.98849e-05	0.00930552	-3.51443
cg42000751_TC21	cg42000751	Plb1	Plb1_Exon	-0.000412981	0.739913	-4.65014	4.01084e-05	0.00933755	-3.51994
cg37056451_BC21	cg37056451	Bard1	Bard1_Exon	-0.000279631	0.824916	-4.6501	4.01142e-05	0.00933755	-3.52008
cg37197390_BC21	cg37197390	Glrp1	Glrp1_Intergenic_downstream	-0.0002892	0.914047	-4.65008	4.01167e-05	0.00933755	-3.52014
cg40667885_TC11	cg40667885	Prdm13	Prdm13_Intergenic_downstream	-0.000584828	0.622922	-4.6491	4.0238e-05	0.00935842	-3.52312
cg46761532_BC21	cg46761532	Cul5	Cul5_Intron	-0.000265488	0.877405	-4.64761	4.04223e-05	0.0093868	-3.52763
cg46667710_TC11	cg46667710	Thy1	Thy1_fiveUTR	-0.000267635	0.918569	-4.6476	4.04235e-05	0.0093868	-3.52766
cg44932391_TC11	cg44932391	Chrna10	Chrna10_Exon	-0.000323884	0.871522	-4.64723	4.04695e-05	0.00939012	-3.52878
cg31075646_BC21	cg31075646	Vrk1	Vrk1_Intergenic_upstream	-0.000596885	0.751673	-4.64427	4.08389e-05	0.00946841	-3.53774
cg30791539_TC21	cg30791539	Slc38a6	Slc38a6_Intergenic_downstream	-0.000225915	0.89612	-4.64249	4.1063e-05	0.00951294	-3.54314
cg35468132_BC21	cg35468132	Cdh2	Cdh2_Intergenic_downstream	-0.000643694	0.660491	-4.64213	4.11087e-05	0.00951607	-3.54423
cg43189738_BC11	cg43189738	Mir6370	Mir6370_Intergenic_downstream	-0.000662341	0.783368	-4.6417	4.11631e-05	0.00952123	-3.54554
cg30870311_TC21	cg30870311	Pcnx	Pcnx_Intron	-0.000495744	0.798577	-4.64021	4.13522e-05	0.00954306	-3.55006
cg37483834_BC21	cg37483834	Lax1	Lax1_Intron	-0.000349291	0.851541	-4.64019	4.13542e-05	0.00954306	-3.55011
ctl-NP-HK1-102321-GC-0_BO21				-0.000250131	0.729291	-4.63943	4.14505e-05	0.00955783	-3.5524
cg44744753_TC21	cg44744753	Agbl1	Agbl1_Intergenic_downstream	-0.000605551	0.672519	-4.63836	4.15879e-05	0.00957573	-3.55566
cg32607493_TC21	cg32607493	Ccdc25	Ccdc25_Intron	-0.000215896	0.555615	-4.63832	4.15928e-05	0.00957573	-3.55578
cg38450088_BC21	cg38450088	Tank	Tank_Exon	-0.000615661	0.79025	-4.63755	4.16916e-05	0.009591	-3.55812
cg48213076_TC21	cg48213076	Kdm5d	Kdm5d_threeUTR	-0.00065492	0.831687	-4.63683	4.17828e-05	0.00960452	-3.56027
cg33958889_TC21	cg33958889	Med15	Med15_Exon	-0.000346518	0.859072	-4.63538	4.19696e-05	0.00963999	-3.56467
cg31982403_BC11	cg31982403	Gtf2h2	Gtf2h2_threeUTR	-0.000429404	0.854903	-4.63417	4.21258e-05	0.00964829	-3.56833
cg36449249_BC21	cg36449249	Fbxw4	Fbxw4_Intron	-0.000219484	0.916978	-4.63413	4.21306e-05	0.00964829	-3.56845
cg36150673_BC21	cg36150673	A430093F15Rik	A430093F15Rik_Intron	-0.000613305	0.757831	-4.63409	4.21361e-05	0.00964829	-3.56857
cg33602849_TC21	cg33602849	Bik	Bik_Intron	-0.000216465	0.908643	-4.6336	4.22003e-05	0.00965116	-3.57008
cg28170566_TC21	cg28170566	Grm1	Grm1_Intron	-0.000249429	0.894796	-4.63317	4.22559e-05	0.00965116	-3.57137
cg29702833_TC21	cg29702833	Chd3	Chd3_Intron	-0.000282143	0.824359	-4.63301	4.22761e-05	0.00965116	-3.57185
cg32463905_BC21	cg32463905	Armh4	Armh4_Intron	-0.0005231	0.696862	-4.63286	4.2296e-05	0.00965116	-3.57231
cg44342628_TC21	cg44342628	Nlrp9a	Nlrp9a_Intron	-0.000460995	0.335594	-4.63274	4.23116e-05	0.00965116	-3.57267
cg36641499_BC21	cg36641499	Cspp1	Cspp1_threeUTR	-0.000335114	0.851218	-4.63205	4.24008e-05	0.00965159	-3.57475
cg42889679_TC21	cg42889679	Pom121	Pom121_Intron	-0.000203744	0.903708	-4.632	4.24083e-05	0.00965159	-3.57492
cg39901047_TC21	cg39901047	Golim4	Golim4_Intron	-0.000333431	0.760442	-4.63138	4.24884e-05	0.00965159	-3.57678
cg33940627_TC21	cg33940627	Efcab1	Efcab1_Intergenic_downstream	-0.000741503	0.595642	-4.63104	4.25334e-05	0.00965159	-3.57783
cg42471760_TC21	cg42471760	Gm38413	Gm38413_Exon	-0.000135013	0.612349	-4.63097	4.25417e-05	0.00965159	-3.57802
cg48001849_TC11	cg48001849	Diaph2	Diaph2_Intergenic_downstream	-0.00055695	0.789725	-4.6306	4.25907e-05	0.00965531	-3.57916
cg35892428_BC21	cg35892428	Mbd2	Mbd2_Intron	-0.000190395	0.913081	-4.63005	4.26623e-05	0.00966413	-3.58081
cg41554959_BC11	cg41554959	Kdm1a	Kdm1a_Exon	-0.000574682	0.714832	-4.62912	4.27848e-05	0.00967708	-3.58364
cg34604103_BC21	cg34604103	Rps6ka2	Rps6ka2_Intron	-0.000221623	0.806101	-4.628	4.29312e-05	0.00970277	-3.58701
ctl-BS-RPS6KA6-CA-F-7328_BO21				-0.000106822	0.944068	-4.62774	4.29663e-05	0.00970331	-3.58781
cg33889648_BC21	cg33889648	Pmm2	Pmm2_Exon	-0.000368229	0.478683	-4.62653	4.31266e-05	0.00972965	-3.59148
cg40318673_BC11	cg40318673	Elovl6	Elovl6_Intron	-0.000800895	0.700329	-4.62632	4.31539e-05	0.00972965	-3.59211
cg37949653_BC11	cg37949653	Smyd2	Smyd2_Intergenic_upstream	-0.00026588	0.631955	-4.62595	4.3203e-05	0.00972965	-3.59323
cg47891219_BC21	cg47891219	Jpx	Jpx_Exon	-0.00032822	0.835277	-4.6258	4.32226e-05	0.00972965	-3.59368
cg34604733_TC21	cg34604733	Ttll2	Ttll2_Intron	-0.000278338	0.76566	-4.62561	4.32473e-05	0.00972965	-3.59424
cg47955632_BC21	cg47955632	H2afb1	H2afb1_Intergenic_downstream	-0.000636559	0.790368	-4.62474	4.33634e-05	0.00974838	-3.59688
cg39825514_TC21	cg39825514	Mme	Mme_Intergenic_upstream	-0.000380904	0.713948	-4.62436	4.34145e-05	0.00975079	-3.59804
cg40031094_TC21	cg40031094	Lce1k	Lce1k_Exon	-0.000218905	0.699667	-4.62417	4.344e-05	0.00975079	-3.59862
cg48215646_TC21	cg48215646	Usp9y	Usp9y_Promoter	-0.000279594	0.885042	-4.62386	4.34806e-05	0.00975249	-3.59954
cg38023434_BC21	cg38023434	Upf2	Upf2_Exon	-0.000226728	0.890345	-4.62117	4.38413e-05	0.00981299	-3.60769
rs255694468_BC11	rs255694468	Dach1	Dach1_Intron	0.000392573	0.117848	4.62113	4.38462e-05	0.00981299	-3.6078
cg43856255_TC21	cg43856255	Il17rc	Il17rc_Intron	-0.000247779	0.601717	-4.62111	4.38497e-05	0.00981299	-3.60788
cg28624626_BC21	cg28624626	Bicc1	Bicc1_Intron	-0.000549182	0.699745	-4.62019	4.39738e-05	0.00982652	-3.61066
cg44580011_TC21	cg44580011	1700015G11Rik	1700015G11Rik_Exon	-0.00063018	0.466277	-4.62017	4.39765e-05	0.00982652	-3.61072
cg40620912_TC21	cg40620912	Fam92a	Fam92a_Intergenic_upstream	-0.000325357	0.848723	-4.61985	4.40189e-05	0.00982857	-3.61167
cg45735570_BC11	cg45735570	Galntl6	Galntl6_Intron	-0.000988108	0.734457	-4.61814	4.4251e-05	0.00987294	-3.61686
cg28996827_BC21	cg28996827	1700010J16Rik	1700010J16Rik_Intron	-0.000475001	0.436703	-4.61688	4.4423e-05	0.00990386	-3.62068
cg34353232_BC21	cg34353232	Robo1	Robo1_Intron	-0.000681964	0.639499	-4.61629	4.45024e-05	0.00991409	-3.62244
cg41486866_BC21	cg41486866	Gm12992	Gm12992_Exon	-0.000695871	0.806994	-4.6149	4.46935e-05	0.00993786	-3.62667
cg29714922_BC21	cg29714922	Dlg4	Dlg4_Promoter	-0.000359508	0.63741	-4.61486	4.4699e-05	0.00993786	-3.62679
cg48016088_TC11	cg48016088	Sytl4	Sytl4_threeUTR	-0.000480232	0.85808	-4.61478	4.47098e-05	0.00993786	-3.62702
cg46091275_TC21	cg46091275	Ces2a	Ces2a_Exon	-0.000265452	0.626776	-4.61288	4.49715e-05	0.00998852	-3.63278
cg36220532_TC21	cg36220532	Zfand5	Zfand5_Intergenic_downstream	-0.000308619	0.876542	-4.61234	4.50452e-05	0.0099974	-3.63439
cg47958038_TC21	cg47958038	Tgif2lx2	Tgif2lx2_Intergenic_upstream	-0.000136842	0.494309	-4.6116	4.5148e-05	0.0100127	-3.63664
cg35053365_BC11	cg35053365	Uhrf1	Uhrf1_Intron	6.9545e-05	0.0304081	4.61076	4.52639e-05	0.0100128	-3.63917
cg35432128_TC21	cg35432128	Cables1	Cables1_Intergenic_upstream	-0.000234057	0.864617	-4.61056	4.52923e-05	0.0100128	-3.63978
cg36064450_TC21	cg36064450	Mrpl21	Mrpl21_Intron	-0.000321963	0.8435	-4.61052	4.52974e-05	0.0100128	-3.6399
cg42914347_BC21	cg42914347	Ache	Ache_Exon	-0.000303117	0.784224	-4.61045	4.5308e-05	0.0100128	-3.64012
cg35297618_BC21	cg35297618	Lrpprc	Lrpprc_Intergenic_upstream	-0.000728445	0.429129	-4.61038	4.53177e-05	0.0100128	-3.64034
cg44940071_BC21	cg44940071	Olfr597	Olfr597_threeUTR	-0.00040351	0.681394	-4.60994	4.53783e-05	0.0100188	-3.64165
cg48193570_TC21	cg48193570	Gm8817	Gm8817_Intergenic_downstream	-0.000366737	0.672368	-4.60961	4.54251e-05	0.0100216	-3.64267
cg38653422_TC21	cg38653422	Olfr1176	Olfr1176_Intron	-0.000222964	0.904442	-4.60862	4.55623e-05	0.0100277	-3.64564
cg44821893_TC21	cg44821893	Olfr307	Olfr307_Promoter	-0.000558034	0.508621	-4.60836	4.5599e-05	0.0100277	-3.64644
cg31517342_BC21	cg31517342	1700029N11Rik	1700029N11Rik_Intron	-0.000250571	0.900775	-4.60756	4.57105e-05	0.0100277	-3.64884
cg28447030_TC11	cg28447030	Grik2	Grik2_Intergenic_downstream	-0.000174379	0.720268	-4.60756	4.5711e-05	0.0100277	-3.64885
cg28143363_TC21	cg28143363	Ulbp1	Ulbp1_Exon	-0.000540428	0.551564	-4.60729	4.57495e-05	0.0100277	-3.64968
cg38219332_BC11	cg38219332	Mir3089	Mir3089_Promoter	-0.000228257	0.686971	-4.607	4.57896e-05	0.0100277	-3.65055
cg31747521_TC21	cg31747521	Zfp65	Zfp65_Intron	-0.000324212	0.671387	-4.607	4.57896e-05	0.0100277	-3.65055
rs254962283_TC11	rs254962283			-0.000379788	0.886145	-4.60698	4.57928e-05	0.0100277	-3.65062
cg47662958_BC21	cg47662958	Rbmx	Rbmx_threeUTR	-0.000496167	0.806178	-4.60696	4.57956e-05	0.0100277	-3.65068
cg41579682_TC21	cg41579682	Sh2d5	Sh2d5_Intron	-0.000296724	0.915299	-4.60662	4.58438e-05	0.0100277	-3.65171
cg37244987_BC21	cg37244987	Ankmy1	Ankmy1_Exon	-0.000326054	0.553779	-4.60651	4.58592e-05	0.0100277	-3.65204
ctl-Norm-C17-HSA_NN21				0.000409203	0.860165	4.60465	4.61207e-05	0.0100761	-3.65765
rs29276929_BC21	rs29276929			-0.000623204	0.804446	-4.60446	4.61484e-05	0.0100761	-3.65824
cg40929338_TC21	cg40929338	1700042G15Rik	1700042G15Rik_Promoter	-0.000273944	0.858883	-4.60291	4.63673e-05	0.0101164	-3.6629
cg41122240_TC21	cg41122240	Gm12610	Gm12610_Intron	-0.000278673	0.893479	-4.6024	4.64405e-05	0.0101236	-3.66446
cg43468694_TC11	cg43468694	Kbtbd2	Kbtbd2_Promoter	0.00018149	0.0460775	4.6022	4.64688e-05	0.0101236	-3.66506
cg40881926_TC21	cg40881926	Cylc2	Cylc2_Promoter	-0.000671654	0.756551	-4.60118	4.66142e-05	0.0101404	-3.66814
cg39532245_BC11	cg39532245	Trim55	Trim55_fiveUTR	0.00013774	0.0364444	4.60039	4.67268e-05	0.0101545	-3.67051
cg34305010_TC11	cg34305010	Epha3	Epha3_Intron	-0.000636918	0.773303	-4.60025	4.67475e-05	0.0101545	-3.67095
cg39027866_TC21	cg39027866	Tasp1	Tasp1_Exon	-0.000483054	0.767757	-4.59998	4.67867e-05	0.0101555	-3.67178
cg34323202_TC11	cg34323202	Cadm2	Cadm2_Intron	-0.000434064	0.864539	-4.59955	4.68483e-05	0.0101615	-3.67307
cg38511740_BC21	cg38511740	Myo3b	Myo3b_Intron	-0.000257892	0.683123	-4.59925	4.68916e-05	0.0101626	-3.67398
cg44197062_BC21	cg44197062	Zfp628	Zfp628_Promoter	-0.0004323	0.399738	-4.59884	4.69505e-05	0.0101626	-3.67522
cg47438404_BC21	cg47438404	Ssxb5	Ssxb5_Intergenic_downstream	-0.000404648	0.531425	-4.59786	4.70916e-05	0.0101784	-3.67818
cg43254374_BC21	cg43254374	Ahcyl2	Ahcyl2_Intron	-0.000560055	0.754297	-4.59781	4.70985e-05	0.0101784	-3.67832
cg39267769_TC21	cg39267769	Zmynd8	Zmynd8_Promoter	-0.000239939	0.78975	-4.59695	4.72236e-05	0.0101974	-3.68094
cg31731291_BC11	cg31731291	Spata31	Spata31_Promoter	-0.00055669	0.657246	-4.59673	4.72549e-05	0.0101974	-3.68159
cg31126524_TC21	cg31126524	3110009F21Rik	3110009F21Rik_Exon	-0.000175318	0.941979	-4.59644	4.72962e-05	0.0101988	-3.68245
cg37681088_BC11	cg37681088	Rabgap1l	Rabgap1l_Intron	-0.000151737	0.940639	-4.596	4.73611e-05	0.0101989	-3.6838
cg31120321_BC21	cg31120321	Mir3070b	Mir3070b_Promoter	-0.000314827	0.467296	-4.59597	4.73656e-05	0.0101989	-3.68389
cg35900244_BC21	cg35900244	Dcc	Dcc_Intron	-0.000230394	0.912293	-4.59483	4.75313e-05	0.0102228	-3.68733
cg31285589_TC21	cg31285589	Arid4b	Arid4b_Intron	-0.000727264	0.710278	-4.59473	4.75454e-05	0.0102228	-3.68763
cg39744244_BC21	cg39744244	Maml3	Maml3_Intron	-0.000213193	0.919796	-4.5944	4.7594e-05	0.0102258	-3.68863
cg34690358_TC21	cg34690358	Lnpep	Lnpep_Intergenic_upstream	-0.000867562	0.30375	-4.59271	4.78409e-05	0.0102714	-3.69373
cg48010320_BC21	cg48010320	Pcdh19	Pcdh19_Intergenic_downstream	-0.000220234	0.888198	-4.59106	4.80834e-05	0.0103085	-3.69872
cg31338600_TC21	cg31338600	Vmn1r198	Vmn1r198_Promoter	-0.00043469	0.678856	-4.59045	4.81731e-05	0.0103203	-3.70055
cg41707668_TC21	cg41707668	Slc25a33	Slc25a33_Exon	0.000395821	0.342199	4.58986	4.8261e-05	0.0103316	-3.70235
ctl-Negative-235-HSA_NN21				-0.000185326	0.502994	-4.58941	4.83276e-05	0.0103344	-3.70371
cg29518559_BC21	cg29518559	Prop1	Prop1_Promoter	-0.000279412	0.931931	-4.58922	4.83559e-05	0.0103344	-3.70428
cg47498154_BC21	cg47498154	Dipk2b	Dipk2b_Intergenic_upstream	-0.000593024	0.734738	-4.58906	4.83787e-05	0.0103344	-3.70475
cg31513547_TC21	cg31513547	Gm5083	Gm5083_Exon	-0.000196461	0.903365	-4.58813	4.85166e-05	0.0103564	-3.70755
cg31030536_TC11	cg31030536	Atxn3	Atxn3_Intron	-0.000229138	0.922737	-4.58771	4.85793e-05	0.0103565	-3.70882
cg48156677_BC11	cg48156677	Phka2	Phka2_Exon	-0.000529498	0.823923	-4.58766	4.85872e-05	0.0103565	-3.70898
cg29903878_BC21	cg29903878	Msi2	Msi2_Exon	-0.000291501	0.883612	-4.5863	4.87907e-05	0.0103887	-3.7131
ctl-NP-RPS6KB1-18570-GC-2_BO21				-0.000142399	0.933861	-4.58618	4.88082e-05	0.0103887	-3.71346
rs264283936_TC11	rs264283936	Cntnap5a	Cntnap5a_Intron	0.000157127	0.0654958	4.58474	4.90236e-05	0.010427	-3.71779
cg28377802_BC21	cg28377802	Cdk19	Cdk19_Intron	-0.000121699	0.935159	-4.5814	4.95288e-05	0.0105269	-3.7279
cg36460434_BC21	cg36460434	Sufu	Sufu_Intron	-0.000272504	0.891207	-4.58081	4.96175e-05	0.0105306	-3.72966
cg46228266_BC21	cg46228266	Pkd1l2	Pkd1l2_Promoter	-0.00042364	0.618934	-4.58056	4.96561e-05	0.0105313	-3.73042
cg43121056_TC21	cg43121056	Asns	Asns_Intergenic_upstream	-0.000387602	0.734694	-4.58028	4.96981e-05	0.0105327	-3.73126
cg36088224_TC21	cg36088224	Pacs1	Pacs1_Exon	-0.000394831	0.58545	-4.57935	4.98405e-05	0.0105508	-3.73408
cg38632092_TC21	cg38632092	Calcrl	Calcrl_Intron	-0.000234338	0.922736	-4.57912	4.9875e-05	0.0105508	-3.73476
cg48214537_BC21	cg48214537	Uty	Uty_Intron	-0.000597679	0.801503	-4.57902	4.98906e-05	0.0105508	-3.73507
cg47788336_TC21	cg47788336	Dmd	Dmd_Intron	-0.000745021	0.687921	-4.57867	4.99436e-05	0.0105527	-3.73611
cg37318633_BC21	cg37318633	Vps4b	Vps4b_fiveUTR	0.000241786	0.20637	4.57819	5.00184e-05	0.0105527	-3.73759
cg46931332_TC21	cg46931332	Adam10	Adam10_Intron	-0.000155555	0.915197	-4.57804	5.00415e-05	0.0105527	-3.73804
cg46809723_BC11	cg46809723	Rec114	Rec114_Exon	-0.000136877	0.972542	-4.57797	5.00508e-05	0.0105527	-3.73822
cg28853461_TC22	cg28853461	Ccdc38	Ccdc38_threeUTR	-0.000454107	0.797116	-4.5778	5.00779e-05	0.0105527	-3.73876
cg44844814_TC22	cg44844814	Dlg2	Dlg2_Exon	-0.000404652	0.561222	-4.57609	5.03398e-05	0.010588	-3.7439
cg48142023_TC21	cg48142023	Cnksr2	Cnksr2_Intron	-0.000752522	0.575091	-4.57601	5.03524e-05	0.010588	-3.74414
cg47709781_TC21	cg47709781	Mir509	Mir509_Intergenic_upstream	-0.000453023	0.766032	-4.57566	5.04065e-05	0.0105918	-3.7452
cg48151643_TC21	cg48151643	Sh3kbp1	Sh3kbp1_Intron	-0.000213769	0.919186	-4.57521	5.04767e-05	0.0105932	-3.74657
cg36624169_TC21	cg36624169	Pcmtd1	Pcmtd1_Intergenic_upstream	-0.000289662	0.655083	-4.57501	5.05076e-05	0.0105932	-3.74717
cg39188567_TC21	cg39188567	Arhgap40	Arhgap40_Intron	-0.000250794	0.872137	-4.57492	5.05207e-05	0.0105932	-3.74743
cg38159062_BC21	cg38159062	Lcn8	Lcn8_Promoter	-0.000271615	0.675123	-4.57373	5.07066e-05	0.0106155	-3.75105
cg36668106_BC21	cg36668106	Eya1	Eya1_Intergenic_downstream	-0.00037745	0.737235	-4.57338	5.07603e-05	0.0106155	-3.75209
cg47354169_TC11	cg47354169	Acvr2b	Acvr2b_Exon	-0.000358769	0.871908	-4.57332	5.07702e-05	0.0106155	-3.75228
cg40006137_BC11	cg40006137	Adam15	Adam15_Promoter	0.000162914	0.0424774	4.57244	5.09066e-05	0.0106305	-3.75493
cg40795983_TC21	cg40795983	Il11ra1	Il11ra1_Exon	-0.000209216	0.825242	-4.5723	5.09288e-05	0.0106305	-3.75535
cg40636542_BC21	cg40636542	Gm11837	Gm11837_Promoter	0.00023373	0.0731304	4.57216	5.09497e-05	0.0106305	-3.75576
cg28884913_TC21	cg28884913	4930459C07Rik	4930459C07Rik_Exon	-0.000318756	0.869045	-4.57088	5.11503e-05	0.0106648	-3.75963
cg33725135_BC21	cg33725135	Irak4	Irak4_Intron	-0.000292178	0.550288	-4.57041	5.12247e-05	0.0106728	-3.76106
cg46475333_TC21	cg46475333	Olfr857	Olfr857_Intergenic_upstream	-0.000382877	0.605593	-4.5701	5.12729e-05	0.0106754	-3.76199
cg37793580_TC21	cg37793580	Olfr418	Olfr418_Exon	-0.000538131	0.649841	-4.56934	5.13917e-05	0.0106926	-3.76427
cg36886150_TC21	cg36886150	Col3a1	Col3a1_Exon	-0.000340102	0.588702	-4.56892	5.14576e-05	0.0106988	-3.76553
cg43029926_BC21	cg43029926	Polr1d	Polr1d_Exon	-0.000563469	0.55625	-4.56853	5.15196e-05	0.0106993	-3.76672
cg44612222_TC21	cg44612222	Ube3a	Ube3a_Exon	-0.000642897	0.811157	-4.56845	5.15326e-05	0.0106993	-3.76696
ctl-BS-TAPBP-CA-R-6680_TC21				-0.000370177	0.802885	-4.56757	5.16717e-05	0.0107011	-3.76962
cg47839005_TC21	cg47839005	Arhgef9	Arhgef9_Exon	-0.000216643	0.90535	-4.56741	5.1696e-05	0.0107011	-3.77008
cg36638667_BC21	cg36638667	Sgk3	Sgk3_Promoter	-0.000414386	0.460236	-4.56726	5.17209e-05	0.0107011	-3.77056
cg44371906_TC11	cg44371906	Actn4	Actn4_Intron	-0.0010546	0.662404	-4.56725	5.17217e-05	0.0107011	-3.77057
cg47717828_BC11	cg47717828	1700111N16Rik	1700111N16Rik_Intron	-0.000593592	0.747479	-4.56547	5.20046e-05	0.0107401	-3.77594
cg37750402_TC21	cg37750402	Mir6348	Mir6348_Exon	-0.000195586	0.896657	-4.56541	5.20143e-05	0.0107401	-3.77613
cg30667641_BC21	cg30667641	Psma6	Psma6_Intron	-0.000516937	0.692289	-4.56538	5.2019e-05	0.0107401	-3.77622
cg34937701_TC21	cg34937701	Clic5	Clic5_Intergenic_upstream	-0.000248109	0.806491	-4.56482	5.21082e-05	0.0107448	-3.7779
cg48203302_TC21	cg48203302	Arhgap6	Arhgap6_Intron	-0.000487052	0.829174	-4.56478	5.21143e-05	0.0107448	-3.77802
cg13684553_TC21	cg13684553	Wdr20	Wdr20_fiveUTR	0.000198551	0.145136	4.55965	5.29392e-05	0.0108921	-3.79349
cg44210085_TC11	cg44210085	Olfr1349	Olfr1349_Exon	-0.000300318	0.785203	-4.559	5.30457e-05	0.0109011	-3.79546
cg48222666_BC11	cg48222666	Gm3376	Gm3376_Intergenic_downstream	-8.46204e-05	0.96541	-4.55893	5.30565e-05	0.0109011	-3.79567
cg29440746_BC21	cg29440746	Mat2b	Mat2b_threeUTR	-0.000203939	0.860672	-4.55845	5.31351e-05	0.0109096	-3.79712
rs30984204_BC11	rs30984204	Ints9	Ints9_Intron	0.000170477	0.0817569	4.55801	5.32063e-05	0.0109167	-3.79844
cg40923010_TC21	cg40923010	Tmem245	Tmem245_Intron	-0.000425315	0.757181	-4.55751	5.32868e-05	0.0109167	-3.79993
cg33237104_BC11	cg33237104	Rnf19a	Rnf19a_Exon	-0.00012772	0.947859	-4.55721	5.33373e-05	0.0109167	-3.80086
ctl-BS-CCND3-CT-R-62417_TO11				-0.000247521	0.677608	-4.55676	5.34102e-05	0.0109167	-3.80221
cg38656776_BC11	cg38656776	Olfr1225	Olfr1225_fiveUTR	0.0007434	0.31574	4.55667	5.34245e-05	0.0109167	-3.80247
cg42557942_BC21	cg42557942	Dr1	Dr1_Exon	-0.000290661	0.888395	-4.55666	5.34265e-05	0.0109167	-3.80251
cg48213351_BC11	cg48213351	Eif2s3y	Eif2s3y_Intergenic_upstream	-0.000343457	0.439468	-4.55665	5.34275e-05	0.0109167	-3.80253
cg32490491_BC21	cg32490491	Dad1	Dad1_Intergenic_downstream	-0.000520982	0.728101	-4.55609	5.35193e-05	0.0109279	-3.80422
cg44996507_TC11	cg44996507	Usp47	Usp47_Intron	-0.000512995	0.860134	-4.55464	5.37583e-05	0.0109691	-3.80861
cg39588483_TC21	cg39588483	Gm1527	Gm1527_Exon	-0.000559175	0.674723	-4.55408	5.38505e-05	0.0109804	-3.81029
cg48173040_BC21	cg48173040	Grpr	Grpr_Intergenic_downstream	-0.000301753	0.884301	-4.55351	5.39436e-05	0.0109918	-3.81199
cg42649917_BC21	cg42649917	Gcn1	Gcn1_Intron	-0.000235858	0.807207	-4.55237	5.41318e-05	0.0110088	-3.81542
cg48222168_TC11	cg48222168	Gm3376	Gm3376_Intergenic_downstream	-0.000765273	0.267109	-4.55198	5.41967e-05	0.0110088	-3.8166
cg41801722_BC21	cg41801722	Agrn	Agrn_Intergenic_downstream	-0.000222166	0.820591	-4.55188	5.4214e-05	0.0110088	-3.81692
cg44278000_TC21	cg44278000	Psg28	Psg28_Intron	-0.000219896	0.719673	-4.55178	5.42295e-05	0.0110088	-3.8172
cg45135201_BC21	cg45135201	Zfp629	Zfp629_Exon	-0.000264323	0.904781	-4.55166	5.42501e-05	0.0110088	-3.81757
cg38295415_TC21	cg38295415	Strbp	Strbp_threeUTR	-0.000218633	0.890568	-4.55099	5.43621e-05	0.0110159	-3.8196
cg47792373_BC11	cg47792373	Dmd	Dmd_Intron	-0.000384108	0.872087	-4.55078	5.43968e-05	0.0110159	-3.82023
cg32747995_BC21	cg32747995	Gm32455	Gm32455_Intergenic_downstream	-0.000449107	0.847886	-4.5497	5.45769e-05	0.0110448	-3.82349
cg47910103_TC21	cg47910103	Cysltr1	Cysltr1_Intergenic_downstream	-0.000353355	0.664313	-4.54887	5.47148e-05	0.0110652	-3.82597
cg37825501_TC11	cg37825501	Catspere2	Catspere2_Intron	-0.000146102	0.940052	-4.54844	5.47865e-05	0.0110702	-3.82726
cg47495917_BC11	cg47495917	Kdm6a	Kdm6a_Exon	-0.000389588	0.89455	-4.54824	5.48203e-05	0.0110702	-3.82787
cg29723134_BC21	cg29723134	Chrne	Chrne_Promoter	-0.000341993	0.767059	-4.54738	5.49654e-05	0.0110702	-3.83047
cg43859628_TC11	cg43859628	Ghrl	Ghrl_Promoter	-0.000139577	0.938816	-4.54729	5.49796e-05	0.0110702	-3.83073
cg32231394_TC21	cg32231394	Gm5458	Gm5458_Intergenic_downstream	-0.000293726	0.621949	-4.54722	5.49918e-05	0.0110702	-3.83095
cg37689905_TC21	cg37689905	Suco	Suco_Intron	-0.000400799	0.839615	-4.5471	5.5012e-05	0.0110702	-3.83131
cg38250838_BC21	cg38250838	Fam129b	Fam129b_Promoter	-0.000208682	0.910938	-4.54705	5.50202e-05	0.0110702	-3.83145
cg34613013_BC21	cg34613013	Sft2d1	Sft2d1_Intron	-0.000296188	0.305283	-4.54676	5.50698e-05	0.0110702	-3.83234
cg45612886_BC11	cg45612886	Slc7a2	Slc7a2_Intron	-0.000282669	0.897505	-4.54613	5.51766e-05	0.0110702	-3.83425
cg30547118_BC21	cg30547118	9130015A21Rik	9130015A21Rik_Promoter	-0.000243554	0.898143	-4.54605	5.51885e-05	0.0110702	-3.83446
cg40420001_BC21	cg40420001	Pdlim5	Pdlim5_Intron	-0.00030529	0.501144	-4.54539	5.53011e-05	0.0110853	-3.83647
cg36895676_TC11	cg36895676	Slc39a10	Slc39a10_Intergenic_upstream	-0.00058749	0.784293	-4.54503	5.53625e-05	0.0110898	-3.83756
cg33312753_BC11	cg33312753	Csmd3	Csmd3_Intron	-0.00103913	0.72849	-4.5447	5.54183e-05	0.0110898	-3.83855
cg43058766_TC21	cg43058766	Uspl1	Uspl1_fiveUTR	-0.000222981	0.902474	-4.54459	5.5436e-05	0.0110898	-3.83887
cg32566979_TC21	cg32566979	Dleu2	Dleu2_Exon	-0.000221185	0.893639	-4.54257	5.57802e-05	0.011127	-3.84496
cg36160720_TC21	cg36160720	Olfr1425	Olfr1425_Promoter	-0.000371037	0.862218	-4.54249	5.57936e-05	0.011127	-3.8452
cg46265672_BC21	cg46265672	Usp10	Usp10_Exon	-0.000387174	0.847574	-4.54236	5.58153e-05	0.011127	-3.84558
cg43010904_BC11	cg43010904	Cpsf4	Cpsf4_fiveUTR	0.000167352	0.0384882	4.54231	5.5824e-05	0.011127	-3.84573
cg39529929_BC21	cg39529929	Pde7a	Pde7a_Intron	-0.000485113	0.665451	-4.54218	5.58473e-05	0.011127	-3.84614
cg44009016_BC21	cg44009016	Klrb1b	Klrb1b_Intergenic_upstream	-0.000273365	0.645132	-4.54195	5.5886e-05	0.0111272	-3.84683
cg32799219_TC21	cg32799219	Pcdh9	Pcdh9_Intron	-0.000574024	0.653988	-4.54154	5.5956e-05	0.0111337	-3.84806
ctl-BS-RAB1A-CT-R-9881_BC21				-0.000150816	0.920909	-4.54108	5.6034e-05	0.0111338	-3.84943
cg41888788_TC21	cg41888788	Gnai1	Gnai1_Intron	-0.00034665	0.726666	-4.54091	5.60642e-05	0.0111338	-3.84996
cg42015368_TC21	cg42015368	Letm1	Letm1_Exon	-0.0003635	0.688428	-4.54088	5.60694e-05	0.0111338	-3.85005
cg32011828_TC21	cg32011828	Erbin	Erbin_Intron	-0.000462699	0.814585	-4.5394	5.63231e-05	0.0111542	-3.8545
cg32775637_BC11	cg32775637	Tdrd3	Tdrd3_Intergenic_downstream	-0.000427396	0.806649	-4.53939	5.63249e-05	0.0111542	-3.85453
cg30926394_BC21	cg30926394	Irf2bpl	Irf2bpl_Intergenic_downstream	-0.00033805	0.340736	-4.53937	5.63282e-05	0.0111542	-3.85459
cg45309271_BC21	cg45309271	Tpcn2	Tpcn2_threeUTR	-0.000276	0.772822	-4.53918	5.63606e-05	0.0111542	-3.85515
cg34598315_TC21	cg34598315	Ezr	Ezr_Intergenic_upstream	-0.000278154	0.380184	-4.53776	5.66061e-05	0.0111953	-3.85943
cg33536785_BC21	cg33536785	C1qtnf6	C1qtnf6_Promoter	-0.000479261	0.548783	-4.53751	5.66502e-05	0.0111965	-3.8602
cg45197223_BC21	cg45197223	Edrf1	Edrf1_Exon	-0.000267164	0.916466	-4.53666	5.67979e-05	0.0112162	-3.86276
cg41248274_BC11	cg41248274	Cyb5rl	Cyb5rl_fiveUTR	-0.000225459	0.929318	-4.5362	5.68773e-05	0.0112162	-3.86414
cg28893946_BC11	cg28893946	Gm10754	Gm10754_Exon	-0.000440411	0.679497	-4.53613	5.68889e-05	0.0112162	-3.86434
cg30044917_TC21	cg30044917	Retreg3	Retreg3_Intron	-0.000379181	0.656564	-4.53606	5.69014e-05	0.0112162	-3.86455
cg38294127_BC21	cg38294127	Rc3h2	Rc3h2_Exon	-0.000202459	0.90487	-4.53461	5.71547e-05	0.0112433	-3.86893
cg47804025_BC21	cg47804025	Il1rapl1	Il1rapl1_Intron	-0.000581277	0.633409	-4.5341	5.7243e-05	0.0112433	-3.87044
cg39310112_BC21	cg39310112	Atp9a	Atp9a_Intron	-0.000165556	0.913794	-4.53405	5.72521e-05	0.0112433	-3.8706
cg47807727_BC21	cg47807727	Mir1906-1	Mir1906-1_Exon	-0.000497344	0.820604	-4.53404	5.72541e-05	0.0112433	-3.87064
cg44413960_TC21	cg44413960	Scgb2b23-ps	Scgb2b23-ps_Intron	-0.000361133	0.407669	-4.53397	5.72666e-05	0.0112433	-3.87085
cg44291304_BC21	cg44291304	Exoc3l2	Exoc3l2_Exon	-0.000362857	0.563224	-4.53294	5.74472e-05	0.0112713	-3.87395
cg48220260_BC21	cg48220260	H2al2b	H2al2b_Intergenic_upstream	-0.000563822	0.682126	-4.53106	5.77778e-05	0.0113212	-3.8796
cg43042124_BC11	cg43042124	Mtus2	Mtus2_fiveUTR	0.000179804	0.0533925	4.53053	5.7871e-05	0.0113319	-3.88119
cg38655554_TC21	cg38655554	Olfr1204	Olfr1204_Exon	-0.00031565	0.696796	-4.52992	5.79802e-05	0.0113458	-3.88304
cg47930761_TC21	cg47930761	Hdx	Hdx_threeUTR	-0.0004876	0.706708	-4.52955	5.80453e-05	0.011351	-3.88414
cg37970649_TC21	cg37970649	Lpgat1	Lpgat1_Promoter	-0.000573057	0.475043	-4.52866	5.82034e-05	0.0113744	-3.88682
cg38656889_BC11	cg38656889	Olfr1226	Olfr1226_Promoter	-0.00036018	0.87864	-4.52835	5.82582e-05	0.0113776	-3.88775
cg47121368_BC21	cg47121368	C430002N11Rik	C430002N11Rik_Intergenic_downstream	-0.000316991	0.770793	-4.52736	5.84356e-05	0.0114048	-3.89074
cg29634921_BC21	cg29634921	Ncor1	Ncor1_Exon	-0.000162783	0.929795	-4.52649	5.85908e-05	0.0114275	-3.89335
cg28230727_BC11	cg28230727	Gm20139	Gm20139_Promoter	-0.000450294	0.872846	-4.52609	5.86615e-05	0.0114338	-3.89454
cg37047828_BC21	cg37047828	Ikzf2	Ikzf2_Exon	-0.000225225	0.912875	-4.52568	5.87356e-05	0.0114407	-3.89578
cg30376905_BC21	cg30376905	4921511I17Rik	4921511I17Rik_Intergenic_upstream	-0.000218545	0.584374	-4.52534	5.87976e-05	0.0114452	-3.89682
cg47159873_BC21	cg47159873	Stag1	Stag1_threeUTR	-0.000429174	0.834501	-4.52345	5.91383e-05	0.0114965	-3.90251
cg38595872_TC21	cg38595872	Gm14461	Gm14461_Intergenic_downstream	-0.000411457	0.847587	-4.52344	5.91386e-05	0.0114965	-3.90251
cg48219839_BC21	cg48219839	H2al2b	H2al2b_Intergenic_upstream	-0.000314666	0.878426	-4.523	5.92192e-05	0.011501	-3.90385
cg47613837_BC21	cg47613837	Zfp280c	Zfp280c_Intron	-0.000446949	0.846163	-4.52289	5.92393e-05	0.011501	-3.90419
cg34604505_TC21	cg34604505	Tcp10a	Tcp10a_Intron	-0.000432929	0.661611	-4.52213	5.9376e-05	0.01152	-3.90645
ctl-BS-EIF3C-CT-R-18080_TC21				-0.000179617	0.91435	-4.52131	5.9525e-05	0.0115368	-3.90892
cg33221627_BC21	cg33221627	Mtdh	Mtdh_Intron	-0.0001638	0.935053	-4.52123	5.95409e-05	0.0115368	-3.90918
cg31647134_TC21	cg31647134	Macroh2a1	Macroh2a1_Promoter	9.62169e-05	0.0421254	4.51979	5.98032e-05	0.0115801	-3.91351
cg48215444_TC11	cg48215444	Usp9y	Usp9y_Intron	-0.000442002	0.587143	-4.51919	5.99129e-05	0.0115933	-3.91531
cg34885617_TC21	cg34885617	Mdc1	Mdc1_Exon	-0.00024005	0.748969	-4.51868	6.0005e-05	0.0115933	-3.91682
cg48025640_TO21	cg48025640	AV320801	AV320801_Promoter	-0.00032061	0.759845	-4.51861	6.00192e-05	0.0115933	-3.91706
cg33216736_BC21	cg33216736	Cpq	Cpq_Intron	-0.000262305	0.926359	-4.51846	6.00468e-05	0.0115933	-3.91751
cg48084213_BC21	cg48084213	Lhfpl1	Lhfpl1_Intron	-0.00034799	0.863413	-4.51834	6.00673e-05	0.0115933	-3.91785
cg47802291_BC21	cg47802291	Il1rapl1	Il1rapl1_Intron	-0.000496389	0.820289	-4.51774	6.01776e-05	0.0116023	-3.91965
cg36985392_BC21	cg36985392	Abi2	Abi2_Exon	-0.000167362	0.94259	-4.51745	6.02308e-05	0.0116023	-3.92052
cg45137900_BC21	cg45137900	Setd1a	Setd1a_Intron	-0.000304505	0.800573	-4.51745	6.02315e-05	0.0116023	-3.92053
cg30453784_TC21	cg30453784	2410018L13Rik	2410018L13Rik_Intron	-0.000285586	0.791526	-4.51667	6.03748e-05	0.0116223	-3.92287
cg38647645_TC21	cg38647645	Olfr1099	Olfr1099_Promoter	-0.000658807	0.620226	-4.51595	6.05075e-05	0.0116329	-3.92503
cg48035011_TC21	cg48035011	BC065397	BC065397_Intron	-0.000345735	0.865239	-4.51589	6.052e-05	0.0116329	-3.92524
cg35467072_TC21	cg35467072	Chst9	Chst9_Intron	-0.000142371	0.472667	-4.51574	6.05473e-05	0.0116329	-3.92568
cg36379162_BC21	cg36379162	Cyp2c67	Cyp2c67_Intron	-0.000309087	0.820132	-4.51547	6.05965e-05	0.0116348	-3.92648
cg46595060_TC11	cg46595060	St3gal4	St3gal4_Intron	-0.000555207	0.403413	-4.5141	6.08503e-05	0.0116759	-3.93059
cg42477633_TC21	cg42477633	Sec31a	Sec31a_Intron	-0.000343264	0.495636	-4.51317	6.10249e-05	0.0116909	-3.93341
cg45790862_BC21	cg45790862	Psd3	Psd3_Intron	-0.000738982	0.708842	-4.51302	6.10528e-05	0.0116909	-3.93386
cg47908284_BC21	cg47908284	Taf9b	Taf9b_Promoter	-0.00038139	0.882269	-4.51276	6.11001e-05	0.0116909	-3.93462
cg40015093_TC21	cg40015093	Ubap2l	Ubap2l_Intron	-0.000163138	0.922443	-4.51263	6.11243e-05	0.0116909	-3.93501
cg33133531_TC21	cg33133531	Cdh12	Cdh12_Intron	-0.000405093	0.695468	-4.5126	6.11296e-05	0.0116909	-3.9351
cg47097151_BC21	cg47097151	Dipk2a	Dipk2a_Intergenic_downstream	-0.000365906	0.851534	-4.51241	6.11653e-05	0.0116909	-3.93567
cg44744366_TC11	cg44744366	Agbl1	Agbl1_Intron	-0.00013117	0.94784	-4.51073	6.1481e-05	0.0117319	-3.94074
cg43093973_BC11	cg43093973	Col1a2	Col1a2_Intergenic_downstream	-0.000323221	0.888789	-4.51063	6.14986e-05	0.0117319	-3.94102
ctl-BS-RPS6KA5-CT-R-15239_BC21				-0.000243804	0.923051	-4.51009	6.16007e-05	0.0117379	-3.94265
cg35477416_BC21	cg35477416	4930545E07Rik	4930545E07Rik_Exon	-0.000798513	0.750482	-4.51005	6.16093e-05	0.0117379	-3.94279
cg47602958_BC21	cg47602958	Actrt1	Actrt1_Intergenic_downstream	-0.000235482	0.914317	-4.50911	6.17855e-05	0.0117639	-3.9456
cg47720822_TC21	cg47720822	Gm14725	Gm14725_Intergenic_downstream	-0.000167659	0.925283	-4.50879	6.18454e-05	0.0117677	-3.94655
cg34467328_BC21	cg34467328	Tiam1	Tiam1_Intron	-0.000256781	0.857963	-4.50797	6.20004e-05	0.0117888	-3.94902
cg48247159_BC11	cg48247159	Gm20815	Gm20815_Intergenic_upstream	-0.000385731	0.465752	-4.50764	6.2063e-05	0.0117888	-3.95001
cg33536960_BC21	cg33536960	Sstr3	Sstr3_Intron	-0.000300259	0.692618	-4.50532	6.25052e-05	0.0118628	-3.95699
cg29325559_TC21	cg29325559	Usp34	Usp34_threeUTR	-0.000211374	0.91106	-4.50482	6.25992e-05	0.011873	-3.95847
cg31850557_TC21	cg31850557	Mef2c	Mef2c_Intergenic_upstream	-0.000323222	0.871564	-4.5038	6.27959e-05	0.0119027	-3.96156
rs222735508_BC12	rs222735508	Adcyap1	Adcyap1_Intergenic_downstream	0.000214108	0.0752206	4.50356	6.2842e-05	0.0119038	-3.96228
cg48215193_TC21	cg48215193	Usp9y	Usp9y_Exon	-0.000272483	0.910112	-4.50102	6.33315e-05	0.0119888	-3.96992
cg44157033_TC21	cg44157033	Ints13	Ints13_Intron	-0.000236817	0.89766	-4.50001	6.35255e-05	0.0120179	-3.97292
cg32783828_TC22	cg32783828	4930474H20Rik	4930474H20Rik_Intergenic_upstream	-0.00070792	0.758366	-4.49973	6.35801e-05	0.0120205	-3.97377
cg39167827_TC21	cg39167827	Tgif2	Tgif2_Intergenic_upstream	-0.000484091	0.793803	-4.49897	6.3729e-05	0.012041	-3.97607
cg34386998_BC21	cg34386998	Mir99ahg	Mir99ahg_Intron	-0.000337783	0.877406	-4.49807	6.39042e-05	0.0120664	-3.97877
ctl-BS-RPS6KA3-CT-R-89880_TC21				0.000704596	0.220518	4.4974	6.40341e-05	0.0120832	-3.98077
cg48213655_TC21	cg48213655	Eif2s3y	Eif2s3y_Intron	-0.000709755	0.735705	-4.49644	6.42219e-05	0.0121109	-3.98365
cg38522332_BC21	cg38522332	Slc25a12	Slc25a12_Exon	-0.000238057	0.711392	-4.49588	6.43314e-05	0.0121165	-3.98533
cg37061050_BC21	cg37061050	Apol7d	Apol7d_Intergenic_downstream	-0.000225223	0.877265	-4.49574	6.43585e-05	0.0121165	-3.98574
cg35257096_TC11	cg35257096	Cdkl4	Cdkl4_Intron	-0.000198437	0.841999	-4.49557	6.43927e-05	0.0121165	-3.98626
cg32785409_BC21	cg32785409	4930474H20Rik	4930474H20Rik_Exon	-0.000431999	0.861515	-4.49546	6.44148e-05	0.0121165	-3.9866
cg31220765_TC21	cg31220765	Net1	Net1_Exon	-0.000482104	0.875233	-4.49364	6.47722e-05	0.0121759	-3.99204
cg47549585_BC21	cg47549585	Dock11	Dock11_Exon	-0.000311356	0.861829	-4.49153	6.51912e-05	0.0122355	-3.99839
cg45745918_TC11	cg45745918	Mfap3l	Mfap3l_Exon	-0.000458036	0.782757	-4.49148	6.52006e-05	0.0122355	-3.99853
rs36334732_BC12	rs36334732	Tinag	Tinag_Intergenic_upstream	0.000363942	0.12618	4.49123	6.52518e-05	0.0122355	-3.9993
cg48121458_BC21	cg48121458	Ubqln2	Ubqln2_Intergenic_downstream	-0.000393634	0.852348	-4.49107	6.52838e-05	0.0122355	-3.99978
cg33578680_TC21	cg33578680	Rbx1	Rbx1_Intergenic_downstream	-0.000316296	0.706215	-4.49088	6.53203e-05	0.0122355	-4.00033
cg37325552_TC21	cg37325552	D830032E09Rik	D830032E09Rik_Intergenic_downstream	-0.000380071	0.270128	-4.4908	6.53372e-05	0.0122355	-4.00059
cg48051074_BC21	cg48051074	Ripply1	Ripply1_Promoter	-0.000366216	0.865149	-4.49004	6.54892e-05	0.0122437	-4.00287
cg42322379_TC21	cg42322379	C530008M17Rik	C530008M17Rik_Intron	-0.000216205	0.864284	-4.48976	6.55448e-05	0.0122437	-4.00371
cg39653684_BC21	cg39653684	4932438A13Rik	4932438A13Rik_Intron	-0.00055541	0.835781	-4.48975	6.55461e-05	0.0122437	-4.00373
cg46499965_BC11	cg46499965	Swsap1	Swsap1_Promoter	0.000269639	0.0722874	4.48893	6.57109e-05	0.0122667	-4.0062
cg47915372_BC21	cg47915372	Tent5d	Tent5d_Intergenic_upstream	-0.00078275	0.708217	-4.48817	6.58624e-05	0.0122873	-4.00846
cg38150650_BC21	cg38150650	Nsmf	Nsmf_threeUTR	-0.000295907	0.903555	-4.48775	6.59477e-05	0.0122877	-4.00974
cg45164357_BC21	cg45164357	Fgfr2	Fgfr2_Exon	-0.000217791	0.905974	-4.48716	6.6067e-05	0.0123006	-4.01151
cg48213584_BC11	cg48213584	Eif2s3y	Eif2s3y_Promoter	0.000553377	0.3533	4.48699	6.61001e-05	0.0123006	-4.01201
cg28230416_BC21	cg28230416	Gm20139	Gm20139_Exon	-0.000448265	0.718743	-4.4866	6.618e-05	0.0123053	-4.01319
cg43968806_TC21	cg43968806	Iffo1	Iffo1_Intron	-0.000214515	0.89021	-4.48646	6.62083e-05	0.0123053	-4.01362
cg34010047_BC21	cg34010047	Kng2	Kng2_Intron	-0.000293526	0.813969	-4.48619	6.6263e-05	0.0123077	-4.01443
cg46826887_TC21	cg46826887	9230112J17Rik	9230112J17Rik_Exon	-0.000255317	0.912144	-4.48442	6.66209e-05	0.0123664	-4.01973
cg47994991_BC21	cg47994991	4930558G05Rik	4930558G05Rik_Intergenic_upstream	-0.000586638	0.21425	-4.48372	6.67631e-05	0.0123851	-4.02182
cg42061219_TC11	cg42061219	Zbtb49	Zbtb49_fiveUTR	0.000118105	0.0217092	4.48289	6.69332e-05	0.0123955	-4.02433
cg46616649_TC21	cg46616649	Olfr898	Olfr898_Promoter	-0.000235462	0.896667	-4.48283	6.69449e-05	0.0123955	-4.0245
cg42756953_TC21	cg42756953	Psmd9	Psmd9_Intron	-0.000378985	0.60195	-4.48229	6.70548e-05	0.0124076	-4.02611
cg47159453_TC11	cg47159453	Stag1	Stag1_Intron	-0.000713363	0.72377	-4.4821	6.70944e-05	0.0124076	-4.02669
cg30821815_BC21	cg30821815	Plekhg3	Plekhg3_Promoter	-0.000262143	0.869801	-4.4815	6.72166e-05	0.0124225	-4.02848
cg48223194_BC21	cg48223194	Gm3376	Gm3376_Intergenic_downstream	-0.000365794	0.865206	-4.47917	6.76968e-05	0.0124956	-4.03548
cg28785004_BC21	cg28785004	Pwp1	Pwp1_Intron	-0.000431135	0.362224	-4.47864	6.78046e-05	0.0125077	-4.03705
cg47512806_TC21	cg47512806	Slc6a14	Slc6a14_Intergenic_upstream	-0.000624021	0.736906	-4.47824	6.7888e-05	0.0125153	-4.03826
cg40212004_BC11	cg40212004	Dph5	Dph5_Intergenic_upstream	-0.000160743	0.947414	-4.47714	6.81168e-05	0.0125351	-4.04156
cg42252930_TC21	cg42252930	Grxcr1	Grxcr1_Intergenic_upstream	-0.000353763	0.852075	-4.47712	6.81212e-05	0.0125351	-4.04163
cg46492188_TC11	cg46492188	Ilf3	Ilf3_Intron	-0.000343072	0.714648	-4.47702	6.81407e-05	0.0125351	-4.04191
cg46873407_TC21	cg46873407	Rab11a	Rab11a_fiveUTR	-0.000272071	0.879506	-4.47679	6.81896e-05	0.0125351	-4.04262
cg47911750_TC21	cg47911750	Lpar4	Lpar4_Promoter	-0.000534844	0.825783	-4.4767	6.82071e-05	0.0125351	-4.04287
cg37029014_TC21	cg37029014	Map2	Map2_Exon	-0.00035449	0.857236	-4.47608	6.83358e-05	0.012551	-4.04472
cg37031889_BC11	cg37031889	Acadl	Acadl_Intron	-0.000459729	0.631398	-4.47578	6.83995e-05	0.0125549	-4.04564
cg31853997_BC21	cg31853997	C130071C03Rik	C130071C03Rik_Intron	0.000705489	0.225377	4.47539	6.84811e-05	0.0125621	-4.04681
cg39643012_TC21	cg39643012	Gm6639	Gm6639_Intron	-0.000319677	0.662529	-4.47423	6.87233e-05	0.0125987	-4.05028
cg28108924_TC21	cg28108924	H60c	H60c_Intergenic_downstream	-0.000234914	0.529473	-4.47302	6.89763e-05	0.0126373	-4.0539
cg48191089_BC21	cg48191089	Tceanc	Tceanc_Intergenic_downstream	-0.000471517	0.810641	-4.47266	6.90527e-05	0.0126434	-4.05498
cg43846008_BC11	cg43846008	Oxtr	Oxtr_Intron	-0.000352566	0.718865	-4.4703	6.95515e-05	0.0127041	-4.06206
cg37796394_BC21	cg37796394	Ifi207	Ifi207_fiveUTR	-0.000377583	0.608227	-4.47018	6.95769e-05	0.0127041	-4.06242
cg37465860_TC21	cg37465860	Lemd1	Lemd1_fiveUTR	-0.000262861	0.790971	-4.47015	6.95824e-05	0.0127041	-4.0625
cg35282583_BC21	cg35282583	Kcng3	Kcng3_Intergenic_upstream	-0.000362662	0.857297	-4.47008	6.95987e-05	0.0127041	-4.06273
cg48213064_BC21	cg48213064	Kdm5d	Kdm5d_threeUTR	-0.000144662	0.932025	-4.46987	6.96427e-05	0.0127043	-4.06335
cg40789354_TC21	cg40789354	Ubap2	Ubap2_Intron	-0.00031937	0.86712	-4.46881	6.98677e-05	0.0127375	-4.06652
cg48023669_BC21	cg48023669	Armcx2	Armcx2_Intergenic_upstream	-0.000389824	0.851018	-4.4685	6.99347e-05	0.0127419	-4.06746
cg36462030_BC21	cg36462030	Arl3	Arl3_Intron	-0.000215998	0.735734	-4.4671	7.02334e-05	0.0127884	-4.07166
cg41794301_TC21	cg41794301	Mib2	Mib2_Intron	-0.000217288	0.753674	-4.46644	7.03738e-05	0.0128044	-4.07362
cg38627265_TC11	cg38627265	Itgav	Itgav_Intergenic_upstream	-0.000334146	0.722592	-4.46587	7.04972e-05	0.0128097	-4.07534
cg44235075_TC21	cg44235075	Vmn1r80	Vmn1r80_Exon	-0.00030586	0.72802	-4.46571	7.05312e-05	0.0128097	-4.07582
cg34439788_BC21	cg34439788	Gm32461	Gm32461_Intergenic_downstream	-0.000241318	0.142324	-4.46554	7.05665e-05	0.0128097	-4.07631
cg35248549_BC21	cg35248549	Atl2	Atl2_Intergenic_downstream	-0.000209855	0.735332	-4.46499	7.06855e-05	0.0128234	-4.07796
cg33665461_TC21	cg33665461	Creld2	Creld2_Intergenic_downstream	-0.000259603	0.460771	-4.46355	7.09958e-05	0.0128629	-4.08227
cg38444195_TC11	cg38444195	Rbms1	Rbms1_Intron	-0.000723207	0.774808	-4.46355	7.09973e-05	0.0128629	-4.08229
cg30007662_TC21	cg30007662	Cdk12	Cdk12_Intron	-0.000387669	0.872605	-4.46324	7.10641e-05	0.0128629	-4.08322
cg38648786_BC11	cg38648786	Olfr1115	Olfr1115_Promoter	-0.000595906	0.641736	-4.46302	7.11111e-05	0.0128629	-4.08387
cg35080694_BC21	cg35080694	Nudt12os	Nudt12os_Exon	0.000332099	0.775917	4.46276	7.11673e-05	0.0128629	-4.08464
cg32397256_TC21	cg32397256	1700109I08Rik	1700109I08Rik_Intergenic_downstream	-0.000300026	0.878291	-4.46266	7.11892e-05	0.0128629	-4.08495
cg43519266_TC11	cg43519266	Vmn1r33	Vmn1r33_Promoter	-0.000770947	0.759498	-4.46255	7.12137e-05	0.0128629	-4.08528
cg33291751_BC11	cg33291751	Emc2	Emc2_Exon	-0.000258133	0.918711	-4.46168	7.14018e-05	0.0128676	-4.08788
cg47684495_TC21	cg47684495	Gm4988	Gm4988_Intergenic_downstream	-0.000475636	0.819377	-4.46167	7.14042e-05	0.0128676	-4.08791
cg42178161_BC11	cg42178161	4932441J04Rik	4932441J04Rik_Exon	0.000225261	0.0522356	4.46152	7.14363e-05	0.0128676	-4.08835
cg29308712_BC21	cg29308712	Peli1	Peli1_Intron	-0.000677323	0.617548	-4.46088	7.15769e-05	0.0128825	-4.09029
cg36548569_BC21	cg36548569	Tcf7l2	Tcf7l2_Exon	-0.000232166	0.733364	-4.46037	7.16881e-05	0.0128898	-4.09181
cg33860644_TC21	cg33860644	Dnaja3	Dnaja3_Intron	-0.000348179	0.815097	-4.45902	7.19831e-05	0.0129321	-4.09585
cg36633573_TC21	cg36633573	Sntg1	Sntg1_Exon	-0.00025983	0.605394	-4.4587	7.20527e-05	0.0129367	-4.0968
cg28962883_BC21	cg28962883	Syt1	Syt1_Intron	-0.000204438	0.892415	-4.45805	7.21955e-05	0.0129456	-4.09874
cg47232796_TC11	cg47232796	Rbm6	Rbm6_Exon	-0.000286334	0.932006	-4.45788	7.22334e-05	0.0129456	-4.09926
cg48008664_TC21	cg48008664	Pcdh19	Pcdh19_Intergenic_downstream	-0.000453429	0.282654	-4.45535	7.27929e-05	0.0130365	-4.10685
cg40463923_TC11	cg40463923	Prkacb	Prkacb_Promoter	7.55767e-05	0.0156792	4.45474	7.29267e-05	0.0130365	-4.10865
cg48212933_TC21	cg48212933	Kdm5d	Kdm5d_Intron	-0.000444386	0.868765	-4.45466	7.29461e-05	0.0130365	-4.10891
cg38345174_BC21	cg38345174	1700019E08Rik	1700019E08Rik_Intergenic_downstream	-0.000285697	0.862709	-4.45459	7.2962e-05	0.0130365	-4.10913
cg42582673_TC21	cg42582673	Ttc28	Ttc28_Intron	-0.000349082	0.871654	-4.45457	7.29657e-05	0.0130365	-4.10918
cg43703970_TC11	cg43703970	Grip2	Grip2_Exon	-0.000344618	0.826139	-4.45439	7.30046e-05	0.0130365	-4.1097
ctl-Negative-420-HSA_NN21				-0.000161267	0.494129	-4.45371	7.31564e-05	0.0130458	-4.11174
cg39436770_TC21	cg39436770	Zfp512b	Zfp512b_Exon	-0.000250161	0.848696	-4.45366	7.31686e-05	0.0130458	-4.11191
cg47778010_BC21	cg47778010	4930595M18Rik	4930595M18Rik_fiveUTR	-0.000182524	0.923172	-4.45357	7.3189e-05	0.0130458	-4.11218
ctl-BS-EIF3I-CT-R-4649_BO21				-0.000212803	0.880504	-4.45314	7.3283e-05	0.0130547	-4.11344
cg35680133_TC21	cg35680133	Pggt1b	Pggt1b_threeUTR	-0.000397913	0.838045	-4.45261	7.34016e-05	0.013066	-4.11503
cg45699613_BC21	cg45699613	1190028D05Rik	1190028D05Rik_Intergenic_upstream	-0.000223422	0.921913	-4.45247	7.34345e-05	0.013066	-4.11547
cg40922415_TC21	cg40922415	Ctnnal1	Ctnnal1_Exon	-0.000328279	0.824413	-4.4521	7.3516e-05	0.0130689	-4.11656
cg33303814_BC21	cg33303814	1700022A22Rik	1700022A22Rik_Intergenic_upstream	-0.000296366	0.854655	-4.45162	7.36228e-05	0.0130689	-4.11799
cg33114558_TC21	cg33114558	Cdh9	Cdh9_Intergenic_downstream	0.000462409	0.80019	4.45162	7.36247e-05	0.0130689	-4.11802
cg36353750_BC11	cg36353750	Tnks2	Tnks2_Intron	-0.000214411	0.930821	-4.45139	7.36761e-05	0.0130689	-4.1187
cg46550986_BC11	cg46550986	Ntm	Ntm_Intron	-0.000223453	0.656057	-4.45115	7.37302e-05	0.0130689	-4.11942
rs216352409_TC21	rs216352409	Unc13b	Unc13b_Intron	0.000319114	0.106591	4.45111	7.37376e-05	0.0130689	-4.11952
cg45276092_BC11	cg45276092	Ap2a2	Ap2a2_Promoter	0.00029506	0.14612	4.45089	7.3787e-05	0.0130689	-4.12018
cg35706417_TC21	cg35706417	Dmxl1	Dmxl1_Exon	-0.000270197	0.905473	-4.45082	7.38039e-05	0.0130689	-4.12041
cg39310843_BC21	cg39310843	Sall4	Sall4_Intron	-0.000316216	0.811849	-4.45056	7.38607e-05	0.0130711	-4.12116
cg47323935_TC21	cg47323935	Rbms3	Rbms3_Intron	-0.000188449	0.899971	-4.44916	7.41779e-05	0.0131032	-4.12537
cg48218870_TC21	cg48218870	Zfy2	Zfy2_Intron	-0.000398355	0.694355	-4.44886	7.42445e-05	0.0131032	-4.12626
rs241079868_TC11	rs241079868			0.000640096	0.185242	4.44878	7.42632e-05	0.0131032	-4.1265
cg35696439_TC21	cg35696439	G630055G22Rik	G630055G22Rik_Intron	-0.000129157	0.944142	-4.44839	7.43506e-05	0.0131108	-4.12766
cg39654369_TC11	cg39654369	4932438A13Rik	4932438A13Rik_Exon	-0.000350306	0.891811	-4.44787	7.4469e-05	0.0131238	-4.12922
cg38656692_TC21	cg38656692	Olfr1223	Olfr1223_threeUTR	-0.00031694	0.877609	-4.44715	7.46336e-05	0.0131365	-4.13139
cg47414260_BC11	cg47414260	Mycs	Mycs_Intergenic_downstream	-0.000448454	0.825174	-4.44681	7.47097e-05	0.0131365	-4.1324
cg37980376_TC21	cg37980376	Hhat	Hhat_Intergenic_upstream	-0.000252497	0.902888	-4.44656	7.47661e-05	0.0131371	-4.13314
cg32337768_BC21	cg32337768	Sh3bp5	Sh3bp5_Exon	-0.000435942	0.786739	-4.44622	7.48437e-05	0.0131429	-4.13416
cg32883139_BC11	cg32883139	9330188P03Rik	9330188P03Rik_Exon	-0.000214549	0.901661	-4.44528	7.50587e-05	0.0131729	-4.13698
cg39138420_BC21	cg39138420	Bpifb9b	Bpifb9b_Intron	-0.000268103	0.550825	-4.44421	7.53043e-05	0.0132025	-4.14019
cg47494325_TC21	cg47494325	Dusp21	Dusp21_Intergenic_upstream	-0.000324365	0.870559	-4.44415	7.53166e-05	0.0132025	-4.14035
cg33852906_TC21	cg33852906	Cluap1	Cluap1_Intron	-0.000487562	0.769079	-4.4439	7.53738e-05	0.0132047	-4.14109
ctl-BS-RPS6KA6-CT-R-71901_BC21				0.000207796	0.092395	4.44235	7.57309e-05	0.013252	-4.14574
cg28453469_BC21	cg28453469	Ascc3	Ascc3_Intergenic_upstream	-0.000123617	0.633509	-4.44228	7.5748e-05	0.013252	-4.14596
cg43549428_TC11	cg43549428	Kdm3a	Kdm3a_Promoter	-0.000156929	0.94232	-4.44206	7.57967e-05	0.013252	-4.14659
cg41926513_TC11	cg41926513	Srpk2	Srpk2_Intron	-0.000617185	0.806414	-4.4419	7.58346e-05	0.013252	-4.14708
cg28780389_BC21	cg28780389	Btbd11	Btbd11_Intergenic_upstream	-0.000146122	0.929745	-4.44151	7.59253e-05	0.013252	-4.14826
cg41344833_BC21	cg41344833	Olfr1333	Olfr1333_Promoter	-0.00029533	0.485105	-4.44119	7.59995e-05	0.013252	-4.14922
cg30643047_TC21	cg30643047	Akap6	Akap6_Intron	-0.000277636	0.884337	-4.44117	7.60042e-05	0.013252	-4.14928
cg35685586_TC11	cg35685586	Ap3s1	Ap3s1_Intron	-0.000477919	0.847012	-4.44098	7.60467e-05	0.013252	-4.14983
cg32626540_BC21	cg32626540	Cdca2	Cdca2_Intron	-0.000392664	0.84466	-4.44076	7.60974e-05	0.013253	-4.15048
cg40267952_BC11	cg40267952	Pde5a	Pde5a_Intron	-0.000180237	0.952352	-4.44053	7.61523e-05	0.0132548	-4.15119
cg48246403_BC21	cg48246403	Gm20815	Gm20815_Intergenic_upstream	-0.000734545	0.779061	-4.44021	7.62266e-05	0.0132599	-4.15215
cg30005912_TC21	cg30005912	Fbxl20	Fbxl20_threeUTR	-0.000308934	0.821676	-4.43989	7.62989e-05	0.0132638	-4.15308
cg30045600_TC21	cg30045600	Tubg2	Tubg2_Promoter	0.000286764	0.192105	4.43957	7.63738e-05	0.0132638	-4.15405
cg42269423_BC21	cg42269423	Cox7b2	Cox7b2_Promoter	-0.000174624	0.932673	-4.43928	7.64412e-05	0.0132661	-4.15491
cg40009783_TC11	cg40009783	Kcnn3	Kcnn3_Intron	-0.000262017	0.905259	-4.43881	7.65523e-05	0.0132768	-4.15634
cg40433878_BC21	cg40433878	Lmo4	Lmo4_Intergenic_downstream	-0.000305106	0.847576	-4.43842	7.6643e-05	0.0132768	-4.1575
cg41705435_TC21	cg41705435	Pik3cd	Pik3cd_Exon	-0.000388561	0.854598	-4.43825	7.66822e-05	0.0132768	-4.15801
cg33016063_BC21	cg33016063	Ghr	Ghr_fiveUTR	-0.000187409	0.934543	-4.43823	7.66868e-05	0.0132768	-4.15807
cg37689903_TC21	cg37689903	Suco	Suco_Intron	-0.000450628	0.856837	-4.43786	7.6772e-05	0.0132768	-4.15916
cg42912611_BC21	cg42912611	Trim56	Trim56_Exon	-0.00023563	0.743455	-4.43703	7.69668e-05	0.0133027	-4.16165
cg41089381_BC21	cg41089381	Cntln	Cntln_Exon	-0.000475557	0.577989	-4.43683	7.70137e-05	0.0133031	-4.16225
cg48214248_BC12	cg48214248	Uty	Uty_Intron	-0.000834757	0.645655	-4.43662	7.7062e-05	0.0133036	-4.16286
cg28893471_BC11	cg28893471	Epyc	Epyc_Promoter	-0.000492126	0.865781	-4.43623	7.7154e-05	0.0133118	-4.16404
cg29071041_BC11	cg29071041	Irak3	Irak3_Exon	0.000105471	0.020408	4.43589	7.72332e-05	0.0133177	-4.16504
ctl-NP-RPS6KA5-158358-AA-1_BC21				0.000510336	0.182729	4.4348	7.74898e-05	0.0133541	-4.1683
cg34263070_BC11	cg34263070	Tfg	Tfg_Promoter	0.000171009	0.0368987	4.43418	7.76375e-05	0.0133681	-4.17017
cg28557740_BC21	cg28557740	Dnajc12	Dnajc12_Intron	0.000139546	0.0752055	4.43408	7.76609e-05	0.0133681	-4.17047
cg36304025_BC11	cg36304025	Gldc	Gldc_Intron	-0.000131801	0.953595	-4.43353	7.77913e-05	0.0133742	-4.17212
cg40756645_BC21	cg40756645	C9orf72	C9orf72_Intergenic_upstream	-0.000386236	0.869364	-4.43333	7.78392e-05	0.0133742	-4.17272
cg48213661_TC21	cg48213661	Eif2s3y	Eif2s3y_Intron	-0.000667006	0.748066	-4.43318	7.78728e-05	0.0133742	-4.17315
cg28185227_BC21	cg28185227	Utrn	Utrn_Exon	-0.000369742	0.837521	-4.43316	7.78774e-05	0.0133742	-4.17321
cg33362962_TC21	cg33362962	Has2os	Has2os_Intergenic_upstream	-0.00034323	0.862368	-4.43272	7.79816e-05	0.0133766	-4.17452
cg43316509_TC11	cg43316509	Dgki	Dgki_Intron	-0.000498205	0.656815	-4.43238	7.80628e-05	0.0133828	-4.17554
cg47674803_BC11	cg47674803	Fgf13	Fgf13_Intergenic_upstream	-0.000793694	0.687346	-4.43135	7.83089e-05	0.0134172	-4.17864
cg45567589_BC21	cg45567589	B930018H19Rik	B930018H19Rik_Intergenic_upstream	-0.000263526	0.58791	-4.429	7.88691e-05	0.0134976	-4.18564
cg28182802_BC21	cg28182802	Utrn	Utrn_Intron	-0.00029697	0.821227	-4.42815	7.90741e-05	0.0135248	-4.18819
cg48213059_TC22	cg48213059	Kdm5d	Kdm5d_threeUTR	-0.000369782	0.593727	-4.42738	7.92595e-05	0.0135487	-4.19049
cg39029725_TC21	cg39029725	Esf1	Esf1_Intron	-0.000703621	0.763191	-4.42667	7.94316e-05	0.0135703	-4.19262
cg37560042_TC11	cg37560042	Cdc73	Cdc73_Intron	-0.000220183	0.920669	-4.42601	7.95898e-05	0.0135895	-4.19458
cg34711139_BC11	cg34711139	Zfp942	Zfp942_threeUTR	-0.000180618	0.924296	-4.42458	7.99367e-05	0.0136371	-4.19885
rs260931187_TC12	rs260931187			-0.000221397	0.927751	-4.42448	7.99606e-05	0.0136371	-4.19915
cg48214399_TC21	cg48214399	Uty	Uty_Intron	-0.000383922	0.829497	-4.42394	8.00939e-05	0.0136519	-4.20078
cg32070660_TC21	cg32070660	Gpbp1	Gpbp1_threeUTR	-0.000300037	0.874048	-4.42348	8.02056e-05	0.0136627	-4.20215
cg47910501_BC21	cg47910501	Gm5127	Gm5127_Intron	-0.000602428	0.785426	-4.4233	8.02495e-05	0.0136627	-4.20269
cg36633327_BC11	cg36633327	Sntg1	Sntg1_Intron	-0.000249928	0.898075	-4.42249	8.04472e-05	0.0136885	-4.20511
cg40797917_BO21	cg40797917	Fam205a2	Fam205a2_Promoter	-0.000136016	0.923972	-4.42216	8.05271e-05	0.0136942	-4.20608
cg34279604_TC21	cg34279604	Olfr186	Olfr186_fiveUTR	-0.000287621	0.870193	-4.42196	8.05775e-05	0.0136949	-4.2067
cg30290173_TC11	cg30290173	Nploc4	Nploc4_Intron	-0.000646253	0.499803	-4.4215	8.06904e-05	0.0137063	-4.20807
rs229210769_TC11	rs229210769			0.000252087	0.0984472	4.42071	8.08843e-05	0.0137313	-4.21043
cg33832248_BC11	cg33832248	Gm36246	Gm36246_Promoter	7.4023e-05	0.0369145	4.41992	8.10777e-05	0.0137406	-4.21277
cg42169635_BC21	cg42169635	Gm10440	Gm10440_Intergenic_downstream	-0.000275685	0.853613	-4.41979	8.11093e-05	0.0137406	-4.21316
cg31119419_BC21	cg31119419	Meg3	Meg3_Intergenic_upstream	-0.000276866	0.784455	-4.4195	8.11801e-05	0.0137406	-4.21402
rs221579898_TC21	rs221579898	Olfr822	Olfr822_Intergenic_upstream	-0.000476474	0.782532	-4.41932	8.12251e-05	0.0137406	-4.21456
cg30332417_TC11	cg30332417	Klhl29	Klhl29_fiveUTR	8.82688e-05	0.0202343	4.41911	8.12784e-05	0.0137406	-4.2152
cg38110621_BC21	cg38110621	Pip4k2a	Pip4k2a_Intron	-0.000399027	0.785628	-4.41907	8.12874e-05	0.0137406	-4.21531
cg32922903_BC21	cg32922903	4930524C18Rik	4930524C18Rik_Intergenic_upstream	-0.000693178	0.696856	-4.41903	8.12976e-05	0.0137406	-4.21544
cg48016585_BC11	cg48016585	Sytl4	Sytl4_Intergenic_upstream	-0.000486064	0.825378	-4.41898	8.13105e-05	0.0137406	-4.21559
rs260931187_TC21	rs260931187			-0.000267788	0.892658	-4.41753	8.16686e-05	0.0137933	-4.21991
cg41739259_TC21	cg41739259	Dnajc11	Dnajc11_Exon	-0.000223304	0.888123	-4.41583	8.20911e-05	0.0138531	-4.22498
cg33253627_BC11	cg33253627	Ncald	Ncald_Intergenic_upstream	-0.000327048	0.823691	-4.41573	8.21166e-05	0.0138531	-4.22528
cg47451144_TC11	cg47451144	Mid1ip1	Mid1ip1_Intergenic_downstream	-0.000774132	0.647685	-4.41524	8.22382e-05	0.0138589	-4.22674
cg29716789_TC11	cg29716789	Clec10a	Clec10a_Exon	-0.000393608	0.899869	-4.41522	8.22443e-05	0.0138589	-4.22681
cg48221246_TC21	cg48221246	H2al2c	H2al2c_Intergenic_upstream	-0.0003717	0.799298	-4.41502	8.22936e-05	0.0138593	-4.2274
cg28760313_BC11	cg28760313	D10Wsu102e	D10Wsu102e_threeUTR	-0.000143832	0.678505	-4.41411	8.25216e-05	0.0138898	-4.23012
cg39997447_BC21	cg39997447	Khdc4	Khdc4_Intron	-0.00041592	0.760358	-4.41384	8.25901e-05	0.0138934	-4.23093
cg37737118_BC11	cg37737118	Uck2	Uck2_Intron	-0.000264073	0.598162	-4.41364	8.26389e-05	0.0138938	-4.23151
rs256709818_BC21	rs256709818	Htr2c	Htr2c_Intergenic_upstream	-0.000228793	0.903517	-4.41342	8.26956e-05	0.0138954	-4.23219
cg48212896_TC21	cg48212896	Kdm5d	Kdm5d_threeUTR	-0.000375823	0.87838	-4.41222	8.29978e-05	0.0139383	-4.23577
cg43992514_TC21	cg43992514	Parp11	Parp11_Intergenic_upstream	-0.00028003	0.866945	-4.41152	8.31748e-05	0.0139601	-4.23786
cg31733656_TC21	cg31733656	Zfp369	Zfp369_Intron	-0.000217397	0.805622	-4.41132	8.32235e-05	0.0139603	-4.23844
rs31558350_BC11	rs31558350			-0.00068831	0.715007	-4.41072	8.33774e-05	0.0139782	-4.24025
cg47803337_TC21	cg47803337	Il1rapl1	Il1rapl1_Intron	-0.00067421	0.657866	-4.40941	8.37093e-05	0.0140259	-4.24415
cg28917976_TC21	cg28917976	Gm35722	Gm35722_Intergenic_upstream	-0.000570587	0.749019	-4.40917	8.37705e-05	0.0140282	-4.24487
cg39777145_TC21	cg39777145	Spg20	Spg20_threeUTR	-0.000268359	0.911549	-4.40834	8.39816e-05	0.0140556	-4.24734
cg32000069_TC21	cg32000069	Cd180	Cd180_Promoter	-0.00024837	0.888593	-4.40789	8.40967e-05	0.014067	-4.24869
cg37827637_TC21	cg37827637	Cox20	Cox20_Intergenic_upstream	-0.000384792	0.760094	-4.40698	8.43282e-05	0.0140958	-4.25139
cg32963470_BC11	cg32963470	Dzip1	Dzip1_fiveUTR	0.000131149	0.0340812	4.40684	8.43646e-05	0.0140958	-4.25181
cg31119427_TC21	cg31119427	Meg3	Meg3_Intergenic_upstream	-0.000226471	0.800673	-4.40643	8.44691e-05	0.014098	-4.25303
cg48158436_TC21	cg48158436	Cdkl5	Cdkl5_Intron	-0.000425408	0.820833	-4.40637	8.44857e-05	0.014098	-4.25322
cg45244927_TC21	cg45244927	Ppp2r2d	Ppp2r2d_Intergenic_upstream	-0.000431654	0.795185	-4.40617	8.45375e-05	0.014098	-4.25382
cg39651159_TC21	cg39651159	Bbs7	Bbs7_Intron	-0.000492959	0.813932	-4.40586	8.46156e-05	0.014098	-4.25473
cg43357659_BC21	cg43357659	Tas2r143	Tas2r143_Promoter	-0.000169759	0.930368	-4.40567	8.46643e-05	0.0140982	-4.2553
cg33336366_BC11	cg33336366	Med30	Med30_Intergenic_upstream	-0.000170327	0.743967	-4.40513	8.48053e-05	0.0141112	-4.25693
cg45278245_TC21	cg45278245	Muc5ac	Muc5ac_Exon	-0.000266354	0.747977	-4.40494	8.48537e-05	0.0141112	-4.25749
cg41291368_TC21	cg41291368	Skint10	Skint10_Intergenic_upstream	-0.000288031	0.574023	-4.40419	8.50471e-05	0.0141301	-4.25973
cg47614075_TC21	cg47614075	Zfp280c	Zfp280c_Intron	-0.000492831	0.711986	-4.40393	8.5115e-05	0.0141335	-4.26051
cg44225217_TC21	cg44225217	Vmn2r52	Vmn2r52_Intergenic_upstream	-0.00107751	0.435542	-4.40348	8.52291e-05	0.0141445	-4.26183
cg42673048_BC21	cg42673048	Taok3	Taok3_Intron	-0.000414959	0.802479	-4.40306	8.53385e-05	0.0141547	-4.26309
cg45744579_TC21	cg45744579	Aadat	Aadat_Exon	-0.000268507	0.902331	-4.40225	8.55493e-05	0.0141817	-4.26551
cg38668140_BC21	cg38668140	Psmc3	Psmc3_Intron	-0.000343947	0.584812	-4.40067	8.596e-05	0.0142125	-4.27021
cg47752067_BC21	cg47752067	Pls3	Pls3_Intron	-0.0004742	0.761307	-4.40057	8.5988e-05	0.0142125	-4.27053
cg40001346_TC21	cg40001346	Rusc1	Rusc1_Exon	-0.000269861	0.687285	-4.40049	8.60074e-05	0.0142125	-4.27075
cg31838373_TC11	cg31838373	9330111N05Rik	9330111N05Rik_Intron	-0.000167753	0.916895	-4.40043	8.60231e-05	0.0142125	-4.27093
cg31455316_TC21	cg31455316	Dsp	Dsp_Exon	-0.00030536	0.900591	-4.39991	8.61595e-05	0.0142271	-4.27249
cg45826807_BC21	cg45826807	Bst2	Bst2_Intron	-0.000191781	0.914585	-4.3996	8.62414e-05	0.0142327	-4.27342
cg39155194_TC21	cg39155194	Uqcc1	Uqcc1_Intron	-0.000224337	0.907967	-4.39919	8.63486e-05	0.0142425	-4.27464
cg48008730_BC21	cg48008730	Pcdh19	Pcdh19_Intergenic_downstream	-0.000722375	0.652061	-4.39876	8.64608e-05	0.014253	-4.27592
cg31906612_TC11	cg31906612	Tent2	Tent2_Intergenic_upstream	-0.000165208	0.696724	-4.39828	8.65878e-05	0.0142627	-4.27736
cg32883269_TC21	cg32883269	Mir6390	Mir6390_Intron	-0.000252163	0.794454	-4.39817	8.66158e-05	0.0142627	-4.27768
cg47915681_BC21	cg47915681	2610002M06Rik	2610002M06Rik_Intron	-0.000372547	0.861663	-4.39757	8.67728e-05	0.0142806	-4.27945
cg35045907_BC12	cg35045907	Vmn2r118	Vmn2r118_Intron	-0.000585375	0.851355	-4.39692	8.69451e-05	0.0142942	-4.2814
cg48029221_TC11	cg48029221	Bhlhb9	Bhlhb9_Intergenic_downstream	-0.000286436	0.901139	-4.39662	8.70236e-05	0.0142942	-4.28229
cg47974875_TC21	cg47974875	Nap1l3	Nap1l3_Promoter	0.000172168	0.0703712	4.39659	8.70318e-05	0.0142942	-4.28238
cg30247563_BC21	cg30247563	Tnrc6c	Tnrc6c_Promoter	-0.000445431	0.797095	-4.39653	8.70482e-05	0.0142942	-4.28257
cg40265739_TC11	cg40265739	Fnbp1l	Fnbp1l_Exon	-0.000211505	0.91362	-4.39634	8.70976e-05	0.0142943	-4.28312
cg40106684_BC21	cg40106684	Cd2	Cd2_Exon	-0.000389179	0.856359	-4.39603	8.71808e-05	0.0142966	-4.28406
cg30806370_TC21	cg30806370	Kcnh5	Kcnh5_Exon	-0.000245466	0.866064	-4.39592	8.72081e-05	0.0142966	-4.28437
cg34140205_TC11	cg34140205	Fstl1	Fstl1_Intron	-0.000252118	0.873655	-4.39492	8.74758e-05	0.0143326	-4.28738
cg47920984_TC21	cg47920984	5730416F02Rik	5730416F02Rik_Promoter	-0.000311617	0.338201	-4.39462	8.75539e-05	0.0143374	-4.28825
cg48218215_TC21	cg48218215	Zfy2	Zfy2_Intron	-0.000489675	0.256435	-4.39378	8.77776e-05	0.0143506	-4.29076
cg34456417_TC21	cg34456417	2310057N15Rik	2310057N15Rik_Promoter	-0.000342052	0.708994	-4.39377	8.77795e-05	0.0143506	-4.29078
cg33436595_TC21	cg33436595	Tg	Tg_Exon	-0.000269284	0.869556	-4.39297	8.79935e-05	0.0143769	-4.29317
cg36293390_BC21	cg36293390	Rcl1	Rcl1_Intron	-0.000193378	0.729876	-4.39242	8.81406e-05	0.0143858	-4.29481
cg33144866_BC21	cg33144866	Cdh18	Cdh18_Intron	-0.00036088	0.858653	-4.39189	8.8282e-05	0.0143988	-4.29639
cg39739855_BC11	cg39739855	Setd7	Setd7_Intron	-0.000171838	0.963809	-4.39176	8.83178e-05	0.0143988	-4.29678
cg29255491_BC21	cg29255491	Cobl	Cobl_Intron	-0.00022965	0.898652	-4.39143	8.84056e-05	0.0144052	-4.29776
cg44821688_TC21	cg44821688	Olfr310	Olfr310_Promoter	-0.000493451	0.779476	-4.39065	8.86167e-05	0.0144316	-4.3001
rs4211703_BC21	rs4211703	4930553E22Rik	4930553E22Rik_Intergenic_upstream	-0.000186089	0.929607	-4.39027	8.8719e-05	0.0144404	-4.30124
cg43283298_TC21	cg43283298	Chchd3	Chchd3_Intron	-0.000239305	0.891439	-4.38963	8.88891e-05	0.0144601	-4.30312
cg34822339_TC21	cg34822339	Btbd9	Btbd9_Exon	-0.000148378	0.931501	-4.3893	8.89787e-05	0.014462	-4.3041
cg34858710_TC21	cg34858710	Ring1	Ring1_Exon	-0.000521417	0.734894	-4.38863	8.91606e-05	0.014462	-4.30611
cg36614919_TC11	cg36614919	Atp6v1h	Atp6v1h_Intergenic_downstream	-0.000163313	0.472129	-4.38859	8.91701e-05	0.014462	-4.30621
cg48215397_TC21	cg48215397	Usp9y	Usp9y_Intron	0.00084047	0.290456	4.3884	8.92228e-05	0.014462	-4.3068
cg47721335_BC21	cg47721335	Gm14725	Gm14725_Intergenic_downstream	-0.000639556	0.775793	-4.38836	8.92331e-05	0.014462	-4.30691
cg47476298_BC21	cg47476298	Cask	Cask_Exon	-0.000265974	0.915474	-4.38822	8.92722e-05	0.014462	-4.30734
cg47644317_TC21	cg47644317	Rtl8a	Rtl8a_Intron	-0.00025736	0.624415	-4.38815	8.92913e-05	0.014462	-4.30755
cg34742302_TC21	cg34742302	Unkl	Unkl_Exon	-0.000207438	0.89528	-4.38729	8.9524e-05	0.0144825	-4.3101
cg47575953_BC21	cg47575953	Gria3	Gria3_Intergenic_upstream	-0.000710852	0.746668	-4.38708	8.95822e-05	0.0144825	-4.31074
cg47657748_BC11	cg47657748	Slc9a6	Slc9a6_threeUTR	-0.000467376	0.804218	-4.38671	8.96807e-05	0.0144825	-4.31182
cg45162397_TC21	cg45162397	Fgfr2	Fgfr2_Intron	-0.000358413	0.59661	-4.38645	8.9751e-05	0.0144825	-4.31259
cg47709727_TC21	cg47709727	Mir509	Mir509_Intergenic_upstream	-0.000398999	0.850516	-4.38642	8.97602e-05	0.0144825	-4.31269
cg44131151_BC11	cg44131151	Sox5	Sox5_Intron	-0.000177273	0.927912	-4.38594	8.98912e-05	0.0144898	-4.31412
cg38294678_TC21	cg38294678	Rabgap1	Rabgap1_Intron	-0.000565287	0.810878	-4.3855	9.00118e-05	0.0144898	-4.31544
cg32466066_TC11	cg32466066	Olfr731	Olfr731_Promoter	-0.000770912	0.80303	-4.38525	9.00802e-05	0.0144898	-4.31618
cg30793956_TC21	cg30793956	Tmem30b	Tmem30b_Promoter	-0.000226129	0.545763	-4.38524	9.00825e-05	0.0144898	-4.31621
cg42570575_TC21	cg42570575	Chfr	Chfr_Intron	-0.000251823	0.916136	-4.38518	9.00992e-05	0.0144898	-4.31639
cg47866924_BC21	cg47866924	Awat2	Awat2_Exon	-0.000460395	0.614553	-4.38485	9.01887e-05	0.0144963	-4.31737
ctl-Negative-461-HSA_NN21				-0.000149686	0.491017	-4.38429	9.03436e-05	0.0145133	-4.31905
cg47621773_BC21	cg47621773	Olfr1323	Olfr1323_Intergenic_upstream	-0.000610938	0.826168	-4.38303	9.06886e-05	0.0145608	-4.32279
cg47748962_BC21	cg47748962	F8	F8_Intron	-0.00035837	0.845904	-4.38228	9.08952e-05	0.0145624	-4.32503
cg34863852_TO21	cg34863852	H2-Ea-ps	H2-Ea-ps_Promoter	-0.000613336	0.73549	-4.38184	9.10163e-05	0.0145721	-4.32633
cg47449952_BC11	cg47449952	Mid1ip1	Mid1ip1_Intergenic_upstream	-0.00073736	0.585183	-4.38169	9.10579e-05	0.0145721	-4.32678
cg36245220_TC21	cg36245220	Tjp2	Tjp2_Intron	-0.000224353	0.928758	-4.38153	9.11031e-05	0.0145721	-4.32727
cg47200539_TC21	cg47200539	Cpne4	Cpne4_Intron	-0.000302134	0.340582	-4.38121	9.11898e-05	0.0145781	-4.3282
cg35755702_TC21	cg35755702	Aldh7a1	Aldh7a1_Intron	-0.000369878	0.831645	-4.38101	9.1246e-05	0.0145792	-4.32881
cg42192147_BC21	cg42192147	4933402J10Rik	4933402J10Rik_Intergenic_upstream	-0.000410712	0.826513	-4.38041	9.1412e-05	0.0145972	-4.33059
cg44663217_TC21	cg44663217	Asb7	Asb7_threeUTR	-0.00025165	0.884968	-4.38025	9.14575e-05	0.0145972	-4.33108
ctl-BS-ABCG2-CA-R-27022_TO11				-7.05141e-05	0.958486	-4.38007	9.15068e-05	0.0145972	-4.33161
cg37541494_BC21	cg37541494	Gm34816	Gm34816_Promoter	-0.000270907	0.905204	-4.37932	9.17147e-05	0.0146113	-4.33384
cg34687584_TC11	cg34687584	LOC102640673	LOC102640673_Intron	-0.000195221	0.927065	-4.37919	9.17506e-05	0.0146113	-4.33422
cg48223361_TC21	cg48223361	Gm3376	Gm3376_Intergenic_downstream	-0.000823512	0.695225	-4.37909	9.17776e-05	0.0146113	-4.33451
cg36376428_TC21	cg36376428	Cyp2c66	Cyp2c66_Intergenic_upstream	-0.00064831	0.741902	-4.37904	9.17928e-05	0.0146113	-4.33467
cg46173636_BC21	cg46173636	Bcar1	Bcar1_Intron	-0.000255026	0.812462	-4.37823	9.20177e-05	0.014638	-4.33708
cg30846395_BC11	cg30846395	Rad51b	Rad51b_Intron	-0.000209079	0.923171	-4.37808	9.2059e-05	0.014638	-4.33752
cg36354505_TC11	cg36354505	Btaf1	Btaf1_Intron	-0.00028163	0.102893	-4.37782	9.21339e-05	0.014642	-4.33832
cg45089730_BC21	cg45089730	Rbbp6	Rbbp6_Promoter	-0.000280552	0.89247	-4.37737	9.22594e-05	0.0146541	-4.33965
cg46494019_BC21	cg46494019	AB124611	AB124611_Promoter	-0.000263023	0.542058	-4.37683	9.24107e-05	0.0146703	-4.34126
cg47810281_TC21	cg47810281	Dcaf8l	Dcaf8l_Intergenic_downstream	-0.000362179	0.858807	-4.37653	9.24931e-05	0.0146755	-4.34213
cg31744554_TC21	cg31744554	Zfp457	Zfp457_Exon	-0.000588031	0.712308	-4.37629	9.25608e-05	0.0146783	-4.34285
cg42385088_TC21	cg42385088	Prol1	Prol1_Intron	-0.000541576	0.771521	-4.37462	9.3031e-05	0.014745	-4.34783
cg45227258_BC21	cg45227258	Mgmt	Mgmt_Intergenic_upstream	-0.000296969	0.717772	-4.37439	9.30948e-05	0.0147472	-4.3485
cg42916766_BC21	cg42916766	Zan	Zan_Intron	-0.000198525	0.709548	-4.37379	9.3265e-05	0.0147663	-4.35029
cg31371879_BC11	cg31371879	Prl	Prl_Intron	-8.07204e-05	0.967535	-4.3729	9.35187e-05	0.0147902	-4.35296
ctl-NP-CCND3-87768-GG-1_BC21				-0.000187568	0.922012	-4.37278	9.35514e-05	0.0147902	-4.3533
cg30411962_TC21	cg30411962	Odc1	Odc1_Intergenic_downstream	-0.000368537	0.56546	-4.37257	9.36111e-05	0.0147902	-4.35393
cg47757626_BC21	cg47757626	Cldn34d	Cldn34d_Exon	-0.000456816	0.531841	-4.37095	9.40725e-05	0.0148525	-4.35876
cg48213992_TC21	cg48213992	Uty	Uty_Intron	-0.000590073	0.703276	-4.37082	9.41105e-05	0.0148525	-4.35915
cg47712467_TC21	cg47712467	Fmr1	Fmr1_Exon	-0.000719228	0.719229	-4.37045	9.42143e-05	0.0148596	-4.36023
cg35113364_TC21	cg35113364	Man2a1	Man2a1_Intron	-0.000226373	0.92123	-4.36945	9.44998e-05	0.0148822	-4.3632
cg30838889_BC21	cg30838889	Gphn	Gphn_Intron	-0.000242533	0.886948	-4.36884	9.46757e-05	0.0148888	-4.36503
cg44775981_TC21	cg44775981	Blm	Blm_Intron	-0.000147905	0.9281	-4.36882	9.46814e-05	0.0148888	-4.36509
cg43629577_BC11	cg43629577	Zfp638	Zfp638_Intron	-0.000377867	0.863079	-4.36878	9.46922e-05	0.0148888	-4.3652
cg44615638_TC21	cg44615638	Snrpn	Snrpn_Intron	-0.000310996	0.56871	-4.36843	9.47938e-05	0.0148935	-4.36625
cg38180268_BC21	cg38180268	Wdr5	Wdr5_Intron	-0.000275378	0.817645	-4.36816	9.48713e-05	0.0148935	-4.36705
cg39149661_TC21	cg39149661	Ncoa6	Ncoa6_Intron	-0.000177918	0.932693	-4.36788	9.49513e-05	0.0148935	-4.36788
cg34912949_TC21	cg34912949	Esp8	Esp8_Intron	-0.000315433	0.674341	-4.36782	9.49691e-05	0.0148935	-4.36807
cg46228825_TC21	cg46228825	Bco1	Bco1_Intron	-0.000320128	0.865413	-4.36759	9.5034e-05	0.0148935	-4.36874
cg37459616_TC21	cg37459616	Ctse	Ctse_Intron	-0.000314314	0.880084	-4.36747	9.50707e-05	0.0148935	-4.36912
cg37797481_TC21	cg37797481	Ifi202b	Ifi202b_Intron	-0.000276725	0.864398	-4.36745	9.50745e-05	0.0148935	-4.36915
cg43645927_BC21	cg43645927	Nat8f6	Nat8f6_fiveUTR	-0.000344579	0.50473	-4.36678	9.52703e-05	0.0149163	-4.37117
cg42011816_TC21	cg42011816	Nkx1-1	Nkx1-1_Intergenic_upstream	-0.000299711	0.832209	-4.36589	9.55261e-05	0.0149346	-4.37381
cg33237976_BC21	cg33237976	Rnf19a	Rnf19a_Intron	-0.000241136	0.902183	-4.36585	9.55388e-05	0.0149346	-4.37394
cg38888198_TC21	cg38888198	Frmd5	Frmd5_Exon	0.000524045	0.695645	4.36561	9.56084e-05	0.0149376	-4.37465
ctl-BS-RPS6KA6-CA-R-130907_TO21				0.000661056	0.320806	4.36462	9.58955e-05	0.0149696	-4.37759
cg29157131_TC21	cg29157131	Rbms2	Rbms2_Intron	-0.000255232	0.159687	-4.36455	9.59143e-05	0.0149696	-4.37779
cg43034123_TC11	cg43034123	Flt3	Flt3_Intron	-0.000233479	0.903807	-4.36392	9.60971e-05	0.0149888	-4.37965
cg39378332_TC21	cg39378332	Vapb	Vapb_Exon	-0.000180531	0.812411	-4.36364	9.6181e-05	0.0149888	-4.38051
cg34679140_TC11	cg34679140	Chd1	Chd1_Intron	-7.25135e-05	0.974386	-4.36361	9.61888e-05	0.0149888	-4.38059
cg37186458_TC11	cg37186458	Eif4e2	Eif4e2_Promoter	0.00023848	0.0953441	4.36325	9.62935e-05	0.0149972	-4.38166
cg32701555_TC11	cg32701555	Serp2	Serp2_Intron	-0.000255954	0.772226	-4.36302	9.63605e-05	0.0149997	-4.38234
cg33774194_BC21	cg33774194	Olfr282	Olfr282_fiveUTR	-0.000356948	0.832488	-4.36202	9.66525e-05	0.0150373	-4.38531
cg35710175_TC21	cg35710175	Fam170a	Fam170a_Intergenic_downstream	-0.00032128	0.484142	-4.36118	9.68998e-05	0.0150678	-4.38782
cg37827014_TC21	cg37827014	Desi2	Desi2_Intron	-0.000445119	0.783937	-4.36068	9.70466e-05	0.0150697	-4.3893
cg46617222_BC12	cg46617222	Olfr904	Olfr904_Promoter	-0.000853048	0.731741	-4.36062	9.70646e-05	0.0150697	-4.38949
cg35752826_TC11	cg35752826	Gramd3	Gramd3_Intergenic_upstream	-0.000813285	0.723328	-4.36001	9.72434e-05	0.0150895	-4.39129
cg47717104_TC11	cg47717104	Aff2	Aff2_Intron	-0.000346895	0.868356	-4.35893	9.75615e-05	0.015129	-4.3945
cg28745828_TC21	cg28745828	Zfp781	Zfp781_Intron	-0.00018668	0.702401	-4.35851	9.76859e-05	0.0151344	-4.39575
cg29309522_BC21	cg29309522	Vps54	Vps54_Intergenic_upstream	-0.000354784	0.540663	-4.35783	9.7888e-05	0.0151578	-4.39777
cg48174907_BC21	cg48174907	Rnf138rt1	Rnf138rt1_Intergenic_downstream	-0.000384088	0.85526	-4.35739	9.8019e-05	0.0151701	-4.39909
rs6153119_BC21	rs6153119	Impg1	Impg1_Intron	0.000389682	0.120906	4.35644	9.82994e-05	0.0151942	-4.40189
cg46827526_TC11	cg46827526	Lrrc49	Lrrc49_threeUTR	-0.000256651	0.941871	-4.35641	9.83084e-05	0.0151942	-4.40198
cg42828550_TC21	cg42828550	Sfswap	Sfswap_Intergenic_upstream	-0.000288953	0.704274	-4.35531	9.86392e-05	0.0152343	-4.40528
cg47420273_BC21	cg47420273	Shroom4	Shroom4_Intergenic_downstream	-0.000452452	0.824031	-4.35504	9.87183e-05	0.0152385	-4.40606
cg31284693_TC11	cg31284693	B3galnt2	B3galnt2_threeUTR	-0.000525957	0.851981	-4.35429	9.89427e-05	0.0152643	-4.40829
cg34045379_BC21	cg34045379	Fgf12	Fgf12_Intron	-0.000359482	0.36606	-4.35414	9.89886e-05	0.0152643	-4.40875
cg34302182_TC21	cg34302182	Pros1	Pros1_Intron	-0.000487419	0.830013	-4.35341	9.92078e-05	0.0152902	-4.41092
cg42993064_BC21	cg42993064	D130017N08Rik	D130017N08Rik_Intron	-0.000230197	0.733436	-4.35321	9.92683e-05	0.0152915	-4.41151
cg48010025_TC21	cg48010025	Pcdh19	Pcdh19_Intergenic_downstream	-0.000369466	0.864714	-4.35109	9.99067e-05	0.0153819	-4.4178
cg47930332_BC21	cg47930332	Rps6ka6	Rps6ka6_Exon	-0.000221161	0.897822	-4.35071	0.000100021	0.0153868	-4.41893
cg34541950_BC21	cg34541950	Ets2	Ets2_Promoter	-0.000354058	0.679683	-4.35064	0.000100043	0.0153868	-4.41914
cg28827013_BC21	cg28827013	Anks1b	Anks1b_Exon	7.20762e-05	0.0422821	4.35043	0.000100106	0.0153886	-4.41976
cg31695921_BC21	cg31695921	Gm5084	Gm5084_Exon	-0.000284618	0.660988	-4.34999	0.000100239	0.0154011	-4.42107
cg29352077_BC21	cg29352077	Ccdc85a	Ccdc85a_Intergenic_downstream	-0.000468284	0.605617	-4.34945	0.000100404	0.0154183	-4.42267
cg34110098_TC11	cg34110098	Kalrn	Kalrn_Intron	-0.000451141	0.898087	-4.34746	0.000101011	0.0154816	-4.42859
cg44038750_TC11	cg44038750	Bcl2l14	Bcl2l14_Intron	-0.00032149	0.618412	-4.34726	0.000101071	0.0154816	-4.42918
cg35672869_TC21	cg35672869	Ythdc2	Ythdc2_Intergenic_downstream	-0.000465953	0.721293	-4.34724	0.000101077	0.0154816	-4.42923
cg42970445_TC11	cg42970445	Sdk1	Sdk1_Exon	-0.000318946	0.888865	-4.34563	0.000101571	0.0155474	-4.43401
cg43261937_BC21	cg43261937	Ssmem1	Ssmem1_Intron	-0.000212494	0.907445	-4.3454	0.000101641	0.0155474	-4.43469
cg44209707_BC21	cg44209707	Olfr1346	Olfr1346_Exon	-0.000275277	0.476692	-4.34533	0.000101664	0.0155474	-4.43491
cg43620878_TC21	cg43620878	Dctn1	Dctn1_Intron	-0.000191379	0.919802	-4.34513	0.000101725	0.0155487	-4.4355
cg31390357_TC21	cg31390357	E2f3	E2f3_threeUTR	-0.000301744	0.629885	-4.34453	0.00010191	0.0155689	-4.43728
cg48213241_BC21	cg48213241	Kdm5d	Kdm5d_Intergenic_downstream	-0.000216248	0.509153	-4.34335	0.000102275	0.0156086	-4.44079
cg46057318_BC21	cg46057318	Gm15679	Gm15679_Intergenic_upstream	-0.000454601	0.798587	-4.34335	0.000102276	0.0156086	-4.4408
cg48086085_BC21	cg48086085	Amot	Amot_Intergenic_upstream	-0.000605919	0.804748	-4.34277	0.000102456	0.015628	-4.44252
cg35608744_TC21	cg35608744	Pcdha1	Pcdha1_Exon	-0.000273329	0.91523	-4.34254	0.000102525	0.0156305	-4.44318
cg40206058_BC11	cg40206058	Olfm3	Olfm3_Intergenic_upstream	-0.000286033	0.919208	-4.34214	0.000102649	0.0156324	-4.44437
cg47728082_BC21	cg47728082	Vma21	Vma21_Intergenic_downstream	-0.000373251	0.402775	-4.342	0.000102695	0.0156324	-4.44481
ctl-BS-ARF4-CA-F-12704_TO11				-0.000105179	0.964694	-4.3416	0.000102818	0.015643	-4.44598
cg47553564_TC21	cg47553564	Pgrmc1	Pgrmc1_Intergenic_downstream	-0.00021754	0.889286	-4.34121	0.00010294	0.0156535	-4.44714
cg40796230_BO21	cg40796230	Ccl27a	Ccl27a_Promoter	-0.000218956	0.418527	-4.34076	0.000103079	0.0156602	-4.44847
rs234134949_BC21	rs234134949			-0.000139184	0.940003	-4.34073	0.000103089	0.0156602	-4.44857
cg34007338_TC21	cg34007338	Dgkg	Dgkg_Intergenic_upstream	-0.00028785	0.332366	-4.34016	0.000103268	0.0156793	-4.45027
rs257595325_BC21	rs257595325	Greb1l	Greb1l_Intron	0.00031747	0.107955	4.33865	0.00010374	0.01574	-4.45474
cg40935596_BC11	cg40935596	Txn1	Txn1_Intergenic_upstream	-0.000242299	0.87651	-4.33854	0.000103774	0.01574	-4.45507
cg38433918_BC21	cg38433918	Wdsub1	Wdsub1_Intron	-0.000511025	0.807432	-4.33777	0.000104017	0.0157637	-4.45735
cg48011479_BC21	cg48011479	Pcdh19	Pcdh19_Exon	-0.000601917	0.792216	-4.33765	0.000104054	0.0157637	-4.45771
cg29867749_BO21	cg29867749	Usp32	Usp32_Intron	-0.000227913	0.89336	-4.33754	0.00010409	0.0157637	-4.45805
cg47920204_TC21	cg47920204	Brwd3	Brwd3_Intron	-0.000303614	0.891873	-4.33716	0.000104208	0.0157734	-4.45915
cg47405108_BC21	cg47405108	Ccr3	Ccr3_Promoter	-0.000172469	0.916242	-4.33605	0.00010456	0.0158106	-4.46247
cg44263287_BC21	cg44263287	Npas1	Npas1_Intron	-0.000440496	0.420202	-4.33448	0.000105058	0.0158777	-4.46713
cg38995866_TC11	cg38995866	Hao1	Hao1_Intergenic_upstream	-0.000142182	0.958224	-4.3341	0.000105178	0.0158878	-4.46824
cg47594983_TC11	cg47594983	Dcaf12l1	Dcaf12l1_Promoter	-0.000712211	0.774551	-4.33381	0.000105272	0.0158939	-4.46912
cg43772155_BC21	cg43772155	Prok2	Prok2_Exon	-0.000186154	0.493436	-4.33363	0.000105328	0.0158942	-4.46964
cg45641344_TC21	cg45641344	Mtnr1a	Mtnr1a_Intron	-0.000501264	0.845701	-4.3331	0.000105496	0.015897	-4.47121
cg37534004_TC11	cg37534004	Nek7	Nek7_Intron	-0.000108839	0.967199	-4.33303	0.000105518	0.015897	-4.47141
cg46617222_BC11	cg46617222	Olfr904	Olfr904_Promoter	-0.00078383	0.737502	-4.33297	0.00010554	0.015897	-4.47162
cg31576092_BC21	cg31576092	Gm906	Gm906_Intergenic_downstream	-0.000187465	0.663796	-4.3329	0.000105561	0.015897	-4.47181
cg44773937_TC21	cg44773937	Unc45a	Unc45a_threeUTR	-0.000289744	0.900341	-4.33197	0.00010586	0.0159299	-4.47458
cg28979690_BC21	cg28979690	Csrp2	Csrp2_Intron	-0.000396411	0.533884	-4.33136	0.000106055	0.0159471	-4.47639
cg47892069_BC11	cg47892069	Ftx	Ftx_Exon	-0.000598465	0.573994	-4.33108	0.000106144	0.0159523	-4.47721
cg48215042_TC22	cg48215042	Usp9y	Usp9y_Intron	-0.000684717	0.640306	-4.32988	0.00010653	0.015986	-4.48078
cg35557456_TC21	cg35557456	Polr2d	Polr2d_Intron	-0.000176625	0.923399	-4.32938	0.000106692	0.015997	-4.48227
cg42499191_TC21	cg42499191	Wdfy3	Wdfy3_Intergenic_upstream	-0.000476662	0.837958	-4.32932	0.000106711	0.015997	-4.48244
cg33976790_TC21	cg33976790	Olfr170	Olfr170_Promoter	-0.000417132	0.787404	-4.32893	0.000106837	0.0160077	-4.48359
cg45773868_BC11	cg45773868	Apela	Apela_Intron	-0.00014894	0.926108	-4.32823	0.000107061	0.0160332	-4.48565
ctl-BS-RPS6KA5-CA-F-166375_BC11				-0.000187376	0.915692	-4.32801	0.000107132	0.0160357	-4.4863
cg34305010_TO21	cg34305010	Epha3	Epha3_Intron	-0.000313507	0.857323	-4.32784	0.000107188	0.0160359	-4.48681
cg29883356_TO21	cg29883356	Vmp1	Vmp1_Intron	-0.000176114	0.418847	-4.32749	0.000107303	0.016045	-4.48786
cg39588810_BC21	cg39588810	Gm1527	Gm1527_Promoter	-0.000278019	0.679914	-4.32682	0.000107521	0.0160695	-4.48985
ctl-BS-ARF1-CT-R-5856_BO21				-0.000129874	0.891642	-4.3256	0.000107917	0.0161135	-4.49346
cg37658179_BC11	cg37658179	Rasal2	Rasal2_Intron	-0.000710031	0.729183	-4.32558	0.000107924	0.0161135	-4.49352
cg47756632_BC11	cg47756632	Cldn34d	Cldn34d_Intergenic_upstream	-0.000615234	0.624329	-4.32526	0.000108027	0.016115	-4.49446
cg40640685_TC21	cg40640685	Calb1	Calb1_Exon	-0.00045618	0.619956	-4.32521	0.000108043	0.016115	-4.49461
rs265202640_BC11	rs265202640	Kcnh7	Kcnh7_Intron	-0.000439904	0.81668	-4.32416	0.000108389	0.0161504	-4.49774
cg39534856_BC11	cg39534856	Hps3	Hps3_Exon	-0.000120832	0.946912	-4.32365	0.000108555	0.0161606	-4.49924
cg43956376_BC21	cg43956376	Vmn2r27	Vmn2r27_Promoter	-0.000201776	0.902788	-4.32361	0.000108567	0.0161606	-4.49935
cg33397936_TC11	cg33397936	9930014A18Rik	9930014A18Rik_Exon	-0.000225694	0.666707	-4.32218	0.000109038	0.0162144	-4.5036
cg46699581_BC21	cg46699581	2900052N01Rik	2900052N01Rik_Intergenic_upstream	-0.000364246	0.716576	-4.32194	0.000109118	0.0162181	-4.50431
cg40369860_BC21	cg40369860	Manba	Manba_Intron	-0.000445112	0.379037	-4.32133	0.000109319	0.0162398	-4.50611
cg38650918_TC21	cg38650918	Olfr1137	Olfr1137_Promoter	-0.000258201	0.896494	-4.32097	0.000109437	0.0162493	-4.50718
cg30255519_TC21	cg30255519	Cyth1	Cyth1_Intron	-0.000267193	0.636446	-4.32066	0.000109541	0.0162565	-4.5081
cg33004478_TC11	cg33004478	Pcca	Pcca_Exon	-0.00016828	0.962738	-4.32048	0.000109602	0.0162574	-4.50865
cg33711658_BC21	cg33711658	Pphln1	Pphln1_Intron	-0.000251128	0.906304	-4.3202	0.000109693	0.0162628	-4.50947
cg47397234_TC11	cg47397234	Zfp105	Zfp105_Exon	-0.000297785	0.897827	-4.3192	0.000110027	0.0163041	-4.51244
cg44720564_TC21	cg44720564	1810026B05Rik	1810026B05Rik_Intergenic_upstream	-0.000497574	0.808456	-4.31889	0.000110129	0.0163111	-4.51336
cg46121017_BC21	cg46121017	Nfat5	Nfat5_Exon	-0.000143252	0.933296	-4.31851	0.000110255	0.0163213	-4.51448
cg40484410_TC21	cg40484410	Adgrl2	Adgrl2_Intergenic_upstream	-0.000150343	0.935806	-4.31835	0.000110308	0.0163213	-4.51495
cg30270873_BC21	cg30270873	Tbc1d16	Tbc1d16_Intron	-0.000314085	0.839176	-4.31817	0.000110367	0.0163219	-4.51548
cg38550417_BC21	cg38550417	Atf2	Atf2_Intron	-0.000156401	0.940151	-4.31752	0.000110586	0.016346	-4.51741
cg48069908_TC11	cg48069908	Tmem164	Tmem164_Intron	-0.000130015	0.950487	-4.3169	0.000110795	0.0163637	-4.51926
cg36866392_TC11	cg36866392	Pantr1	Pantr1_Intergenic_downstream	-0.000314218	0.879026	-4.31683	0.000110816	0.0163637	-4.51945
cg47966011_BC21	cg47966011	Pcdh11x	Pcdh11x_Intergenic_upstream	-0.00031545	0.859034	-4.31643	0.000110949	0.0163703	-4.52063
cg28489061_TC21	cg28489061	Gm36595	Gm36595_Exon	-0.000288934	0.879281	-4.31637	0.000110971	0.0163703	-4.52083
cg47932983_TC21	cg47932983	4933403O08Rik	4933403O08Rik_Intron	-0.000747715	0.677012	-4.31571	0.000111191	0.0163946	-4.52277
cg48214198_TC21	cg48214198	Uty	Uty_Intron	-0.000607119	0.828948	-4.31489	0.000111468	0.0164272	-4.52521
cg39282453_TC11	cg39282453	Cse1l	Cse1l_Exon	-0.000152114	0.933559	-4.31423	0.00011169	0.0164518	-4.52716
cg43124383_BC21	cg43124383	Mios	Mios_Exon	-0.000368768	0.86197	-4.31405	0.000111753	0.0164528	-4.52771
ctl-BS-RPS6KA6-CA-F-141300_TC21				0.000500355	0.144609	4.31235	0.000112329	0.0165123	-4.53275
cg40644163_TC21	cg40644163	Ripk2	Ripk2_Intron	-0.000193986	0.916788	-4.3123	0.000112343	0.0165123	-4.53287
cg47931232_TC21	cg47931232	Hdx	Hdx_Exon	-0.000507235	0.622417	-4.31207	0.000112424	0.0165123	-4.53358
cg40902366_BC21	cg40902366	Tmem38b	Tmem38b_Intergenic_downstream	-0.000329381	0.329972	-4.31203	0.000112436	0.0165123	-4.53368
cg44612039_BC11	cg44612039	Ube3a	Ube3a_Exon	-0.000588915	0.728802	-4.31184	0.000112499	0.0165135	-4.53424
cg28108875_BC11	cg28108875	H60c	H60c_Intergenic_downstream	-0.000180412	0.729752	-4.3116	0.000112583	0.0165175	-4.53496
cg46821124_TC21	cg46821124	Nr2e3	Nr2e3_Intron	-0.000451892	0.814978	-4.31138	0.000112656	0.01652	-4.5356
cg46569882_TC21	cg46569882	Tmem45b	Tmem45b_Intergenic_upstream	-0.00045717	0.389683	-4.31115	0.000112736	0.0165236	-4.5363
cg43301107_TC21	cg43301107	Stra8	Stra8_Intron	-0.000312875	0.716461	-4.31042	0.000112983	0.0165516	-4.53844
cg46676900_TC11	cg46676900	Phldb1	Phldb1_fiveUTR	-0.000242176	0.757621	-4.30938	0.000113339	0.0165956	-4.54153
ctl-NP-CCND3-55209-GA-2_TC21				-0.000139084	0.950321	-4.30815	0.000113762	0.0166493	-4.54518
cg33911793_TC21	cg33911793	Zc3h7a	Zc3h7a_fiveUTR	0.000247035	0.0983426	4.30702	0.00011415	0.016694	-4.54852
cg33161615_BC21	cg33161615	Retreg1	Retreg1_Intron	-0.000303929	0.83448	-4.30693	0.000114181	0.016694	-4.54878
cg29094492_TC11	cg29094492	Srgap1	Srgap1_Intron	-0.000272959	0.898542	-4.30669	0.000114265	0.0166982	-4.54951
cg36355201_BC21	cg36355201	Btaf1	Btaf1_Intergenic_downstream	-0.000743854	0.681068	-4.30645	0.000114347	0.016702	-4.55021
cg37251084_TC21	cg37251084	Hdlbp	Hdlbp_Exon	-0.000348504	0.796902	-4.30576	0.000114586	0.0167225	-4.55225
cg37866632_TC21	cg37866632	Lbr	Lbr_Exon	-0.000241689	0.905215	-4.30559	0.000114646	0.0167225	-4.55277
cg29216941_BC21	cg29216941	Ccm2	Ccm2_Intron	-0.000149571	0.932533	-4.30555	0.000114658	0.0167225	-4.55287
cg32365344_BC21	cg32365344	Syt15	Syt15_Exon	-0.000279929	0.865864	-4.30529	0.000114748	0.0167275	-4.55364
cg48050494_TC21	cg48050494	Tbc1d8b	Tbc1d8b_Intron	-0.000465643	0.853227	-4.30448	0.000115029	0.0167457	-4.55603
rs244908367_BC11	rs244908367	Lrrtm4	Lrrtm4_Intron	-0.000444427	0.852947	-4.30444	0.000115043	0.0167457	-4.55615
cg32596403_BC21	cg32596403	Kif13b	Kif13b_Exon	-0.000156808	0.938479	-4.30387	0.000115241	0.0167637	-4.55784
cg36972983_TC21	cg36972983	C2cd6	C2cd6_Exon	-0.000454228	0.74382	-4.30376	0.000115279	0.0167637	-4.55817
cg47686759_TC21	cg47686759	4933402E13Rik	4933402E13Rik_Intergenic_upstream	-0.000810133	0.430958	-4.30321	0.00011547	0.0167695	-4.55979
cg38670657_BC21	cg38670657	Pacsin3	Pacsin3_Promoter	-0.00011301	0.0706964	-4.30283	0.000115604	0.0167695	-4.56092
cg46470648_BC21	cg46470648	Olfr24	Olfr24_Intron	-0.000846289	0.569815	-4.30277	0.000115626	0.0167695	-4.56111
cg46792976_TC21	cg46792976	Neil1	Neil1_Exon	-0.000317414	0.630752	-4.30267	0.000115661	0.0167695	-4.56141
cg33602799_TC21	cg33602799	Bik	Bik_Intron	-0.000116498	0.416922	-4.30262	0.000115676	0.0167695	-4.56154
cg35025333_TC11	cg35025333	Satb1	Satb1_Intron	-0.00016588	0.937872	-4.30256	0.0001157	0.0167695	-4.56174
cg47943733_TC21	cg47943733	Klhl4	Klhl4_Exon	-0.000353618	0.852827	-4.30203	0.000115884	0.0167856	-4.56329
cg42671219_BC21	cg42671219	Taok3	Taok3_Intron	-0.000481315	0.744721	-4.3018	0.000115963	0.0167874	-4.56396
cg47632159_BC11	cg47632159	Usp26	Usp26_Promoter	-0.000180679	0.935306	-4.30167	0.00011601	0.0167874	-4.56436
cg42556658_BC11	cg42556658	Mtf2	Mtf2_Exon	-0.000200105	0.923153	-4.29878	0.000117026	0.0169179	-4.57291
cg37826767_BC21	cg37826767	Desi2	Desi2_Intron	0.000346368	0.308992	4.29802	0.000117295	0.0169486	-4.57516
ctl-BS-RPS6KA5-CT-R-6557_BC21				0.000143087	0.065745	4.29712	0.000117614	0.0169728	-4.57782
cg47373455_BC21	cg47373455	1700020M21Rik	1700020M21Rik_Intergenic_downstream	-0.000121685	0.941142	-4.29706	0.000117635	0.0169728	-4.578
cg36601355_TC11	cg36601355	Gm7102	Gm7102_Intergenic_downstream	-0.000368066	0.432033	-4.29598	0.00011802	0.01702	-4.5812
cg31290715_TC21	cg31290715	Gli3	Gli3_Intergenic_upstream	-0.000303339	0.670772	-4.29524	0.000118284	0.0170499	-4.58339
cg48223151_BC12	cg48223151	Gm3376	Gm3376_Intergenic_downstream	-0.0008297	0.653648	-4.29497	0.000118381	0.0170555	-4.58419
cg40796230_BC11	cg40796230	Ccl27a	Ccl27a_Promoter	-0.000285266	0.541987	-4.29447	0.00011856	0.0170573	-4.58567
cg29205031_TC21	cg29205031	Ankrd36	Ankrd36_Exon	-0.000229027	0.655979	-4.2943	0.00011862	0.0170573	-4.58617
cg46400102_BC21	cg46400102	Pdgfd	Pdgfd_fiveUTR	-0.000164746	0.0545801	-4.29423	0.000118644	0.0170573	-4.58637
cg33826991_BC21	cg33826991	Krt8	Krt8_fiveUTR	-0.000349179	0.546487	-4.29413	0.000118682	0.0170573	-4.58668
cg33482786_BC21	cg33482786	Mroh5	Mroh5_Intergenic_upstream	-0.000421629	0.361826	-4.29337	0.000118952	0.0170878	-4.58891
cg44715927_TC21	cg44715927	Gm6567	Gm6567_Exon	-0.000228653	0.902375	-4.293	0.000119084	0.0170986	-4.59
cg44227643_BC21	cg44227643	Vmn1r71	Vmn1r71_fiveUTR	-0.000267205	0.872459	-4.29234	0.000119325	0.0171073	-4.59198
cg34692621_BC21	cg34692621	Vmn2r91	Vmn2r91_Promoter	-0.000640255	0.744996	-4.29229	0.000119341	0.0171073	-4.59211
ctl-BS-HPRT-CA-F-6889_TO21				0.000280266	0.132982	4.2915	0.000119625	0.0171318	-4.59444
cg31744494_TC21	cg31744494	Zfp457	Zfp457_Intron	-0.00030491	0.864187	-4.29124	0.00011972	0.0171318	-4.59522
rs246127201_TC11	rs246127201			-0.000116988	0.948756	-4.2901	0.000120132	0.0171821	-4.59859
cg33675255_BC21	cg33675255	Arsa	Arsa_Exon	-0.000270058	0.892847	-4.28995	0.000120188	0.0171821	-4.59904
cg29818700_TC21	cg29818700	Suz12	Suz12_Intron	-0.000167693	0.911304	-4.28946	0.000120365	0.017199	-4.60048
cg40291723_TC11	cg40291723	Camk2d	Camk2d_Exon	5.02382e-05	0.0142679	4.28911	0.000120491	0.0172046	-4.60151
cg31151197_BC21	cg31151197	Klc1	Klc1_threeUTR	-0.000262465	0.828061	-4.28903	0.00012052	0.0172046	-4.60174
cg48214324_TC21	cg48214324	Uty	Uty_Intron	-0.000314133	0.870371	-4.28821	0.000120821	0.0172393	-4.60419
cg31487861_BC21	cg31487861	Tmem170b	Tmem170b_Intergenic_downstream	-0.00026063	0.449634	-4.28686	0.000121314	0.0172929	-4.60818
cg39436766_BC21	cg39436766	Zfp512b	Zfp512b_Exon	-0.000208435	0.915142	-4.2864	0.00012148	0.0173052	-4.60952
cg48010454_BC21	cg48010454	Pcdh19	Pcdh19_Intergenic_downstream	-0.000636008	0.790414	-4.28624	0.00012154	0.0173052	-4.61
cg31071157_TC11	cg31071157	Atg2b	Atg2b_Intron	-0.000255541	0.886318	-4.28614	0.000121575	0.0173052	-4.61029
cg32682992_TC21	cg32682992	Lrch1	Lrch1_Intron	-0.000260105	0.830628	-4.28518	0.000121929	0.0173282	-4.61313
cg33357684_TC21	cg33357684	Mrpl13	Mrpl13_Exon	-0.000198867	0.909872	-4.28515	0.000121941	0.0173282	-4.61323
cg37560041_TC21	cg37560041	Cdc73	Cdc73_Intron	-0.000299641	0.851842	-4.28459	0.000122148	0.017345	-4.61489
cg28338733_TC21	cg28338733	A830082N09Rik	A830082N09Rik_Exon	-0.000189228	0.918322	-4.28431	0.000122248	0.0173509	-4.6157
cg37545495_TC11	cg37545495	Cfh	Cfh_Exon	0.000136169	0.0544965	4.28407	0.000122337	0.0173536	-4.61641
cg40059638_BC21	cg40059638	Otud7b	Otud7b_fiveUTR	-0.000227859	0.882273	-4.28394	0.000122384	0.0173536	-4.61679
cg41801925_BC21	cg41801925	Agrn	Agrn_Exon	-0.000189263	0.957405	-4.28342	0.00012258	0.017373	-4.61835
cg47851921_TC21	cg47851921	Ar	Ar_Intergenic_upstream	-0.000311539	0.839698	-4.28299	0.000122736	0.0173809	-4.6196
cg33493124_BC21	cg33493124	Ly6a	Ly6a_Promoter	-0.000302834	0.395223	-4.28295	0.000122753	0.0173809	-4.61973
cg41331774_BC21	cg41331774	Slc6a9	Slc6a9_threeUTR	-0.000242909	0.614915	-4.2826	0.000122882	0.0173884	-4.62077
cg48217468_BC11	cg48217468	Zfy2	Zfy2_Intron	-0.000743123	0.646139	-4.28233	0.000122982	0.0173884	-4.62156
cg37672074_TC21	cg37672074	Cop1	Cop1_Intergenic_downstream	-0.000303893	0.844122	-4.28181	0.000123176	0.0174075	-4.6231
cg48214770_TC11	cg48214770	Ddx3y	Ddx3y_Intron	-0.000322612	0.898213	-4.28143	0.000123317	0.0174153	-4.62422
ctl-BS-GRIK5-CA-F-24464_TC21				-0.000251639	0.89532	-4.28125	0.000123384	0.0174153	-4.62476
cg28358651_BC11	cg28358651	5730507C01Rik	5730507C01Rik_Intergenic_downstream	-0.000132778	0.601939	-4.28102	0.000123467	0.0174153	-4.62541
cg36411994_TC21	cg36411994	Loxl4	Loxl4_Exon	-0.000282884	0.80252	-4.28053	0.000123653	0.017425	-4.62689
cg36318663_TC11	cg36318663	Sgms1	Sgms1_Exon	-0.000271837	0.946181	-4.28004	0.000123835	0.0174424	-4.62833
cg35963022_TC21	cg35963022	Pstpip2	Pstpip2_Intron	-0.000632004	0.674173	-4.27957	0.000124009	0.0174585	-4.6297
cg31872999_TC21	cg31872999	Edil3	Edil3_Intergenic_upstream	-0.000297933	0.86352	-4.2792	0.000124149	0.0174662	-4.63081
cg47730105_BC21	cg47730105	Gabre	Gabre_Intergenic_upstream	-0.000696872	0.575453	-4.27911	0.000124182	0.0174662	-4.63107
cg41851562_TC21	cg41851562	Grm3	Grm3_Intergenic_upstream	-0.000578155	0.756004	-4.27777	0.000124683	0.0175285	-4.63502
cg46598680_BC21	cg46598680	Cdon	Cdon_fiveUTR	-0.00026556	0.868905	-4.27653	0.000125151	0.0175776	-4.63869
cg30321460_BC21	cg30321460	Cenpo	Cenpo_Promoter	-0.000218108	0.887922	-4.27622	0.000125269	0.0175794	-4.63961
cg45877046_TC21	cg45877046	Lsm6	Lsm6_Intergenic_downstream	-0.000355795	0.746167	-4.27559	0.000125507	0.0175883	-4.64147
cg38766724_BC21	cg38766724	Wt1os	Wt1os_Intron	-0.000246683	0.856879	-4.27555	0.000125521	0.0175883	-4.64158
cg40068106_TC21	cg40068106	Pias3	Pias3_threeUTR	-0.00031437	0.762772	-4.27554	0.000125524	0.0175883	-4.64161
cg36840160_TC21	cg36840160	Tbc1d8	Tbc1d8_Intron	-0.000266644	0.451883	-4.27517	0.000125665	0.0175996	-4.6427
cg39309331_TC21	cg39309331	Atp9a	Atp9a_Intron	-0.000297582	0.897754	-4.27462	0.000125875	0.0176107	-4.64434
cg45286052_TC21	cg45286052	Igf2	Igf2_fiveUTR	-0.000323281	0.216976	-4.2746	0.000125883	0.0176107	-4.64441
cg44014193_TC21	cg44014193	Klrh1	Klrh1_Promoter	-0.000522402	0.702923	-4.27449	0.000125925	0.0176107	-4.64473
cg38295878_TC21	cg38295878	Strbp	Strbp_Intron	-0.000358612	0.85884	-4.27429	0.000125999	0.0176107	-4.6453
cg33585448_BC21	cg33585448	Snu13	Snu13_Exon	-0.000332131	0.880589	-4.27418	0.000126041	0.0176107	-4.64564
cg31025833_BC11	cg31025833	Kif4-ps	Kif4-ps_Intergenic_upstream	0.000359738	0.145271	4.2735	0.000126302	0.0176308	-4.64766
cg39183533_BC21	cg39183533	Rprd1b	Rprd1b_Intron	-0.000113812	0.943647	-4.2734	0.000126339	0.0176308	-4.64795
cg30352388_BC21	cg30352388	Pum2	Pum2_threeUTR	-0.000269669	0.862949	-4.2732	0.000126416	0.0176308	-4.64854
cg37915138_TC21	cg37915138	Tgfb2	Tgfb2_Intergenic_downstream	-0.000205898	0.933784	-4.27299	0.000126493	0.0176308	-4.64914
cg41656895_TC21	cg41656895	Gm13103	Gm13103_Intron	-0.000256465	0.627226	-4.27294	0.000126515	0.0176308	-4.64931
rs29779002_TC21	rs29779002			-0.000190938	0.914172	-4.2726	0.000126642	0.0176308	-4.65029
cg40796403_TO21	cg40796403	Ccl27a	Ccl27a_Intergenic_upstream	-0.000148233	0.47269	-4.27255	0.000126662	0.0176308	-4.65044
cg36297895_TC21	cg36297895	Ric1	Ric1_Exon	-0.000354982	0.856204	-4.27212	0.000126824	0.0176452	-4.6517
cg44967808_TC21	cg44967808	Olfr502	Olfr502_threeUTR	-0.000605069	0.711797	-4.2719	0.000126912	0.017649	-4.65238
cg34809082_BC21	cg34809082	Cmtr1	Cmtr1_Intron	-0.000117967	0.930563	-4.27122	0.00012717	0.0176767	-4.65437
cg40709163_BC21	cg40709163	Gm11917	Gm11917_Exon	-0.000344297	0.84068	-4.27085	0.000127314	0.017681	-4.65548
cg33746479_BC11	cg33746479	Magi2	Magi2_Intergenic_downstream	-0.000252316	0.586556	-4.27083	0.000127321	0.017681	-4.65553
cg34367138_BC21	cg34367138	Robo2	Robo2_Intergenic_upstream	-0.000266731	0.900382	-4.27003	0.000127629	0.0177129	-4.6579
ctl-BS-RPS6KA5-CT-R-6557_BC11				-0.000139965	0.946406	-4.26992	0.00012767	0.0177129	-4.65821
cg45913827_BC21	cg45913827	Pkn1	Pkn1_Intron	-0.00030292	0.901284	-4.26818	0.000128341	0.0177795	-4.66335
cg42624306_TC21	cg42624306	Acacb	Acacb_Intron	-0.00024871	0.775134	-4.26794	0.000128433	0.0177795	-4.66405
cg40521968_BC21	cg40521968	5730460C07Rik	5730460C07Rik_Promoter	-0.000769143	0.640535	-4.26775	0.000128506	0.0177795	-4.66461
cg28394238_BC11	cg28394238	Armc2	Armc2_fiveUTR	0.000150529	0.0759327	4.26772	0.00012852	0.0177795	-4.66471
cg38090020_BC21	cg38090020	Malrd1	Malrd1_Promoter	-0.000166506	0.55581	-4.26753	0.000128592	0.0177795	-4.66526
cg32474501_BC21	cg32474501	Vmn2r88	Vmn2r88_Intron	-0.000245007	0.581845	-4.26743	0.000128631	0.0177795	-4.66556
cg34724950_BC21	cg34724950	Dcpp3	Dcpp3_Promoter	-0.000259812	0.436175	-4.26621	0.000129106	0.0177859	-4.66917
cg29168954_BC21	cg29168954	Olfr767	Olfr767_Promoter	-0.00040901	0.325853	-4.26611	0.000129145	0.0177859	-4.66946
cg47865133_BC21	cg47865133	Eda	Eda_Intron	-0.000600354	0.648238	-4.26605	0.000129168	0.0177859	-4.66964
cg47659454_BC21	cg47659454	Adgrg4	Adgrg4_Promoter	-0.000425826	0.450215	-4.26604	0.000129173	0.0177859	-4.66968
cg48235868_TC21	cg48235868	Gm20826	Gm20826_Intergenic_downstream	-0.000326754	0.788015	-4.26602	0.000129178	0.0177859	-4.66971
cg44409574_BC21	cg44409574	Scgb1b12	Scgb1b12_threeUTR	-0.000246806	0.33851	-4.26602	0.000129179	0.0177859	-4.66972
cg47041431_BC21	cg47041431	Ibtk	Ibtk_Intron	-0.000363995	0.780695	-4.26591	0.000129222	0.0177859	-4.67005
cg30904467_TC11	cg30904467	Ylpm1	Ylpm1_Intron	-0.000318294	0.758738	-4.26577	0.000129278	0.0177859	-4.67047
ctl-BS-RPS6KA3-CT-R-89880_BC11				0.000593405	0.669972	4.26521	0.000129495	0.0178075	-4.67211
cg39156009_TC21	cg39156009	Gdf5	Gdf5_Intergenic_downstream	-0.000394843	0.545719	-4.2648	0.000129653	0.017817	-4.67331
cg44724172_BC21	cg44724172	St8sia2	St8sia2_Intron	-0.000358488	0.855834	-4.26472	0.000129684	0.017817	-4.67355
rs228945691_BC21	rs228945691			-0.000240674	0.907485	-4.26331	0.000130237	0.0178847	-4.67772
cg44468848_BC21	cg44468848	Zfp939	Zfp939_Intergenic_upstream	-0.000294271	0.820211	-4.26277	0.000130451	0.0179057	-4.67932
cg40796419_TC21	cg40796419	Ccl27a	Ccl27a_Intergenic_upstream	0.000198986	0.731812	4.26181	0.000130827	0.017949	-4.68214
ctl-BS-RPL27-CT-F-2284_BC21				-0.000675346	0.708766	-4.26146	0.000130966	0.0179598	-4.68318
cg47940215_TC21	cg47940215	Dach2	Dach2_Intron	-0.00063948	0.660029	-4.26125	0.000131047	0.0179625	-4.68379
cg38652077_BC21	cg38652077	Olfr1157	Olfr1157_Promoter	-0.000469062	0.863698	-4.26074	0.000131251	0.0179821	-4.68531
cg37147792_TC21	cg37147792	Irs1	Irs1_fiveUTR	-0.000485122	0.816328	-4.26044	0.000131367	0.0179898	-4.68618
cg38641113_TC11	cg38641113	Olfr988	Olfr988_Intergenic_upstream	-0.000566009	0.828686	-4.25835	0.000132199	0.0180914	-4.69236
cg33119298_BC21	cg33119298	4921515E04Rik	4921515E04Rik_Intergenic_downstream	-0.000521716	0.731643	-4.25814	0.00013228	0.0180914	-4.69296
cg48122202_TC21	cg48122202	Kctd12b	Kctd12b_Intergenic_downstream	-0.000386187	0.776455	-4.25811	0.000132293	0.0180914	-4.69305
cg40796923_BC11	cg40796923	Gm21541	Gm21541_Intergenic_upstream	-0.00013377	0.57487	-4.25724	0.000132641	0.0181223	-4.69563
cg36647910_BC11	cg36647910	Prex2	Prex2_Intron	-0.000284881	0.905689	-4.25653	0.000132925	0.0181386	-4.69772
cg35251328_TC21	cg35251328	Hnrnpll	Hnrnpll_Promoter	-0.000328803	0.808289	-4.25648	0.000132944	0.0181386	-4.69786
cg48217278_BC21	cg48217278	Zfy2	Zfy2_Intergenic_downstream	-0.000952093	0.518579	-4.25609	0.0001331	0.0181516	-4.69901
cg40726900_TC21	cg40726900	Bach2	Bach2_Intron	-0.00040135	0.74444	-4.25569	0.000133262	0.0181653	-4.7002
cg34979250_BC21	cg34979250	Trerf1	Trerf1_Intron	-0.000256866	0.831876	-4.25547	0.00013335	0.0181689	-4.70085
cg48030572_BC21	cg48030572	5730412P04Rik	5730412P04Rik_Intergenic_downstream	-0.000816176	0.721478	-4.2553	0.000133419	0.0181699	-4.70136
cg47984863_BC21	cg47984863	Gm382	Gm382_Intergenic_upstream	-0.000791235	0.563032	-4.25468	0.000133669	0.0181852	-4.70319
cg38924699_TC11	cg38924699	Gabpb1	Gabpb1_Intron	-0.000183512	0.89615	-4.2545	0.000133742	0.0181852	-4.70372
cg42383067_BC21	cg42383067	Prr27	Prr27_Intron	-0.000581184	0.737102	-4.25444	0.000133765	0.0181852	-4.70389
cg29829870_TC21	cg29829870	Asic2	Asic2_Intron	-0.000281651	0.74621	-4.25441	0.000133777	0.0181852	-4.70398
cg47125364_TC21	cg47125364	Slc25a36	Slc25a36_Intron	-0.000172574	0.919588	-4.25373	0.000134052	0.0182054	-4.70599
cg47387205_TC21	cg47387205	Ackr2	Ackr2_fiveUTR	-0.000241293	0.411864	-4.25365	0.000134083	0.0182054	-4.70622
cg28889142_TC11	cg28889142	4930556N09Rik	4930556N09Rik_Intron	-0.000161448	0.880776	-4.25358	0.00013411	0.0182054	-4.70641
cg40797918_TO21	cg40797918	Fam205a2	Fam205a2_Promoter	-0.000363387	0.72134	-4.25308	0.000134311	0.0182243	-4.70788
cg30593725_TC11	cg30593725	Pnpla8	Pnpla8_fiveUTR	-0.000284457	0.875674	-4.25258	0.000134516	0.0182354	-4.70938
cg33195007_TC21	cg33195007	Ctnnd2	Ctnnd2_Intron	-0.000275776	0.847131	-4.25213	0.000134698	0.0182493	-4.7107
cg31093640_TC11	cg31093640	4930465M20Rik	4930465M20Rik_Intergenic_downstream	-0.000748251	0.746723	-4.25154	0.000134937	0.0182631	-4.71243
cg37276253_TC21	cg37276253	Pam	Pam_Intron	-0.000232083	0.824779	-4.25133	0.000135021	0.0182631	-4.71304
cg31374540_TC12	cg31374540	Prl7d1	Prl7d1_Promoter	-0.00044828	0.543077	-4.25131	0.000135028	0.0182631	-4.7131
cg36181649_BC21	cg36181649	Psat1	Psat1_Intergenic_downstream	-0.000469864	0.830159	-4.25079	0.00013524	0.018275	-4.71463
cg31805121_BC21	cg31805121	Cast	Cast_Exon	-0.000378268	0.797988	-4.25049	0.000135365	0.0182825	-4.71554
cg32797247_TC21	cg32797247	Pcdh9	Pcdh9_Intergenic_downstream	-0.000492066	0.718436	-4.25018	0.00013549	0.0182837	-4.71644
cg36163466_BC21	cg36163466	A330040F15Rik	A330040F15Rik_Intron	-0.000227838	0.892352	-4.24938	0.000135818	0.0183196	-4.71881
cg38129270_BC21	cg38129270	Gpr158	Gpr158_Intron	-0.000148107	0.926899	-4.24903	0.000135961	0.0183306	-4.71984
ctl-BS-HPRT-CA-R-17678_TC21				-0.00025677	0.360112	-4.24877	0.000136068	0.0183367	-4.72061
cg41745186_TC11	cg41745186	Gpr153	Gpr153_Exon	-0.00026238	0.925814	-4.24792	0.000136416	0.0183752	-4.72311
cg30293468_BC21	cg30293468	Pcyt2	Pcyt2_Exon	-0.000269092	0.734863	-4.24747	0.000136602	0.0183919	-4.72444
cg45942127_BC11	cg45942127	Phkb	Phkb_Exon	-0.000297461	0.871884	-4.24629	0.000137087	0.0184405	-4.72792
cg43478250_TC21	cg43478250	Abcg2	Abcg2_Intergenic_upstream	-0.000221436	0.651942	-4.24527	0.000137506	0.0184884	-4.7309
cg48214249_BC21	cg48214249	Uty	Uty_Intron	-0.000283688	0.887534	-4.24491	0.000137655	0.0185	-4.73196
cg35097185_BC21	cg35097185	Efna5	Efna5_Intergenic_upstream	-0.000257019	0.294031	-4.24449	0.000137831	0.0185153	-4.73322
cg46619707_TC11	cg46619707	Olfr936	Olfr936_Promoter	0.000383665	0.137154	4.24385	0.000138095	0.0185342	-4.73509
cg35498895_BC11	cg35498895	Ccdc178	Ccdc178_Intron	-0.000359528	0.885373	-4.24293	0.000138477	0.0185768	-4.73779
cg28333486_BC11	cg28333486	Nkain2	Nkain2_fiveUTR	0.000107966	0.0294113	4.24249	0.000138664	0.0185934	-4.73911
cg33799186_TC11	cg33799186	Fam186a	Fam186a_fiveUTR	-0.000511588	0.79269	-4.24181	0.000138946	0.0186144	-4.7411
cg47421672_BC11	cg47421672	Ccnb3	Ccnb3_Intergenic_downstream	-0.000848629	0.671628	-4.24133	0.000139148	0.018633	-4.74253
ctl-BS-RPS6KA6-CA-R-72422_TO11				-0.000103439	0.962171	-4.24113	0.00013923	0.0186355	-4.7431
cg36729156_BC21	cg36729156	Col9a1	Col9a1_fiveUTR	-0.000273253	0.487621	-4.24085	0.000139347	0.0186427	-4.74392
cg29076671_BC21	cg29076671	Hmga2	Hmga2_Intergenic_upstream	-0.000319458	0.738951	-4.24049	0.0001395	0.0186549	-4.745
ctl-BS-RPS6KA6-CA-R-93034_BO21				0.00071651	0.322154	4.24019	0.000139627	0.0186633	-4.74589
cg45446054_TC21	cg45446054	Defb3	Defb3_Intergenic_upstream	-0.000340356	0.352479	-4.23953	0.000139903	0.018684	-4.74782
cg47807568_BC11	cg47807568	Mir1906-1	Mir1906-1_Intergenic_downstream	-0.000344219	0.575264	-4.23932	0.000139991	0.018684	-4.74844
cg41320987_TC21	cg41320987	Hectd3	Hectd3_Exon	-0.000270423	0.883575	-4.23922	0.000140034	0.018684	-4.74874
cg30575304_TC11	cg30575304	Dock4	Dock4_Intron	-0.000154266	0.931266	-4.23883	0.000140196	0.0186947	-4.74987
cg43506352_TC11	cg43506352	Grid2	Grid2_Intron	-0.000495019	0.436044	-4.23873	0.00014024	0.0186947	-4.75018
cg48220595_TC11	cg48220595	H2al2b	H2al2b_Promoter	-0.000990596	0.837468	-4.23746	0.000140778	0.0187463	-4.75393
cg35660903_BC21	cg35660903	Stk32a	Stk32a_Intron	0.000180006	0.0712508	4.23736	0.000140818	0.0187463	-4.7542
cg36280332_BC11	cg36280332	Rfx3	Rfx3_Exon	-0.000277905	0.891187	-4.23736	0.000140818	0.0187463	-4.7542
cg40262024_BC21	cg40262024	Gclm	Gclm_threeUTR	-0.000335519	0.884328	-4.2367	0.000141098	0.0187684	-4.75615
cg39502592_BC21	cg39502592	Ralyl	Ralyl_Intron	-0.000635776	0.68836	-4.23667	0.00014111	0.0187684	-4.75623
cg30002689_TC11	cg30002689	Fbxo47	Fbxo47_Promoter	0.000244043	0.102832	4.23639	0.000141229	0.018769	-4.75706
rs29192233_BC21	rs29192233			-0.000476122	0.78225	-4.23622	0.000141303	0.018769	-4.75757
cg40658276_TC11	cg40658276	Cngb3	Cngb3_Intron	-0.000414221	0.831705	-4.23621	0.000141305	0.018769	-4.75758
cg33118055_BC21	cg33118055	4921515E04Rik	4921515E04Rik_Intergenic_downstream	-0.000599464	0.818264	-4.23595	0.000141416	0.0187753	-4.75835
cg29325451_BC21	cg29325451	Usp34	Usp34_Exon	-0.000492999	0.810135	-4.23564	0.00014155	0.0187847	-4.75928
cg43530299_TC21	cg43530299	Rprl1	Rprl1_Intergenic_downstream	-0.000134589	0.920513	-4.23476	0.000141922	0.0188257	-4.76185
cg28775703_BC21	cg28775703	Rfx4	Rfx4_Exon	-0.00036865	0.800623	-4.23399	0.000142252	0.018861	-4.76413
cg46978950_TC11	cg46978950	Fam83b	Fam83b_Intron	-0.000273122	0.901045	-4.2336	0.000142419	0.0188675	-4.76527
cg47653996_BC11	cg47653996	3830403N18Rik	3830403N18Rik_Promoter	-0.00075958	0.651184	-4.23358	0.000142428	0.0188675	-4.76534
cg31378666_BC21	cg31378666	2610307P16Rik	2610307P16Rik_Intron	-0.000381689	0.753076	-4.23337	0.000142518	0.0188709	-4.76595
cg47764411_TC21	cg47764411	4930480E11Rik	4930480E11Rik_Intergenic_upstream	-0.000390808	0.243344	-4.23268	0.000142816	0.0188893	-4.768
cg39719219_BC21	cg39719219	Gm7977	Gm7977_Intergenic_upstream	-0.000255968	0.868595	-4.23266	0.000142825	0.0188893	-4.76806
cg48000984_BC11	cg48000984	Diaph2	Diaph2_Intron	-0.000548309	0.853609	-4.2326	0.000142848	0.0188893	-4.76822
cg47731001_TC21	cg47731001	Gabra3	Gabra3_Intron	-0.000307348	0.867538	-4.23199	0.000143113	0.0189158	-4.77003
cg41872536_TC11	cg41872536	Pclo	Pclo_Intron	0.000283226	0.124752	4.23138	0.000143372	0.0189386	-4.7718
cg38340780_TC21	cg38340780	1700019E08Rik	1700019E08Rik_Intergenic_upstream	-0.0003302	0.868039	-4.23129	0.000143413	0.0189386	-4.77208
cg44653359_TC21	cg44653359	1810008I18Rik	1810008I18Rik_Intergenic_upstream	-0.000300056	0.846	-4.23113	0.000143482	0.0189392	-4.77255
cg30218061_TC21	cg30218061	Llgl2	Llgl2_Intron	-0.000217105	0.883006	-4.23041	0.000143793	0.0189719	-4.77467
cg29520857_TC21	cg29520857	Platr20	Platr20_Promoter	-0.000384879	0.349258	-4.23016	0.000143899	0.0189773	-4.77539
cg28261786_TC21	cg28261786	H60b	H60b_Exon	-0.000343269	0.761978	-4.22957	0.000144157	0.019003	-4.77715
cg47634087_TC21	cg47634087	Gpc4	Gpc4_Intron	-0.000346584	0.873514	-4.22921	0.000144313	0.0190079	-4.7782
cg47588479_TC21	cg47588479	Tenm1	Tenm1_Promoter	-0.000554939	0.761014	-4.22919	0.000144323	0.0190079	-4.77827
cg29853340_BC21	cg29853340	Ccl4	Ccl4_Exon	-0.000281563	0.735427	-4.22893	0.000144436	0.0190143	-4.77904
cg44542701_TC21	cg44542701	C86187	C86187_Intergenic_downstream	-0.000528449	0.720943	-4.22816	0.000144768	0.0190495	-4.78128
cg47915638_BC11	cg47915638	2610002M06Rik	2610002M06Rik_Intron	-0.000662529	0.656552	-4.22755	0.000145034	0.0190729	-4.78308
cg43196707_TC21	cg43196707	Kcnd2	Kcnd2_Intron	-0.000408657	0.809407	-4.22746	0.000145074	0.0190729	-4.78335
cg33779094_TC21	cg33779094	Arf3	Arf3_Exon	-0.000331817	0.852305	-4.22515	0.000146083	0.0191885	-4.79014
cg29636869_TC21	cg29636869	Ubb	Ubb_fiveUTR	-0.000276881	0.271915	-4.22486	0.000146212	0.0191912	-4.791
cg42382985_BC21	cg42382985	Csn1s2b	Csn1s2b_Intron	-0.000650814	0.796782	-4.22481	0.000146234	0.0191912	-4.79114
cg42985138_TC21	cg42985138	Zfp12	Zfp12_threeUTR	-0.000229292	0.881334	-4.22452	0.000146361	0.0191981	-4.792
cg30097574_BC21	cg30097574	Mettl2	Mettl2_Intergenic_downstream	-0.000339409	0.525241	-4.2244	0.000146416	0.0191981	-4.79236
cg39382238_BC21	cg39382238	Gnasas1	Gnasas1_Exon	-0.000207048	0.483747	-4.2242	0.000146501	0.0192008	-4.79293
cg30283012_BC21	cg30283012	Aatk	Aatk_Intron	-0.000207414	0.860193	-4.22396	0.000146609	0.0192014	-4.79365
cg47859957_BC21	cg47859957	Gm14812	Gm14812_Intergenic_downstream	-0.000460093	0.844249	-4.2237	0.00014672	0.0192014	-4.79439
cg34592900_TC21	cg34592900	Tmem181a	Tmem181a_Exon	-0.000461155	0.734541	-4.2236	0.000146765	0.0192014	-4.79469
cg36907021_TC21	cg36907021	C230029F24Rik	C230029F24Rik_Intergenic_downstream	-0.000429672	0.838561	-4.22337	0.000146865	0.019206	-4.79536
cg39831971_TC11	cg39831971	Vmn2r3	Vmn2r3_threeUTR	-0.000713369	0.771762	-4.22311	0.000146982	0.0192128	-4.79614
cg30826004_BC11	cg30826004	Fntb	Fntb_Intron	-0.000156275	0.0578781	-4.22185	0.000147541	0.0192747	-4.79986
cg43940290_BC21	cg43940290	A2m	A2m_Intergenic_downstream	-0.00025581	0.570661	-4.22175	0.000147586	0.0192747	-4.80015
cg36825008_BC21	cg36825008	Rev1	Rev1_Intron	-0.000194325	0.91337	-4.22153	0.000147683	0.0192789	-4.8008
cg44063291_BC21	cg44063291	Gucy2c	Gucy2c_Intron	-0.000249451	0.700441	-4.22127	0.000147799	0.0192808	-4.80156
cg40545627_TC11	cg40545627	Zranb2	Zranb2_Exon	-0.000102492	0.94319	-4.22079	0.000148009	0.0192808	-4.80295
cg28892839_TC21	cg28892839	Lum	Lum_Intergenic_upstream	-0.000152832	0.793227	-4.2206	0.000148093	0.0192808	-4.80351
cg44314039_TC21	cg44314039	Zfp114	Zfp114_Intron	-0.000215914	0.669228	-4.22057	0.000148107	0.0192808	-4.8036
ctl-BS-RPS6KA6-CT-R-125248_TC11				-0.00100918	0.767458	-4.22053	0.000148128	0.0192808	-4.80374
cg47491018_TC21	cg47491018	Efhc2	Efhc2_Intron	-0.000491224	0.818814	-4.22043	0.000148173	0.0192808	-4.80404
cg33578679_BC21	cg33578679	Rbx1	Rbx1_Intergenic_downstream	-0.000283574	0.46836	-4.2204	0.000148185	0.0192808	-4.80412
cg48231473_BC21	cg48231473	Gm20826	Gm20826_Intron	-0.000468114	0.581676	-4.22021	0.00014827	0.0192808	-4.80468
cg38643814_TC21	cg38643814	Olfr1032	Olfr1032_Promoter	-0.000155667	0.928945	-4.22013	0.000148306	0.0192808	-4.80491
cg31721090_BC21	cg31721090	Ptch1	Ptch1_Intergenic_upstream	-0.000283553	0.893916	-4.22003	0.000148349	0.0192808	-4.8052
cg32474155_BC11	cg32474155	4930597G03Rik	4930597G03Rik_Intron	-0.000532538	0.599071	-4.21964	0.000148523	0.0192902	-4.80635
cg42552411_TC11	cg42552411	Rpap2	Rpap2_Intron	-0.000268856	0.893685	-4.21957	0.000148552	0.0192902	-4.80654
cg47891244_TC21	cg47891244	Jpx	Jpx_Intron	-0.000157782	0.926012	-4.21807	0.000149226	0.0193635	-4.81097
cg31008015_TC21	cg31008015	Foxn3	Foxn3_Intron	-0.000542323	0.284839	-4.21783	0.000149333	0.0193635	-4.81167
cg38139471_TC21	cg38139471	Nxph2	Nxph2_Intron	-0.000283986	0.331161	-4.21783	0.000149333	0.0193635	-4.81167
cg47842208_TC11	cg47842208	Zc3h12b	Zc3h12b_Intron	-0.000223759	0.932295	-4.21773	0.000149378	0.0193635	-4.81196
cg48230240_TC11	cg48230240	Gm3376	Gm3376_Intergenic_downstream	-0.000551167	0.799853	-4.21725	0.000149594	0.019383	-4.81338
cg36163805_TC21	cg36163805	Gm4952	Gm4952_Intron	-0.000749511	0.420392	-4.21687	0.000149765	0.0193834	-4.8145
cg30798718_TC21	cg30798718	Snapc1	Snapc1_Intron	-0.000258541	0.898875	-4.21668	0.000149849	0.0193834	-4.81504
cg41706173_BC21	cg41706173	Pik3cd	Pik3cd_Promoter	-0.000214118	0.910288	-4.21662	0.000149876	0.0193834	-4.81522
cg41445622_BC21	cg41445622	Phc2	Phc2_Promoter	-0.00021819	0.260996	-4.21654	0.000149913	0.0193834	-4.81546
cg31897294_TC21	cg31897294	Rasgrf2	Rasgrf2_Intergenic_upstream	-0.000114843	0.391339	-4.21651	0.000149924	0.0193834	-4.81554
[truncated: 3,749 more rows]
