# Supplementary material for: Intermittent Hypoxia Mimicking Sleep Apnea Induces Systemic and Tissue Specific Epigenetic Changes and p16-Mediated Cellular Senescence Underlying Vascular Dysfunction
Source: Research Square preprint supplement (doi:10.21203/rs.3.rs-9371471/v1), 2026-04-15
Supplement: Supplementary file 5 [file a46f966ded0b1b3f8745b881.xlsx]

## Sheet: Sheet1
Supplementary Table S4: Distribution of DMP-associated gene regions in left cardiac ventricle and PBMC samples.
Left cardiac ventricle					PBMC
	Higher methylation					Higher methylation
CpG position	IH	RA	pvalue*		CpG position	IH	RA	pvalue*
Upstream	22	386	0.6612		Upstream	123	19	<0.0001
Promoter	90	380	<0.0001		Promoter	125	55	0.6589
5' UTR	61	128	<0.0001		5' UTR	42	54	<0.0001
Exon	58	836	0.1357		Exon	115	59	0.1512
Intron	59	1441	<0.0001		Intron	393	152	0.6818
3' UTR	3	201	0.0001		3' UTR	23	17	0.0755
Downstream	19	357	0.0421		Downstream	105	24	0.0056
*: Fisher's Exact Test					*: Fisher's Exact Test
